# Supplementary material
Source: ML conference proceedings conference paper supplement (https://proceedings.neurips.cc/paper_files/paper/2022/hash/040c816286b3844fd78f2124eec75f2e-Abstract.html)
Supplement: Supplementary file 1 [file 040c816286b3844fd78f2124eec75f2e-Supplemental-Conference.zip]

Archive with 201 entries (164 files):
- DSSL/
- DSSL/DSSL/
- DSSL/DSSL/.DS_Store
- __MACOSX/
- __MACOSX/DSSL/
- __MACOSX/DSSL/DSSL/
- __MACOSX/DSSL/DSSL/._.DS_Store
- DSSL/DSSL/data/
- DSSL/DSSL/data/cornell.mat
- __MACOSX/DSSL/DSSL/data/
- __MACOSX/DSSL/DSSL/data/._cornell.mat
- DSSL/DSSL/data/Planetoid/
- DSSL/DSSL/data/Planetoid/.DS_Store
- __MACOSX/DSSL/DSSL/data/Planetoid/
- __MACOSX/DSSL/DSSL/data/Planetoid/._.DS_Store
- DSSL/DSSL/data/Planetoid/Cora/
- DSSL/DSSL/data/Planetoid/Cora/processed/
- DSSL/DSSL/data/Planetoid/Cora/processed/pre_transform.pt
- __MACOSX/DSSL/DSSL/data/Planetoid/Cora/
- __MACOSX/DSSL/DSSL/data/Planetoid/Cora/processed/
- __MACOSX/DSSL/DSSL/data/Planetoid/Cora/processed/._pre_transform.pt
- DSSL/DSSL/data/Planetoid/Cora/processed/pre_filter.pt
- __MACOSX/DSSL/DSSL/data/Planetoid/Cora/processed/._pre_filter.pt
- DSSL/DSSL/data/Planetoid/Cora/processed/data.pt
- __MACOSX/DSSL/DSSL/data/Planetoid/Cora/processed/._data.pt
- __MACOSX/DSSL/DSSL/data/Planetoid/Cora/._processed
- DSSL/DSSL/data/Planetoid/Cora/raw/
- DSSL/DSSL/data/Planetoid/Cora/raw/ind.cora.ally
- __MACOSX/DSSL/DSSL/data/Planetoid/Cora/raw/
- __MACOSX/DSSL/DSSL/data/Planetoid/Cora/raw/._ind.cora.ally
- DSSL/DSSL/data/Planetoid/Cora/raw/ind.cora.test.index
- __MACOSX/DSSL/DSSL/data/Planetoid/Cora/raw/._ind.cora.test.index
- DSSL/DSSL/data/Planetoid/Cora/raw/ind.cora.allx
- __MACOSX/DSSL/DSSL/data/Planetoid/Cora/raw/._ind.cora.allx
- DSSL/DSSL/data/Planetoid/Cora/raw/cora.content
- __MACOSX/DSSL/DSSL/data/Planetoid/Cora/raw/._cora.content
- DSSL/DSSL/data/Planetoid/Cora/raw/ind.cora.tx
- __MACOSX/DSSL/DSSL/data/Planetoid/Cora/raw/._ind.cora.tx
- DSSL/DSSL/data/Planetoid/Cora/raw/ind.cora.ty
- __MACOSX/DSSL/DSSL/data/Planetoid/Cora/raw/._ind.cora.ty
- DSSL/DSSL/data/Planetoid/Cora/raw/cora.cites
- __MACOSX/DSSL/DSSL/data/Planetoid/Cora/raw/._cora.cites
- DSSL/DSSL/data/Planetoid/Cora/raw/ind.cora.graph
- __MACOSX/DSSL/DSSL/data/Planetoid/Cora/raw/._ind.cora.graph
- DSSL/DSSL/data/Planetoid/Cora/raw/trans.cora.y
- __MACOSX/DSSL/DSSL/data/Planetoid/Cora/raw/._trans.cora.y
- DSSL/DSSL/data/Planetoid/Cora/raw/trans.cora.x
- __MACOSX/DSSL/DSSL/data/Planetoid/Cora/raw/._trans.cora.x
- DSSL/DSSL/data/Planetoid/Cora/raw/trans.cora.graph
- __MACOSX/DSSL/DSSL/data/Planetoid/Cora/raw/._trans.cora.graph
- DSSL/DSSL/data/Planetoid/Cora/raw/trans.cora.tx
- __MACOSX/DSSL/DSSL/data/Planetoid/Cora/raw/._trans.cora.tx
- DSSL/DSSL/data/Planetoid/Cora/raw/trans.cora.ty
- __MACOSX/DSSL/DSSL/data/Planetoid/Cora/raw/._trans.cora.ty
- DSSL/DSSL/data/Planetoid/Cora/raw/ind.cora.x
- __MACOSX/DSSL/DSSL/data/Planetoid/Cora/raw/._ind.cora.x
- DSSL/DSSL/data/Planetoid/Cora/raw/ind.cora.y
- __MACOSX/DSSL/DSSL/data/Planetoid/Cora/raw/._ind.cora.y
- __MACOSX/DSSL/DSSL/data/Planetoid/Cora/._raw
- __MACOSX/DSSL/DSSL/data/Planetoid/._Cora
- __MACOSX/DSSL/DSSL/data/._Planetoid
- DSSL/DSSL/data/.DS_Store
- __MACOSX/DSSL/DSSL/data/._.DS_Store
- DSSL/DSSL/data/facebook100/
- DSSL/DSSL/data/facebook100/.DS_Store
- __MACOSX/DSSL/DSSL/data/facebook100/
- __MACOSX/DSSL/DSSL/data/facebook100/._.DS_Store
- DSSL/DSSL/data/facebook100/Penn94.mat
- __MACOSX/DSSL/DSSL/data/facebook100/._Penn94.mat
- __MACOSX/DSSL/DSSL/data/._facebook100
- DSSL/DSSL/data/texas.mat
- __MACOSX/DSSL/DSSL/data/._texas.mat
- DSSL/DSSL/data/twitch/
- DSSL/DSSL/data/twitch/.DS_Store
- __MACOSX/DSSL/DSSL/data/twitch/
- __MACOSX/DSSL/DSSL/data/twitch/._.DS_Store
- DSSL/DSSL/data/twitch/citing.txt
- __MACOSX/DSSL/DSSL/data/twitch/._citing.txt
- DSSL/DSSL/data/twitch/DE/
- DSSL/DSSL/data/twitch/DE/musae_DE_edges.csv
- __MACOSX/DSSL/DSSL/data/twitch/DE/
- __MACOSX/DSSL/DSSL/data/twitch/DE/._musae_DE_edges.csv
- DSSL/DSSL/data/twitch/DE/musae_DE_features.json
- __MACOSX/DSSL/DSSL/data/twitch/DE/._musae_DE_features.json
- DSSL/DSSL/data/twitch/DE/musae_DE_target.csv
- __MACOSX/DSSL/DSSL/data/twitch/DE/._musae_DE_target.csv
- __MACOSX/DSSL/DSSL/data/twitch/._DE
- DSSL/DSSL/data/twitch/README.txt
- __MACOSX/DSSL/DSSL/data/twitch/._README.txt
- __MACOSX/DSSL/DSSL/data/._twitch
- DSSL/DSSL/data/squirrel.mat
- __MACOSX/DSSL/DSSL/data/._squirrel.mat
- DSSL/DSSL/src/
- DSSL/DSSL/src/.DS_Store
- __MACOSX/DSSL/DSSL/src/
- __MACOSX/DSSL/DSSL/src/._.DS_Store
- DSSL/DSSL/src/models.py
- __MACOSX/DSSL/DSSL/src/._models.py
- DSSL/DSSL/src/datasets.py
- __MACOSX/DSSL/DSSL/src/._datasets.py
- DSSL/DSSL/src/encoders.py
- __MACOSX/DSSL/DSSL/src/._encoders.py
- DSSL/DSSL/src/__pycache__/
- DSSL/DSSL/src/__pycache__/logger.cpython-38.pyc
- __MACOSX/DSSL/DSSL/src/__pycache__/
- __MACOSX/DSSL/DSSL/src/__pycache__/._logger.cpython-38.pyc
- DSSL/DSSL/src/__pycache__/logger.cpython-39.pyc
- __MACOSX/DSSL/DSSL/src/__pycache__/._logger.cpython-39.pyc
- DSSL/DSSL/src/__pycache__/models.cpython-39.pyc
- __MACOSX/DSSL/DSSL/src/__pycache__/._models.cpython-39.pyc
- DSSL/DSSL/src/__pycache__/models.cpython-38.pyc
- __MACOSX/DSSL/DSSL/src/__pycache__/._models.cpython-38.pyc
- DSSL/DSSL/src/__pycache__/data_utils.cpython-39.pyc
- __MACOSX/DSSL/DSSL/src/__pycache__/._data_utils.cpython-39.pyc
- DSSL/DSSL/src/__pycache__/data_utils.cpython-38.pyc
- __MACOSX/DSSL/DSSL/src/__pycache__/._data_utils.cpython-38.pyc
- DSSL/DSSL/src/__pycache__/encoders.cpython-39.pyc
- __MACOSX/DSSL/DSSL/src/__pycache__/._encoders.cpython-39.pyc
- DSSL/DSSL/src/__pycache__/dataset.cpython-38.pyc
- __MACOSX/DSSL/DSSL/src/__pycache__/._dataset.cpython-38.pyc
- DSSL/DSSL/src/__pycache__/dataset.cpython-39.pyc
- __MACOSX/DSSL/DSSL/src/__pycache__/._dataset.cpython-39.pyc
- __MACOSX/DSSL/DSSL/src/.___pycache__
- DSSL/DSSL/src/batch_utils.py
- __MACOSX/DSSL/DSSL/src/._batch_utils.py
- DSSL/DSSL/src/logger.py
- __MACOSX/DSSL/DSSL/src/._logger.py
- DSSL/DSSL/src/dataset.py
- __MACOSX/DSSL/DSSL/src/._dataset.py
- DSSL/DSSL/src/data_utils.py
- __MACOSX/DSSL/DSSL/src/._data_utils.py
- DSSL/DSSL/src/utils.py
- __MACOSX/DSSL/DSSL/src/._utils.py
- DSSL/DSSL/src/sample.py
- __MACOSX/DSSL/DSSL/src/._sample.py
- DSSL/DSSL/src/parse.py
- __MACOSX/DSSL/DSSL/src/._parse.py
- DSSL/DSSL/src/main.py
- __MACOSX/DSSL/DSSL/src/._main.py
- DSSL/DSSL/src/normalization.py
- __MACOSX/DSSL/DSSL/src/._normalization.py
- DSSL/DSSL/src/data/
- DSSL/DSSL/src/data/.DS_Store
- __MACOSX/DSSL/DSSL/src/data/
- __MACOSX/DSSL/DSSL/src/data/._.DS_Store
- DSSL/DSSL/src/data/facebook100/
- DSSL/DSSL/src/data/facebook100/.DS_Store
- __MACOSX/DSSL/DSSL/src/data/facebook100/
- __MACOSX/DSSL/DSSL/src/data/facebook100/._.DS_Store
- DSSL/DSSL/src/data/facebook100/Penn94.mat
- __MACOSX/DSSL/DSSL/src/data/facebook100/._Penn94.mat
- __MACOSX/DSSL/DSSL/src/data/._facebook100
- DSSL/DSSL/src/data/splits/
- DSSL/DSSL/src/data/splits/.DS_Store
- __MACOSX/DSSL/DSSL/src/data/splits/
- __MACOSX/DSSL/DSSL/src/data/splits/._.DS_Store
- DSSL/DSSL/src/data/splits/squirrel-splits.npy
- __MACOSX/DSSL/DSSL/src/data/splits/._squirrel-splits.npy
- DSSL/DSSL/src/data/splits/fb100-Penn94-splits.npy
- __MACOSX/DSSL/DSSL/src/data/splits/._fb100-Penn94-splits.npy
- DSSL/DSSL/src/data/splits/texas-splits.npy
- __MACOSX/DSSL/DSSL/src/data/splits/._texas-splits.npy
- DSSL/DSSL/src/data/splits/cornell-splits.npy
- __MACOSX/DSSL/DSSL/src/data/splits/._cornell-splits.npy
- __MACOSX/DSSL/DSSL/src/data/._splits
- __MACOSX/DSSL/DSSL/src/._data
- DSSL/DSSL/src/data.py
- __MACOSX/DSSL/DSSL/src/._data.py
- __MACOSX/DSSL/DSSL/._src
- DSSL/.DS_Store
- __MACOSX/DSSL/._.DS_Store
- DSSL/DSSL_main_appendix.pdf
- __MACOSX/DSSL/._DSSL_main_appendix.pdf
- DSSL/.gitignore
- __MACOSX/DSSL/._.gitignore
- DSSL/.vscode/
- DSSL/.vscode/launch.json
- __MACOSX/DSSL/.vscode/
- __MACOSX/DSSL/.vscode/._launch.json
- __MACOSX/DSSL/._.vscode
- DSSL/.idea/
- DSSL/.idea/inspectionProfiles/
- DSSL/.idea/inspectionProfiles/profiles_settings.xml
- __MACOSX/DSSL/.idea/
- __MACOSX/DSSL/.idea/inspectionProfiles/
- __MACOSX/DSSL/.idea/inspectionProfiles/._profiles_settings.xml
- __MACOSX/DSSL/.idea/._inspectionProfiles
- DSSL/.idea/vcs.xml
- __MACOSX/DSSL/.idea/._vcs.xml
- DSSL/.idea/.gitignore
- __MACOSX/DSSL/.idea/._.gitignore
- DSSL/.idea/workspace.xml
- __MACOSX/DSSL/.idea/._workspace.xml
- DSSL/.idea/modules.xml
- __MACOSX/DSSL/.idea/._modules.xml
- DSSL/.idea/DSSL.iml
- __MACOSX/DSSL/.idea/._DSSL.iml
- DSSL/.idea/misc.xml
- __MACOSX/DSSL/.idea/._misc.xml
- __MACOSX/DSSL/._.idea
- __MACOSX/._DSSL
