# Supplementary material
Source: ML conference proceedings conference paper supplement (https://proceedings.neurips.cc/paper_files/paper/2022/hash/040c816286b3844fd78f2124eec75f2e-Abstract.html)
Supplement: Supplementary file 1 [file 040c816286b3844fd78f2124eec75f2e-Supplemental-Conference.zip › DSSL/DSSL/data/Planetoid/Cora/raw/cora.cites]

35	1033
35	103482
35	103515
35	1050679
35	1103960
35	1103985
35	1109199
35	1112911
35	1113438
35	1113831
35	1114331
35	1117476
35	1119505
35	1119708
35	1120431
35	1123756
35	1125386
35	1127430
35	1127913
35	1128204
35	1128227
35	1128314
35	1128453
35	1128945
35	1128959
35	1128985
35	1129018
35	1129027
35	1129573
35	1129683
35	1129778
35	1130847
35	1130856
35	1131116
35	1131360
35	1131557
35	1131752
35	1133196
35	1133338
35	1136814
35	1137466
35	1152421
35	1152508
35	1153065
35	1153280
35	1153577
35	1153853
35	1153943
35	1154176
35	1154459
35	116552
35	12576
35	128540
35	132806
35	135130
35	141342
35	141347
35	148170
35	15670
35	1688
35	175291
35	178727
35	18582
35	190697
35	190706
35	1956
35	197054
35	198443
35	198653
35	206371
35	210871
35	229635
35	231249
35	248425
35	249421
35	254923
35	259701
35	259702
35	263279
35	263498
35	265203
35	273152
35	27510
35	28290
35	286500
35	287787
35	28851
35	289779
35	289780
35	289781
35	307015
35	335733
35	33904
35	33907
35	35061
35	38205
35	387795
35	415693
35	41714
35	427606
35	44368
35	45599
35	46079
35	46431
35	486840
35	48766
35	503883
35	503893
35	513189
35	54129
35	54131
35	56119
35	561238
35	568857
35	573964
35	573978
35	574009
35	574264
35	574462
35	575077
35	575292
35	575331
35	576725
35	576795
35	577227
35	578780
35	579008
35	592973
35	593091
35	593105
35	593240
35	593260
35	593813
35	594047
35	594543
35	594649
35	594900
35	608326
35	634902
35	634904
35	634938
35	634975
35	640617
35	646809
35	646837
35	647408
35	647447
35	66556
35	66563
35	66805
35	69284
35	69296
35	694759
35	735303
35	78511
35	787016
35	801170
35	81722
35	82098
35	84021
35	85352
35	86359
35	8865
35	887
35	97645
35	98698
40	1109017
40	1114442
40	116552
114	1103315
114	1105394
114	1106112
114	1106172
114	1106406
114	1107455
114	1111052
114	1114125
114	1117942
114	1118245
114	1118332
114	1120170
114	1126029
114	124064
114	128
114	130
114	136665
114	191404
114	193742
114	23258
114	28227
114	28287
114	28350
114	28387
114	28471
114	28485
114	341188
114	38480
114	39403
114	434
114	55968
114	58540
114	6155
114	6170
114	6196
114	6220
114	64484
114	7432
114	755217
114	8213
114	91975
114	976334
117	1109581
117	149669
117	17476
117	189708
117	206259
117	28202
117	28278
117	28387
117	28471
117	32872
117	33013
117	341188
117	38480
117	39403
117	6170
117	6214
117	75674
128	1114125
128	20526
128	39403
128	91975
130	13960
130	345340
130	39403
288	1118092
288	36167
424	1135125
424	218666
424	47684
434	267003
463	58454
504	1102364
504	1112650
504	506
504	89416
506	1102364
506	1106546
506	89416
887	10796
887	1105033
887	1111304
887	1112911
887	1113614
887	114308
887	12576
887	134128
887	161221
887	170798
887	17476
887	19045
887	20972
887	265203
887	28456
887	299195
887	299197
887	334153
887	35490
887	38205
887	595056
887	6151
887	6213
887	6215
887	64519
887	87363
887	976334
906	1103979
906	1105344
906	1114352
906	1136397
906	1140040
906	34355
906	910
910	1104379
910	1105344
910	1105530
910	1108834
910	1110520
910	1114118
910	1116569
910	1118848
910	1120858
910	1122460
910	1126044
910	1129111
910	1135137
910	1140040
910	1152194
910	12439
910	12946
910	131042
910	13136
910	160705
910	227286
910	242637
910	28278
910	31043
910	340075
910	340078
910	34355
910	35905
910	42847
910	436796
910	48550
910	5462
910	576257
910	58552
910	5869
910	636511
910	67292
910	675649
910	684372
910	755217
910	94953
936	1107010
936	1111899
936	129558
936	1956
936	207395
936	3084
936	3828
936	38845
940	20180
940	28265
940	3828
941	129558
941	20180
941	28265
941	3828
941	940
943	1152896
943	3828
943	91852
1026	1034
1026	1102550
1026	1105231
1026	1129798
1026	1153945
1033	1034
1033	1107062
1034	1153945
1035	1034
1035	1107062
1035	1110515
1213	1154525
1213	409725
1213	8766
1237	102938
1237	1102400
1237	1106112
1237	143676
1246	1102400
1246	1104007
1246	42207
1246	57764
1246	6125
1272	1102625
1272	1108167
1272	1120962
1272	112378
1272	1123867
1272	1128256
1272	1129208
1272	1135125
1272	1135358
1272	157805
1272	18615
1272	192734
1272	20593
1272	254923
1272	27230
1272	284414
1272	30895
1272	30901
1272	444240
1272	520471
1272	52835
1272	552469
1272	560936
1272	591016
1272	636098
1272	65653
1272	6917
1272	6923
1272	85452
1272	85688
1272	93923
1272	97892
1365	1031453
1365	1102407
1365	1105062
1365	1106287
1365	1108050
1365	1110494
1365	1110998
1365	1113995
1365	1114153
1365	1114352
1365	1114388
1365	1114605
1365	1116347
1365	1116594
1365	1117653
1365	1119140
1365	1120211
1365	1120866
1365	1128839
1365	1129443
1365	1130600
1365	1131647
1365	1131745
1365	1131748
1365	1132922
1365	1132968
1365	1135137
1365	1135368
1365	1136422
1365	1136442
1365	1152143
1365	1152821
1365	1154169
1365	120084
1365	139865
1365	157401
1365	161221
1365	171225
1365	184918
1365	188318
1365	188471
1365	22835
1365	23448
1365	23502
1365	23507
1365	237521
1365	26850
1365	330148
1365	340075
1365	340299
1365	39904
1365	436796
1365	49482
1365	560936
1365	562123
1365	628500
1365	648232
1365	649731
1365	69392
1365	7276
1365	7297
1365	77758
1365	782486
1365	83826
1365	85299
1365	853150
1365	90888
1365	93555
1365	948299
1365	948846
1365	949318
1365	949511
1365	950052
1365	950305
1481	1102567
1481	1106052
1481	1108267
1481	1111614
1481	1113934
1481	1114864
1481	1117184
1481	1119295
1481	1120563
1481	1153891
1481	13960
1481	200480
1481	399173
1481	4878
1481	521207
1481	521269
1688	1103985
1688	1131360
1688	1133338
1688	1134022
1688	1136814
1688	1153065
1688	152483
1688	1694
1688	39474
1688	44368
1688	576725
1688	647413
1688	69284
1688	694759
1688	84021
1694	39474
1717	1115291
1717	1116336
1717	1135108
1717	50381
1717	733167
1786	35797
1817	1114502
1919	1108389
1919	1109581
1949	129042
1949	3101
1951	3095
1952	1107215
1952	1111899
1952	1949
1952	3101
1953	1153166
1953	1153724
1953	1153728
1953	1949
1955	110163
1955	1110390
1955	1125386
1955	1956
1956	101143
1956	1111899
1956	1118302
1956	1153101
1956	1153150
1956	1817
1956	263486
1956	83449
1959	101143
1959	1152896
1959	1153728
1959	170798
1959	207395
1959	3097
1959	310530
1959	38839
1959	73327
1959	82664
1997	1102442
1997	1108551
1997	1109439
1997	1109542
1997	129897
1997	154982
1997	3233
1997	49811
1997	7032
1999	1102442
1999	1123068
1999	1131471
1999	39126
1999	6771
2354	10186
2354	1107140
2354	1113852
2354	1130539
2354	154134
2354	40151
2354	74749
2440	1000012
2440	1061127
2440	1106388
2440	1107095
2440	1108551
2440	1110426
2440	1114512
2440	1117786
2440	1119295
2440	1120650
2440	1127619
2440	1153254
2440	136766
2440	136768
2440	151430
2440	18615
2440	212777
2440	23546
2440	27230
2440	49811
2440	49843
2440	49844
2440	49847
2440	582343
2440	591016
2440	591017
2440	63931
2440	6917
2440	6923
2440	72908
2653	102406
2653	107177
2653	1104055
2653	1116268
2653	1116842
2653	1118764
2653	1119751
2653	1152075
2653	167656
2653	175291
2653	197783
2653	28641
2653	321861
2653	350362
2653	4660
2653	59045
2653	6125
2653	65650
2654	1104851
2654	1106630
2654	1107861
2654	1110438
2654	1116842
2654	1121867
2654	1123926
2654	1152075
2654	197783
2654	211906
2654	27250
2654	463825
2654	52784
2658	1115375
2658	1130676
2658	1130808
2658	1131607
2658	1132948
2658	1135899
2658	1140230
2658	230884
2658	236759
2658	282700
2658	395540
2658	578347
2658	696342
2658	696345
2658	696346
2658	751408
2658	99023
2663	1119671
2665	1105574
2665	1113035
2665	1115375
2665	1122704
2665	1130676
2665	1130808
2665	1131607
2665	1132486
2665	1132948
2665	1132968
2665	205192
2665	230884
2665	237489
2665	2658
2665	395540
2665	43639
2665	578306
2665	578309
2665	578337
2665	578347
2665	582139
2665	630817
2665	631052
2665	696345
2665	696346
2665	751408
2665	763009
2665	99023
2695	1108169
2695	1120197
2695	2698
2695	342802
2696	1108050
2696	1108169
2696	1113035
2696	1114192
2696	1118083
2696	1120858
2696	1123239
2696	1133004
2696	160705
2696	256106
2696	2695
2696	2698
2696	342802
2696	469504
2696	5348
2696	5869
2696	99025
2698	1114192
2698	256106
2698	2695
2698	342802
2698	99025
2702	1120777
2702	12330
2702	395553
2702	72056
3084	1107171
3084	255233
3084	33303
3085	15889
3085	221302
3085	30973
3085	395725
3085	5062
3085	83449
3095	110162
3095	110163
3095	218682
3095	83449
3097	1106236
3097	129045
3097	1949
3097	1952
3097	3101
3101	110162
3101	110163
3101	110164
3101	70441
3112	103529
3112	110163
3112	110164
3112	1152564
3112	1949
3112	470511
3112	77826
3112	77829
3187	1110000
3187	129896
3187	129897
3187	280876
3187	5086
3191	105865
3191	1106789
3191	1127530
3191	1131267
3191	129896
3191	129897
3191	137873
3191	162664
3191	308920
3191	310742
3191	3192
3191	423463
3191	5086
3191	561364
3191	642827
3192	105865
3192	129896
3192	310742
3192	3191
3192	423463
3192	5086
3192	561364
3192	642827
3217	1000012
3217	167670
3217	238099
3217	65653
3217	86840
3218	1106492
3218	1110426
3218	1119987
3218	1120169
3218	1152290
3218	1153264
3218	187354
3218	277263
3218	35070
3218	417017
3218	49843
3218	6639
3218	66782
3218	6767
3218	6941
3220	1115677
3220	1125992
3220	1128430
3220	1130634
3220	1131728
3220	1132706
3220	120039
3220	145215
3220	167670
3220	346243
3220	36620
3220	39124
3220	40922
3220	429805
3220	654177
3220	69397
3220	8832
3222	1103737
3222	1114222
3222	1131137
3222	1132157
3222	167656
3222	964248
3223	1132157
3223	1153101
3223	1153150
3223	167656
3223	167670
3229	100197
3229	1050679
3229	1103960
3229	1105718
3229	1106568
3229	1108209
3229	1108834
3229	1109392
3229	1112767
3229	1125082
3229	1125895
3229	1126037
3229	1128839
3229	1128868
3229	1130915
3229	1130927
3229	1130931
3229	1131647
3229	1131748
3229	1132418
3229	1140289
3229	1152277
3229	1152673
3229	1154169
3229	1154251
3229	118559
3229	133550
3229	157401
3229	16461
3229	189577
3229	23502
3229	25181
3229	25184
3229	27174
3229	27631
3229	31769
3229	33412
3229	35343
3229	35863
3229	35922
3229	390922
3229	396412
3229	444191
3229	447250
3229	48550
3229	49482
3229	52515
3229	62347
3229	641976
3229	654326
3229	7022
3229	72101
3229	82087
3229	82098
3229	83826
3229	90888
3229	919885
3229	92065
3229	948299
3229	949511
3229	96335
3231	104840
3231	1102761
3231	1106330
3231	1106370
3231	1107067
3231	1113926
3231	1115471
3231	1125386
3231	1128536
3231	1131471
3231	1153169
3231	167670
3231	180399
3231	200480
3231	20850
3231	25184
3231	259126
3231	263279
3231	3237
3231	328370
3231	39124
3231	39126
3231	46431
3231	49660
3231	6334
3231	63477
3231	63486
3231	636098
3231	66594
3231	68463
3231	8699
3231	8821
3232	1106330
3232	1123068
3232	1128536
3232	20850
3232	20942
3232	521251
3232	66594
3233	1103737
3233	1114222
3233	1125467
3233	192850
3233	1997
3233	272720
3233	509379
3233	66594
3233	976284
3235	1114222
3235	65653
3236	1125467
3236	167670
3236	3233
3236	3237
3236	601561
3237	964248
3240	1110531
3240	1131137
3240	3233
3240	36620
3240	39130
3240	964248
3243	1103610
3243	1104055
3243	1110947
3243	1113739
3243	307336
3243	30895
3243	30901
3243	31932
3243	350362
3243	368431
3243	854434
3243	96335
3828	1152896
3828	1956
3828	207395
3828	310530
3932	5075
4274	1105428
4274	1114664
4274	1119078
4329	105899
4329	1110768
4329	1111304
4329	28254
4329	395547
4329	46468
4329	510718
4330	1103676
4330	1103737
4330	1104449
4330	1108834
4330	11093
4330	1109439
4330	1110438
4330	1112929
4330	1114352
4330	1132459
4330	1132461
4330	1135108
4330	1136393
4330	1136397
4330	1152917
4330	118436
4330	119956
4330	120013
4330	12946
4330	137873
4330	151708
4330	168410
4330	1717
4330	299197
4330	32688
4330	328370
4330	35797
4330	37884
4330	390889
4330	395553
4330	428610
4330	4329
4330	46468
4330	684986
4330	69392
4330	69418
4330	753265
4330	949217
4335	1104300
4335	1121254
4335	1136310
4335	1136397
4335	1140547
4335	116790
4335	1717
4335	239800
4335	32698
4335	35922
4335	390889
4335	46468
4335	62274
4335	62417
4335	755082
4335	95718
4553	1102548
4584	1031453
4584	1102550
4584	1113739
4584	1116347
4584	1120020
4584	1128839
4584	1130567
4584	1130600
4584	124064
4584	1272
4584	128
4584	132806
4584	13885
4584	13917
4584	168410
4584	188471
4584	193742
4584	28278
4584	28287
4584	293285
4584	36167
4584	6151
4584	6155
4584	6184
4584	6196
4584	6210
4584	6213
4584	6214
4584	628500
4584	628815
4584	782486
4584	976334
4637	164
4649	1105887
4649	1127851
4649	135765
4649	135766
4649	411092
4649	434
4649	449841
4649	6917
4649	8703
4660	18615
4660	429781
4660	5038
4660	582343
4804	102884
4804	1108175
4804	1112574
4804	1153262
4804	12182
4804	12210
4804	157761
4804	164
4804	25805
4804	45189
4804	68505
4804	77515
4804	976284
4804	989397
4878	1102567
4983	7867
5055	1104851
5055	1107861
5055	1119751
5055	1121867
5055	129897
5055	167656
5062	1120563
5062	28026
5062	5064
5062	5069
5062	521207
5064	1120563
5064	1121176
5064	1129106
5064	272345
5064	28026
5064	385067
5064	5069
5069	1120563
5069	385067
5069	5064
5075	1120563
5075	5064
5075	5069
5086	109323
5086	1105698
5086	129896
5086	137849
5086	3187
5086	3191
5086	354004
5086	423463
5086	440815
5086	561364
5086	79809
5194	1152714
5194	133550
5194	133563
5194	133566
5194	140569
5348	1108050
5348	1114192
5348	1118083
5348	1120197
5348	1120858
5348	1123239
5348	1132968
5348	139547
5348	256106
5348	2695
5348	2696
5348	342802
5348	75695
5348	911198
5348	99025
5454	1105574
5454	1128425
5454	1130680
5462	1129111
5462	119956
5462	227286
5462	910
5600	1022969
5600	1117833
5600	255233
5600	33303
5600	77826
5869	1110520
5869	910
5959	1102625
5959	152226
5959	545647
5959	582511
5966	1102625
5966	1106388
5966	1107861
5966	1110390
5966	1114502
5966	68463
5966	86840
5966	8699
6125	1107572
6125	12211
6125	27612
6125	28641
6125	385251
6130	1132461
6130	1154123
6130	1154124
6130	671269
6130	675847
6151	1106547
6151	1107355
6151	1130567
6151	1385
6151	193742
6151	6152
6151	6155
6151	6213
6151	6214
6152	299195
6155	1126029
6163	1106966
6163	1111052
6163	1113739
6163	130
6163	134128
6163	20534
6163	28202
6163	96847
6169	1106406
6169	1114629
6169	1130567
6169	170338
6169	20526
6169	7419
6184	10981
6184	1105718
6184	1120731
6184	1136422
6184	13686
6184	27631
6184	3229
6184	399339
6196	1120731
6196	1153056
6196	28387
6196	58540
6196	81350
6196	976334
6209	1108329
6209	118259
6209	118260
6209	168410
6209	181782
6209	212930
6209	28485
6209	38480
6209	8213
6209	8875
6209	95579
6210	1120731
6213	10796
6213	1103315
6213	1105764
6213	1106406
6213	1106547
6213	1106966
6213	1107355
6213	1107455
6213	1108329
6213	1109957
6213	1111052
6213	1111230
6213	1111304
6213	1113182
6213	1113459
6213	1113614
6213	1116347
6213	1117760
6213	1117942
6213	1120020
6213	1122425
6213	1123553
6213	1128267
6213	1129096
6213	1129243
6213	1130567
6213	124064
6213	12576
6213	128
6213	13193
6213	134128
6213	1385
6213	13960
6213	153598
6213	161221
6213	17208
6213	193742
6213	195361
6213	20526
6213	20534
6213	218410
6213	23774
6213	241133
6213	28202
6213	28227
6213	28278
6213	28350
6213	28471
6213	28485
6213	293271
6213	299195
6213	299197
6213	353541
6213	35863
6213	38480
6213	399339
6213	434
6213	55968
6213	58540
6213	595056
6213	6151
6213	6155
6213	6163
6213	6184
6213	6210
6213	6214
6213	6215
6213	6220
6213	6224
6213	628667
6213	628668
6213	628815
6213	672064
6213	7419
6213	755217
6213	91975
6214	1105764
6214	1106172
6214	1109199
6214	1115886
6214	1126029
6214	1130600
6214	1152740
6214	124064
6214	13960
6214	149669
6214	188471
6214	23258
6214	27631
6214	28278
6214	28447
6214	345340
6214	38480
6214	399339
6214	6155
6214	6184
6214	6196
6214	6215
6214	6224
6214	628500
6214	6378
6214	93320
6214	95589
6214	97892
6215	1120170
6215	6224
6216	1113739
6216	1116347
6216	1123553
6216	230300
6216	96847
6216	976334
6220	134128
6220	6163
6220	6224
6224	28387
6224	345340
6224	6163
6238	10793
6238	1123991
6238	1130356
6238	84459
6311	1114864
6311	1115677
6311	235776
6311	69397
6318	1108656
6318	1119295
6318	1121057
6318	20833
6334	1107067
6334	1116268
6334	1152307
6334	1152448
6334	1152975
6334	1153169
6334	1153703
6334	200480
6334	20850
6334	3231
6334	444240
6334	46431
6334	68463
6343	1125992
6343	141868
6343	200480
6343	359067
6343	521252
6344	1112665
6344	200480
6346	1106103
6346	1112075
6378	1122425
6378	1129208
6378	28473
6385	1103162
6385	1129243
6385	17476
6385	28473
6385	55968
6385	6378
6385	682666
6385	892139
6539	1102646
6639	116084
6639	178209
6639	568045
6639	591017
6741	1130637
6741	1153160
6741	348437
6741	411092
6741	417017
6741	49895
6741	51909
6741	83725
6741	9708
6767	1106103
6767	1114864
6767	1120444
6767	235776
6767	6334
6767	6925
6767	69397
6771	65653
6775	1111240
6775	350319
6782	1123068
6782	463825
6784	100961
6784	1116629
6784	350319
6784	35797
6784	560936
6784	562123
6784	60170
6784	6775
6786	1106789
6786	714975
6814	1117348
6814	1125469
6814	158172
6814	293974
6814	300071
6814	315266
6814	37884
6814	390896
6814	445938
6818	1105531
6818	1121254
6818	1128425
6818	293974
6818	37884
6818	390896
6818	50336
6818	50337
6898	1123188
6898	124224
6898	12631
6898	431206
6898	6910
6898	78994
6910	1117219
6910	1123188
6910	1132083
6910	1152150
6910	1154103
6910	169279
6910	263553
6910	431206
6910	662416
6913	1105011
6913	1116336
6913	1131230
6913	1135108
6913	1152917
6913	1717
6913	428610
6913	431206
6913	4330
6913	703953
6917	1153811
6917	449841
6923	1155073
6923	187354
6923	20857
6923	308003
6923	6941
6923	93923
6925	1114526
6925	1118658
6925	372862
6925	57922
6925	57948
6935	1000012
6935	101660
6935	1106388
6935	1115670
6935	1120650
6935	18615
6935	238099
6935	308003
6939	1116922
6941	372862
7032	1109439
7032	1110438
7032	137873
7032	323128
7032	52847
7041	1120880
7047	1135082
7047	14549
7047	212930
7047	2663
7047	54844
7272	1136446
7272	7276
7272	7297
7272	763181
7276	763181
7296	763181
7297	7276
7297	763010
7297	763181
7419	1105764
7419	1107312
7419	1109581
7419	1113182
7419	1117760
7419	1118245
7419	341188
7430	1153287
7430	95586
7532	1121603
7532	1153097
7532	141171
7532	314459
7532	7537
7532	80515
7537	1113534
7537	1131348
7537	1153097
7537	141171
7537	314459
7537	409255
7537	7532
7867	1138027
7867	315789
8079	105057
8079	1103737
8079	1121867
8079	154982
8079	192850
8079	27250
8079	39124
8224	1108728
8224	1110426
8224	1111788
8224	1128531
8224	1132815
8224	11342
8224	1153148
8224	1153866
8224	133615
8224	22431
8224	22563
8224	23738
8224	263279
8224	30895
8224	368431
8224	49843
8224	49844
8224	49847
8224	55403
8224	601567
8224	62389
8224	6311
8224	65653
8224	6639
8224	97377
8581	1120059
8581	1132968
8581	2665
8581	75691
8581	75695
8591	1154525
8591	137956
8591	167205
8591	709113
8594	1132809
8594	1154525
8594	1213
8594	180187
8594	232605
8594	58268
8594	709113
8594	8591
8617	1116268
8617	12359
8617	175291
8617	36145
8617	52784
8619	175291
8619	36145
8687	1102751
8687	38000
8696	104840
8696	1102751
8699	104840
8699	1102751
8703	101145
8703	104840
8703	1102751
8703	1105428
8703	1119078
8703	173884
8703	27535
8703	308232
8703	353541
8703	434
8703	502574
8703	51866
8703	51909
8703	59244
8703	89335
8766	409725
8821	1102761
8821	1153811
8832	1102761
8865	103515
8865	1129570
8865	395075
8865	608292
8865	647408
8865	785678
8865	8875
8872	1104647
8872	1125092
8872	1152761
8872	1153860
8872	197054
8872	229635
8872	395075
8872	8875
8874	1120643
8874	1153816
8874	395075
8874	608292
8874	646809
8874	647447
8874	8875
8875	1129570
8875	1152676
8875	18582
8875	395075
8875	608292
8961	1103610
8961	1133390
9513	102879
9515	102879
9515	4804
9515	9513
9559	1102794
9559	252725
9581	1130780
9581	633585
9586	1120138
9586	33818
9708	1130539
9708	1153003
9708	136766
9708	136768
9708	181782
9716	1153262
9716	28674
9716	6539
10169	1107067
10169	1123867
10169	114189
10169	158614
10169	17798
10169	20850
10169	211875
10169	259126
10169	3231
10169	39126
10169	39131
10169	49660
10169	552469
10169	6334
10169	63477
10169	63486
10169	636098
10169	711598
10169	85452
10174	10186
10177	10169
10177	1112574
10177	12197
10177	12198
10177	12210
10177	124734
10177	15429
10177	164
10177	249858
10177	27606
10177	4804
10177	67415
10177	68495
10177	68505
10177	9515
10183	10186
10183	10430
10183	1108267
10183	1110947
10183	1114336
10183	1120713
10183	259772
10183	47570
10183	54550
10183	6378
10186	86840
10430	1120713
10430	3095
10435	1103394
10435	112378
10435	208345
10435	22566
10435	41417
10435	8703
10531	1102850
10531	1107567
10531	1129442
10531	1130634
10531	194617
10531	31336
10531	31349
10531	31353
10531	36620
10531	43698
10531	686532
10796	1110947
10796	1113934
10796	1135358
10796	1153148
10796	180373
10796	20942
10796	30895
10796	31097
10796	417017
10796	46536
10796	601567
10796	6217
10796	8699
10796	93320
10798	10183
10798	10796
10798	1154500
10798	18619
10798	20193
10798	212777
10798	252715
10798	434
10798	601561
10798	8703
10798	97892
10981	1102873
10981	23507
11093	39199
11148	1129835
11148	1131719
11148	193354
11148	25413
11326	11339
11335	1127657
11335	11325
11335	1153264
11335	20833
11335	217139
11335	35070
11335	49843
11335	545647
11335	582511
11337	1128256
11339	11326
11339	211432
11339	30901
11339	44017
11339	45061
11342	463825
11342	65650
11342	79809
12155	1126350
12158	12199
12158	148399
12165	1107567
12165	1112099
12169	1119471
12169	4637
12169	989397
12182	1059953
12182	1106418
12182	1117249
12182	1118764
12182	1153183
12182	12165
12182	12211
12182	155736
12182	157761
12182	219239
12182	28632
12182	28640
12182	28641
12182	309476
12182	321861
12182	429781
12182	4660
12182	5038
12182	65650
12182	94713
12194	27199
12195	1107319
12195	1107567
12195	1112099
12195	1131611
12195	1132285
12195	12165
12195	38722
12195	51180
12197	111866
12197	1119471
12197	68495
12198	1126350
12198	12158
12198	12199
12198	164
12198	27612
12198	95225
12199	1119471
12199	12247
12210	1112574
12210	12182
12210	4804
12210	57948
12210	6125
12210	67415
12210	77515
12211	12165
12238	101263
12238	1107567
12238	1112099
12238	12165
12247	1119471
12247	148399
12330	107569
12330	1120777
12330	1152490
12330	1153861
12330	156977
12330	213279
12330	395553
12330	400356
12330	949217
12337	1129683
12337	16451
12337	16470
12337	16474
12337	395725
12337	57764
12347	16451
12347	72101
12350	101811
12350	1104007
12350	1107319
12350	1131611
12350	12158
12350	12195
12350	12198
12350	12210
12350	152227
12350	157805
12350	16451
12350	20601
12350	20602
12350	27612
12350	4804
12350	6125
12350	6539
12350	67415
12350	68495
12359	1131634
12359	16451
12359	242637
12439	105057
12439	323128
12439	340078
12576	1071981
12576	1104999
12576	1105221
12576	1107674
12576	1129573
12576	127033
12576	135130
12576	229635
12576	28290
12576	416455
12576	56112
12576	56119
12576	56709
12576	574710
12576	575795
12576	62718
12576	63832
12576	83725
12576	8875
12631	1123188
12631	1152150
12631	1154103
12631	12638
12631	662416
12631	6898
12631	6910
12631	78994
12638	1123188
12638	119761
12638	263553
12638	4330
12638	662416
12638	6898
12638	6910
13024	899119
13136	1118083
13136	160705
13193	17208
13193	755217
13195	1107312
13195	1120731
13195	755217
13205	1105148
13205	13208
13208	1105148
13208	131318
13212	1105148
13212	131318
13212	13208
13212	170338
13212	214472
13212	358884
13212	411005
13213	1152143
13213	131318
13269	17476
13652	13654
13652	13656
13652	83746
13654	1115959
13654	119686
13654	83746
13654	987188
13656	1120431
13658	1115959
13658	1120431
13658	119686
13658	13656
13658	198443
13658	294239
13658	987188
13686	1107355
13686	1120431
13686	1272
13686	1385
13717	1110531
13717	37998
13717	38000
13885	1104379
13885	13917
13885	31043
13885	42847
13885	84459
13917	1120020
13966	13960
13972	1126050
13972	20534
13982	34979
14062	1119708
14062	1152358
14062	1152421
14062	1153280
14062	1154459
14062	141347
14062	33907
14062	44368
14062	646836
14062	97390
14062	98693
14083	1103016
14090	1103016
14090	643069
14428	1103031
14428	1103969
14428	14429
14428	14431
14428	34082
14428	73119
14429	1103031
14429	1103969
14429	1119216
14429	14431
14429	34082
14429	73119
14430	1103031
14430	1103969
14430	1119216
14430	14429
14430	14431
14430	34082
14430	73119
14431	1103031
14529	1103038
14529	1114864
14529	1119987
[truncated: 3,429 more rows]
