# Supplementary material
Source: ML conference proceedings conference paper supplement (https://proceedings.neurips.cc/paper_files/paper/2022/hash/040c816286b3844fd78f2124eec75f2e-Abstract.html)
Supplement: Supplementary file 1 [file 040c816286b3844fd78f2124eec75f2e-Supplemental-Conference.zip › DSSL/DSSL/data/twitch/citing.txt]

If you find this dataset useful in your research, please consider citing the following paper:

>@misc{rozemberczki2019multiscale,    
       title = {Multi-scale Attributed Node Embedding},   
       author = {Benedek Rozemberczki and Carl Allen and Rik Sarkar},   
       year = {2019},   
       eprint = {1909.13021},  
       archivePrefix = {arXiv},  
       primaryClass = {cs.LG}   
       }

And take a look at the project itself:

https://github.com/benedekrozemberczki/MUSAE
