# Supplementary material
Source: ML conference proceedings conference paper supplement (https://proceedings.neurips.cc/paper_files/paper/2022/hash/040c816286b3844fd78f2124eec75f2e-Abstract.html)
Supplement: Supplementary file 1 [file 040c816286b3844fd78f2124eec75f2e-Supplemental-Conference.zip › DSSL/DSSL/data/twitch/DE/musae_DE_edges.csv]

from	to
0	9206
0	7787
0	2145
0	2684
0	7275
0	2498
0	5358
1	5506
1	1753
1	4361
1	2984
1	8978
1	2900
1	9151
1	3193
1	6160
1	8209
1	5682
1	4992
1	7668
1	2058
1	3164
1	2560
1	6009
1	8040
1	8873
1	1578
1	116
1	4611
1	3247
1	9407
1	3776
1	9206
1	7787
1	4575
1	4248
1	7482
1	3996
1	2152
1	7593
2	1638
2	7720
2	421
2	1276
2	7496
2	7278
2	8366
2	2794
2	3363
2	7787
2	9080
2	5822
2	2980
2	3722
2	8287
2	8803
2	6535
2	2816
2	6480
3	6522
3	8608
4	1638
4	893
4	654
4	7685
4	4042
4	2498
4	2145
4	4313
4	7787
4	3384
4	460
4	7216
4	4927
7804	1901
7804	1638
7804	8747
7804	1355
7804	7787
7804	4461
7804	3633
7804	1150
7804	6164
7804	3177
7804	30
7804	798
7804	5458
7804	6119
7804	2816
7804	8334
6	9206
6	3828
6	7958
6	2684
6	8554
6	343
6	1550
7	570
8	8996
8	4038
8	8810
8	6522
8	1638
8	7787
8	9056
8	7125
8	6832
8	7296
8	342
8	4213
8	2998
8	3374
9	7787
9	5798
9	7565
9	130
10	6911
10	1354
10	2914
10	5351
10	9236
10	5759
10	8976
10	527
10	7281
9270	7720
9270	1354
9270	7913
9270	1283
9270	4590
9270	225
9270	2732
9270	2980
9270	82
9270	9029
9270	4300
9270	5058
9270	5846
9270	2364
9270	1625
9270	7968
9270	4530
9270	1184
9270	3421
9270	4313
9270	255
9270	3641
9270	4139
9270	8803
9270	6174
9270	1276
9270	2295
9270	9048
11	5379
11	4484
11	7516
11	5477
11	2549
11	2867
11	798
11	6540
11	3901
11	4408
11	510
11	8448
11	4847
11	7996
11	2268
11	2347
11	1101
11	3055
11	3555
11	9349
11	1402
11	5266
11	8252
11	674
11	4722
11	3221
11	3859
11	4500
11	6535
11	3634
11	1185
11	8798
11	3073
11	3534
11	2076
11	8801
11	7091
11	3430
11	6176
11	1629
11	326
11	5805
11	3999
11	850
11	7729
11	1211
11	6108
11	6204
11	2234
11	477
11	8421
11	5264
11	3163
11	4375
11	480
11	1926
11	7756
11	9158
11	6175
11	4818
11	9398
11	8630
11	933
11	3321
11	3741
11	5834
11	2973
11	1453
11	493
11	5976
11	8753
11	2957
11	2930
11	6190
11	5208
11	7127
11	5589
11	8123
11	5763
11	6191
12	395
13	5743
13	4457
13	2914
13	7092
13	397
13	4201
13	3603
13	7087
13	8099
13	1433
13	8750
13	4099
13	4993
13	1286
13	1291
3092	1901
3092	4034
3092	5358
3092	9037
3092	1792
3092	1320
3092	7685
3092	3872
3092	5907
3092	1638
3092	748
3092	1988
3092	7055
3092	7286
3092	2381
3092	5057
3092	8287
3092	3178
3092	4377
3092	2998
3092	6154
3092	755
3092	4530
3092	6047
3092	5565
3092	64
3092	9423
3092	5033
3092	9206
3092	7787
3092	5846
3092	6652
3092	5408
3092	5893
3092	5181
16	3722
16	721
16	7278
16	2481
16	4042
16	3126
16	8803
16	7216
16	5846
16	2998
16	5849
16	7849
16	2636
16	898
16	7011
16	8386
16	7787
16	4315
16	6652
16	4068
16	1276
16	8769
16	9048
16	1638
16	7047
16	2019
16	5904
16	7733
16	4957
16	5667
16	3336
16	4348
16	3520
16	2092
16	7968
16	128
16	3378
16	3751
16	2533
16	6905
16	4823
16	5974
16	4320
16	4899
16	9481
16	2816
16	4253
16	3115
18	5918
18	343
19	209
19	6357
19	7820
19	2169
19	6522
19	7561
19	9390
19	8725
19	8611
19	8273
19	2420
20	4473
20	6152
20	2878
21	293
21	3326
21	738
21	5467
21	4038
21	5781
21	4918
21	3900
21	744
21	1027
21	1713
21	3617
21	154
21	7585
21	1538
21	7301
21	2353
21	2356
21	2202
21	7617
21	2464
21	1771
21	9335
21	4501
21	2048
21	8538
21	4788
21	2209
21	2121
21	3494
21	5494
21	3215
21	3793
21	6652
21	2366
21	3080
21	5358
21	3223
21	4220
21	2516
21	1061
21	9058
21	1638
21	9163
21	3367
21	2839
21	4811
21	7844
21	4348
21	5667
21	7039
21	8301
21	608
21	7235
21	1072
21	7968
21	2666
21	7493
21	4336
21	2533
21	5527
21	3822
21	5382
21	9080
21	8924
21	355
21	2813
21	5686
21	6250
21	2816
21	8723
21	7150
21	657
21	5253
21	82
21	1703
21	7840
21	7077
21	2929
21	8782
21	3734
21	4720
21	821
21	3711
21	4721
21	523
21	5854
21	430
21	7853
21	7998
21	2946
21	7707
21	2851
21	7317
21	8632
21	8803
21	7011
21	3292
21	1276
21	5723
21	9137
21	5613
21	9142
21	5573
21	7727
21	9223
21	854
21	3894
21	2733
21	8197
21	9241
21	4722
21	3589
21	1876
21	4452
21	6863
21	3751
21	7496
21	7229
21	2753
21	5893
21	2033
21	7649
21	6366
21	2107
21	5712
21	5884
21	7127
21	6931
21	8493
21	5568
21	5898
21	7130
21	6835
21	8558
21	6690
6167	8753
6167	7787
6167	2145
6167	4548
6167	6418
6167	2914
6167	9206
6167	4004
6167	5421
6167	5358
6167	7524
23	3061
23	7359
23	721
23	2277
23	2899
23	877
23	5421
23	48
23	8299
23	4591
23	8262
23	2349
23	8143
23	8872
24	8425
24	7820
24	7666
24	3032
24	4042
24	3173
24	4008
24	4312
24	8753
24	7787
24	2145
24	4248
24	8803
24	4139
24	3722
24	1874
25	8537
25	7604
25	2461
25	7638
25	6991
25	9115
25	3530
25	7794
25	7264
25	7750
25	8486
25	728
25	2603
25	2892
25	7350
27	2476
27	582
27	3477
27	8363
27	8531
27	3964
27	5767
27	1596
27	1322
27	8700
27	1897
27	2906
27	5331
27	4538
27	3203
27	5776
27	4673
27	4985
27	8979
27	5338
27	2064
27	4751
27	1613
27	318
27	8827
27	3069
27	2499
27	1931
27	9360
27	1887
27	6571
27	1490
27	617
27	5943
27	1626
27	8889
27	9096
27	5358
27	5719
27	3085
27	4519
27	2437
27	2234
27	189
27	3234
27	2235
27	2550
27	3945
27	7967
27	8723
27	4528
27	2805
27	7158
27	3376
27	2294
27	3529
27	8285
27	9133
27	8753
27	3789
27	5020
27	1871
27	8411
27	3962
27	8935
27	3838
27	3173
27	6909
27	164
27	6619
27	7208
27	8610
27	2417
27	2557
27	7504
27	513
27	3703
27	8451
27	9105
27	4267
27	2275
27	1969
27	3979
27	4238
27	7372
27	4560
27	7398
27	4133
27	2996
27	4315
27	2274
27	4576
27	5572
27	3131
27	1819
27	9266
27	9321
27	6334
27	5652
27	7697
27	8807
27	9078
27	4918
27	707
27	1285
27	6418
27	4446
27	8661
27	226
27	7250
27	6505
27	1642
27	8927
27	2872
27	7764
27	7631
27	6252
27	560
27	6817
27	188
27	4458
27	7416
27	5893
27	2264
27	2880
27	2881
27	1306
27	1010
27	2289
27	2474
27	3458
27	3514
27	5988
27	3460
27	9496
27	2333
28	7787
28	2696
28	1363
28	5508
28	5775
28	2816
160	3080
160	2302
160	266
160	1173
160	7958
160	2684
160	4298
160	8972
160	4004
160	419
160	1402
160	3948
160	8776
160	4995
160	6475
160	6011
160	3168
160	5346
160	8554
160	3828
160	3787
160	9206
160	7787
160	9285
160	6904
160	3771
160	1478
31	4929
31	4837
31	3804
31	5417
31	5522
31	4890
31	1115
31	5047
31	4821
31	8262
31	5019
31	5633
31	1615
1554	1499
1554	1664
1554	2914
1554	918
1554	7524
1554	7525
1554	631
1554	5838
1554	3587
1554	6840
1554	1761
1554	1763
1554	5925
1554	9354
1554	5815
1554	1376
1554	4006
1554	9484
1554	116
1554	5893
1554	5421
1554	6212
1554	8262
1554	2747
1554	4533
1554	7264
33	789
33	7787
33	2684
33	130
33	9206
34	1901
34	5927
34	2914
34	3822
34	4885
34	4547
34	5954
34	7900
34	7634
35	7968
35	2816
35	5561
35	2759
35	898
35	6989
35	6220
35	8554
35	7913
35	7011
35	5667
35	7787
35	7127
35	8493
35	5686
35	4348
35	8694
35	6652
36	4385
36	1277
36	5260
36	8740
36	8836
36	4547
36	5893
36	5640
36	390
36	3198
36	7787
36	9360
36	8250
36	7286
36	9288
36	7849
36	1276
36	4740
37	9206
38	1638
38	2474
38	2914
38	7900
39	4080
39	2034
39	3117
39	364
39	8531
39	3692
39	8810
39	9212
39	1638
39	5307
39	8030
39	3234
39	9391
39	304
39	1745
39	3341
39	755
39	721
39	7458
39	8862
39	2286
39	803
39	8262
39	2733
39	6652
39	8803
39	7510
39	2816
39	5865
39	6334
39	4215
40	1638
40	8787
40	9143
40	3023
40	5178
40	4042
40	2716
40	1584
40	8753
40	5474
40	2145
40	2258
40	2234
40	3234
40	617
40	5203
40	5293
40	5342
40	7775
41	7787
42	3811
42	8528
42	4038
42	7297
42	2481
42	8769
42	3551
42	257
42	3052
42	4571
42	1550
42	6854
42	4927
42	2492
42	7276
42	7454
42	1045
42	7301
42	7787
42	8803
42	6174
42	9440
42	7537
42	777
42	8498
42	7958
42	1436
42	269
42	7309
42	9197
42	8271
42	3096
42	3311
42	3023
42	1883
42	8589
42	2032
42	1986
42	1080
42	7665
42	8298
42	9331
42	8614
42	5687
42	7980
43	700
43	4406
43	4547
43	4918
43	5187
43	7988
43	7802
43	3088
43	309
43	8614
43	2285
43	8987
43	6845
43	8700
43	4451
43	6935
43	2804
43	4754
43	8789
43	7782
43	5797
43	5204
43	8753
43	7787
43	3603
43	4136
43	1096
43	6728
43	3143
44	7787
44	5358
44	178
45	5768
45	6212
46	1832
46	4555
46	8171
46	2458
46	2791
46	4742
46	7571
46	8949
46	8950
46	450
46	2063
46	1926
46	7878
46	8038
46	3061
46	6925
46	6359
46	5930
46	3072
46	2067
46	3172
46	2206
46	9403
46	3317
46	1850
46	459
46	1933
46	3271
46	3457
46	116
46	5597
46	1706
7922	6643
7922	7374
7922	6696
7922	5961
7922	368
7922	2436
47	6615
47	4038
47	2914
47	7720
47	4042
47	3804
47	1638
47	267
47	8614
47	1070
47	4927
47	6041
47	6925
47	4996
47	7216
47	2498
47	2630
47	7975
47	7787
47	2145
47	8230
47	9057
47	2813
47	5078
48	6041
48	8012
48	990
48	2899
48	2794
48	449
48	3301
48	8155
48	877
49	9206
49	5340
50	2083
50	6073
50	8460
50	3205
50	3234
50	4780
51	3080
51	6878
51	5388
51	7924
51	4038
51	9050
51	6931
51	2284
51	2919
51	2209
51	2744
51	621
51	1771
51	4004
51	8301
51	1624
51	9086
51	4280
52	8127
52	2481
52	7920
52	9320
52	8225
52	8366
52	6849
52	8468
52	6025
52	4533
53	1289
54	3502
54	7787
55	1766
55	7275
55	4128
55	2564
55	5178
55	6091
55	6426
55	9203
55	1584
55	1736
55	7787
55	2684
55	4298
55	9057
55	8301
55	2894
55	3352
55	4927
55	2998
55	4912
56	2914
56	7278
56	5117
56	7743
56	1638
56	7769
56	5667
56	8992
56	8782
56	6041
56	7867
56	7913
56	5846
56	5893
56	6522
56	5974
56	9206
56	8262
56	2498
56	4139
56	8803
56	8468
56	1276
57	6878
57	7047
57	1660
57	8554
57	847
57	65
57	4133
57	9340
57	8753
57	2362
57	2684
57	764
57	2839
57	430
57	6835
57	7787
58	6911
58	9258
58	9057
58	7216
58	7787
58	9352
59	7787
60	3173
60	654
60	4042
60	1835
60	9187
60	8614
60	3703
60	8700
60	7216
60	8782
60	2492
60	6366
60	4722
60	4751
60	5342
60	2498
60	6090
60	2143
60	3373
60	9206
60	7787
60	2145
60	460
60	8639
60	8276
60	1201
60	3734
60	6277
60	7326
60	1638
60	7891
60	3234
60	7714
60	8818
60	5884
60	8425
60	422
60	2092
60	8044
60	2753
60	721
60	7818
60	8753
60	1642
60	1455
60	7901
60	3994
60	5110
60	6893
60	7130
60	4927
61	7787
61	4553
61	1268
61	2604
61	192
61	6714
61	241
61	4485
61	7591
62	1725
63	8863
63	8354
63	6128
63	8756
63	2868
63	8987
63	7638
63	1114
63	116
63	3451
63	161
64	4034
64	3901
64	1792
64	5033
64	7953
64	830
64	4632
64	1988
64	82
64	4228
64	7327
64	6113
64	7600
64	755
64	6360
64	6174
64	5639
64	3278
64	9037
64	9056
64	1849
64	357
64	5758
64	5893
65	6896
65	8696
65	8832
65	2489
65	1095
65	6992
65	6070
65	3771
65	4920
65	7473
65	9101
65	3413
65	4193
65	2033
65	1404
65	6604
65	1923
65	7852
65	7622
65	385
65	9206
65	9124
65	764
65	8231
65	5940
65	2078
65	8478
65	983
65	5945
65	6178
65	5842
65	3223
65	4103
65	2655
65	1593
65	7731
65	8830
65	854
65	5087
65	5323
65	8693
65	4197
65	4602
65	3804
65	2294
65	6541
65	4077
65	2080
65	430
65	9490
65	5527
65	4104
65	5067
65	4167
65	8124
65	3462
1559	1638
1559	3928
1559	8262
1559	2454
1559	124
1559	5815
1559	8001
68	7787
69	9206
69	3327
69	4275
69	410
69	8602
69	3279
69	7672
69	637
70	6652
70	7787
70	7357
70	2816
8763	6307
8763	6496
8763	6083
8763	1096
8763	2854
8763	6426
8763	6057
8763	2684
8763	6998
8763	7275
8763	8452
8763	6470
8763	7736
8763	3776
8763	3557
8763	1733
8763	2852
8763	2356
8763	4419
8763	4461
8763	7625
8763	2143
8763	2872
8763	8328
8763	7787
8763	1094
8763	9021
8763	5460
8763	5419
8763	4904
8763	1430
8763	1312
8763	8579
71	1024
72	7275
72	2914
72	7278
72	7011
72	8769
72	3126
72	789
72	3617
72	7996
72	7840
72	7077
72	4004
72	3264
72	1605
72	8782
72	3218
72	4677
72	5710
72	898
72	5639
72	5148
72	7301
72	2736
72	7787
72	4791
72	8992
72	6652
72	8803
72	5444
72	1276
72	8324
72	110
72	3080
72	4792
72	6471
72	8732
72	6642
72	830
72	1638
72	4139
72	9464
72	2381
72	3722
72	8700
72	7555
72	412
72	4798
72	7968
72	128
72	876
72	6918
72	7047
72	2533
72	5893
72	8262
72	4320
72	7913
72	8924
72	2980
72	5898
72	7130
72	2816
72	5342
72	5177
72	121
73	3500
73	2452
73	2361
73	8420
74	8127
74	7720
74	5358
74	1752
74	2408
74	2914
74	8935
74	7278
74	657
74	1358
74	4150
74	6652
74	3234
74	2839
74	8862
74	9066
74	7216
74	1575
74	4927
74	2083
74	2064
74	7787
74	9402
74	2816
74	5342
74	3722
74	3032
74	9240
74	8157
74	1663
74	4139
74	8803
74	1276
74	5893
74	7477
75	1638
75	2145
75	2108
75	130
75	6228
75	7038
75	7924
75	2063
75	8335
75	1788
445	6041
445	7787
445	2145
445	7125
445	7275
445	4755
445	130
445	5568
445	3032
445	3301
445	7286
77	3117
77	6218
77	4305
77	7120
77	916
77	8445
77	7787
77	7525
77	2262
77	228
77	1626
77	9235
77	3173
7592	5156
7592	8329
7592	5854
7592	1945
78	7787
78	2415
78	6767
78	8287
78	7103
78	6963
78	2622
79	4313
79	7159
79	9440
79	7464
79	7913
79	2259
79	7399
79	9331
80	8021
80	5045
80	3731
80	843
80	2301
80	789
80	7158
80	4297
80	5704
80	5090
80	2209
80	4280
80	5965
80	188
80	6273
80	1376
80	3783
80	2753
80	5342
80	7186
80	2210
80	7787
80	2713
80	6572
80	9306
80	6064
81	7169
81	3311
81	4036
81	1201
81	2425
81	4951
81	7685
81	6883
81	9206
81	1223
81	5210
81	6548
81	9057
81	6353
81	2063
81	3742
81	7637
81	1142
82	4033
82	2081
82	6382
82	7602
82	4042
82	5769
82	5189
82	1173
82	5832
82	9047
82	3587
82	5774
82	8287
82	1550
82	3561
82	1765
82	5197
82	7615
82	5881
82	8531
82	607
82	2916
82	1771
82	2919
82	5209
82	6410
82	8803
82	7600
82	619
82	3691
82	1691
82	1792
82	3949
82	4530
82	255
82	2940
82	8498
82	6052
82	632
82	2381
82	3463
82	2946
82	8911
82	2387
82	2388
82	1224
82	3526
82	5237
82	1758
82	3855
82	7369
82	2535
82	110
82	4696
82	7921
82	8935
82	76
82	530
82	657
82	2791
82	7685
82	2980
82	8949
82	2929
82	4622
82	1049
82	5392
82	94
82	8301
82	98
82	4131
82	8025
82	101
82	4927
82	3440
82	8428
82	684
82	8314
82	4139
82	7715
82	2436
82	1820
82	2967
82	7720
82	5282
82	668
82	6991
82	7103
82	3632
82	7727
82	1285
82	8983
82	4154
82	740
82	5686
82	3581
82	3589
82	6512
82	128
82	1298
82	130
82	5303
82	2816
82	5893
82	721
82	3600
82	4168
82	3034
82	8454
82	6642
82	7127
82	7130
82	5904
82	7900
82	1901
82	7920
82	6815
82	4811
82	6539
82	3614
82	9216
82	1909
82	748
82	9056
82	7301
82	7774
82	2492
82	8378
82	3063
82	1922
82	161
82	6562
82	5342
82	9037
82	2498
82	4788
82	8119
82	8386
82	7787
82	7162
82	4547
82	6652
82	1936
82	9048
82	4080
82	5358
82	9051
82	4220
82	2459
82	7797
82	1135
82	3450
82	7180
82	6591
82	3126
82	6593
82	6820
82	200
82	8991
82	7047
82	6915
82	3100
82	941
82	5974
82	3106
82	798
82	1094
82	5387
82	5388
82	3115
82	4555
82	7077
82	3030
82	5948
82	4260
82	4261
82	2555
82	3994
82	2560
82	3917
82	3707
82	9328
82	1996
82	3136
82	1407
82	1999
82	3047
82	824
82	1411
82	3722
82	8262
82	4851
82	335
82	902
82	2665
82	7869
82	2011
82	7240
82	4875
82	9269
82	6660
82	3711
82	849
82	9446
82	269
82	9154
82	5382
82	6113
82	3745
82	1625
82	6041
82	6046
82	5449
82	3172
82	3173
82	1454
82	1455
82	8464
82	6684
82	5458
82	6059
82	5460
82	3762
82	3751
82	6067
82	7913
82	9120
82	2051
82	7280
82	6073
82	7286
82	1849
82	2998
82	5966
82	1480
82	4351
82	9206
82	6220
82	1926
82	5495
82	9057
82	1320
82	8773
82	3224
82	4038
82	919
82	9227
82	6108
82	2659
82	3809
82	9230
82	4327
82	7327
82	2663
82	4375
82	343
82	4348
82	8686
82	7968
82	2666
82	3617
82	3828
82	8012
82	4233
82	8597
82	2631
82	8424
82	7980
82	362
82	3844
82	3845
82	2125
82	5548
82	7362
82	374
82	8614
82	5923
82	378
82	4994
82	8622
82	3854
82	968
82	8006
82	7373
82	5761
82	5533
82	6855
82	2145
82	3862
82	9197
82	5573
82	398
82	6174
82	1276
82	1608
82	5482
82	989
82	1563
82	2159
82	6859
82	5033
82	2735
82	4452
82	2172
82	1003
82	8671
82	6200
82	6825
82	6349
82	2743
82	430
82	2455
82	2019
82	8556
82	3891
82	1015
82	6213
82	3326
82	3897
82	2759
82	7499
82	3032
82	440
82	6982
82	5542
82	2684
82	3909
82	5636
82	4677
82	7453
82	8969
82	1613
82	5092
82	8080
82	7458
82	7459
82	4303
82	2780
82	1639
82	3496
82	8090
82	5651
82	8724
82	2790
82	5290
82	3363
82	7479
82	4008
82	1638
82	5084
82	1064
82	6262
82	1642
82	5666
82	2904
82	483
82	4526
82	6270
82	8224
82	8924
82	1075
82	4336
82	6275
82	9404
82	8966
82	2986
82	6281
82	8121
82	7996
82	4541
82	1667
82	5778
82	9420
82	7764
82	2415
82	1096
82	3969
82	1837
82	508
82	5121
82	5122
82	5667
82	8687
82	1845
82	3975
82	2839
82	9439
82	7536
82	8782
82	6923
82	1110
82	5296
82	2279
82	9165
82	5141
82	6931
82	8402
82	529
82	6754
82	1698
82	6325
82	5148
82	8992
82	7555
82	3955
82	8162
82	9178
82	1710
82	286
82	5724
82	4001
82	8810
82	6346
82	2732
82	9325
82	6903
82	3336
82	4602
82	5519
82	1746
82	4017
82	6360
82	2316
82	5707
82	3454
82	8195
82	2889
82	5758
82	8468
82	2891
82	7264
82	8408
7818	4983
7818	3023
7818	654
7818	4792
7818	7720
7818	4042
7818	721
7818	2498
7818	1638
7818	5443
7818	6284
7818	2320
7818	5089
7818	3129
7818	1782
7818	7216
7818	2998
7818	3115
83	4099
83	2791
83	9058
83	2914
83	8742
84	6336
84	8244
84	7924
84	7102
84	2828
84	2284
84	397
84	7806
84	2980
84	3587
84	414
84	1607
84	2026
84	3561
84	5392
84	3335
84	5388
84	5339
84	3822
84	2463
84	9453
84	7419
84	4899
84	5597
84	1821
84	1259
84	8493
84	8803
[truncated: 151,139 more rows]
