# Supplementary material
Source: ML conference proceedings conference paper supplement (https://proceedings.neurips.cc/paper_files/paper/2022/hash/040c816286b3844fd78f2124eec75f2e-Abstract.html)
Supplement: Supplementary file 1 [file 040c816286b3844fd78f2124eec75f2e-Supplemental-Conference.zip › DSSL/DSSL/data/twitch/DE/musae_DE_features.json]

{"3159": [308, 1603, 1269, 861, 2484, 861, 920, 224, 3097, 329, 588, 1108, 257, 502, 139, 3054, 2168, 2902, 803, 1796, 436, 2153, 1213, 1525, 751], "3032": [2605, 619, 1371, 861, 1311, 1281, 2814, 119, 1644, 1850, 588, 257, 1796, 318, 276, 2424, 2737, 1213, 2184, 751], "5397": [2554, 3152, 482, 2323, 725, 48, 920, 224, 2798, 606, 2424, 2645, 2362, 2737], "4032": [1554, 216, 1937, 653, 2243, 48, 920, 224, 3097, 1025, 1108, 635, 1559, 3054, 803, 276, 436, 502], "3945": [1121, 221, 2346, 846, 3103, 846, 920, 224, 3097, 1889, 635, 1699, 1447, 719, 3014, 751, 841], "949": [670, 226, 3042, 653, 2668, 48, 920, 224, 3097, 2510, 1013, 1164, 276, 2764], "5137": [1948, 1565, 2801, 861, 2845, 2003, 2814, 119, 1644, 2753, 1013, 276, 2737, 2764, 2424], "9392": [89, 2770, 1937, 2968, 653, 2243, 48, 920, 224, 3097, 706, 1108, 2645, 2737, 717, 2912, 3054, 569, 2362, 2424, 1525, 1195, 83, 2061, 803, 2735, 276, 502, 2549, 2524, 2501, 436, 821], "400": [3152, 653, 359, 846, 920, 224, 3097, 2510, 2534, 2936, 569, 2384, 1147, 440, 3044, 69, 1876], "1803": [1640, 619, 2255, 324, 861, 1974, 1085, 920, 1907, 2185, 2986, 139, 2168, 855, 853, 2362, 3161, 704, 1431, 3019, 1525, 440], "2468": [1948, 3152, 897, 861, 2484, 653, 920, 224, 3097, 400, 2936, 569, 2362, 768, 1525, 2661], "289": [1550, 2770, 2121, 2323, 2004, 2928, 920, 1907, 1612, 2327, 588, 2524, 2549, 635, 83, 1796, 276, 2501, 2424, 2737, 1213, 1147], "5687": [2846, 2446, 2223, 846, 2787, 2330, 2814, 119, 451, 124, 2990, 326, 2015, 1013, 928, 1231, 859, 1228, 383, 584, 1147, 1570, 822, 1548, 2728, 2676, 2238, 1481, 1656, 739, 2023, 1606, 2960, 257, 3032, 569, 2764, 2362, 318, 1245, 1113, 1562, 946, 1525, 2184, 2130, 841, 2732, 1195, 2534, 2709, 139, 1856, 276, 2194, 1839, 1854, 440, 966, 1764, 2502, 1447, 675, 750, 2384, 608, 3112, 719, 2638, 768, 3108, 3088, 3019, 3057], "8815": [2352, 433, 964, 861, 2484, 48, 920, 224, 3097, 2510, 635, 486, 3044, 2502], "2811": [515, 1943, 2927, 653, 1093, 48, 920, 224, 3097, 706, 1108, 3054, 803, 859, 828, 1570, 276, 2645, 2424, 436, 2737, 3051, 502, 3044], "1689": [839, 378, 1036, 861, 2484, 48, 920, 224, 3097, 706, 1108, 3054, 569, 803, 436, 2424, 2737, 502, 2178], "6077": [454, 1618, 2334, 653, 1403, 2003, 920, 1907, 2185, 2538, 588, 257, 2168, 2362, 3051, 1796, 3044, 2442, 2153, 1213, 1147, 763], "3324": [2069, 2918, 861, 213, 2063, 920, 224, 3097, 706, 588, 2524, 2549, 257, 83, 928, 2362, 1796, 276, 2501, 1213, 1028, 1147], "8514": [670, 2770, 2984, 861, 468, 1085, 920, 224, 3097, 400, 2549, 2524, 83, 2501, 2424, 2737, 2409, 2661], "424": [2248, 1417, 2085, 2141, 2323, 2610, 48, 920, 1144, 1761, 760, 588, 257, 1796, 2645, 2424, 2737, 1213, 1147, 751], "5905": [1521, 1535, 1636, 887, 861, 213, 48, 920, 224, 3097, 400, 704, 276, 69, 929, 82], "9045": [2347, 216, 937, 2928, 1659, 2063, 920, 224, 810, 553, 407, 1876, 929, 1447, 139, 569, 2384, 2078, 704, 719, 276, 69, 841], "3702": [1640, 1417, 964, 861, 152, 3164, 920, 224, 3097, 706, 1108, 1895, 2645, 2737, 2153, 1075, 257, 3054, 2656, 802, 2424, 3044, 139, 2168, 2061, 83, 803, 1796, 276, 502, 2178, 588, 2549, 2524, 635, 2501, 436, 1213], "3636": [3068, 2446, 3155, 2024, 861, 2433, 573, 920, 224, 3097, 329, 1656, 1570, 802, 859], "3500": [1640, 1535, 838, 861, 2611, 2282, 920, 224, 810, 1369, 2384], "1769": [89, 2446, 1373, 861, 152, 861, 920, 224, 3097, 1291, 2549, 2524, 83, 2501, 821, 3044, 2424, 2737, 2645, 1505], "3367": [1951, 3152, 1828, 846, 1881, 2003, 920, 224, 810, 1369, 718, 929, 577, 2367, 3054, 3106, 139, 569, 2362, 2384, 176, 1420, 2136, 69, 2889], "349": [1951, 2770, 2082, 1999, 846, 3103, 1649, 920, 224, 393, 2549, 2524, 1387, 83, 569, 2724, 2501, 2645, 2424, 3044, 2737, 751], "1983": [1726, 1417, 2851, 40, 2928, 131, 2063, 920, 224, 810, 3142, 257, 1387, 569, 608, 1147, 2130], "3867": [2846, 1670, 2903, 2323, 2289, 2282, 920, 224, 3097, 1889, 1391, 257, 2962, 635, 569, 608, 1608, 2645, 276, 1548, 1147, 2130, 440], "1234": [2605, 911, 956, 861, 1615, 653, 920, 224, 810, 1161, 257, 1146, 2936, 139, 2384, 3044, 2130], "8341": [3068, 1079, 2557, 653, 2668, 1174, 920, 224, 810, 1218, 2549, 2524, 83, 569, 928, 2501, 1505], "4036": [2846, 476, 2975, 861, 213, 1085, 920, 224, 810, 1428, 2362, 3051, 3044, 2424, 2737, 1028], "137": [2858, 1713, 2481, 861, 3145, 48, 920, 1907, 1612, 2327, 2962, 569, 1608, 2409, 3057, 2661], "5310": [1554, 378, 51, 2522, 1469, 861, 800, 2093, 2063, 1480, 920, 1144, 1761, 760, 1548, 2409, 569, 2661, 2362], "4677": [1948, 2223, 653, 2243, 2282, 920, 224, 3097, 1889, 1108, 928, 2737, 1530, 1548, 257, 569, 3054, 2424, 1431, 946, 1607, 855, 803, 704, 1796, 276, 502, 440, 588, 608, 2068, 436, 768, 1213, 1147], "6242": [2665, 3152, 1464, 861, 213, 1085, 920, 1907, 2185, 1424, 1108, 1645, 569, 2362, 440, 1431, 1147, 2970, 64], "4619": [1948, 3152, 2928, 473, 1649, 920, 224, 3097, 400, 1656, 2549, 2524, 2153, 83, 2168, 276, 2501, 2424, 2737, 751, 440], "8165": [2069, 2770, 17, 1666, 2323, 676, 1047, 920, 1144, 1761, 760, 1656, 1895, 139, 3054, 436, 2424, 2737, 1147, 1525, 2178], "2481": [1199, 1417, 2017, 861, 1594, 1174, 920, 224, 810, 2101, 1656, 1391, 821, 2424, 2737, 1147, 440], "1508": [1726, 1618, 630, 861, 152, 846, 920, 224, 3097, 706, 1548, 768], "8985": [2554, 1417, 1045, 2799, 3084, 1896, 653, 920, 224, 3097, 1025, 1656, 447, 569, 1914, 2677, 156], "9132": [2605, 421, 2121, 653, 1569, 2063, 920, 1907, 1612, 2327, 588, 257, 2660, 1796, 768, 1213, 2677, 3057], "1068": [3048, 2465, 28, 653, 811, 2282, 920, 224, 810, 2204, 1656, 1108, 1387, 855, 3054, 803, 704, 276, 2645, 2424, 1431, 2737, 436, 502], "7388": [839, 2864, 1778, 1807, 653, 811, 2063, 920, 224, 810, 2204, 1656, 440, 2936, 2661], "4207": [454, 2465, 580, 653, 2243, 1649, 920, 224, 3097, 706, 929, 1843, 569, 2362, 1147, 440, 276, 2645, 2424, 768, 2737, 2728, 69, 1525, 2679, 1876], "700": [2598, 1191, 2334, 861, 2484, 691, 2814, 119, 451, 1119, 2936, 635, 2384, 2545, 350, 2661], "4222": [89, 433, 1238, 1806, 653, 2668, 653, 920, 224, 3097, 1291, 2990, 1075, 1764, 569, 1231, 2061, 276, 1245, 2424, 2645, 2737, 768, 1113, 1505], "591": [2598, 476, 2778, 861, 2484, 2063, 920, 224, 3097, 400, 1075, 2912, 2936, 635, 2061, 2424, 2737, 1525, 2661], "6291": [1449, 684, 1636, 653, 2243, 861, 920, 224, 3097, 400, 2549, 2524, 257, 83, 569, 608, 2501, 2424, 2737, 2130], "5250": [308, 3152, 193, 653, 210, 653, 920, 1144, 1761, 760, 1013, 139, 569, 2764, 276], "2475": [515, 1696, 640, 2323, 676, 2323, 920, 224, 3097, 329, 1656, 139, 2168, 2384, 2153], "1464": [89, 294, 580, 3029, 861, 1594, 846, 920, 224, 810, 464, 1013, 635, 569, 2764, 768, 1548], "3377": [1051, 509, 516, 2928, 1616, 2063, 920, 1907, 1612, 2327, 3161, 1525, 2912], "4428": [1133, 1191, 1901, 2686, 846, 1687, 3045, 2814, 119, 1644, 404, 929, 139, 569, 2362, 704, 2107, 69, 440], "8860": [2352, 1713, 846, 759, 2063, 920, 224, 3097, 400, 1074, 588, 2549, 2524, 257, 2153, 2962, 83, 2168, 139, 2384, 430, 2760, 1796, 1608, 2501, 2424, 2737, 1213, 2734], "3167": [2598, 509, 1707, 2373, 861, 155, 1085, 920, 224, 3097, 329, 588, 1108, 257, 502, 3054, 803, 1796, 436, 1213], "4648": [1199, 509, 865, 3111, 861, 960, 2323, 920, 224, 3097, 2510, 1525], "1761": [2598, 216, 1937, 2856, 861, 468, 2928, 920, 224, 3097, 400, 2409, 1662, 569, 2384, 2661], "6377": [2665, 509, 3047, 514, 653, 181, 3026, 3084, 782, 920, 1907, 1612, 2160, 1656, 1195, 1012, 569, 2362, 666], "8559": [2347, 216, 2801, 846, 3103, 757, 920, 224, 810, 2201, 1656, 2447, 2709, 1764, 1895, 675, 3054, 569, 2168, 2656, 1245, 436, 2194, 2153, 2409, 2178], "790": [1521, 1191, 2927, 653, 2243, 1649, 920, 224, 3097, 706, 2990, 569, 1231, 276, 2545, 3044, 1113, 440], "3321": [2069, 1618, 2223, 861, 621, 2282, 920, 224, 810, 2204, 2912, 635, 2362, 383, 2645, 2424, 2737, 1525], "8743": [1951, 1143, 499, 653, 2668, 653, 920, 224, 3097, 706, 1968, 1764, 2912, 2936, 3061, 1013, 139, 569, 2384, 2764, 1245, 802, 1525], "1619": [1550, 3152, 2223, 2323, 1963, 846, 920, 224, 810, 2204, 635, 1548, 276, 840, 2362], "7250": [3048, 1417, 1902, 861, 152, 1649, 920, 224, 3097, 400, 2424, 2384, 2362, 2737, 2936], "3576": [2347, 433, 1883, 695, 861, 960, 48, 920, 224, 3097, 329, 2661, 486, 2502, 2936], "8540": [1051, 307, 62, 2150, 1047, 644, 2928, 920, 224, 3097, 2510, 1525, 139, 2645, 768, 2912], "9105": [2069, 294, 472, 861, 1594, 2063, 920, 224, 810, 2109, 1656, 2709, 929, 1895, 139, 3054, 2168, 859, 2362, 2656, 704, 1570, 318, 436, 2153, 2184, 3088, 69, 1481, 2178, 440], "1295": [3068, 509, 499, 861, 1114, 1047, 920, 224, 3097, 2510, 2549, 2524, 1108, 635, 83, 569, 3054, 803, 704, 2501, 436, 502, 763], "4163": [2858, 1417, 2223, 2344, 861, 2611, 2003, 2814, 119, 451, 1134, 276, 821, 768, 2645, 2409, 2661], "8528": [1199, 3152, 1636, 653, 2224, 2063, 920, 224, 3097, 1997, 928, 2153, 1530, 257, 2960, 929, 569, 1912, 802, 1562, 69, 1525, 1607, 139, 2168, 704, 1796, 440, 588, 608, 768, 1213, 3019], "5557": [1640, 619, 17, 653, 359, 1047, 920, 1144, 1761, 760, 3054, 436, 2902, 751], "4852": [438, 2864, 60, 653, 1304, 1649, 920, 224, 3097, 400, 1656, 326, 588, 257, 1606, 1213, 569, 2384, 859, 2362, 1570, 1796, 821, 2424, 2737, 2676, 1028, 1147, 1481, 2734], "3942": [1521, 1079, 2082, 846, 654, 48, 920, 224, 3097, 2510, 2549, 2524, 83, 2501, 2645, 2424, 2737], "6436": [1951, 2770, 1095, 3035, 861, 2484, 2928, 920, 224, 3097, 2874, 2549, 2524, 83, 569, 1362, 2384, 318, 276, 2424, 2501, 2737, 2184, 751, 390], "8372": [2605, 2446, 1832, 653, 359, 1649, 920, 224, 3097, 2510, 1548, 276, 3044, 2442], "181": [2248, 3152, 2334, 861, 1594, 1649, 920, 224, 3097, 1889, 588, 257, 1013, 569, 2764, 1796, 2424, 2737, 1548, 1213], "3442": [308, 174, 653, 784, 861, 920, 224, 810, 754, 465, 1387], "3055": [1554, 378, 29, 861, 152, 2063, 920, 224, 3097, 706, 1108, 3054, 2384, 803, 2362, 436, 2424, 2737, 502, 1028, 2661], "1434": [1121, 216, 1301, 861, 213, 1085, 920, 1907, 2185, 2538, 407, 1656, 2534, 139, 569, 2384, 2078, 1147, 440, 3088, 69, 1876], "1518": [515, 168, 2831, 2928, 495, 846, 920, 224, 3097, 400, 1801, 1764, 2359, 569, 1245, 768, 2475, 2737, 2424, 2728, 1505], "3744": [454, 1713, 2338, 1077, 846, 45, 3164, 920, 224, 3097, 329, 2115, 3108, 2709], "1136": [1199, 1417, 3020, 653, 1499, 2928, 920, 224, 810, 3142, 2960, 929, 3019, 3054, 569, 139, 2902, 1147, 704, 440, 802, 436, 3143, 2265, 69, 751, 1876], "7230": [3048, 2060, 640, 653, 2243, 3164, 920, 224, 3097, 706, 1968, 1764, 2709, 2660, 3061, 1013, 569, 1362, 2764, 2061, 276, 1245, 2424, 821, 2737, 2684, 2677, 1525, 3057, 390], "1947": [2598, 1222, 104, 653, 210, 3164, 920, 1144, 1761, 760, 2549, 2524, 1108, 2502, 83, 3054, 2168, 803, 2501, 436, 2645, 2153, 502, 486], "6689": [2665, 1535, 653, 856, 48, 920, 224, 810, 3142, 2549, 2524, 83, 2501, 2970], "3088": [2858, 1222, 259, 2928, 1785, 2330, 2814, 119, 1644, 1370, 2960, 2936, 635, 276, 2645, 1548, 3019, 2661], "1022": [2069, 2918, 1902, 653, 1304, 1649, 920, 224, 3097, 1889, 2912, 1645, 569, 1420, 2136, 1147, 1525, 440], "8496": [515, 165, 2354, 846, 673, 757, 920, 224, 3097, 400, 2362], "6046": [454, 1222, 964, 861, 152, 1649, 920, 224, 3097, 706, 966, 569, 1525, 853], "6133": [2665, 2060, 1937, 653, 2668, 757, 920, 224, 3097, 400, 2732, 2335, 855, 569, 2362, 704, 1431, 1147, 946, 3057], "5929": [1133, 1191, 794, 653, 2668, 1649, 920, 224, 810, 464, 2549, 1968, 2524, 3061, 83, 2168, 139, 2501, 2645, 2153, 751], "3200": [2248, 1079, 707, 2253, 861, 2484, 1649, 920, 1144, 1761, 760, 1656, 2549, 2524, 2502, 1699, 928, 83, 1147, 276, 2501, 1627, 486], "2904": [308, 3152, 955, 1400, 846, 3103, 1777, 920, 224, 3097, 1889, 2549, 2524, 588, 257, 2479, 635, 83, 569, 2362, 1762, 1796, 276, 802, 2424, 2501, 2737, 1548, 1213, 1028], "2554": [2347, 226, 964, 861, 152, 2003, 920, 224, 3097, 706, 588, 1607, 257, 928, 2168, 2384, 1530, 1796, 2153, 1213], "4876": [1449, 476, 3047, 507, 861, 1114, 1586, 1649, 920, 1907, 1612, 2327, 1656, 569, 2384, 1295, 1914, 598, 2661], "598": [2858, 1713, 3020, 861, 213, 1649, 920, 224, 810, 1428, 1968, 3061, 928, 2362, 2645, 2424, 2737, 1509, 751], "3257": [1199, 1417, 2494, 2065, 888, 507, 976, 1034, 861, 1114, 3164, 773, 920, 1144, 1761, 760, 139, 1570, 1525, 859], "5741": [2858, 2465, 2094, 2323, 2004, 1649, 920, 224, 3097, 2510, 1656, 1195, 2912, 635, 139, 2168, 276, 2153, 1548, 1525, 440], "3812": [1234, 3152, 1068, 2928, 1661, 2063, 920, 224, 3097, 400, 2549, 2524, 83, 3051, 2501, 821, 2645, 3044], "8542": [2665, 166, 642, 507, 2762, 861, 960, 2323, 1501, 920, 1907, 2302, 896, 1391, 1108, 1764, 635, 3054, 569, 803, 440, 1245, 2424, 436, 2737, 2409, 502, 1147, 2661], "5143": [2347, 166, 1867, 1454, 653, 856, 653, 920, 1144, 1761, 760, 1762, 276, 2645, 3044, 2479], "3242": [2605, 421, 955, 653, 2243, 3023, 920, 224, 3097, 2642, 2912, 1387, 2384, 2724, 802, 2424, 2737, 1028, 1147, 1525], "8552": [1521, 2005, 396, 846, 45, 757, 920, 224, 3097, 1997, 588, 257, 1796, 2645, 2424, 2737, 1213], "2299": [194, 307, 2820, 536, 2928, 80, 846, 920, 224, 3097, 2510, 1108, 1013, 635, 3054, 2764, 803, 436, 2424, 2737, 502], "9227": [454, 911, 2161, 846, 1582, 691, 920, 224, 3097, 2642, 588, 2524, 2549, 257, 83, 569, 1796, 276, 821, 2501, 1548, 1213, 763], "5803": [1521, 1079, 1081, 633, 861, 2484, 1649, 920, 224, 3097, 706, 2549, 2524, 83, 276, 2645, 768, 2501], "1134": [2069, 476, 1540, 653, 2243, 1649, 920, 224, 810, 2204, 1656, 257, 2936, 1342, 139, 2638, 768, 1147, 2130], "4770": [2846, 619, 504, 861, 1594, 2063, 920, 224, 810, 553, 1656, 588, 2534, 929, 2912, 635, 139, 569, 2384, 584, 1228, 704, 440, 1147, 1796, 276, 1213, 69, 1525, 2631, 1876], "7587": [1948, 3152, 2928, 473, 846, 920, 224, 810, 3142, 588, 257, 928, 1796, 2645, 1548, 1213], "1595": [2665, 509, 143, 2928, 1659, 3164, 920, 224, 3097, 2510, 1391, 1108, 1147, 1608, 2645, 2737, 2960, 3054, 2424, 2732, 2962, 803, 502, 1854, 440, 2936, 2384, 821, 768, 436, 3019, 3057], "8605": [1951, 421, 1540, 2257, 861, 621, 3023, 2814, 119, 451, 1119, 2962, 569, 1608, 276, 751, 440], "3689": [2665, 1222, 964, 653, 600, 2063, 920, 224, 3097, 706, 635, 276, 802, 2424, 3044, 2737, 768], "9477": [2347, 2446, 414, 2928, 473, 2063, 920, 224, 3097, 400, 1656, 929, 859, 704, 1570, 1113, 69], "1972": [454, 166, 2927, 653, 2668, 3023, 920, 224, 3097, 706, 588, 257, 1796, 2424, 2737, 1548, 1213, 2734], "6754": [1234, 3152, 3059, 653, 1932, 1649, 920, 224, 810, 2201, 276, 3044], "5118": [2598, 216, 1603, 961, 861, 1974, 653, 920, 1144, 1761, 760, 1656, 2549, 2524, 83, 139, 2724, 2501, 802, 458, 1525, 1481], "7575": [2858, 2770, 3102, 1127, 653, 2243, 653, 920, 224, 3097, 1291, 1656, 569, 2645, 1147, 2335, 440], "1607": [670, 1535, 2223, 735, 653, 2668, 2282, 920, 224, 393, 2391, 2534, 635, 928, 139, 2362, 133, 2645, 3044, 1548, 1627, 1525], "4234": [2554, 294, 995, 846, 1687, 3164, 920, 224, 3097, 1997, 276, 821, 2424, 751, 2737], "3145": [839, 1191, 2508, 653, 3017, 48, 920, 224, 3097, 2510, 2549, 2524, 83, 569, 139, 2501, 1548, 1147], "8193": [2858, 2464, 630, 653, 2668, 1085, 920, 224, 3097, 706, 1895, 859, 1570, 2737, 2153, 1656, 929, 569, 3054, 2362, 2656, 2424, 69, 1387, 139, 2168, 704, 2178, 440, 608, 436, 1147], "9080": [308, 3152, 2346, 861, 152, 3023, 920, 224, 3097, 2642, 69, 139, 569, 2384, 929], "8655": [1199, 3152, 2801, 861, 2845, 757, 920, 224, 3097, 1889, 588, 1764, 257, 2912, 2936, 635, 139, 569, 2168, 2384, 2362, 1796, 276, 1245, 3044, 2153, 1213, 1028, 1147, 1525], "4418": [2846, 2142, 333, 653, 1304, 2919, 2814, 119, 1644, 1370, 2724, 1387], "4357": [1199, 1222, 1540, 861, 152, 48, 920, 224, 3097, 2767, 2549, 2524, 1108, 83, 3054, 803, 2501, 436, 3044, 276, 802, 502], "2221": [454, 476, 2346, 861, 2845, 2928, 920, 224, 3097, 2767, 588, 257, 2912, 569, 2362, 1796, 2645, 3044, 1213, 1028, 1525], "7516": [1640, 294, 1937, 2323, 1734, 1085, 920, 224, 3097, 706, 588, 257, 1013, 635, 2384, 2764, 1796, 276, 821, 1213], "420": [1640, 1191, 899, 792, 653, 359, 1258, 1649, 920, 1144, 1761, 760, 2549, 2524, 1387, 83, 569, 1362, 608, 2501, 2645, 1548, 390], "493": [1051, 2005, 2334, 861, 489, 3164, 920, 224, 810, 2201, 276, 1147], "8783": [308, 3152, 2928, 2145, 3164, 920, 224, 3097, 1025, 588, 1213, 1796, 569, 257], "6995": [1449, 166, 333, 2323, 2070, 1649, 920, 224, 810, 394, 2534, 2709, 2912, 1525, 1856, 2384, 3004, 1147, 1260, 440], "5571": [308, 3152, 3047, 1469, 861, 960, 115, 861, 246, 920, 1907, 1612, 2327, 2534, 139, 569, 2362, 2914, 2409, 2180], "5594": [515, 2142, 5, 847, 2190, 507, 958, 820, 1047, 1345, 1047, 920, 1144, 1761, 760, 2549, 2524, 1013, 83, 2764, 2501, 276, 3044, 1028], "5607": [1133, 2060, 2785, 2394, 3084, 1022, 1047, 920, 1144, 1761, 760, 1762, 2645, 2424, 2737, 2479], "7240": [2665, 1222, 3059, 861, 213, 3023, 920, 224, 810, 1102, 1607, 1662, 1387, 928, 569, 2319, 1530, 2734], "8510": [308, 1219, 653, 1569, 2928, 920, 224, 3097, 400, 1075, 1683, 635, 2061, 996, 2645], "1338": [2605, 2770, 861, 2611, 757, 920, 224, 810, 2201, 276, 821, 3044, 1548, 1147, 440], "684": [1951, 2770, 2801, 1657, 653, 2668, 1085, 920, 224, 3097, 706, 1391, 1608, 2645, 2153, 1505, 1656, 257, 2912, 3054, 2362, 318, 802, 3044, 1431, 1525, 2184, 751, 1195, 2962, 139, 2168, 855, 704, 1796, 276, 440, 588, 2936, 2384, 2902, 436, 768, 1213, 1147, 3057], "5410": [2605, 509, 334, 653, 2243, 1649, 920, 224, 3097, 400, 2549, 2524, 257, 2962, 83, 1608, 2501, 1147, 2130, 440], "819": [1726, 2864, 2223, 861, 2611, 757, 920, 224, 3097, 1889, 2691, 2813, 1548, 1505, 1075, 257, 2912, 2960, 569, 946, 1525, 2061, 1796, 276, 2983, 3070, 588, 966, 1213, 3019, 1753, 3057], "6810": [1951, 2770, 1936, 653, 1304, 1649, 920, 224, 810, 2964, 1656, 1223, 569, 822, 608, 1584, 2728, 2335], "899": [2248, 2446, 2223, 653, 1539, 846, 920, 224, 3097, 2767, 2612, 3054, 2902, 436, 2914, 2424, 2737], "5836": [2665, 1222, 1547, 846, 673, 2063, 920, 1907, 1612, 2327, 2549, 2524, 1108, 83, 3054, 139, 803, 2501, 436, 3044, 2424, 2737, 502, 440], "7726": [1726, 1222, 630, 861, 468, 3164, 920, 224, 3097, 2767, 1607, 1993, 257, 1587, 928, 569, 139, 2384, 1530, 276, 802, 2424, 2737, 1548, 3088, 1147], "729": [670, 3152, 5, 847, 2190, 507, 958, 820, 861, 960, 1849, 1698, 48, 2982, 920, 1144, 1761, 760, 2549, 2524, 83, 139, 2362, 2501, 802], "6819": [308, 3152, 1381, 844, 653, 181, 724, 846, 920, 1144, 1761, 760, 1656, 2524, 2549, 2502, 83, 2501, 2645, 2424, 276, 2737, 486], "3891": [89, 2060, 787, 1894, 653, 2331, 1085, 920, 224, 810, 18, 928, 3051, 1530, 2737, 257, 569, 3054, 802, 2424, 3044, 1607, 1387, 139, 1796, 276, 763, 588, 2384, 2902, 2724, 608, 436, 1213], "6340": [2069, 1713, 707, 2928, 1659, 1085, 920, 224, 3097, 706, 588, 257, 1013, 2764, 2362, 1796, 2645, 2424, 2737, 1213, 2677, 1028], "5910": [2665, 2770, 206, 3089, 2928, 1884, 846, 920, 224, 810, 754, 1108, 3054, 803, 436, 2645, 2914, 502, 1147], "6578": [1521, 1079, 964, 2934, 861, 1437, 861, 920, 224, 3097, 706, 2549, 2524, 1108, 2737, 2015, 83, 3054, 2168, 803, 2501, 436, 2424, 1839, 2153, 318, 502, 2184], "1816": [1554, 1079, 2141, 861, 2073, 846, 920, 1144, 1761, 760, 2960, 929, 69, 2362, 704, 3019], "5939": [1948, 1565, 2430, 2024, 653, 181, 3164, 920, 224, 3097, 329, 1656, 139, 1147, 2709, 440], "5019": [839, 2864, 838, 2928, 1785, 1085, 920, 224, 810, 1369, 1108, 1387, 139, 3054, 803, 436, 802, 502, 3057], "3642": [2665, 1222, 629, 1396, 653, 2313, 861, 920, 224, 3097, 1025, 588, 257, 1387, 635, 2724, 1796, 2424, 2737, 1213, 908, 751], "8978": [2598, 1191, 2223, 653, 1539, 3023, 920, 224, 810, 2201, 2912, 1013, 2168, 1599, 2764, 2645, 821, 2153, 2228, 2677, 1525, 1505], "5039": [2069, 1713, 29, 2323, 1676, 48, 920, 224, 810, 2204, 2549, 2524, 1108, 1764, 2502, 83, 3054, 569, 803, 3051, 2501, 1245, 2424, 3044, 2737, 436, 502, 486], "6239": [3048, 509, 62, 2323, 2756, 653, 920, 224, 3097, 2510, 2549, 2524, 83, 928, 2384, 2501, 2424, 2737, 1532, 2771], "4143": [1521, 1079, 1053, 2323, 1963, 2063, 920, 224, 3097, 27, 1391, 2936, 635, 2384, 2424, 2737, 3108, 2677, 1147, 440], "3151": [2347, 307, 122, 1394, 2323, 1768, 861, 920, 224, 810, 553, 751, 855, 704, 1431, 2424, 2737, 3044, 2677, 1505], "4517": [1948, 1565, 180, 861, 2484, 1649, 920, 224, 810, 2204, 2502, 1895, 3054, 569, 2168, 2902, 2656, 608, 1111, 318, 276, 821, 768, 436, 2349, 1525, 2184, 2178], "8832": [515, 3152, 653, 2243, 757, 920, 224, 810, 18, 588, 2115, 1195, 257, 2362, 1796, 276, 1548, 1213, 1481, 440], "8072": [1199, 619, 2486, 653, 2668, 653, 920, 224, 3097, 1291, 635, 1645, 2424, 2737], "1600": [1948, 421, 2334, 251, 2928, 131, 2282, 920, 224, 810, 2204, 588, 257, 2912, 1796, 768, 1213, 1525, 1505], "2419": [308, 3152, 496, 2928, 2198, 3023, 920, 224, 3097, 1001, 1387, 139, 1362, 2724, 390, 276, 2645, 440], "7213": [2665, 166, 1937, 861, 2484, 48, 920, 224, 3097, 1025, 1656, 1108, 2709, 3054, 569, 803, 436, 2664, 2424, 2737, 502, 2677, 2734], "5960": [1234, 3152, 496, 3084, 2051, 3164, 920, 224, 3097, 706, 2990, 345, 1764, 2709, 696, 569, 1231, 318, 1245, 1113, 1070, 2677, 2184, 869], "6817": [89, 433, 1937, 861, 2484, 1777, 920, 224, 3097, 706, 588, 2549, 2524, 257, 83, 1796, 276, 2501, 2424, 2737, 1213, 1028, 1147], "1285": [2248, 2446, 712, 2928, 497, 1649, 920, 224, 810, 1369, 2677, 1362, 3044, 802, 390], "3585": [308, 3152, 1045, 861, 468, 2063, 920, 224, 3097, 400, 1607, 2549, 2524, 588, 2737, 257, 928, 569, 83, 1796, 276, 2711, 2424, 2501, 1530, 1548, 1213], "4344": [3048, 2060, 1540, 861, 213, 48, 920, 224, 3097, 1889, 751, 1843, 855, 704, 1431, 2424, 2737, 2677, 2679], "862": [2605, 2770, 1680, 2094, 861, 2484, 653, 920, 1144, 1761, 760, 2549, 2524, 1342, 83, 2638, 2501], "4481": [839, 1222, 1053, 861, 420, 2928, 920, 224, 3097, 706, 2962, 569, 1608], "1912": [1449, 911, 630, 2928, 1659, 846, 920, 224, 3097, 706, 2015, 1839, 2362], "6144": [2069, 294, 1219, 2712, 861, 2484, 1649, 920, 224, 3097, 2510, 2661, 1391, 2936, 2384, 2409, 1147, 440], "7466": [1449, 911, 861, 231, 2323, 920, 224, 810, 3142, 2549, 2524, 83, 2501, 2645], "5109": [1449, 1535, 2481, 349, 2242, 846, 920, 1907, 1612, 795, 326, 1895, 1505, 3054, 569, 2384, 2362, 2656, 802, 436, 763, 2178], "4025": [3040, 509, 1867, 846, 759, 653, 920, 224, 3097, 2510, 569, 608, 2645, 2424, 2737, 2677], "7420": [1051, 3152, 2346, 653, 1304, 3023, 2814, 119, 451, 124, 2549, 2524, 83, 2362, 2501, 1028, 1147], "7536": [1234, 3152, 2223, 2928, 2012, 3045, 2814, 119, 451, 957, 2015, 853, 859, 1570, 2737, 1548, 2153, 1656, 1075, 650, 569, 2764, 2424, 2409, 946, 1525, 139, 2168, 2629, 2061, 276, 1839, 966, 635, 2384, 1178, 183, 2606, 2819], "5859": [308, 3152, 2213, 861, 2484, 48, 920, 224, 3097, 1398, 588, 257, 2936, 139, 569, 2384, 1912, 2362, 1796, 1213, 1525, 2661], "18": [1726, 2060, 2196, 656, 653, 126, 3084, 920, 224, 2798, 606, 2534, 257, 3044, 1147, 2130, 440], "4643": [2554, 294, 640, 2928, 1659, 48, 920, 224, 3097, 706, 2734, 1764, 1013, 569, 2764, 1245, 2424, 2737, 3057], "5287": [670, 2060, 2281, 846, 1881, 1281, 2814, 119, 1644, 2208, 1391, 1895, 2936, 569, 2362, 440, 2661], "2336": [1234, 3152, 2494, 2065, 888, 507, 976, 1034, 653, 2322, 1179, 770, 653, 1284, 742, 998, 920, 1144, 1761, 760, 3057, 2384, 1295, 1028, 1147, 2734], "8619": [2554, 166, 542, 2769, 653, 600, 757, 920, 224, 810, 1102, 1391, 2936, 2962, 635, 2384, 3051, 1608, 3044, 1147, 440], "3317": [1726, 433, 3122, 3029, 2928, 473, 2063, 920, 224, 810, 918, 1656, 1607, 1699, 928, 569, 855, 704, 1431, 1530, 3057, 2661], "6703": [2352, 1191, 5, 847, 2190, 507, 958, 820, 846, 2639, 1528, 2466, 653, 2428, 579, 1390, 920, 1144, 1761, 760, 3161, 69, 1525, 929, 2362], "9113": [839, 433, 2354, 1017, 861, 1320, 2063, 920, 1907, 1612, 2327, 201, 2480, 1525, 2912], "6515": [2665, 221, 2927, 2186, 2323, 2897, 3164, 920, 224, 810, 464, 326, 2350, 2691, 1895, 2343, 853, 2645, 2737, 1548, 2676, 1028, 1481, 1876, 2661, 2960, 3054, 569, 2362, 2656, 1431, 2424, 1525, 1745, 751, 841, 533, 855, 704, 276, 2178, 966, 1447, 2617, 2384, 719, 3092, 436, 3019, 1753], "53": [1951, 2770, 3047, 1469, 861, 800, 48, 920, 1907, 1612, 2327, 635, 2534, 139, 2362], "5436": [515, 221, 591, 1486, 1354, 2323, 1501, 573, 920, 1144, 1761, 760, 1570, 859, 2661], "3074": [194, 2918, 340, 544, 653, 2282, 920, 224, 3097, 705, 569, 1525, 276], "1017": [2554, 2142, 128, 653, 2243, 48, 920, 224, 3097, 706, 1108, 502, 3054, 2168, 803, 2362, 276, 436, 2153, 1295, 1028, 598], "3178": [194, 433, 2223, 1423, 653, 59, 1649, 920, 224, 810, 918, 1108, 2479, 635, 3054, 569, 2902, 803, 2362, 608, 704, 1762, 276, 436, 2424, 2737, 502, 751], "5115": [454, 2864, 1540, 846, 654, 48, 920, 224, 393, 2810, 1607, 928, 1113, 1530], "4966": [1640, 619, 2928, 3164, 920, 224, 3097, 1889, 2549, 2524, 1656, 83, 855, 822, 704, 276, 2501, 1431, 2728, 2734], "322": [2069, 433, 949, 653, 1304, 1085, 920, 224, 3097, 706, 3051, 318, 276, 3044, 2424, 2737, 2645, 2184], "5771": [1234, 3152, 1540, 861, 152, 2282, 920, 224, 3097, 2767, 3161, 2661, 257, 2478, 2936], "6392": [89, 1417, 1540, 653, 1539, 1649, 920, 224, 3097, 1889, 588, 257, 1796, 2424, 2442, 2737, 3044, 1213], "4740": [308, 3152, 580, 653, 2668, 846, 920, 224, 810, 1290, 1108, 1895, 859, 828, 1570, 2645, 2153, 1656, 257, 3054, 2656, 139, 2168, 803, 1796, 276, 502, 2178, 588, 2936, 2384, 436, 1213, 1147], "2039": [1726, 1191, 591, 2074, 989, 1047, 1345, 2619, 1047, 1441, 920, 1144, 1761, 760, 2549, 2524, 884, 83, 569, 276, 2645, 2501], "4946": [2598, 911, 1540, 861, 213, 48, 920, 224, 810, 1102, 588, 2534, 257, 2960, 1013, 569, 1796, 1213, 3019], "5614": [839, 911, 1081, 861, 2484, 861, 920, 224, 3097, 400, 1656, 2549, 2524, 814, 2015, 83, 2068, 1839, 2645, 2424, 2501, 2737], "2450": [454, 1222, 542, 861, 213, 2003, 920, 224, 3097, 2767, 2549, 2524, 1108, 2960, 2936, 83, 3054, 2384, 803, 276, 802, 2914, 2424, 2737, 2501, 502, 436, 3019], "9068": [670, 226, 2222, 2928, 2485, 653, 920, 224, 3097, 329, 588, 257, 1013, 569, 2764, 608, 1796, 2645, 2424, 1213, 1147], "6": [1948, 3152, 2785, 2477, 861, 1974, 2063, 920, 1144, 1761, 760, 569], "7797": [1726, 1222, 3013, 861, 691, 2814, 119, 1644, 2208, 1147, 2737, 1548, 1028, 1656, 257, 2960, 929, 569, 2362, 2424, 69, 568, 1387, 139, 704, 1796, 276, 440, 588, 2724, 2545, 768, 1213, 3019, 2734], "7133": [670, 2770, 2300, 861, 846, 920, 224, 393, 1108, 3054, 569, 803, 276, 2645, 3044, 2424, 2737, 436, 502, 1505], "6384": [1640, 3152, 964, 861, 621, 1085, 920, 224, 3097, 706, 1656, 675, 2168, 2409, 276, 2194, 2153, 1548], "3306": [2605, 2142, 964, 861, 213, 3164, 920, 224, 3097, 706, 1656, 569, 635, 751, 2384], "3247": [1234, 3152, 1902, 653, 1304, 2063, 920, 224, 3097, 706, 2549, 2524, 588, 257, 1387, 2015, 2936, 83, 635, 2384, 2724, 1796, 1839, 2645, 1431, 2501, 1548, 1213, 1525, 2130], "8197": [1948, 421, 2801, 861, 213, 757, 920, 224, 3097, 706, 588, 326, 2549, 2524, 257, 1387, 2936, 1213, 83, 569, 2724, 1796, 2501, 821, 2676, 350, 1525, 2661], "3384": [194, 1222, 964, 3084, 2022, 846, 920, 224, 810, 464, 588, 257, 1895, 3054, 859, 2656, 1570, 1796, 436, 2424, 2737, 1213, 1481, 2178], "133": [1554, 166, 967, 3162, 2323, 408, 1085, 920, 224, 810, 3142, 139, 569, 318, 821, 1548, 2677, 2184], "8888": [89, 166, 3047, 827, 861, 800, 1823, 2928, 1641, 920, 1907, 1612, 2327, 1559, 1028, 1147, 2734, 440], "8882": [308, 3152, 2281, 2622, 2928, 131, 653, 920, 224, 810, 2964, 1195, 440, 802, 2709, 2362], "4879": [2665, 1535, 937, 653, 811, 3023, 920, 1907, 1612, 2327, 2549, 2524, 588, 257, 83, 569, 1796, 2501, 1213], "6893": [2858, 509, 29, 2928, 473, 1649, 920, 224, 3097, 706, 1195, 1764, 928, 569, 1245, 768, 3088], "8722": [3068, 911, 593, 2968, 2928, 1659, 48, 920, 224, 3097, 706, 1764, 929, 569, 821, 1245, 69, 1945], "7210": [2846, 1713, 967, 861, 184, 757, 920, 224, 810, 12, 1195, 2737, 2912, 395, 569, 2168, 584, 1228, 2362, 3161, 2914, 2424, 2153, 768, 1525, 2661], "3844": [1726, 2864, 2140, 861, 152, 1777, 920, 224, 810, 1102, 2015, 928, 2737, 2153, 1876, 1656, 569, 2362, 318, 1245, 2424, 1431, 69, 946, 2184, 1342, 1387, 139, 2168, 855, 704, 276, 1839, 1764, 2724, 2638, 3057], "8702": [1951, 165, 787, 3084, 653, 920, 224, 3097, 706, 2936, 1362, 2384, 318, 821, 3044, 2424, 2737, 2184, 390], "7695": [1234, 3152, 807, 861, 1974, 2323, 920, 224, 3097, 329, 588, 1213, 1796, 257, 1505], "494": [1234, 3152, 2927, 2928, 473, 2063, 920, 224, 3097, 1889, 1387, 2724, 802, 2645, 2424, 2737, 751], "5242": [1951, 2770, 794, 1782, 653, 2668, 3164, 920, 224, 3097, 1025, 2549, 2524, 1108, 751, 83, 3054, 2902, 803, 318, 436, 2424, 2501, 2737, 502, 1028, 1147, 2184, 3057], "602": [1951, 2770, 1226, 3123, 3084, 2928, 920, 224, 3097, 2510, 1108, 2479, 3054, 803, 2362, 1762, 436, 768, 2424, 2737, 502, 1028, 2734], "1476": [89, 2005, 955, 861, 425, 2282, 920, 224, 810, 1102, 1656, 2709, 1606, 1013, 1843, 569, 2764, 2424, 2737, 1147, 2679, 440], "6563": [308, 3152, 653, 54, 48, 920, 224, 810, 3142, 588, 257, 929, 569, 1796, 1213, 69], "4679": [2846, 2918, 1478, 2094, 861, 736, 2928, 920, 224, 3097, 2510, 569, 608, 3051, 2424, 1431, 2737, 3044, 2728], "4763": [2554, 294, 51, 1942, 403, 861, 960, 3028, 846, 2507, 920, 1144, 1761, 760, 2409, 139, 780, 751, 2362], "8771": [670, 1535, 1541, 1047, 1833, 1649, 920, 1907, 2185, 1424, 929, 395, 569, 2384, 3161, 2645, 1070, 3088, 69], "969": [2605, 1079, 1622, 989, 2323, 1967, 1085, 920, 224, 3097, 329, 635, 928, 276], "6254": [2248, 433, 1081, 1092, 2323, 2766, 2063, 920, 224, 3097, 706, 822, 276, 2645, 2424, 2737, 2728], "7927": [2347, 2464, 49, 2024, 2928, 2738, 48, 920, 1144, 1761, 760, 588, 1108, 257, 502, 139, 3054, 803, 2478, 1796, 436, 2424, 802, 2737, 1213, 440], "7885": [438, 2005, 2561, 861, 2164, 3164, 920, 224, 3097, 706, 588, 1764, 257, 928, 569, 1796, 1245, 821, 1213, 1509], "9249": [515, 294, 861, 1320, 2928, 920, 224, 3097, 2510, 635, 139, 2384, 802, 2936], "4336": [2598, 166, 2281, 653, 1304, 1777, 2814, 119, 451, 957, 2936, 1013, 635, 2384, 2764, 276, 2424, 2737, 2409, 3057, 2661], "5786": [2846, 421, 143, 2928, 473, 653, 920, 224, 810, 2204, 2990, 2479, 569, 1231, 608, 2362, 1762, 318, 821, 276, 1113, 2737, 2424, 1028, 2184], "4586": [1726, 1079, 964, 100, 861, 152, 1085, 920, 224, 810, 2204, 635, 276, 2645], "3047": [2248, 684, 1540, 861, 1621, 1777, 920, 224, 3097, 1889, 1656, 326, 588, 257, 1213, 2163, 928, 569, 1295, 2362, 1796, 3044, 1548, 2676, 1028, 1147, 1525, 2130], "8483": [3048, 1222, 653, 784, 48, 920, 224, 3097, 400, 1607, 780, 2737, 2936, 635, 928, 569, 2384, 2645, 2424, 1530, 751], "5742": [1121, 2446, 1937, 861, 213, 1649, 920, 224, 810, 464, 2549, 2524, 2912, 2960, 2936, 139, 569, 83, 1912, 2384, 276, 2501, 3019, 1525], "6021": [2858, 1191, 1609, 846, 759, 2323, 920, 224, 3097, 2510, 2936, 928, 440, 821, 1147, 2661], "1709": [515, 294, 1465, 2323, 2382, 3164, 920, 224, 810, 272, 1656, 1764, 569, 2579, 2362, 2645, 1245, 3044, 2079, 1548, 2341, 3057, 2728], "1232": [2846, 1713, 3047, 1650, 403, 846, 487, 280, 846, 2507, 920, 1907, 1612, 2327, 1895, 3019, 3054, 569, 2168, 436, 3044, 1147, 2178, 440], "511": [438, 2770, 60, 861, 2260, 1085, 920, 224, 810, 3142, 2549, 2524, 588, 257, 2936, 2617, 83, 569, 2384, 1796, 318, 276, 2501, 768, 1213, 2184, 751], "2726": [1948, 421, 2334, 2928, 793, 1085, 920, 1907, 2185, 2538, 1391, 635, 569, 2168, 608, 3051, 3044, 2153, 1147, 440], "6506": [1521, 1191, 2801, 653, 1304, 846, 920, 224, 393, 2810, 1108, 2502, 2153, 3054, 2168, 803, 821, 2914, 2424, 2737, 3044, 502, 436, 486], "869": [1640, 1191, 1540, 653, 1403, 3023, 920, 224, 810, 2204, 635, 2409, 276, 2645, 2661], "6049": [438, 1417, 1964, 861, 152, 48, 920, 224, 3097, 2510, 2479, 1013, 3054, 2902, 2764, 1762, 436, 2424, 2737], "7643": [1234, 3152, 2144, 861, 1974, 2928, 920, 224, 3097, 2510, 3032, 569, 584, 1228, 2914, 2238, 1071], "4504": [1199, 509, 1053, 653, 1304, 3164, 920, 224, 3097, 400, 2409, 276, 2661], "5798": [438, 2864, 712, 846, 1122, 510, 2814, 119, 1644, 1850, 139, 569, 2384, 608, 2362, 276, 1548], "4060": [1640, 433, 1053, 861, 184, 2063, 920, 224, 810, 2204, 2549, 2524, 1108, 635, 83, 3054, 803, 2501, 2645, 436, 2424, 2737, 502], "2587": [515, 294, 29, 3084, 2051, 846, 920, 224, 3097, 1889, 1195, 257, 569, 608, 2362, 276, 2645, 2947, 2130], "4733": [670, 433, 861, 1320, 3164, 920, 224, 3097, 2510, 588, 257, 139, 569, 1796, 1213, 1147, 1525, 440], "8007": [1640, 2918, 2820, 270, 861, 152, 653, 920, 224, 3097, 1025, 1108, 1559, 3054, 803, 436, 2645, 502], "6816": [2347, 684, 2346, 861, 213, 1649, 920, 224, 3097, 706, 2990, 1108, 1895, 1231, 2737, 257, 3054, 2362, 802, 2424, 1113, 1525, 1387, 139, 803, 1796, 502, 588, 2902, 2724, 436, 1213, 1147], "5185": [89, 166, 2281, 861, 621, 1649, 920, 224, 810, 1006, 1656, 2990, 1195, 3054, 1231, 2902, 2643, 276, 436, 1113], "7722": [1133, 1222, 1358, 1629, 653, 359, 861, 920, 224, 3097, 2510, 577, 1108, 3005], "4113": [1521, 3152, 1778, 1232, 861, 2611, 757, 920, 224, 810, 2204, 2549, 2524, 2936, 1387, 83, 2384, 276, 2645, 2501, 1548], "6189": [2665, 1079, 134, 861, 1615, 1649, 920, 224, 3097, 400, 1656, 2696, 2534, 1108, 1764, 2709, 1581, 3054, 855, 2384, 803, 1295, 704, 2645, 1245, 1431, 2737, 2424, 502, 2677, 436], "7194": [2347, 1417, 2052, 1623, 653, 210, 48, 920, 224, 3097, 400, 569], "7099": [194, 2060, 679, 2323, 1094, 3164, 920, 224, 3097, 706, 1147, 569, 2645, 1387], "4774": [1948, 421, 794, 40, 846, 1881, 1649, 920, 224, 3097, 400, 2960, 3032, 3019, 440, 1147, 2238, 2661], "8208": [2846, 2060, 794, 861, 2484, 757, 920, 224, 810, 2204, 1147, 1028, 569, 2734, 2362], "6659": [308, 846, 759, 846, 920, 224, 3097, 400, 2534, 1156, 569, 2384, 584, 1228, 1147, 318, 3044, 1689, 1123, 2184, 440], "8831": [1948, 421, 51, 827, 861, 1114, 3164, 2376, 920, 1907, 1612, 2327, 1656, 2947, 2914], "646": [3048, 1417, 2979, 3084, 4, 2282, 2814, 119, 451, 1630, 1656, 1108, 1387, 3054, 803, 276, 436, 502, 751], "2845": [1550, 1079, 1540, 846, 1881, 48, 920, 224, 810, 3142, 588, 635, 1796, 276, 2424, 2737, 1213, 440], "4148": [1449, 2446, 2801, 653, 1093, 2003, 920, 224, 3097, 1889, 2990, 1231, 383, 257, 569, 2362, 1245, 1113, 1431, 1213, 946, 2709, 1699, 855, 704, 1796, 276, 588, 1764, 2936, 2384, 1295], "2315": [308, 2223, 653, 2243, 2928, 920, 224, 3097, 706, 588, 257, 2362, 1796, 802, 2424, 2645, 2737, 1213, 1028, 3057], "4383": [438, 1222, 1540, 861, 2845, 2063, 920, 224, 3097, 2333, 1607, 928, 3054, 569, 2902, 608, 2362, 436, 1530, 1028], "5443": [2248, 2464, 1540, 2294, 861, 2611, 1777, 920, 224, 3097, 400, 2549, 2524, 2936, 635, 83, 2384, 2501, 276], "1326": [438, 509, 2927, 861, 621, 757, 2814, 119, 451, 957, 2534, 2384, 2645], "2289": [515, 3152, 472, 251, 861, 2611, 3045, 2814, 119, 1644, 2208, 1013, 855, 2764, 704, 276, 821, 1431], "1775": [3048, 2060, 1238, 2928, 2518, 653, 920, 1144, 1761, 760, 588, 635, 2168, 2362, 1796, 2153, 1213, 440], "3619": [194, 221, 747, 2323, 676, 861, 920, 224, 810, 3142, 69, 1147, 929], "470": [1948, 421, 5, 847, 507, 2928, 1605, 777, 3084, 920, 1144, 1761, 760, 1108, 1387, 3054, 803, 436, 502, 1481], "7635": [308, 3152, 653, 210, 2323, 920, 224, 2867, 588, 1108, 257, 1213, 3054, 803, 1796, 2645, 436, 502, 2130], "8498": [839, 509, 712, 653, 1539, 3045, 2814, 119, 1644, 2208, 1656, 1195, 2737, 635, 569, 2168, 3108, 859, 2362, 608, 1570, 276, 2424, 2153, 1548, 1505], "4761": [2554, 1222, 1902, 653, 1539, 1085, 920, 224, 810, 394, 1607, 588, 2549, 2524, 257, 928, 569, 83, 2384, 1530, 1796, 276, 2645, 2424, 2501, 2737, 1213, 751], "6624": [3040, 476, 2801, 861, 2845, 2063, 920, 224, 810, 545, 326, 1108, 1895, 1013, 859, 3014, 1570, 2645, 2914, 2737, 1295, 257, 3054, 569, 1912, 2764, 2362, 2656, 1245, 802, 2424, 1525, 2534, 139, 803, 2062, 1796, 2947, 502, 2335, 2178, 440, 588, 448, 1764, 2384, 608, 436, 1213, 1147, 3057], "7176": [1726, 216, 1301, 2323, 1963, 48, 920, 1907, 2185, 1043, 635, 2153, 2168, 2424, 768, 2737], "2897": [1948, 3152, 1332, 861, 152, 48, 920, 224, 810, 3142, 2077, 395, 569, 3161, 318, 2677, 1525, 2184, 1505], "7588": [3068, 2060, 2104, 861, 468, 653, 920, 224, 3097, 706, 635, 569, 2384, 2936], "4553": [2858, 1535, 1636, 1388, 861, 2484, 757, 920, 224, 3097, 706, 1762, 276, 2645, 751, 2479], "1263": [1726, 2918, 357, 1240, 653, 3017, 846, 920, 1907, 2185, 1043, 2936, 635, 569, 2384, 3044, 1113], "3504": [1640, 2918, 2944, 2024, 861, 736, 2063, 920, 224, 3097, 329, 1656, 2549, 2524, 1223, 2165, 336, 2936, 83, 569, 836, 2409, 440, 2501, 2914, 3044, 2442, 2661, 843, 2335, 1876], "7343": [3048, 2464, 630, 846, 759, 2063, 920, 224, 3097, 1025, 569, 1599, 1147, 440, 2645, 2153, 2228, 69, 1876], "9305": [194, 2864, 653, 210, 1047, 920, 224, 3097, 2510, 1074, 257, 717, 1342, 751, 430, 2760, 2735, 2638, 1505], "4156": [194, 2060, 1238, 653, 210, 653, 920, 224, 3097, 329, 1245, 569, 1764, 2645], "2285": [1051, 2060, 2223, 653, 1499, 2003, 2814, 119, 451, 957, 928, 1530, 1548, 2661, 257, 1606, 2960, 569, 2362, 2409, 946, 2130, 1607, 1195, 83, 276, 440, 2549, 2524, 2936, 635, 2384, 2501, 821, 3088, 3019], "6867": [1449, 378, 964, 861, 152, 846, 920, 224, 3097, 706, 1391, 1108, 2936, 635, 3054, 2384, 803, 2362, 276, 436, 2914, 502, 1147, 1525, 440], "4955": [2347, 911, 2789, 507, 861, 960, 846, 920, 224, 3097, 2510, 569, 3044], "2426": [2858, 911, 2346, 561, 2323, 2897, 2063, 920, 224, 3097, 706, 588, 966, 257, 1158, 928, 569, 2362, 1796, 1548, 1213, 1028, 1627], "9182": [1121, 166, 593, 653, 1403, 48, 920, 224, 3097, 706, 1108, 1391, 1895, 1656, 257, 3054, 569, 1912, 2656, 802, 1525, 2130, 139, 803, 276, 2107, 502, 2178, 440, 635, 608, 436, 768, 1147], "5572": [1133, 2770, 1636, 2928, 1659, 846, 920, 224, 810, 3142, 257, 2936, 2962, 2384, 1608, 2645, 2661], "6939": [308, 3152, 2486, 1911, 861, 2505, 653, 920, 224, 3097, 706, 588, 2524, 2549, 257, 83, 569, 1796, 2501, 2424, 2737, 2409, 1213, 2661], "3372": [2598, 221, 2223, 861, 152, 1085, 920, 224, 3097, 706, 751, 2645, 3057, 440], "4047": [1234, 3152, 640, 653, 359, 861, 920, 224, 3097, 2445, 2549, 2524, 2479, 83, 569, 1762, 1732, 2501, 2734], "85": [1550, 509, 580, 653, 2668, 2282, 920, 224, 810, 2204, 1075, 635, 855, 2061, 704, 318, 1914, 276, 1431, 2737, 2424, 2184], "8249": [454, 2446, 964, 2323, 1963, 2063, 920, 224, 3097, 706, 966, 276, 465, 768, 3057], "4265": [839, 2770, 1466, 1251, 846, 673, 846, 920, 224, 3097, 2510, 588, 257, 2936, 2384, 2362, 1796, 2424, 2737, 1213, 1028, 1147], "4704": [308, 3152, 964, 2928, 1653, 48, 920, 224, 810, 394, 2549, 2524, 1195, 83, 3014, 2501, 2424, 2737, 2677, 1505], "6966": [1234, 3152, 2334, 1125, 2928, 2030, 846, 920, 1907, 2185, 2538, 635, 569, 608, 2645, 763, 751], "8862": [1550, 226, 2928, 3045, 2814, 119, 1644, 2753, 2479, 3061, 2645, 2737, 2677, 1505, 1876, 257, 569, 318, 2424, 69, 2184, 2612, 1342, 83, 1796, 276, 588, 2549, 2524, 1968, 1762, 2638, 2501, 1213], "4304": [1640, 1191, 3155, 1487, 846, 673, 2928, 920, 1144, 1761, 760, 2549, 2524, 83, 2501, 2424, 2737, 2409, 2661], "4328": [1640, 1191, 1254, 561, 653, 1304, 3023, 2814, 119, 1644, 2753, 569, 608, 1147, 2645, 802, 69, 1481, 1876], "9022": [1051, 216, 1301, 2928, 1590, 3164, 920, 1907, 2185, 1043, 1147, 440], "5204": [454, 378, 2334, 2698, 861, 152, 3062, 2814, 119, 1644, 1850, 2661, 2936, 2645, 768, 1895], "4599": [1234, 3152, 964, 653, 2243, 2928, 920, 224, 3097, 706, 704, 1570, 69, 929, 859], "8629": [3048, 433, 504, 653, 210, 48, 920, 224, 3097, 400, 929, 2960, 1387, 3019, 2724, 276, 2424, 2737, 1548, 69, 946], "5442": [1051, 421, 1737, 861, 2484, 3164, 920, 224, 3097, 329, 2549, 2524, 2936, 83, 2384, 2501, 1548], "3173": [1640, 1191, 1371, 861, 107, 510, 2814, 119, 1644, 1850, 1829, 1599, 1891, 2645, 617, 2153, 2737, 2265, 1481, 1505, 2285, 1656, 2661, 929, 569, 1245, 1113, 2424, 3044, 2409, 69, 1801, 1387, 806, 1342, 139, 2168, 1470, 704, 276, 2228, 1764, 2936, 635, 2724, 2638, 3143], "2500": [2554, 1222, 586, 1251, 861, 231, 2323, 920, 224, 3097, 2510, 704, 569], "9019": [1726, 433, 2702, 349, 861, 920, 224, 3097, 400, 1762, 768, 2737, 2424, 2479], "3101": [454, 1079, 930, 861, 152, 2323, 920, 224, 810, 2204, 1764, 569, 859, 2062, 1570, 1245, 1295], "7713": [3048, 2918, 1053, 861, 152, 1281, 2814, 2922, 2293, 2575, 1074, 2015, 430, 2760, 2068, 1839, 69, 1876], "5255": [2605, 1535, 2346, 2928, 473, 1085, 920, 224, 810, 2201, 3108, 276], "6573": [2598, 1191, 2281, 861, 425, 2003, 920, 224, 810, 464, 635, 2061, 276, 2424, 2737, 3057], "9156": [1948, 3152, 2975, 846, 3103, 758, 2814, 119, 451, 124, 1074, 1391, 1108, 859, 2760, 828, 1147, 1570, 1608, 486, 2661, 739, 257, 2130, 2962, 2168, 440, 2502, 2936, 635, 430, 1295, 3019, 3057], "7221": [1449, 1535, 1828, 653, 2243, 2003, 920, 224, 3097, 1997, 588, 257, 1387, 527, 569, 2362, 1796, 1213, 3057], "6523": [1121, 378, 2801, 846, 759, 48, 920, 224, 810, 3142, 1656, 929, 69, 569, 2168, 608, 704, 2153, 1147, 1481], "8977": [2846, 2446, 1622, 3144, 861, 231, 3164, 920, 1907, 1612, 2327, 2990, 1195, 1231, 859, 2362, 1570, 276, 1113], "3108": [194, 1535, 864, 861, 1974, 48, 920, 1907, 2185, 2538], "2341": [2598, 2465, 1053, 861, 2611, 48, 920, 224, 810, 394, 257, 2960, 2912, 2130, 3057, 3019, 1525, 751], "1786": [515, 168, 1053, 653, 1440, 2063, 920, 224, 810, 553, 1108, 139, 3054, 803, 436, 502, 751], "2282": [2554, 2465, 1540, 861, 152, 2063, 920, 224, 3097, 1997, 2960, 139, 3054, 3019, 2902, 436, 1147], "5252": [1449, 221, 2084, 2024, 846, 759, 2063, 920, 224, 810, 754, 2549, 2524, 2661, 1387, 83, 2724, 2501, 2409, 440], "1957": [2069, 2918, 593, 1235, 653, 2668, 3084, 920, 224, 810, 394, 276], "9224": [2665, 294, 452, 846, 1122, 510, 2814, 119, 1644, 2208, 2549, 2524, 2962, 83, 276, 2645, 1608, 2501, 1147, 440], "3915": [194, 1713, 591, 1486, 989, 653, 784, 1085, 920, 1144, 1761, 760, 1607, 2737, 2709, 2936, 635, 928, 569, 2424, 1530, 2661], "1653": [1234, 3152, 794, 861, 152, 3164, 920, 224, 3097, 706, 1108, 859, 1570, 1876, 1656, 257, 2960, 3054, 802, 3044, 69, 3019, 139, 803, 1796, 502, 440, 588, 2902, 2068, 436, 1213, 1147], "1439": [3048, 433, 2, 2928, 473, 846, 920, 224, 3097, 706, 2549, 1968, 2524, 3061, 928, 83, 2319, 2079, 2362, 2501, 2645, 2424, 2737], "7056": [2248, 2918, 2334, 653, 1304, 3023, 920, 224, 810, 918, 635, 569, 2645, 2734], "3112": [89, 619, 51, 1316, 403, 861, 1114, 1586, 846, 1783, 920, 1907, 1612, 2327, 2549, 739, 139, 569, 1178, 2362, 2501, 802, 1525, 2734], "1930": [1521, 307, 2346, 1125, 2323, 2897, 1649, 920, 224, 3097, 2642, 1108, 3054, 569, 803, 436, 821, 2424, 2737, 502], "1952": [1051, 911, 2346, 861, 213, 861, 920, 224, 3097, 706, 2732, 1968, 1391, 3061, 1013, 2764, 1147, 440, 2645, 802, 2424, 2737, 2409, 1854, 2661], "6934": [515, 1943, 1047, 1483, 1649, 920, 224, 3097, 2510, 588, 257, 1796, 276, 802, 2424, 2737, 1213, 751], "4178": [2665, 2918, 490, 653, 1932, 3164, 920, 1907, 2185, 2497, 1245, 569, 1764, 2645], "298": [1726, 509, 2984, 861, 621, 2003, 920, 1907, 2185, 2538, 407, 1829, 1895, 928, 859, 828, 1147, 1570, 2153, 1028, 2679, 1656, 257, 1843, 569, 2362, 1431, 69, 1525, 2130, 1195, 1903, 1342, 139, 855, 2168, 2078, 704, 763, 2854, 921, 2936, 2384, 2638, 2592], "8705": [1051, 1943, 1053, 1047, 2452, 1649, 920, 224, 3097, 706, 1607, 1895, 928, 3054, 569, 2178, 2656, 1530, 436, 2424, 768, 2737, 2734], "1729": [1948, 3152, 2494, 2065, 888, 507, 976, 1034, 2928, 813, 349, 920, 1144, 1761, 760, 1607, 2549, 2524, 1764, 928, 569, 83, 1524, 2501, 1245, 1530, 2409, 1295, 1525], "8800": [2069, 1222, 2903, 2928, 80, 757, 920, 224, 810, 2204, 1108, 884, 3054, 569, 803, 276, 2645, 436, 502], "8843": [2069, 1079, 2323, 676, 2282, 920, 224, 3097, 400, 407, 2534, 718, 257, 929, 2130, 569, 2061, 2384, 2078, 584, 1228, 704, 3104, 1113, 3143, 2265, 69, 1668, 2285], "7869": [839, 1535, 2927, 2323, 1768, 2063, 920, 224, 3097, 2767, 1195, 533, 569, 608, 2362, 2424, 2737], "2138": [1234, 3152, 2785, 507, 1047, 2690, 2323, 920, 224, 3097, 329, 2549, 2524, 2936, 635, 1699, 83, 2384, 2501, 2424, 2737, 1147, 440], "6742": [2248, 378, 504, 653, 2668, 48, 920, 224, 810, 2204, 1656, 588, 257, 1013, 635, 569, 2168, 2764, 608, 1796, 318, 276, 2153, 1213, 1147, 2184], "5714": [839, 2465, 3047, 1719, 1354, 2928, 1605, 2470, 861, 1033, 920, 1907, 1612, 2327, 3143, 440, 1113, 2285, 2265], "201": [2846, 2446, 1937, 589, 653, 210, 1047, 920, 224, 3097, 1889, 1391, 2936, 2962, 2384, 440, 1608, 1147, 2661], "5295": [1550, 2770, 2932, 861, 152, 3164, 920, 224, 3097, 2642, 2534, 1903, 2936, 569, 2384, 286, 3044, 1113, 2661], "8682": [670, 911, 2085, 39, 1047, 2162, 2928, 920, 224, 3097, 329, 2424, 2737], "8889": [1199, 294, 496, 653, 811, 1085, 920, 224, 3097, 706, 440, 1391, 1147], "7111": [1133, 1222, 1902, 3101, 2928, 2198, 2063, 920, 224, 3097, 2642, 2549, 2524, 1013, 83, 2764, 276, 2645, 821, 2424, 2737, 2501, 3057], "361": [89, 2465, 2281, 2323, 2070, 3023, 920, 224, 3097, 400, 2549, 2524, 2912, 635, 83, 2501, 2645, 1525], "934": [1133, 1535, 1238, 653, 210, 2323, 920, 224, 3097, 2510, 635], "7760": [1449, 2060, 1636, 2323, 2658, 2323, 920, 224, 810, 2204, 569, 2645, 763, 1387], "5598": [1133, 2060, 2486, 902, 653, 2668, 3164, 920, 224, 3097, 329, 1607, 928, 569, 1530, 276, 2645, 2424, 2737, 1147], "1025": [308, 3152, 2344, 861, 152, 1281, 2814, 119, 1644, 2753, 1656, 588, 1195, 257, 2912, 2163, 139, 569, 2384, 1796, 1213, 1525], "7471": [3068, 166, 51, 2522, 1725, 861, 960, 3028, 2063, 1905, 920, 1907, 1612, 2327, 2549, 2524, 1387, 83, 2724, 2501, 768, 2424, 2737], "423": [1554, 509, 2082, 2928, 473, 48, 920, 224, 810, 2964, 1391, 139, 3054, 569, 2645, 2424, 436, 2737, 502, 1147, 751, 440], "2891": [2352, 2060, 1540, 653, 2243, 2063, 920, 224, 810, 1102, 2549, 2524, 2912, 928, 569, 2895, 83, 276, 2545, 2424, 2501, 2737, 1548, 1525, 2734], "7296": [1726, 509, 541, 653, 2580, 691, 2814, 119, 1644, 1850, 2737, 1691, 635, 2168, 276, 2424, 2153], "9060": [1121, 2465, 2223, 846, 2787, 1281, 2814, 119, 1644, 1850, 1656, 2960, 2962, 1608, 2645, 2409, 3019, 1481, 2661], "5790": [1199, 619, 1937, 2928, 473, 3164, 920, 224, 3097, 706, 2549, 2524, 1764, 83, 569, 2501, 1245, 2424, 276, 2737, 1987], "2454": [515, 3152, 2223, 71, 2928, 131, 2282, 920, 224, 3097, 2642, 1195, 2362, 2409, 276, 2645, 2424, 2737, 1548], "3285": [1234, 3152, 206, 861, 420, 846, 920, 1907, 1612, 2327, 2549, 2524, 635, 83, 569, 139, 2501, 3044], "8476": [2605, 509, 5, 847, 2190, 507, 958, 820, 846, 2639, 1528, 2466, 48, 2982, 920, 1144, 1761, 760, 635, 1147, 569, 3044, 440], "6986": [670, 2770, 3091, 2928, 1659, 861, 920, 224, 810, 3142, 139, 569, 2384, 859, 1570, 802, 2424, 2737, 1295, 3057], "8120": [3048, 1417, 2820, 861, 468, 1085, 920, 224, 3097, 706, 966, 139, 569, 2168, 1912, 853, 2153, 1525, 440], "2407": [308, 3152, 2903, 861, 152, 3164, 920, 224, 810, 2204, 569, 2168], "6913": [1234, 3152, 930, 861, 152, 349, 920, 224, 3097, 706, 2362], "7390": [515, 3152, 2927, 861, 152, 1649, 920, 224, 3097, 706, 1656, 1662, 2677, 569], "6639": [1948, 421, 3163, 861, 152, 1777, 920, 224, 3097, 2333, 1656, 3088, 69, 1876, 1147], "3486": [2598, 911, 2927, 861, 152, 3164, 920, 224, 3097, 706, 635, 1447, 569, 719, 276, 1113, 1147, 841], "1077": [194, 1713, 1053, 861, 152, 1085, 920, 224, 3097, 706, 2549, 1968, 2524, 1387, 3061, 2153, 83, 2168, 2724, 2501, 2424, 2737], "6187": [1121, 509, 964, 861, 152, 3164, 920, 224, 3097, 1001, 1548, 486, 2502], "1427": [670, 1417, 995, 2928, 473, 48, 920, 224, 3097, 706, 1059, 276], "2097": [3068, 476, 1540, 1047, 3072, 2928, 920, 224, 810, 2204, 3044, 643], "7060": [1726, 1191, 707, 2323, 725, 653, 920, 224, 3097, 1291, 569, 1362, 2362, 390, 3051, 318, 3044, 2341, 1147, 2184, 440], "7371": [2347, 509, 1902, 2323, 2897, 2063, 920, 224, 3097, 706, 588, 1195, 257, 1013, 2764, 2579, 2362, 1796, 2424, 2737, 1213, 1525], "27": [1234, 3152, 2975, 861, 2611, 691, 2814, 119, 1644, 2208, 1570, 276, 768, 859, 2661], "3493": [1726, 221, 2223, 846, 1881, 48, 920, 224, 810, 1102, 1525, 929, 2015, 2502, 2936, 836, 1147, 1839, 276, 69, 486, 3057, 440], "31": [2598, 221, 2797, 846, 1139, 1649, 920, 224, 3097, 400, 588, 2549, 2524, 257, 2479, 1213, 83, 1762, 1796, 318, 2645, 802, 2424, 2737, 276, 2501, 2184, 751], "8697": [1726, 1079, 995, 861, 213, 2063, 920, 224, 3097, 706, 2737, 139, 1362, 859, 2362, 608, 276, 802, 2914, 1113, 2265, 2424, 2501, 3143, 1525, 2285, 390], "7952": [1234, 3152, 964, 861, 213, 1085, 920, 224, 3097, 1997, 2549, 2737, 1387, 1645, 2420, 276, 2501, 2424, 1278, 1147, 440], "726": [1234, 3152, 1478, 653, 524, 2063, 920, 224, 3097, 2510, 1013, 2764, 2362, 276, 2424, 2737, 1028, 1147], "4121": [670, 2060, 712, 846, 612, 3062, 2814, 119, 1644, 785, 2549, 2524, 1387, 2153, 2936, 83, 2168, 2384, 2724, 276, 2645, 2424, 2501, 2737], "6048": [1640, 619, 1036, 653, 2668, 3164, 920, 224, 3097, 706, 2737, 2728, 1028, 717, 257, 569, 2362, 2424, 2409, 139, 83, 1796, 2735, 2549, 2524, 588, 2936, 2384, 2501, 2545, 1213, 1147], "3726": [1726, 619, 2984, 2928, 1661, 653, 920, 224, 810, 2101, 2732, 1108, 2737, 139, 3054, 2168, 803, 859, 2362, 1570, 436, 2424, 2153, 502], "1708": [1951, 3152, 2908, 2108, 861, 231, 861, 920, 1144, 1761, 760, 2936, 569, 2384, 608, 3044, 2424, 2737], "6095": [3040, 619, 1053, 2323, 1734, 1649, 920, 224, 3097, 400, 1656, 2534, 2912, 569, 2384, 608, 1525, 1505], "8511": [1234, 3152, 2066, 1317, 2323, 161, 1085, 920, 1907, 1612, 2327, 2936, 635, 1013, 2384, 2764, 2362, 383, 2645, 3044], "5531": [1951, 3152, 143, 1782, 861, 2484, 846, 920, 224, 3097, 2510, 1764, 2936, 635, 569, 2384, 1245, 2424, 2737, 946, 2661], "4753": [839, 1222, 1798, 653, 359, 653, 920, 224, 3097, 2510, 2962, 1608, 569, 2914, 2362], "438": [2665, 509, 2334, 1047, 2236, 3164, 920, 224, 810, 2964, 1108, 257, 3054, 2902, 803, 2645, 436, 502, 1147, 2130], "8019": [515, 221, 496, 653, 2243, 861, 920, 224, 3097, 706, 2960, 929, 3019, 569, 2168, 1147, 2362, 704, 69], "4880": [1550, 1618, 861, 2484, 2003, 920, 224, 3097, 1889, 1843, 2362, 2424, 2737, 1525, 2679], "1262": [308, 3152, 2851, 2323, 676, 3164, 920, 224, 3097, 706, 257, 3054, 2902, 2362, 1762, 802, 2424, 436, 2737, 768, 2130], "8658": [1951, 3152, 129, 653, 1304, 757, 920, 224, 3097, 1889, 588, 257, 2912, 1895, 1013, 3054, 2764, 2902, 1796, 436, 2424, 3044, 2737, 1213, 1525, 2734], "2717": [2846, 2918, 1081, 2714, 861, 152, 2928, 920, 224, 810, 2204, 1108, 3054, 803, 276, 436, 2645, 502, 1147], "2425": [308, 1371, 861, 107, 691, 2814, 119, 1644, 2208, 1013, 822, 2153, 2728, 1481, 1505, 2661, 1656, 1876, 1606, 2960, 569, 2764, 2362, 2480, 2409, 69, 1195, 1387, 2168, 276, 966, 2936, 635, 3019, 2631], "8059": [1521, 2142, 1077, 861, 1564, 1047, 920, 224, 3097, 329, 276, 2384, 1525, 2936], "6720": [2605, 1535, 923, 1394, 861, 2484, 3164, 920, 224, 3097, 400, 276, 2645, 440], "7567": [1948, 3152, 1636, 846, 673, 2063, 920, 224, 3097, 706, 569, 2384, 1682, 286, 2362], "3692": [839, 433, 964, 653, 2243, 3164, 920, 224, 3097, 706, 1013, 1362, 2764, 2362, 276, 821, 1028, 751, 390], "5169": [89, 166, 1540, 846, 1881, 846, 920, 224, 3097, 1889, 1028, 2384, 2362], "5684": [438, 1222, 2323, 1963, 846, 920, 224, 810, 2204, 467, 2384], "9400": [1133, 1222, 3102, 861, 2484, 3164, 920, 224, 3097, 2510, 1548, 569, 257, 2130], "855": [2846, 1143, 1937, 861, 1594, 3164, 920, 224, 393, 2810, 1968, 2502, 3061, 276, 2424, 2737, 486, 751], "6762": [2605, 307, 937, 48, 102, 2282, 920, 1907, 1612, 795, 2936, 2384, 2661], "2938": [454, 1079, 838, 861, 1955, 1281, 2814, 119, 1644, 2208, 2549, 2524, 1075, 1764, 1559, 83, 569, 1362, 2061, 276, 2645, 1245, 2501, 1505, 390], "9399": [1449, 1079, 2, 861, 1974, 3084, 920, 224, 3097, 2510, 569], "1491": [670, 509, 1056, 2323, 1626, 653, 920, 224, 3097, 1025, 2549, 2524, 1108, 83, 3054, 569, 2168, 803, 2501, 436, 2424, 2737, 502, 3019, 2734], "3900": [1234, 3152, 1920, 861, 1594, 691, 2814, 119, 1644, 2208, 718, 2015, 3105, 928, 822, 1147, 3104, 2645, 2737, 2728, 1028, 2238, 2679, 1656, 257, 2960, 2912, 929, 3032, 1843, 569, 2456, 1912, 2362, 1991, 1431, 2424, 69, 1525, 2130, 2732, 2534, 2734, 1387, 139, 2168, 276, 1839, 1211, 2228, 440, 2039, 2384, 2724, 768, 82, 1295, 3019, 1668, 3057], "8276": [515, 165, 580, 2928, 2198, 846, 920, 224, 3097, 706, 1607, 588, 2549, 1108, 2524, 257, 1213, 928, 3054, 569, 83, 803, 1796, 276, 2501, 436, 768, 1530, 502, 1509], "6964": [1948, 1636, 2928, 2198, 2063, 920, 224, 3097, 400, 2549, 2524, 83, 2501, 2645, 2424, 276, 2737, 1147, 751], "6547": [194, 1079, 640, 2928, 473, 2928, 920, 224, 3097, 706, 588, 257, 1895, 3054, 608, 2656, 1796, 2947, 2645, 436, 1213, 2178], "1866": [2248, 476, 640, 2011, 846, 759, 653, 920, 1144, 1761, 760, 635, 569, 859, 828, 1570, 768, 946], "1551": [515, 1943, 2963, 148, 861, 1320, 846, 920, 224, 3097, 2510, 1903, 569, 2456, 855, 2168, 2362, 704, 1431, 2153], "5535": [1948, 3152, 3047, 989, 861, 960, 3084, 34, 920, 1907, 1612, 2327, 718, 2936, 2384, 2478, 1732, 2594], "1706": [1234, 3152, 2801, 653, 2243, 653, 920, 224, 2867, 588, 257, 139, 1796, 2645, 1431, 1213], "3964": [1554, 2465, 1602, 2995, 653, 210, 1047, 920, 224, 810, 2201, 1656, 257, 569, 276, 69, 2130, 1876], "5226": [2347, 2918, 1937, 2928, 1659, 2282, 920, 224, 3097, 706, 1074, 257, 2912, 2936, 395, 139, 430, 2760, 3161, 276, 1548, 946, 1525, 2661], "1905": [1234, 3152, 2223, 2344, 653, 2243, 3023, 920, 224, 3097, 2767, 1656, 2936, 139, 2384, 1912, 608, 2645, 802, 1147, 1525], "1478": [1554, 216, 1636, 861, 152, 3164, 920, 224, 810, 464, 635, 2075], "3189": [2846, 619, 1053, 2717, 1047, 2236, 48, 920, 224, 3097, 2767, 1391, 1387, 635, 1362, 2384, 2362, 390, 2645, 1548, 1147, 1505, 440], "3431": [2554, 2464, 2223, 861, 213, 1777, 2814, 119, 1644, 2753, 1548, 276], "5283": [515, 294, 1238, 861, 2484, 3164, 920, 224, 3097, 329, 139, 928, 569, 802, 3044, 1028, 1147, 440], "5335": [1521, 1535, 2223, 653, 1304, 1649, 920, 224, 810, 1927, 588, 2506, 1108, 257, 1387, 502, 3054, 569, 2168, 859, 2362, 803, 1570, 1796, 2645, 276, 436, 1213, 1147], "4217": [2858, 2465, 964, 861, 213, 2063, 920, 224, 3097, 706, 1968, 1391, 2936, 3061, 2384, 2362, 2424, 2737, 1028, 1147, 3057, 440], "6059": [839, 2770, 955, 2928, 1126, 1777, 2814, 119, 451, 957, 588, 257, 1342, 533, 1796, 2638, 276, 2424, 2737, 1213], "8482": [1521, 1943, 2292, 656, 861, 1114, 3084, 920, 1144, 1761, 760, 1013, 2677, 183, 2629, 2764], "3232": [1948, 3152, 930, 702, 653, 210, 1649, 920, 224, 810, 2964, 588, 1108, 2737, 257, 2660, 1213, 3054, 2168, 2384, 803, 2362, 1796, 802, 2424, 436, 2153, 502, 1028], "8042": [1951, 3152, 1902, 1807, 653, 2243, 846, 920, 224, 3097, 706, 2534, 569, 2384, 2424, 2737, 2677, 440], "2310": [2598, 1222, 640, 653, 210, 48, 920, 224, 3097, 400, 1656, 2524, 2549, 1895, 83, 3054, 2178, 2656, 2501, 436, 2424, 2737, 751], "2702": [1550, 216, 2430, 861, 1974, 48, 920, 224, 3097, 1291, 1391, 635, 139, 1147, 751, 440], "3312": [438, 911, 2963, 861, 44, 3164, 920, 1907, 2185, 1043, 1645, 2534, 276, 2384], "8654": [2665, 166, 2928, 2485, 1047, 920, 224, 3097, 2510, 588, 257, 1559, 569, 859, 1796, 1570, 1213], "3264": [3068, 294, 712, 653, 2331, 3045, 2814, 119, 1644, 2208, 1656, 2168, 635, 276, 2153], "4136": [2347, 1079, 2801, 2380, 2323, 1963, 2003, 2814, 119, 1644, 2414, 390, 2424, 1362, 2645, 2737], "5667": [1951, 2770, 472, 653, 2331, 2330, 2814, 119, 1644, 2208, 588, 257, 1342, 1796, 276, 2645, 2638, 1213, 1028, 1147], "7615": [2846, 2446, 640, 653, 210, 846, 920, 224, 3097, 706, 1656, 2015, 1856, 1839, 2725, 3108, 1147], "7228": [2554, 378, 2346, 846, 3103, 2282, 920, 224, 810, 1102, 2960, 928, 569, 2384, 1682, 2362, 1762, 276, 768, 1548, 3019], "5276": [1726, 2465, 630, 861, 2172, 861, 920, 224, 3097, 400, 1108, 2015, 139, 3054, 1856, 2168, 803, 2362, 1839, 436, 2153, 1548, 502], "5978": [1234, 3152, 2908, 507, 2323, 1427, 861, 920, 1144, 1761, 760, 2549, 2524, 83, 2501, 2424, 2737], "3862": [1640, 3152, 2486, 2928, 1659, 48, 920, 224, 3097, 400, 1607, 1656, 2660, 1895, 928, 569, 3054, 2656, 276, 436, 1530, 2178], "1172": [2248, 911, 1540, 2994, 861, 2484, 3164, 920, 224, 810, 272, 1607, 2936, 928, 3054, 569, 2902, 2384, 2362, 436, 1530], "8312": [454, 2464, 1540, 861, 2484, 48, 920, 224, 810, 2204, 1147, 1391, 2061, 569, 440], "6214": [1726, 166, 2281, 861, 152, 2282, 920, 224, 3097, 706, 2549, 2524, 635, 139, 83, 2501, 2645, 1548, 3057], "5121": [2846, 476, 949, 861, 2611, 1085, 920, 224, 810, 3142, 588, 2549, 2524, 257, 83, 569, 855, 704, 1796, 276, 2645, 1431, 3044, 2501, 1548, 1213, 1147, 751], "7903": [670, 166, 1937, 653, 2668, 2323, 920, 224, 3097, 2874, 2549, 2524, 2960, 83, 569, 2501, 1211, 3019], "2981": [2605, 1222, 2354, 2323, 2704, 2323, 920, 224, 3097, 1870, 588, 257, 1387, 1645, 569, 855, 2384, 704, 1796, 2645, 1431, 3044, 1213, 763, 2661], "17": [194, 433, 2548, 2150, 2928, 892, 3164, 920, 224, 3097, 329, 1607, 2710, 257, 2936, 928, 3054, 569, 139, 2629, 2362, 2384, 2902, 436, 768, 1530, 2130], "4094": [2352, 476, 3022, 2928, 1884, 846, 920, 224, 3097, 2510, 2912, 139, 569, 1228, 584, 1525], "7948": [1640, 1191, 1798, 2928, 1616, 1047, 920, 224, 3097, 706, 1195, 569, 802], "3728": [308, 3152, 2984, 653, 210, 48, 920, 224, 810, 3142, 1699, 569, 704, 2424, 3044, 2737], "1000": [1951, 165, 677, 861, 2484, 2063, 920, 224, 810, 1031, 2180, 2613], "94": [1948, 1565, 2346, 861, 1594, 846, 920, 224, 810, 2204, 588, 257, 928, 569, 2895, 2168, 608, 1796, 318, 276, 2153, 1213, 2184], "4400": [3048, 684, 947, 2928, 2055, 1047, 920, 224, 3097, 1025, 318, 2645, 768, 2424, 2737, 2184], "4184": [2554, 3152, 2156, 861, 1974, 861, 920, 224, 3097, 2510, 1391, 1764, 635, 928, 569, 139, 802, 2645, 1245, 768, 1147, 1509, 440], "9056": [2554, 216, 2346, 2323, 2766, 2003, 2814, 119, 451, 957, 1607, 1195, 1764, 1013, 533, 928, 569, 2168, 2764, 859, 1530, 1570, 276, 1245, 2153], "1084": [1199, 2770, 3102, 2928, 2145, 48, 920, 1144, 1761, 760, 1607, 2549, 1075, 2524, 928, 569, 83, 2061, 2501, 1530, 751], "8799": [454, 166, 382, 861, 231, 2063, 920, 1907, 1612, 2777, 1656, 2936, 569, 2384, 802, 3044, 2409, 2661], "7266": [308, 3152, 1540, 861, 425, 1649, 920, 224, 2867, 748, 2549, 1968, 2524, 1764, 2479, 3061, 83, 569, 1762, 2501, 276, 1245, 2645], "6727": [1121, 216, 2932, 2323, 2070, 1085, 920, 224, 810, 18, 1108, 1362, 383, 2153, 2737, 1656, 1075, 3054, 569, 1912, 2362, 2424, 2409, 1525, 83, 139, 2061, 2168, 803, 502, 2549, 2524, 2384, 2501, 436, 3108, 1295, 1147, 1493, 390], "6193": [3040, 221, 2873, 861, 2611, 510, 2814, 119, 1644, 1370, 2534, 257, 635, 2384, 853, 276, 2130], "1795": [670, 1191, 899, 1142, 846, 3003, 1085, 920, 224, 3097, 705, 1607, 1656, 928, 569, 2914, 1530], "6998": [1121, 226, 2355, 653, 2668, 861, 920, 224, 3097, 706, 966, 2912, 1342, 1013, 1505, 1362, 2764, 2638, 2645, 2424, 2737, 1525, 3057, 390], "5421": [1550, 911, 2263, 846, 2787, 266, 2814, 119, 1644, 1850, 2990, 1074, 1391, 1895, 1231, 859, 2760, 383, 1570, 2780, 2153, 2677, 1656, 569, 162, 2478, 2362, 862, 1245, 802, 1431, 1113, 2409, 3044, 69, 2534, 139, 2168, 2643, 704, 2947, 448, 440, 1764, 2574, 2384, 430, 1810, 2442, 1147], "5031": [3068, 509, 2404, 653, 2044, 2928, 920, 224, 810, 8, 1391, 1108, 2936, 3054, 2384, 569, 803, 608, 2902, 436, 2645, 502, 1147, 440], "1235": [1234, 3152, 2140, 861, 1594, 691, 2814, 119, 1644, 2208, 2549, 2524, 2661, 1391, 928, 83, 276, 2501, 2409, 1147, 440], "9201": [2665, 911, 1603, 861, 1974, 2928, 920, 224, 3097, 329, 2534, 1013, 2384, 2764, 2362, 440], "8746": [2347, 216, 861, 2484, 861, 920, 224, 810, 464], "4727": [454, 433, 49, 2394, 653, 359, 861, 920, 224, 3097, 329, 2549, 2524, 3057, 1895, 83, 3054, 569, 2656, 2362, 2501, 436, 1028, 2178], "3441": [2598, 1713, 1636, 1177, 2928, 2550, 3164, 920, 224, 3097, 706, 2549, 2524, 1156, 83, 569, 608, 276, 2645, 2501, 1548, 1689, 465], "3927": [438, 294, 2121, 1433, 653, 811, 2063, 920, 1907, 1612, 2327, 1548], "7579": [2665, 378, 1798, 861, 2484, 3164, 920, 224, 3097, 329, 383, 1147, 750, 440], "7218": [2846, 2005, 964, 1894, 653, 1304, 2063, 920, 224, 3097, 706, 1607, 2737, 1342, 635, 1645, 928, 569, 2638, 2424, 1530], "7438": [2248, 476, 593, 2323, 676, 1085, 920, 224, 3097, 706, 966, 2960, 2912, 929, 69, 635, 569, 3019, 608, 584, 1228, 704, 276, 768, 946, 1525, 1945, 1876], "8204": [2858, 221, 3047, 827, 861, 1114, 1586, 846, 716, 920, 1907, 1612, 316, 1108, 3054, 803, 2362, 436, 502, 1028], "5529": [2665, 166, 29, 1047, 555, 861, 920, 224, 3097, 706, 2549, 2524, 635, 1013, 83, 2764, 2501, 2645, 2424, 2737], "7139": [438, 1417, 143, 846, 3103, 3164, 920, 224, 810, 3142, 1607, 1387, 2936, 928, 569, 2384, 2724, 276, 1530], "894": [839, 1535, 2903, 3101, 861, 621, 1085, 920, 224, 810, 2234, 1656, 139, 802], "1920": [2347, 307, 2903, 2928, 188, 757, 2814, 119, 451, 1119, 2549, 2524, 2912, 1013, 83, 2764, 318, 802, 2723, 2424, 2737, 3044, 276, 2501, 768, 1525, 2184], "3819": [2665, 1417, 653, 359, 2323, 920, 224, 3097, 2510, 1656, 569, 802, 3057], "7199": [2598, 1943, 937, 861, 420, 2063, 920, 1907, 1612, 2327, 139, 440], "256": [1948, 1565, 949, 653, 2668, 1649, 920, 224, 810, 1102, 2549, 2524, 2153, 83, 2168, 2362, 2501, 2645, 2424, 2737, 2677], "8676": [1550, 684, 1219, 3084, 2422, 3164, 920, 224, 3097, 400, 2549, 2524, 635, 83, 569, 608, 2501, 318, 2184], "7876": [1521, 1943, 2121, 1617, 861, 231, 48, 920, 224, 3097, 1291, 1147, 2725, 569, 1028, 2362], "8191": [515, 1222, 956, 861, 44, 3164, 920, 224, 3097, 400, 1391, 929, 1387, 569, 1147, 704, 69, 2335, 440], "9212": [89, 2446, 1636, 2928, 473, 3164, 920, 224, 3097, 400, 966, 2737, 1764, 2912, 928, 569, 855, 2362, 704, 1245, 2424, 1431, 1530, 768, 1295, 1028, 69, 1525, 3057, 1876], "7027": [308, 1011, 56, 861, 1564, 1649, 920, 224, 3097, 2363, 1656, 2737, 751, 1843, 2424, 3143, 2265, 1113, 768, 2679, 2285, 440], "8115": [3040, 294, 640, 653, 2668, 48, 920, 224, 3097, 706, 2962, 276, 751], "4039": [308, 3152, 1081, 633, 861, 2484, 2928, 920, 224, 3097, 1889, 2549, 2524, 2479, 83, 1762, 2501], "2031": [1449, 165, 2778, 1047, 555, 2928, 920, 224, 3097, 400, 2990, 2912, 2168, 1231, 768, 1113, 2153, 1525], "8727": [2665, 2770, 1902, 861, 152, 846, 920, 224, 3097, 2767, 2912, 2936, 635, 2384, 276, 2645, 2424, 2737, 946, 1525], "5449": [194, 1222, 472, 653, 1304, 1777, 920, 224, 2867, 588, 1195, 1391, 257, 855, 704, 1796, 318, 1431, 3044, 1548, 1213, 1147, 2184, 440], "2968": [454, 2918, 2778, 653, 57, 861, 920, 224, 3097, 2510, 2912, 1013, 928, 2764, 2319, 3130, 276, 2645, 3044, 1525, 2631], "4042": [2248, 1079, 3013, 861, 2611, 3116, 2814, 119, 1644, 1850, 2549, 2524, 83, 569, 2168, 2501, 2645, 2153, 2409, 2367], "8054": [670, 433, 2786, 861, 2555, 2063, 920, 224, 3097, 706, 1656, 326, 1195, 635, 139, 2384, 608, 2362, 3004, 802, 2645, 2676, 1260, 440], "4077": [1199, 294, 1053, 861, 2484, 3164, 920, 1907, 1612, 795, 569], "7597": [194, 433, 2789, 656, 2928, 1679, 846, 920, 224, 3097, 329, 2709, 1895, 635, 3054, 569, 2178, 859, 2656, 1570, 2645, 436, 1481, 751], "7825": [2605, 2142, 1053, 653, 1569, 1085, 920, 224, 3097, 400, 3161, 395, 635], "3268": [3048, 509, 2702, 2323, 2298, 2063, 920, 224, 3097, 706, 2549, 2524, 83, 2501, 2645, 276, 2424, 2737], "9063": [1133, 1191, 2778, 1047, 1458, 1649, 920, 224, 3097, 400, 1764, 2709, 2912, 1342, 569, 1599, 2638, 276, 821, 1245, 2153, 2228, 1525, 440], "7517": [2347, 1417, 2928, 2518, 349, 920, 1144, 1761, 760, 276, 2384, 2645, 2936], "7606": [438, 433, 2281, 40, 653, 2331, 48, 920, 224, 810, 394, 635, 2684, 569, 3044, 608], "8131": [3068, 509, 2778, 2286, 861, 745, 653, 920, 224, 3097, 400, 1342, 928, 2319, 2638, 276, 3044, 2442], "5918": [2846, 2918, 2482, 1542, 507, 1256, 653, 2853, 1047, 3043, 920, 1907, 1612, 2160, 929, 569, 2168, 2362, 2153, 2409, 69, 1525], "2211": [515, 221, 2, 653, 784, 3164, 920, 224, 3097, 1001, 588, 2549, 2524, 257, 2912, 2936, 1213, 83, 1796, 276, 2501, 1295, 3057, 1147, 1525, 751, 2661], "3328": [1521, 1079, 496, 846, 1881, 1281, 2814, 119, 1644, 2414, 635, 2645, 1548, 2677, 1147, 440], "453": [3068, 2446, 2984, 653, 1225, 2282, 920, 1907, 2185, 2538, 2549, 2524, 1764, 83, 569, 2384, 2501, 1245, 2424, 2645, 2737], "6041": [1640, 619, 3013, 653, 1093, 1174, 2814, 119, 1644, 1198, 928, 3054, 2902, 276, 436, 2645, 1530], "2608": [2665, 433, 1622, 989, 861, 1974, 48, 920, 1144, 1761, 760, 1656, 929, 139, 569, 2384, 1147, 69], "3741": [2248, 1535, 2223, 861, 213, 48, 920, 224, 3097, 706, 1607, 1108, 2936, 928, 3054, 569, 2384, 803, 859, 1570, 276, 436, 1530, 502], "6568": [3068, 221, 2801, 653, 2668, 1047, 920, 224, 810, 3142, 1656, 588, 257, 929, 2015, 139, 569, 2168, 2362, 704, 1796, 1839, 1213, 69, 1525, 1876], "3705": [1234, 3152, 653, 359, 2323, 920, 1144, 1761, 760, 966, 1178, 2384, 2643], "6722": [1726, 2864, 964, 861, 213, 48, 920, 224, 810, 2204, 1387, 139, 2724, 802, 2424, 2737, 3057], "4960": [1640, 1417, 593, 2323, 2289, 48, 920, 224, 3097, 400, 635, 1013, 2764, 276, 768, 1548, 2677], "5840": [1133, 1535, 955, 846, 1122, 757, 920, 224, 3097, 1889, 2612, 2936, 635, 2384, 2545, 2661], "650": [1554, 3152, 1538, 2615, 846, 3103, 2063, 920, 224, 3097, 706, 569, 2645], "7046": [2347, 1535, 846, 1881, 3045, 2814, 119, 1644, 404, 1673, 2660, 529, 3024, 2677, 2728], "5184": [454, 476, 2223, 861, 213, 1085, 920, 224, 810, 1369, 2990, 326, 1231, 859, 584, 1228, 1147, 1570, 1608, 2153, 2737, 2676, 1481, 1876, 1656, 257, 2960, 2912, 929, 3054, 569, 1912, 2362, 1245, 802, 1113, 2424, 2409, 69, 1525, 2130, 1195, 2534, 2709, 2962, 139, 1856, 2168, 704, 276, 440, 3050, 1764, 2384, 2902, 3117, 608, 436, 3108, 3088, 3019, 2631], "7318": [1199, 1222, 1852, 861, 1974, 2063, 920, 224, 3097, 400, 2737, 855, 704, 768, 1431, 2424, 2734], "2668": [1133, 2446, 143, 2717, 861, 2484, 861, 920, 224, 3097, 2510, 635, 139, 2168, 569, 2645, 2153, 763], "2591": [1234, 3152, 955, 861, 1594, 2003, 920, 224, 810, 2109, 2015, 853, 584, 1228, 3130, 2737, 2728, 2894, 1656, 257, 1606, 569, 2456, 2362, 2424, 69, 2130, 803, 1796, 276, 1839, 1844, 440, 588, 635, 2384, 1810, 1213, 1147, 3057], "7559": [1948, 421, 2797, 861, 152, 2063, 920, 224, 3097, 400, 2479, 2362, 1762, 768, 2424, 2737, 1028, 2734], "7707": [2347, 2864, 964, 653, 2243, 2063, 920, 224, 3097, 706, 2384], "7160": [1121, 226, 640, 861, 2484, 3164, 920, 224, 3097, 706, 1195, 139, 2362, 802, 1028, 2734], "1297": [2846, 421, 1636, 653, 1225, 3164, 920, 224, 3097, 706, 2936, 2962, 2479, 2384, 1362, 1762, 1608, 3044, 3057, 2734, 390], "5205": [1121, 294, 1053, 653, 2243, 1649, 920, 224, 3097, 27], "2085": [1521, 1191, 1603, 2323, 2610, 3084, 920, 1144, 1761, 760, 2343, 2534, 2384], "1727": [2347, 1222, 2099, 2928, 1659, 861, 920, 224, 3097, 400, 2549, 2524, 2479, 533, 83, 569, 608, 1762, 2501, 2645, 768, 2424, 2737], "7554": [438, 476, 1045, 2323, 1504, 3164, 920, 224, 3097, 400, 884, 635, 569, 2424, 2737, 1147, 440], "3170": [1051, 1943, 452, 2928, 473, 1281, 2814, 119, 1644, 2414, 2534, 257, 2384, 1147, 2130, 440], "4030": [3068, 2446, 1901, 653, 2243, 2003, 920, 224, 3097, 706, 2384, 3051, 2068, 2424, 3044, 2737], "3067": [2352, 2918, 2306, 653, 2668, 3164, 920, 224, 810, 3142, 1656, 1548, 257, 2130, 440], "4134": [515, 221, 2928, 1659, 3164, 920, 224, 810, 3142, 2677, 276, 2645, 1387], "6856": [2347, 378, 471, 362, 861, 152, 2003, 2814, 119, 451, 1134, 588, 1108, 257, 1606, 502, 3054, 803, 1796, 436, 2645, 1213], "2745": [1951, 165, 955, 2928, 473, 1085, 920, 224, 810, 2204, 1607, 2737, 1895, 635, 928, 569, 2168, 2384, 2362, 1530, 276, 2424, 768, 2153, 2409, 2661], "6666": [438, 1417, 2548, 861, 1974, 3164, 920, 224, 3097, 329, 588, 2350, 1108, 257, 2015, 635, 928, 3054, 1213, 803, 1796, 276, 802, 1839, 3092, 436, 502, 1745], "395": [2347, 166, 653, 1499, 653, 920, 224, 810, 394, 2534, 929, 569, 855, 2384, 608, 2362, 1147, 704, 1431, 69, 2130, 440], "1098": [839, 619, 143, 861, 468, 2928, 920, 224, 3097, 1025, 1607, 2524, 588, 2549, 257, 928, 569, 2384, 83, 1796, 276, 2501, 2645, 1530, 1213], "7987": [1199, 1191, 707, 653, 210, 3084, 920, 1144, 1761, 760, 2549, 2524, 588, 257, 2962, 2153, 83, 2168, 1796, 1608, 2501, 2424, 2737, 1213], "7886": [2554, 294, 2440, 1931, 2323, 2704, 653, 920, 224, 3097, 1291, 588, 1656, 139, 1796, 2645, 1213, 1147, 440], "3897": [515, 294, 964, 861, 152, 846, 920, 224, 3097, 706, 1607, 928, 569, 2384, 276, 1530], "411": [1521, 3152, 135, 2323, 676, 2063, 920, 224, 3097, 400, 1645, 2153, 2912, 3054, 569, 318, 1525, 2184, 1387, 139, 2168, 3161, 276, 2947, 440, 395, 2384, 2902, 608, 436, 768, 1147], "8315": [1234, 3152, 413, 300, 1047, 555, 846, 920, 224, 3097, 706, 946, 1525, 3044, 2178], "5345": [1550, 2464, 51, 2046, 861, 231, 48, 920, 1907, 1612, 2327, 2936, 569, 2384, 286, 3044, 64], "6385": [1726, 2918, 937, 653, 784, 48, 920, 224, 3097, 1989, 1013, 2764, 2661], "3828": [1726, 433, 2263, 846, 2410, 266, 2814, 119, 1644, 2208, 1391, 718, 2691, 1895, 928, 822, 1228, 584, 853, 1530, 1548, 2728, 2136, 2238, 1481, 1876, 2661, 1587, 257, 929, 3032, 2274, 569, 162, 2098, 2362, 2429, 1431, 2475, 3044, 1113, 598, 2409, 946, 69, 2184, 2130, 64, 2970, 2115, 2534, 1864, 1156, 2612, 24, 139, 2168, 2629, 2643, 1470, 704, 276, 1062, 1420, 1052, 1689, 2854, 440, 1180, 2936, 635, 2617, 2359, 2384, 883, 608, 601, 133, 2501, 768, 82, 1295, 1147, 1753, 3057], "3954": [1948, 421, 2801, 2323, 2658, 2928, 920, 224, 810, 2204, 588, 1213, 1796, 257], "889": [2846, 1713, 964, 653, 2243, 2063, 920, 224, 3097, 706, 1391, 753, 569, 1987, 318, 2409, 1147, 2184, 440], "3227": [2352, 216, 1902, 2344, 653, 2243, 2282, 920, 224, 810, 545, 569, 751, 2362], "3403": [3068, 1943, 923, 653, 210, 3164, 920, 224, 3097, 2510, 2549, 2524, 83, 569, 2501, 1548], "1468": [1521, 1535, 964, 2448, 2928, 1659, 2282, 920, 224, 3097, 1889, 588, 1195, 1108, 257, 635, 1213, 928, 3054, 569, 803, 2362, 1796, 436, 2424, 768, 2737, 502, 1147], "369": [1234, 3152, 846, 1881, 3164, 920, 224, 2867, 1607, 326, 2534, 1662, 2734, 635, 928, 569, 2384, 608, 2362, 802, 3044, 821, 1530, 2676, 1028, 763, 751], "9213": [2846, 2464, 2106, 846, 1881, 1047, 920, 224, 3097, 2510, 139, 2645, 3044, 2362], "6375": [454, 378, 49, 2024, 653, 784, 653, 920, 224, 3097, 329, 2549, 2524, 1895, 83, 569, 3054, 2902, 2656, 2501, 2645, 2424, 436, 2737, 2178], "6638": [308, 3152, 1540, 2928, 473, 3164, 920, 224, 3097, 706, 2990, 1656, 569, 1231, 276, 1113, 2677, 1147, 1525, 440], "4597": [89, 2464, 1624, 1832, 861, 1974, 2323, 920, 224, 2798, 606, 2664, 3044], "1128": [1948, 1565, 2663, 653, 210, 3164, 920, 1907, 1612, 2777, 1514, 2661, 2936], "4048": [1121, 2770, 60, 861, 1974, 2063, 920, 224, 810, 1161, 3161], "5621": [1948, 1565, 51, 1942, 1354, 861, 960, 3028, 2063, 1549, 920, 1907, 1612, 2327, 1876, 2960, 2936, 3019, 69, 751, 2661], "2448": [1948, 1565, 868, 861, 420, 846, 920, 224, 3097, 706, 1195, 929, 635, 569, 2384, 2362, 3044, 69], "5386": [1521, 307, 964, 2323, 2766, 2063, 920, 224, 3097, 1889, 2549, 1993, 1075, 2524, 588, 257, 2936, 2130, 635, 928, 83, 2061, 2384, 1796, 276, 2501, 2424, 2737, 1548, 1213, 751], "835": [1199, 1417, 2801, 861, 2484, 3164, 920, 224, 810, 394, 1074, 1656, 2534, 2936, 635, 139, 569, 2384, 430, 2760, 2645, 286, 1113, 2661], "200": [1951, 421, 2975, 861, 213, 2919, 2814, 119, 451, 2450, 1656, 1764, 2479, 1013, 569, 855, 2764, 3112, 704, 1762, 318, 1245, 3044, 1431, 2737, 2424, 2184, 399], "787": [1199, 2060, 180, 653, 846, 920, 224, 3097, 400, 569, 2813, 2983], "805": [1133, 378, 1540, 653, 2668, 3023, 920, 224, 810, 2204, 1391, 2960, 3019, 3051, 276, 1245, 1147, 440], "6182": [1234, 3152, 2, 1047, 2063, 920, 224, 3097, 706, 1656, 1108, 3054, 803, 436, 2645, 502, 751], "3528": [2554, 619, 2281, 861, 2484, 2003, 920, 224, 3097, 2767, 588, 1108, 257, 1213, 3054, 803, 1796, 436, 502, 1028, 1147, 2734], "6250": [194, 2864, 854, 653, 2243, 1777, 2814, 119, 451, 124, 1656, 326, 2115, 569, 2168, 859, 2265, 1570, 2409, 276, 1113, 440, 2153, 1548, 2676, 3143, 69, 1525, 1481, 2285, 1876], "5088": [1948, 421, 1053, 2928, 473, 2282, 920, 224, 3097, 2767, 2549, 2524, 1387, 83, 2501, 2645, 2424, 2737, 751], "9236": [515, 165, 3047, 861, 2861, 3164, 920, 1907, 1612, 2327, 1656, 569, 2409, 2677, 1147, 1481, 2661], "2963": [2846, 1713, 3077, 861, 2297, 1649, 920, 224, 3097, 706, 1764, 569, 2384, 1245, 2677, 763], "3660": [2347, 476, 134, 861, 1974, 48, 920, 224, 3097, 400, 1656, 94, 569, 2384, 2362, 1762, 1113, 3044, 1548, 2180, 2661], "619": [89, 1417, 2223, 846, 1122, 3045, 920, 224, 3097, 2642, 1391, 3061, 1362, 2645, 2737, 1028, 1656, 569, 1245, 2424, 1387, 83, 276, 440, 2549, 1968, 2524, 1764, 2724, 2501, 1147, 2734, 390], "3472": [1121, 216, 3047, 1719, 989, 1047, 31, 861, 1033, 920, 1907, 2302, 896, 588, 1195, 257, 929, 1387, 569, 608, 2362, 704, 1796, 802, 2645, 1213, 69], "2657": [2352, 2060, 1186, 861, 2484, 2063, 920, 224, 810, 1102, 928, 569, 257, 2130, 139], "2527": [1449, 1222, 1053, 653, 210, 1085, 920, 224, 3097, 2333, 1028, 1147, 3057, 2912], "6938": [1051, 509, 1883, 2928, 2145, 3084, 920, 224, 3097, 706, 2534, 2384, 2645, 440], "205": [1951, 3152, 1053, 653, 1280, 861, 920, 224, 810, 2201, 635, 569, 2645, 2061], "1782": [2665, 2060, 580, 861, 2611, 2282, 920, 224, 3097, 706, 2534, 2362], "7833": [1640, 509, 2334, 2850, 846, 1881, 1777, 2814, 119, 451, 1134, 1391, 1387, 2962, 635, 2936, 2384, 1608, 1147, 440], "367": [2605, 1535, 964, 861, 468, 2063, 920, 224, 3097, 706, 2990, 3105, 1231, 859, 828, 853, 3104, 1570, 1548, 1505, 1656, 1606, 569, 2362, 318, 802, 1113, 3044, 946, 2184, 1195, 2660, 139, 2629, 1732, 2889, 2384, 608, 183, 1295], "3379": [2665, 911, 1902, 861, 2611, 3164, 920, 224, 3097, 1997, 739, 1108, 139, 569, 3054, 803, 2362, 436, 502, 2734], "9357": [1951, 2770, 653, 1225, 2928, 920, 224, 3097, 706, 588, 1108, 1764, 257, 1342, 635, 1213, 3054, 569, 803, 608, 1796, 276, 1245, 3044, 2638, 436, 1548, 502, 768], "8380": [2598, 684, 322, 2779, 846, 654, 846, 920, 224, 810, 1161, 2936, 139, 569, 802, 286, 2661], "1329": [2858, 216, 2256, 632, 507, 846, 3003, 1566, 1047, 920, 1144, 1761, 760, 1147, 2068, 569, 440], "8224": [2858, 166, 2281, 861, 152, 2330, 920, 224, 3097, 706, 1108, 928, 1530, 2677, 2661, 257, 569, 3054, 2409, 1607, 1387, 139, 803, 1796, 276, 502, 588, 2936, 635, 2384, 608, 821, 436, 1213, 3057], "318": [2858, 1417, 396, 1083, 861, 1974, 846, 920, 224, 3097, 329, 2735, 2677, 2384, 717, 2936], "8852": [1199, 509, 653, 2668, 846, 920, 224, 3097, 1291, 1391, 2912, 855, 704, 1431, 1147, 1525, 751, 440], "4849": [1234, 3152, 1068, 1396, 653, 2668, 846, 920, 224, 3097, 2151, 2549, 2524, 83, 569, 1856, 608, 2501, 2424, 2737, 751], "5925": [2605, 2465, 794, 2323, 1963, 48, 920, 224, 810, 2204, 2549, 2524, 635, 83, 2501, 2645, 2424, 2737, 751], "8203": [1449, 1535, 2223, 2928, 473, 2003, 920, 224, 810, 464, 2912, 1342, 569, 2384, 2638, 276, 768, 2424, 2737, 946, 1525], "2789": [2858, 476, 471, 3029, 2323, 2070, 1085, 920, 224, 3097, 1889, 2549, 2524, 2660, 83, 2384, 276, 2501, 768, 1548], "841": [1550, 1618, 640, 2928, 1659, 846, 920, 224, 3097, 2510, 1993, 257, 2912, 929, 1013, 928, 2384, 2764, 859, 1147, 704, 1570, 69, 1525, 2130], "3488": [438, 1417, 786, 846, 3103, 48, 920, 224, 3097, 706, 635, 139, 276, 1113, 3044, 2409, 751], "7456": [1726, 1191, 642, 861, 142, 846, 3003, 920, 1907, 1612, 2327, 1662, 2912, 2479, 1762, 2645, 2424, 2737, 1525], "7145": [1449, 216, 2975, 3167, 861, 213, 1174, 920, 224, 3097, 1889, 326, 1108, 2479, 2737, 2676, 1876, 257, 3054, 2362, 2424, 1387, 139, 803, 1796, 276, 502, 350, 588, 2724, 1762, 436, 3108, 1213, 2631, 2734], "1710": [1199, 1191, 955, 3132, 653, 1304, 3023, 920, 224, 810, 394, 2549, 2524, 2502, 1387, 83, 2724, 2362, 3051, 2501, 2424, 3044, 2737, 1028, 1147, 486], "1702": [308, 1828, 653, 1304, 2282, 920, 224, 3097, 706, 2549, 2524, 929, 533, 83, 139, 2362, 2501, 1028, 69], "8144": [670, 1222, 2778, 653, 856, 653, 920, 224, 810, 3142, 635, 276, 2384, 751, 2362], "5595": [2665, 1417, 1129, 653, 1569, 1649, 920, 224, 3097, 1997, 1387, 3054, 569, 2902, 436, 763], "1885": [1726, 476, 357, 1931, 2323, 2704, 846, 920, 1907, 1612, 2327, 1570, 2645, 1113, 859], "6510": [2846, 2918, 3047, 827, 861, 800, 1137, 2063, 2271, 920, 1907, 1612, 2327, 2728, 1903], "7954": [3068, 1713, 979, 2928, 1659, 2063, 920, 224, 810, 553, 1548, 966, 276, 1178], "2297": [2605, 1191, 2307, 1551, 1047, 2634, 2282, 920, 1144, 1761, 760, 1656, 139, 569, 440, 276, 2409, 69, 1876], "4308": [3048, 2864, 1623, 2928, 2518, 653, 920, 1144, 1761, 760, 635, 1548], "6903": [2665, 1222, 964, 653, 511, 2282, 920, 224, 3097, 706, 588, 257, 1796, 3051, 276, 3044, 1213], "4092": [1121, 433, 29, 2928, 1659, 861, 920, 224, 3097, 706], "2044": [438, 221, 1902, 2928, 2485, 2282, 920, 224, 3097, 706, 928, 2895, 2424, 2737, 1530], "430": [1726, 378, 712, 861, 107, 3116, 920, 224, 810, 2109, 344, 3105, 928, 1228, 584, 3104, 2495, 1548, 2728, 1656, 2305, 3114, 3054, 2362, 1975, 2893, 69, 2130, 1223, 2283, 1555, 1856, 2078, 733, 1062, 1211, 1689, 588, 768, 689, 390, 407, 1109, 2153, 467, 577, 2136, 486, 1876, 1425, 1912, 2420, 2429, 176, 2088, 1123, 2970, 1195, 1864, 2061, 2241, 916, 704, 3004, 2107, 1844, 1831, 1420, 2335, 1260, 2178, 440, 1682, 2336, 1147, 1391, 1013, 853, 3014, 1570, 1481, 1075, 257, 1991, 1431, 802, 1113, 1278, 2409, 1525, 1710, 2534, 2034, 1717, 139, 855, 728, 3160, 2079, 1052, 502, 2889, 2936, 2617, 608, 436, 2442, 1213, 1993, 718, 2014, 1895, 346, 2664, 2459, 2341, 2894, 2661, 3065, 929, 2274, 569, 162, 3044, 2962, 2168, 2802, 276, 1839, 1796, 2725, 3025, 2502, 2384, 2724, 1762, 133, 2606, 1668, 2631], "1268": [2846, 1713, 2334, 2686, 861, 184, 48, 920, 224, 810, 394, 1548, 2534, 635, 2384], "8653": [2347, 509, 1186, 1117, 861, 621, 48, 920, 1907, 2185, 1424, 1656, 1195, 569, 608, 2362, 276, 3057], "9012": [1234, 3152, 2121, 2323, 1544, 3164, 920, 1907, 1612, 2327, 588, 257, 635, 569, 608, 1796, 276, 2645, 1213], "652": [515, 294, 964, 2928, 1659, 48, 920, 224, 3097, 706, 1108, 1895, 928, 2645, 1530, 257, 2912, 3054, 569, 2656, 318, 1525, 2184, 1607, 803, 1796, 502, 2178, 588, 635, 2384, 436, 768, 1213], "125": [194, 2864, 50, 2928, 48, 920, 224, 810, 2101, 1387, 1856, 2384, 2936], "1934": [2248, 476, 2928, 1126, 3023, 920, 224, 810, 1369, 2350, 2677, 257, 569, 2478, 318, 3044, 2184, 1745, 2534, 2709, 2660, 139, 1796, 276, 763, 588, 1662, 2936, 395, 2384, 3092, 768, 1213, 2734], "277": [2248, 1222, 1540, 861, 2611, 48, 920, 224, 810, 2204, 2549, 2524, 2734, 2936, 83, 569, 2384, 859, 608, 1570, 276, 2645, 2424, 2501, 2737, 1548, 751, 2661], "375": [1726, 476, 79, 653, 1304, 48, 920, 224, 3097, 706, 588, 1213, 1796, 1147, 2645], "5336": [1199, 2864, 180, 2928, 473, 653, 920, 224, 810, 464, 1013, 569, 2764, 608, 276, 2645, 3057], "2781": [839, 2060, 371, 2323, 1768, 861, 920, 224, 810, 3142, 1505, 2534, 2384, 1606, 996], "2208": [1449, 1222, 964, 557, 653, 1499, 861, 920, 224, 3097, 706, 2661, 257, 139, 569, 1912, 2362, 3130, 2409, 1147, 1525, 2130, 440], "6770": [839, 2864, 1828, 653, 1304, 1085, 920, 224, 3097, 706, 440, 1195, 569, 276, 2362], "9311": [308, 3152, 2927, 861, 2484, 653, 920, 224, 3097, 400, 2384], "7590": [1234, 3152, 964, 653, 210, 2063, 920, 224, 3097, 706, 1656, 2912, 635, 276, 768, 1525], "4757": [2665, 1535, 2932, 653, 2243, 2063, 920, 224, 810, 2109, 2115, 1195, 1764, 635, 569, 2362, 276, 1245, 751], "6139": [454, 433, 49, 1503, 861, 1114, 1649, 920, 224, 3097, 1637, 1028, 1147, 2734, 2362], "521": [454, 1417, 2052, 653, 2243, 861, 920, 224, 3097, 400, 1656, 717, 2912, 139, 2241, 2735, 276, 2645, 1525], "7437": [515, 1222, 17, 807, 861, 1974, 2323, 920, 1144, 1761, 760, 2153, 2168, 318, 2645, 2424, 2737, 2184], "250": [1121, 911, 1540, 653, 1304, 3164, 920, 224, 3097, 706, 635, 2645, 1525, 2912, 751], "3957": [2858, 1417, 193, 1806, 861, 2484, 861, 920, 1144, 1761, 760, 635, 139, 1362, 2424, 2737, 2409, 390], "5987": [1234, 3152, 640, 2928, 473, 48, 920, 224, 3097, 400, 2936, 139, 2168, 2384, 276, 2645, 3044, 768, 2153, 2728], "2856": [89, 1618, 1081, 1092, 861, 3063, 2063, 920, 224, 810, 464, 2936, 139, 859, 3161, 1570, 1113, 2661], "8113": [308, 3152, 2903, 861, 213, 3164, 920, 224, 3097, 706, 2912, 855, 704, 1431, 1525, 3057], "7315": [1133, 2446, 1937, 861, 2484, 861, 920, 224, 3097, 2767, 2384, 768, 2936], "5187": [670, 378, 2334, 2240, 846, 3103, 2330, 2814, 119, 451, 124, 569], "4082": [1550, 1417, 899, 1463, 653, 126, 846, 920, 224, 3097, 2510, 1108, 3054, 803, 802, 436, 2424, 2737, 2409, 502, 2728, 2661], "1212": [1726, 1535, 2223, 362, 2928, 131, 1085, 920, 224, 3097, 1889, 928, 2384, 859, 1570, 276, 2424, 2737], "152": [1951, 421, 1219, 653, 359, 846, 920, 224, 3097, 706, 928, 1431, 2456, 257, 2130], "6860": [515, 3152, 964, 912, 2928, 1659, 48, 920, 224, 3097, 706, 1656, 966, 569, 276, 2335, 946], "2999": [2605, 1535, 861, 2484, 846, 920, 224, 810, 75, 2549, 2524, 635, 83, 569, 2501], "533": [670, 221, 1294, 861, 2484, 3023, 920, 224, 3097, 1997, 588, 1563, 929, 139, 883, 1796, 1213, 69, 2233], "165": [308, 3152, 1492, 653, 210, 653, 920, 1144, 1761, 760, 588, 1656, 1195, 1391, 257, 2362, 1796, 821, 1213, 1147, 440], "7197": [2248, 221, 1538, 653, 2668, 2282, 920, 224, 810, 464, 139, 855, 704, 802, 2424, 1431, 2737], "2343": [1640, 619, 2355, 2928, 2198, 3164, 920, 224, 810, 1450, 1075, 2936, 928, 3054, 569, 2319, 139, 2061, 2384, 2902, 608, 318, 2645, 802, 2424, 2737, 436, 1509, 2184], "2629": [1554, 165, 2801, 767, 653, 1932, 2282, 920, 224, 3097, 1889, 2732, 2534, 1195, 257, 2912, 2936, 2130, 635, 139, 2384, 2424, 2737, 1854, 1525, 751, 440], "8614": [2665, 1535, 3013, 861, 1751, 3116, 2814, 119, 1644, 1850, 2549, 2524, 1387, 83, 3054, 2902, 2724, 276, 2645, 2424, 2501, 2737, 436, 1505], "6868": [1234, 3152, 580, 653, 1304, 1649, 920, 224, 3097, 706, 1656, 1764, 929, 1013, 569, 2456, 2764, 859, 828, 704, 1570, 276, 1245, 69], "997": [1951, 3152, 364, 2928, 331, 48, 920, 224, 3097, 400, 1656, 929, 1387, 635, 1147, 318, 802, 2645, 69, 2184], "2389": [2248, 1618, 2984, 653, 1944, 2063, 920, 224, 810, 2964, 440, 569, 1839, 1147], "2154": [1051, 619, 2820, 861, 2484, 1047, 920, 224, 810, 754, 635, 753, 2362, 383, 276, 2645], "303": [2347, 1417, 3155, 2323, 2298, 1047, 920, 224, 3097, 1025, 1764, 2709, 569, 1245, 802, 2424, 2737], "8374": [1133, 1222, 3077, 861, 2484, 2323, 920, 224, 3097, 400, 1606, 635, 1013, 2764, 2645, 2424, 2737], "242": [3048, 1535, 1636, 846, 759, 2282, 920, 224, 3097, 706, 2990, 2936, 2962, 1231, 2384, 318, 1608, 3044, 1113, 2184], "1105": [438, 2465, 653, 1225, 3084, 920, 224, 3097, 400, 2534, 1108, 2960, 928, 3054, 2384, 803, 436, 502, 3019, 2130], "9317": [2069, 2864, 905, 295, 653, 2668, 1085, 920, 224, 3097, 400, 2549, 2524, 2734, 588, 3057, 257, 635, 83, 1796, 2501, 2645, 1213, 350, 1525, 751], "4525": [2846, 3152, 1902, 2928, 1616, 3164, 920, 224, 810, 464, 2549, 2524, 1108, 1387, 83, 3054, 569, 803, 608, 2501, 802, 2424, 436, 2737, 502], "2036": [1234, 3152, 1867, 2928, 1659, 846, 920, 224, 3097, 706, 588, 2524, 2549, 257, 83, 2384, 1796, 2501, 1213], "8051": [3040, 2770, 1385, 653, 1403, 1649, 920, 224, 3097, 706, 1391, 1606, 2936, 855, 2384, 584, 1228, 2362, 704, 2645, 1431, 2424, 2737, 1147, 1525, 440], "6693": [515, 3152, 2486, 653, 2313, 3164, 920, 224, 3097, 400, 2912, 1895, 1342, 3054, 2456, 569, 2656, 3014, 2638, 436, 1525, 2178], "32": [2347, 165, 1636, 653, 210, 861, 920, 224, 3097, 706, 2549, 2524, 1342, 83, 2638, 2501, 2645, 2424, 2737, 2409, 2661], "1944": [2069, 1618, 1036, 2928, 473, 1649, 920, 224, 3097, 1997, 2549, 2524, 1764, 2962, 83, 569, 1608, 1245, 821, 2645, 2737, 2424, 2501], "7017": [2846, 619, 2927, 2928, 2485, 573, 920, 224, 3097, 1291, 69, 802, 929], "3586": [2347, 221, 1045, 1344, 653, 2668, 861, 920, 224, 3097, 706, 704, 69, 2384, 1525, 929], "258": [2598, 378, 5, 847, 2190, 507, 958, 820, 3084, 34, 846, 200, 2290, 343, 920, 1144, 1761, 760, 2661, 1391, 1013, 569, 2764, 276, 2645, 2409, 1147, 440], "8578": [1449, 307, 3077, 135, 3084, 731, 3084, 920, 224, 3097, 400, 588, 257, 928, 1796, 276, 2645, 1213], "4405": [2858, 166, 640, 861, 2484, 48, 920, 224, 3097, 400, 2732, 1013, 569, 2764, 2424, 2737, 1854, 1481], "648": [2665, 2465, 642, 507, 653, 779, 653, 1346, 920, 1907, 1612, 2327, 1656, 1108, 139, 3054, 803, 436, 502], "24": [1726, 2770, 640, 2928, 1659, 2928, 920, 224, 3097, 400, 588, 2524, 2549, 257, 83, 569, 1796, 2501, 1213, 763, 751], "3987": [3068, 166, 3122, 2296, 2928, 473, 2063, 920, 224, 810, 1369, 635, 276, 2645, 2424, 2737, 1147], "478": [1449, 2465, 930, 861, 745, 48, 920, 224, 810, 553, 1105, 2936, 753, 2384, 2545, 3044, 2661], "330": [515, 3152, 640, 861, 1974, 846, 920, 224, 3097, 706, 1656, 635, 276, 1113, 3143, 2265, 2285], "6750": [2858, 433, 1492, 1775, 861, 231, 3084, 920, 224, 3097, 329, 1656, 588, 1195, 257, 139, 859, 2362, 828, 1570, 1796, 3004, 82, 1213, 1260], "3327": [2665, 294, 1081, 1232, 861, 213, 2063, 920, 224, 3097, 706, 635, 286, 751], "2055": [1948, 3152, 2121, 2928, 2145, 1649, 920, 224, 3097, 400, 635, 276], "351": [2598, 2060, 3128, 2323, 1963, 653, 920, 224, 3097, 400, 139, 569, 2645, 802, 1147, 751], "6463": [3068, 433, 640, 312, 861, 152, 1649, 920, 224, 3097, 706, 2549, 2524, 1387, 83, 928, 2724, 276, 2501, 1530], "1052": [454, 378, 2173, 653, 1225, 861, 920, 224, 810, 1161, 1607, 1764, 2936, 928, 569, 2384, 1245, 1530, 2734], "3608": [2665, 2446, 3077, 1807, 653, 2668, 1649, 920, 224, 3097, 706, 2661, 3019, 2960, 2936], "7563": [3068, 221, 1540, 653, 1499, 2003, 920, 224, 810, 394, 2424, 569, 768, 276, 2737], "8020": [670, 619, 499, 3084, 652, 846, 920, 1144, 1761, 760, 1548, 1570, 276, 859, 828], "4739": [3048, 221, 29, 846, 2127, 846, 920, 224, 3097, 706, 588, 257, 2479, 111, 1762, 1796, 2645, 1213, 3057], "8357": [1948, 3152, 1636, 846, 759, 2323, 920, 224, 810, 553, 1195, 1391, 2936, 635, 569, 2384, 2362, 1147, 440], "9179": [194, 1535, 2223, 861, 213, 653, 920, 224, 3097, 2767, 440, 1391, 1525, 2914, 1147], "4939": [1550, 2060, 2801, 2380, 2928, 497, 757, 920, 224, 3097, 400, 635, 1013, 751, 2764, 276, 821, 2424, 2737, 3057], "8503": [3048, 1222, 29, 2928, 2198, 48, 920, 224, 3097, 706, 1075, 1108, 2502, 3054, 2061, 569, 803, 436, 2424, 2737, 502, 486], "6675": [670, 3152, 964, 2323, 2047, 846, 920, 224, 3097, 706, 1195, 2936, 569, 2384, 608, 2362, 2914], "2446": [515, 2142, 180, 846, 815, 2919, 920, 224, 3097, 400], "6466": [2554, 3152, 2223, 1537, 2928, 473, 3164, 920, 224, 810, 2204, 1195, 276, 2645, 2424, 2737], "7550": [1449, 2918, 51, 1316, 1816, 653, 181, 2010, 861, 1981, 920, 1907, 1612, 2327, 1656, 635, 2645, 1387], "6782": [1121, 1943, 2797, 653, 1569, 1649, 920, 224, 810, 553, 2549, 2524, 1764, 83, 569, 318, 1245, 768, 2501, 2645, 2409, 2184, 2661], "1894": [515, 1943, 628, 653, 2668, 1777, 2814, 119, 451, 1119, 326, 2936, 139, 276, 2409, 2676, 1525, 2661], "6601": [1948, 1565, 2197, 2277, 846, 673, 1047, 920, 224, 3097, 2510, 2936, 635, 2384, 2424, 2737, 1147], "7819": [670, 1417, 2141, 653, 861, 920, 224, 2798, 606, 588, 257, 2936, 635, 139, 2384, 1796, 802, 2424, 2737, 1213], "8247": [308, 964, 2968, 653, 1304, 2063, 920, 224, 3097, 706, 1559, 3054, 2168, 2902, 276, 436, 2153, 2677, 3057], "630": [3068, 1079, 964, 861, 213, 2282, 920, 224, 810, 553, 1968, 929, 3061, 139, 569, 1362, 2362, 383, 704, 318, 802, 2424, 276, 2737, 2677, 69, 763, 2184, 390], "5473": [515, 221, 3042, 2323, 725, 48, 920, 224, 3097, 329, 1656, 2612, 2479, 1013, 2764, 1762, 2645], "2813": [515, 3152, 1371, 861, 2611, 691, 2814, 119, 451, 124, 1656, 3050, 2936, 2384, 797, 2362, 1147, 276, 3044, 3143, 2265, 1548, 946, 440], "112": [438, 509, 2907, 846, 673, 846, 920, 224, 2798, 2147, 588, 257, 859, 1796, 1570, 1213, 2130], "4005": [2554, 1696, 936, 1835, 844, 861, 231, 2063, 920, 1144, 1761, 760, 395, 569], "5097": [3048, 911, 413, 2928, 2145, 653, 920, 224, 3097, 706, 2549, 2524, 1505, 635, 83, 2501, 2645, 2914, 1548, 751], "6610": [3048, 2446, 3047, 3027, 403, 861, 1114, 1586, 3164, 455, 920, 1907, 1612, 2327, 139, 569, 2168, 1912, 2362, 2153, 1525], "6236": [1951, 421, 1707, 902, 861, 1564, 846, 920, 224, 3097, 2510, 569, 2034], "4848": [2605, 3152, 3047, 1279, 2928, 1679, 935, 1649, 2727, 2814, 2922, 2293, 354, 2936, 635, 139, 2384, 2645, 2424, 802, 2737, 3057], "9278": [2248, 2005, 428, 3084, 731, 2928, 920, 224, 3097, 400, 929, 569, 1147, 768, 577, 69, 440], "4365": [1199, 166, 60, 846, 3103, 2282, 920, 224, 3097, 706, 2549, 2524, 83, 276, 2645, 2501, 2424, 2737], "6112": [1521, 1222, 2281, 653, 1403, 3023, 920, 224, 3097, 400, 588, 1195, 257, 2960, 1387, 635, 139, 569, 3019, 608, 2362, 1796, 276, 2645, 2424, 2737, 1213, 1147], "9356": [2665, 2770, 2494, 2065, 888, 507, 976, 1034, 2323, 1501, 988, 2348, 2323, 132, 920, 1144, 1761, 760, 588, 257, 717, 2912, 2061, 2735, 1796, 2424, 2737, 2409, 1213, 1525], "5346": [1521, 1079, 1540, 846, 1372, 653, 920, 224, 810, 394, 1864, 257, 2130], "9396": [2665, 2446, 1332, 2928, 1659, 653, 920, 224, 810, 272, 704, 69, 569, 929], "7100": [1133, 433, 964, 2714, 653, 2668, 2282, 920, 224, 3097, 706, 139, 2384, 2424, 802, 2737], "8201": [2554, 2060, 1358, 2562, 1047, 644, 653, 920, 224, 3097, 2510, 2549, 2524, 929, 139, 83, 704, 2501, 2424, 768, 2737, 69], "3198": [1951, 421, 2346, 653, 2668, 48, 920, 224, 3097, 706, 635, 569, 608, 2362, 2424, 2737], "1882": [308, 3152, 640, 861, 2484, 653, 920, 224, 3097, 706, 1656, 2534, 2936, 139, 569, 2384, 802, 1431, 768], "213": [2605, 619, 580, 1445, 861, 152, 1777, 920, 224, 3097, 1997, 588, 2549, 2524, 257, 2479, 2936, 2336, 2299, 83, 1762, 1796, 276, 2645, 2424, 2501, 2737, 1213, 1028, 1147, 2661], "7997": [1554, 3152, 2801, 1423, 861, 2484, 3023, 920, 224, 3097, 706, 1656, 2732, 1607, 2534, 966, 2936, 527, 1645, 928, 139, 1178, 569, 822, 2180, 1530, 1479, 1113, 1278, 2728, 2661], "1336": [1051, 226, 542, 2928, 473, 2003, 920, 224, 3097, 1889, 928, 1530, 1028, 2661, 1075, 257, 2912, 569, 2362, 1525, 751, 1607, 83, 2061, 1796, 276, 588, 2549, 2524, 2936, 635, 2501, 2545, 1213], "5783": [1951, 2770, 1540, 653, 1304, 2282, 920, 224, 3097, 706, 1108, 2912, 3054, 803, 436, 2424, 2645, 2737, 2409, 502, 1525], "7378": [1449, 2005, 2778, 2094, 861, 1701, 48, 920, 224, 3097, 400, 928, 751], "7166": [308, 3152, 58, 2928, 473, 1085, 920, 224, 810, 394, 1195, 257, 2912, 1013, 2764, 318, 768, 1525, 2184], "1490": [839, 2864, 712, 846, 2787, 510, 2814, 119, 1644, 1370, 1013, 1362, 2737, 1876, 1656, 1087, 2661, 257, 7, 569, 1912, 2362, 390, 1113, 1431, 2424, 2409, 1525, 2130, 2709, 139, 704, 1796, 276, 440, 588, 2936, 635, 2617, 2384, 1762, 1213, 1147, 2819], "6451": [2347, 2918, 333, 846, 1881, 758, 2814, 119, 1644, 2208, 2962, 440, 1391, 1608, 1147], "8079": [1234, 3152, 499, 861, 2433, 3164, 920, 224, 3097, 400, 588, 2549, 2524, 257, 83, 569, 1796, 2501, 2645, 2424, 2737, 1213], "6781": [2846, 2060, 2281, 1047, 3072, 757, 920, 224, 810, 2204, 1607, 2912, 2960, 928, 569, 1362, 318, 276, 1530, 3057, 3019, 1525, 2184, 751, 390], "5209": [454, 911, 1540, 861, 152, 48, 920, 224, 810, 394, 1607, 1993, 1587, 928, 569, 1530], "794": [1133, 2864, 2687, 989, 861, 1564, 2063, 920, 224, 3097, 329, 139, 802, 3044, 1028, 2362], "4329": [1199, 1191, 628, 653, 1304, 3164, 920, 224, 3097, 706, 2534, 2384, 276, 1548, 1147, 440], "4983": [1521, 1943, 2979, 2152, 861, 2484, 1649, 920, 224, 810, 553, 2479, 1762, 276, 821, 768, 3044, 2737, 2645, 2424, 1147, 751, 440], "1148": [2846, 2918, 9, 861, 52, 653, 920, 1907, 2185, 1043, 929, 569, 1147, 2424, 2737, 69, 440], "808": [1951, 1565, 3077, 2308, 653, 2668, 2282, 920, 224, 3097, 706, 3054, 2902, 2362, 802, 2424, 436, 2737, 1028, 2734], "5904": [2605, 1535, 2346, 653, 1093, 3045, 2814, 119, 451, 124, 1607, 588, 257, 2660, 1895, 1013, 928, 3054, 569, 2764, 2168, 2362, 1530, 2656, 1796, 2384, 436, 2153, 1213, 1028, 2178], "4014": [1726, 294, 964, 1232, 846, 3103, 1085, 920, 224, 3097, 1889, 1295, 139, 3057, 257, 2130], "5002": [2347, 1943, 3102, 861, 2484, 3084, 920, 224, 3097, 1025, 276, 2734], "5220": [1521, 3152, 1540, 2928, 131, 2063, 920, 224, 3097, 1889, 2912, 318, 2645, 2424, 276, 2737, 1147, 1525, 2184, 751], "3969": [1550, 2770, 1540, 2344, 861, 2845, 757, 920, 224, 3097, 1889, 1108, 2645, 2723, 2737, 1028, 486, 3054, 569, 2362, 802, 2424, 1387, 83, 803, 704, 276, 502, 2549, 2524, 2502, 635, 2724, 2501, 436], "4473": [515, 221, 2223, 861, 152, 2063, 920, 224, 810, 2204, 2549, 2524, 1387, 83, 569, 2724, 2501, 1028, 1147], "7817": [1121, 2465, 1378, 846, 673, 861, 920, 224, 3097, 2510, 635, 2645, 2424, 2737, 1811, 2677], "3852": [194, 1535, 640, 861, 2484, 2323, 920, 224, 3097, 2510, 588, 257, 2912, 139, 569, 2168, 1912, 1796, 2153, 1213, 1525], "1141": [1449, 307, 2481, 1047, 1748, 2323, 920, 1907, 1612, 2327, 139, 569, 1525, 1912], "1986": [670, 221, 2346, 2928, 2012, 1649, 920, 224, 393, 2391, 588, 1195, 1391, 257, 2912, 569, 2362, 1796, 2645, 802, 2424, 2737, 1213, 1147, 1525, 440], "2490": [308, 3152, 2085, 807, 2323, 1427, 2323, 920, 1144, 1761, 760, 2549, 2524, 1108, 83, 3054, 803, 276, 2501, 2424, 436, 2737, 502], "4333": [1951, 421, 629, 3084, 2928, 920, 224, 810, 970, 1656, 2936, 1013, 139, 569, 2384, 2764, 2409, 2661], "158": [1948, 3152, 1883, 2928, 1661, 2323, 920, 224, 810, 553, 2912, 928, 569, 2384, 608, 2645, 2424, 3044, 2737, 1525], "3137": [2554, 1222, 653, 2313, 653, 920, 224, 3097, 1997, 635, 3054, 2384, 2902, 276, 436, 2424, 2737], "8784": [2554, 378, 2371, 653, 2103, 48, 920, 224, 3097, 329, 1108, 1387, 635, 1013, 3054, 2764, 803, 318, 436, 502, 2184], "5153": [1550, 1618, 642, 1354, 861, 142, 48, 3110, 920, 1907, 1612, 2327, 1342, 139, 1362, 2638, 802, 2424, 2737, 1028, 2734, 390], "7226": [1948, 421, 1852, 450, 653, 210, 846, 920, 224, 3097, 2363, 2549, 2524, 588, 257, 83, 1295, 1796, 2501, 1213, 1028, 1147, 3057], "2809": [194, 1079, 1636, 653, 210, 1047, 920, 224, 3097, 2510, 1147, 2645, 608], "7319": [2347, 2446, 542, 861, 152, 1649, 920, 224, 393, 2549, 2524, 1968, 1387, 3061, 83, 2724, 2501, 2424, 2737], "4059": [2347, 509, 1602, 2928, 473, 1649, 920, 224, 3097, 706, 1656, 2479, 139, 855, 1762, 704, 276, 2645, 2424, 1431, 2737], "1748": [2665, 166, 262, 861, 2484, 2063, 920, 224, 3097, 2510, 2549, 2524, 83, 859, 828, 1570, 2501, 1028, 1147], "2893": [1550, 1618, 2494, 2065, 888, 507, 976, 1034, 653, 2322, 1179, 770, 356, 920, 1144, 1761, 760, 1108, 257, 139, 3054, 803, 436, 2424, 802, 2737, 502], "4584": [1234, 3152, 357, 653, 1569, 861, 920, 224, 3097, 2510, 598, 1295, 2475, 2359], "1455": [515, 3152, 3122, 861, 152, 1777, 920, 224, 3097, 1889, 2549, 2524, 1108, 257, 1387, 635, 928, 3054, 83, 803, 2362, 276, 2501, 2424, 436, 2737, 1548, 502, 1028], "64": [3068, 221, 70, 2928, 793, 2282, 920, 224, 3097, 706, 1607, 1013, 928, 569, 2764, 276, 821, 1530, 751], "3333": [2598, 307, 2258, 653, 2668, 48, 920, 224, 810, 1102, 588, 257, 635, 569, 608, 1796, 3044, 1213], "691": [1554, 378, 949, 1894, 1047, 3127, 2063, 920, 224, 810, 2204, 1195, 2912, 2936, 855, 2384, 2362, 704, 3051, 276, 2424, 1431, 2737, 3044, 1525], "1133": [438, 433, 1412, 861, 213, 2919, 920, 224, 810, 2201, 1656, 1195, 139, 569, 1912, 2362, 2424, 768, 2737, 1147, 1525, 2734, 2661], "3754": [308, 2281, 1117, 653, 2243, 1649, 920, 224, 810, 2204, 2660, 928, 139, 3051, 276, 802, 3044], "4376": [2846, 2142, 1081, 633, 2928, 1659, 1085, 920, 224, 810, 602, 1656, 929, 2912, 569, 2362, 704, 1839, 2645, 3044, 69, 1525], "5047": [308, 1373, 2323, 725, 861, 920, 224, 810, 2204, 588, 1764, 257, 1895, 3054, 569, 2168, 2656, 1796, 1245, 3044, 436, 2153, 2409, 1213, 1525, 2178], "7033": [1951, 165, 2963, 1873, 861, 2763, 48, 920, 1907, 1612, 795, 2677, 569], "4789": [2554, 1222, 591, 1194, 861, 2861, 846, 920, 1907, 1612, 2327, 1607, 1993, 928, 569, 2384, 2645, 3044, 1530, 3057], "4666": [1550, 2464, 3042, 861, 2484, 861, 920, 224, 3097, 1637, 751], "3364": [2598, 2770, 1460, 2418, 861, 2484, 1649, 920, 224, 3097, 400, 1195, 1108, 2612, 1387, 635, 3054, 803, 2362, 350, 2724, 318, 436, 2424, 2737, 502, 1028, 1147, 2184], "971": [1640, 2918, 591, 989, 2928, 1679, 2323, 2167, 920, 1144, 1761, 760, 928, 257, 2130], "6855": [3040, 2465, 2223, 653, 2243, 2063, 920, 224, 3097, 1889, 1607, 928, 569, 2362, 1530, 276, 2645, 2424, 2737, 1028, 751], "2874": [1951, 2770, 794, 653, 2243, 1649, 920, 224, 3097, 706, 1764, 2479, 533, 569, 608, 1762, 1245, 802, 3044, 2645], "9443": [839, 2864, 2223, 2308, 653, 600, 1649, 920, 224, 2867, 1108, 1895, 3061, 928, 822, 2645, 1530, 2737, 1028, 257, 3054, 569, 2362, 2656, 802, 2424, 751, 1607, 1195, 533, 83, 139, 803, 1796, 276, 502, 2178, 2549, 1968, 2524, 588, 2936, 2384, 608, 2501, 436, 768, 1213], "5717": [839, 1713, 1540, 861, 213, 846, 920, 224, 3097, 400, 2549, 2524, 1764, 2912, 83, 569, 2501, 1245, 3044, 1525], "6991": [1133, 1618, 472, 653, 1304, 691, 2814, 119, 1644, 2208, 1656, 1195, 1108, 2612, 2479, 2962, 3054, 2902, 803, 2362, 608, 1762, 1608, 276, 2424, 821, 2737, 436, 502, 1147, 440], "7421": [2598, 1618, 536, 861, 1974, 861, 920, 224, 810, 1919, 1656, 588, 257, 929, 1387, 139, 569, 608, 1796, 2645, 2424, 2737, 1213, 69, 1525, 2734], "3731": [2846, 307, 628, 861, 213, 1085, 920, 224, 3097, 2767, 2023, 276, 2424, 2737, 1548, 751], "448": [1554, 2464, 51, 2965, 861, 975, 653, 2322, 920, 1907, 1612, 2327, 139, 569, 2061, 802], "1450": [2069, 911, 1044, 653, 2033, 1649, 920, 224, 810, 553, 2549, 2524, 2709, 83, 2501, 2645, 276, 1505, 440], "3291": [2352, 1618, 29, 1286, 2323, 1963, 48, 920, 224, 810, 464, 635, 276, 2645, 2424, 1431, 2737, 1505], "2004": [1948, 3152, 2486, 2202, 2928, 80, 48, 920, 224, 3097, 329, 1607, 928, 569, 2384, 276, 1530, 1548, 1509], "5194": [1449, 2770, 591, 2317, 989, 653, 1862, 2063, 1593, 920, 1907, 1612, 2327, 276, 1362, 2645, 390], "811": [438, 2918, 630, 861, 1190, 1649, 920, 224, 3097, 706, 928, 2645, 1530, 257, 3054, 569, 2362, 318, 2184, 1607, 1195, 1342, 1796, 276, 502, 588, 2936, 635, 2384, 2638, 436, 1213, 3057], "8182": [2554, 2060, 1579, 2928, 2485, 48, 920, 224, 810, 2101, 2534, 635, 569, 2384, 584, 1228, 276, 3044], "3880": [1121, 2918, 1081, 222, 861, 152, 1649, 920, 224, 3097, 706, 821, 2645, 3044], "6091": [2605, 1222, 1636, 861, 152, 2063, 920, 224, 3097, 1997, 2549, 2524, 2479, 1387, 83, 2724, 1762, 2501], "8411": [2248, 2918, 2223, 653, 1499, 1085, 920, 224, 3097, 706, 1656, 2534, 2015, 139, 569, 2384, 608, 276, 802, 1839, 763], "4950": [670, 509, 861, 1974, 861, 920, 224, 2798, 2147, 855, 569, 704, 276, 1431, 3044, 2737, 2424, 2677], "4018": [89, 1222, 499, 1047, 1458, 846, 920, 224, 3097, 706, 139, 569, 1525, 1912], "338": [308, 3152, 128, 2994, 861, 152, 48, 920, 224, 810, 2204, 2936, 569, 802, 1028, 1147, 2734, 2661], "6994": [515, 221, 1828, 25, 2928, 1126, 1085, 920, 224, 810, 602, 1108, 3054, 569, 803, 276, 2645, 2424, 436, 2737, 502, 751], "3079": [1199, 2060, 1053, 2928, 2198, 2063, 920, 224, 3097, 400, 1764, 2912, 2479, 855, 569, 1762, 704, 1245, 1431, 1525, 2734], "3887": [1521, 3152, 357, 861, 231, 3164, 920, 1907, 1612, 2327, 1607, 588, 1195, 257, 2153, 928, 3054, 569, 139, 2168, 2362, 2902, 1147, 1796, 802, 436, 1530, 1213, 69, 1876], "3188": [2248, 1713, 964, 1232, 653, 2243, 48, 920, 224, 3097, 706, 1074, 1801, 1764, 2912, 806, 569, 430, 2760, 1245, 2424, 821, 2737, 1295, 2677, 1525], "4050": [515, 3152, 1513, 2928, 1659, 48, 920, 224, 810, 3142, 440, 2384, 2936], "2365": [3068, 509, 964, 653, 2668, 2928, 920, 224, 3097, 706, 929, 635, 3054, 569, 2902, 608, 436, 2645, 69], "4210": [2605, 476, 180, 2928, 1659, 2063, 920, 224, 810, 876, 1387, 139, 3054, 569, 2902, 802, 2424, 436, 763, 440], "1398": [2069, 2446, 51, 3109, 861, 960, 115, 653, 2972, 920, 1144, 1761, 760, 1656, 2384, 2362, 704, 2501, 3044, 768], "1090": [308, 3152, 1036, 861, 152, 1085, 920, 224, 3097, 400, 1607, 2549, 1968, 2524, 2737, 3061, 928, 569, 1362, 83, 855, 704, 2501, 2424, 1431, 1530, 2677, 1505, 390], "1672": [1121, 2446, 3033, 846, 673, 1085, 920, 224, 3097, 2510, 1607, 2936, 928, 569, 2384, 1530, 1147, 2661], "4191": [515, 294, 1540, 861, 621, 3023, 2814, 119, 451, 1119, 569, 276], "952": [1554, 2770, 653, 856, 846, 920, 224, 3097, 329, 1801, 257, 2343, 569, 2495, 2728], "5241": [1234, 3152, 964, 1374, 1047, 2076, 846, 920, 224, 3097, 706, 139, 276, 2384, 3057], "6269": [839, 378, 1081, 207, 861, 2484, 3164, 920, 224, 810, 3030, 2549, 2524, 2936, 1387, 2299, 83, 2384, 2501, 2336], "3802": [454, 509, 861, 468, 48, 920, 224, 810, 3142, 1656, 1801, 2709, 806, 2061, 859, 1570, 2645], "8908": [1726, 1713, 2114, 846, 1203, 1649, 920, 224, 810, 1102, 2936, 2384, 768, 1028, 1147, 946, 2734], "2467": [308, 3152, 262, 536, 653, 784, 1085, 920, 224, 3097, 400, 1074, 2549, 2524, 1391, 1342, 83, 569, 430, 2760, 2638, 2501, 821, 1548, 1147, 440], "9485": [1550, 509, 630, 653, 2668, 2282, 920, 224, 3097, 1889, 1391, 635, 276, 2645, 1147, 1505, 440], "5588": [1948, 937, 846, 3103, 2063, 920, 1907, 1612, 2327, 486, 2384], "5337": [2248, 1535, 794, 3084, 2422, 1085, 920, 224, 810, 2204, 1656, 1013, 1699, 2384, 2764, 2362, 2424, 3044, 2737, 1028], "1751": [2598, 509, 2933, 846, 759, 861, 920, 224, 3097, 329, 1656, 929, 2936, 635, 2384, 704, 69], "656": [194, 619, 1350, 2286, 861, 1974, 2928, 920, 224, 3097, 329, 588, 2524, 2549, 257, 635, 83, 1796, 2501, 2424, 2737, 1213, 751], "8612": [1550, 216, 496, 653, 2703, 48, 920, 224, 3097, 706, 1968, 1764, 3061, 139, 569, 1245, 3044, 2424, 2737, 821], "6971": [2248, 1079, 29, 861, 213, 247, 920, 224, 3097, 706, 588, 257, 635, 2384, 584, 1228, 704, 2362, 1796, 2225, 1213, 1147], "9079": [308, 3152, 2927, 2515, 2928, 2012, 2282, 920, 224, 810, 464, 1195, 3032, 569, 2362, 3112, 3044, 2424, 2737, 763, 2238], "1812": [1951, 3152, 2355, 2928, 473, 2063, 920, 224, 3097, 400, 1891, 928, 2168, 617, 2153], "3538": [1051, 1696, 937, 653, 1569, 1649, 920, 224, 3097, 1989, 569, 1525, 2912], "8673": [1234, 3152, 2801, 653, 2243, 2282, 920, 224, 810, 464, 2549, 2524, 2936, 83, 2384, 2501, 2424, 2737, 2409, 751, 2661], "5837": [1554, 378, 653, 1225, 861, 920, 224, 3097, 1025, 2549, 2524, 83, 2362, 2501, 2645], "3294": [2347, 166, 642, 3071, 514, 2928, 3164, 2318, 920, 1907, 2302, 896, 1968, 1108, 1764, 3061, 569, 3054, 803, 276, 821, 768, 3044, 1245, 318, 502, 436, 2184], "7170": [3048, 619, 1936, 653, 2243, 2003, 2814, 119, 1644, 2414, 2534, 276, 2384, 3044], "6446": [2248, 2918, 2292, 1060, 653, 359, 1047, 920, 224, 3097, 329, 588, 257, 1387, 2168, 859, 1570, 1796, 802, 1213], "8749": [2347, 911, 2099, 861, 2670, 48, 920, 224, 3097, 706, 2549, 2524, 1195, 1108, 635, 83, 3054, 139, 803, 2362, 2501, 436, 2424, 2737, 2409, 502, 2661], "5519": [515, 3152, 333, 861, 2611, 2330, 2814, 119, 1644, 2753, 2549, 2524, 83, 2501, 276, 2424, 2737, 1548, 751], "7173": [2248, 1535, 964, 653, 2243, 1085, 920, 224, 3097, 706, 2549, 2524, 1387, 83, 2724, 2501, 2645, 2424, 2737, 2734], "4764": [1951, 165, 2166, 2673, 861, 1974, 2928, 920, 1144, 1761, 760, 635, 486, 2502], "3297": [515, 1222, 1152, 2928, 473, 3023, 920, 224, 3097, 1997, 2660, 1645, 928, 855, 704, 318, 276, 1431, 1627, 3057, 946, 2184, 1505], "1095": [1550, 307, 472, 861, 1594, 2919, 2814, 119, 1644, 2208, 201, 2990, 1013, 928, 1231, 2153, 2737, 1505, 1656, 1075, 257, 569, 2764, 1245, 2424, 2480, 1113, 2168, 2061, 1796, 276, 588, 1764, 2773, 1213], "4833": [2846, 2060, 1523, 653, 2243, 846, 920, 224, 810, 2101, 1656, 1195, 257, 2130, 2362], "1060": [2347, 1191, 2963, 148, 2928, 2145, 3164, 920, 224, 3097, 1025, 588, 257, 2936, 635, 2384, 1796, 2645, 1213], "473": [1133, 2446, 1540, 2323, 1963, 48, 920, 224, 810, 1102, 2537, 2479, 569, 608, 1762, 2645, 2424, 2737, 2771], "7983": [2248, 378, 2481, 653, 1174, 920, 1907, 1612, 2327, 2549, 2524, 2912, 929, 1387, 83, 2384, 2823, 704, 2501, 3044, 768, 69, 1525], "3983": [2605, 2446, 949, 2769, 861, 213, 2928, 920, 224, 810, 3142, 588, 1108, 257, 2912, 1213, 569, 3054, 803, 1796, 276, 436, 502, 1525], "6062": [2069, 2918, 653, 54, 3084, 920, 224, 810, 8, 588, 257, 139, 2168, 1796, 768, 2153, 1213], "633": [3040, 1713, 3020, 846, 759, 2282, 920, 224, 810, 2101, 1147, 440, 1391, 2384, 2936], "3": [1234, 3152, 2789, 2024, 653, 181, 653, 920, 224, 2798, 606, 2549, 2524, 1387, 83, 2501, 276, 2645, 440], "5420": [670, 2060, 3042, 2928, 2485, 3164, 920, 224, 3097, 400, 588, 1195, 257, 2709, 2502, 1013, 569, 2764, 2362, 1796, 318, 2645, 3044, 2424, 2737, 2638, 1213, 486, 2184], "3679": [839, 433, 2494, 2065, 888, 507, 976, 1034, 653, 2322, 1179, 770, 1047, 1658, 920, 1144, 1761, 760, 635, 276, 2645, 257, 2130], "2886": [2248, 1222, 861, 1861, 2282, 920, 224, 810, 1428, 2737, 1764, 2479, 2936, 139, 569, 2168, 2384, 2362, 1762, 1245, 2424, 2153], "6588": [2605, 1079, 2481, 2046, 861, 2484, 757, 920, 1907, 1612, 2327, 635, 276, 2645, 1505], "9125": [2598, 1079, 29, 2928, 2198, 48, 920, 224, 3097, 1025, 2549, 2524, 83, 2362, 276, 2645, 2501, 1505], "6153": [1948, 3152, 2984, 2323, 1768, 1649, 920, 224, 3097, 400, 257, 929, 569, 608, 704, 69, 2130], "5527": [1234, 3152, 2334, 861, 152, 3164, 920, 224, 3097, 1889, 1447, 1216, 797, 719, 1548, 841], "8293": [670, 1417, 2984, 1047, 555, 3164, 920, 224, 810, 553, 1656, 2534, 2168, 2384, 2645, 2153, 2409], "3735": [1199, 1417, 1902, 1970, 2323, 676, 2282, 920, 224, 3097, 706, 1013, 2737, 1505, 1656, 569, 2764, 2478, 318, 802, 2424, 2409, 2184, 1223, 2709, 139, 2942, 2335, 763, 440, 2384, 608, 3112, 1147], "7906": [515, 3152, 1622, 1000, 792, 2928, 1679, 861, 920, 1907, 1612, 2327, 2502, 2960, 1525, 822, 2728, 3019, 486, 751], "2397": [89, 307, 1828, 653, 811, 3164, 920, 224, 3097, 706, 717, 2912, 2735, 276, 1548, 1525], "2013": [3040, 378, 2121, 3084, 613, 2063, 920, 1907, 1612, 2327, 1108, 139, 3054, 569, 803, 276, 2645, 436, 2424, 2737, 802, 502], "5601": [1121, 2770, 1047, 861, 920, 224, 810, 553, 2990, 1656, 1195, 1387, 3032, 928, 569, 1231, 2362, 2645, 1113, 2238], "4103": [2605, 684, 955, 561, 861, 213, 2282, 920, 224, 810, 1369, 2728, 569, 1113], "6037": [515, 294, 707, 2323, 725, 861, 920, 224, 3097, 329, 1968, 3061, 2153, 2168, 1362, 768, 2424, 2737, 390], "5816": [1121, 307, 653, 2668, 846, 920, 224, 3097, 1025, 1607, 929, 69, 928, 569, 704, 2645, 802, 1530, 1147], "4686": [1554, 294, 2223, 2928, 188, 2003, 2814, 119, 451, 1134, 588, 257, 1606, 2936, 635, 139, 569, 2384, 608, 1796, 276, 2645, 1213, 1147, 751, 440], "2255": [1521, 1535, 1492, 1872, 653, 210, 2928, 920, 1144, 1761, 760, 2549, 2524, 83, 2501, 2645, 802, 2424, 2737], "6961": [89, 1535, 1937, 653, 2668, 48, 920, 224, 3097, 706, 2549, 2524, 2737, 83, 2168, 2362, 2501, 2424, 2153, 1548, 1028], "4531": [1948, 3152, 1540, 653, 2243, 2282, 920, 224, 810, 2204, 2549, 2524, 1764, 83, 569, 2501, 1245, 802, 1548], "7357": [3068, 2770, 838, 846, 3103, 691, 2814, 119, 1644, 1850, 2734, 1387], "1048": [670, 2465, 3077, 1438, 2928, 80, 349, 920, 224, 3097, 1291, 588, 1213, 1796, 257], "3430": [1449, 1222, 964, 2928, 473, 3164, 920, 224, 3097, 1889, 1764, 1013, 569, 2384, 2764, 608, 1245, 2645, 2424, 2737, 2677], "7205": [1234, 3152, 964, 861, 213, 757, 920, 224, 810, 2204, 2990, 1391, 1231, 2737, 3054, 569, 802, 2424, 1113, 3044, 946, 139, 83, 2335, 440, 2549, 2524, 635, 2902, 2501, 436, 1147], "8892": [1640, 3152, 2346, 653, 600, 2063, 920, 224, 810, 1102, 2734, 929, 2960, 1013, 69, 1843, 1387, 3019, 2764, 822, 704, 276, 2728, 3057, 1147, 2679], "5915": [1726, 911, 1238, 653, 210, 861, 920, 224, 3097, 329, 2549, 2524, 486, 2912, 2502, 2015, 83, 704, 1839, 2501, 1525], "690": [454, 1222, 798, 1047, 3164, 920, 224, 810, 3142, 588, 257, 635, 1796, 2645, 1213], "5579": [2248, 2918, 1806, 861, 2484, 2928, 920, 224, 810, 3142, 2661, 569, 2545, 3044, 2936], "8838": [2352, 2060, 937, 861, 44, 1085, 920, 1907, 1612, 2327, 1108, 3054, 569, 803, 608, 2645, 436, 502, 1147], "2386": [1121, 378, 653, 359, 2323, 920, 224, 3097, 2510, 2549, 2524, 83, 2501, 2645, 1147, 751, 440], "7809": [2605, 476, 949, 2674, 653, 2243, 1649, 920, 224, 810, 12, 1391, 2962, 569, 608, 1608, 2645, 1147, 440], "4168": [1640, 3152, 1538, 2928, 473, 1777, 920, 224, 3097, 1997, 2549, 2524, 83, 276, 2645, 2501, 2424, 2737], "3075": [3048, 1713, 1082, 2928, 495, 653, 920, 224, 3097, 2510, 588, 1108, 257, 502, 3054, 803, 1796, 436, 1213], "9398": [308, 838, 861, 152, 2928, 920, 224, 810, 2204, 1108, 928, 3054, 2319, 803, 436, 2645, 502, 1525], "8137": [89, 2770, 357, 2928, 2738, 1649, 920, 1907, 2185, 1043, 1548, 577], "1187": [1199, 1191, 964, 985, 861, 213, 2919, 920, 224, 3097, 1889, 2549, 2524, 1195, 588, 257, 2936, 635, 83, 569, 2384, 608, 2362, 1796, 2501, 802, 2424, 2737, 1213, 1525], "1534": [1951, 421, 1068, 2928, 2878, 1085, 920, 224, 810, 553, 2549, 2524, 1548, 83, 2384, 276, 2645, 2501, 318, 2409, 2184, 2661], "8975": [1550, 421, 2166, 2094, 653, 210, 3164, 920, 1144, 1761, 760, 2990, 751, 1231, 2645, 1113, 3057], "4269": [2554, 294, 1636, 1047, 555, 861, 920, 224, 3097, 706, 1195, 1391, 257, 1387, 2962, 69, 2384, 2362, 2068, 1608, 2645, 1147, 2130, 440], "7161": [1726, 2918, 2927, 653, 1304, 3164, 920, 224, 810, 464, 1391, 2960, 2912, 1147, 821, 3019, 1525, 440], "8478": [2554, 1417, 1152, 861, 152, 2063, 920, 224, 810, 2101, 966, 569, 2420, 1876], "8769": [454, 1417, 712, 861, 3116, 2814, 119, 1644, 1098, 1656, 2534, 1764, 1013, 569, 2384, 2764, 821, 1245, 768, 2645, 3057, 1505], "2735": [1550, 216, 79, 251, 2928, 1126, 3023, 920, 224, 810, 1102, 2549, 2524, 2912, 83, 2501, 276, 768, 1548, 1525], "604": [1554, 619, 955, 861, 2611, 846, 920, 224, 3097, 706, 569, 3044, 608, 276], "6725": [1550, 165, 51, 1142, 2323, 595, 653, 920, 1907, 1612, 2327, 588, 1391, 257, 139, 569, 1147, 1796, 2645, 802, 1213, 69, 440], "1730": [3040, 378, 1636, 846, 3103, 48, 920, 224, 3097, 400, 1195, 569, 608, 2362, 276, 821, 802, 1548, 763], "3206": [2665, 1417, 955, 653, 1499, 757, 920, 224, 3097, 2642, 1895, 3061, 1362, 1548, 3054, 569, 2656, 2362, 318, 1245, 802, 1525, 2184, 2709, 139, 276, 2178, 1968, 1764, 635, 608, 821, 436, 390], "8865": [2352, 684, 1901, 861, 489, 2003, 920, 224, 810, 1102, 2661, 966, 2384, 2936], "5802": [2554, 476, 2371, 653, 856, 1085, 920, 224, 3097, 400, 1656, 1607, 2709, 928, 569, 2384, 2643, 1530, 1505], "8259": [1951, 421, 964, 2848, 1047, 2076, 846, 920, 224, 3097, 706, 2549, 2524, 1108, 2502, 83, 3054, 803, 2501, 2645, 2424, 436, 2737, 502, 1147, 486], "2645": [1948, 421, 1798, 2323, 676, 48, 920, 224, 3097, 1889, 635, 276, 2645, 1147], "2192": [2248, 3152, 3047, 3144, 2323, 2527, 1649, 920, 1907, 1612, 2327, 1108, 257, 2912, 2163, 3054, 569, 803, 2645, 2914, 436, 502, 3057, 946, 1525, 2130], "3390": [454, 433, 964, 2958, 861, 152, 846, 920, 224, 3097, 400, 588, 257, 139, 859, 828, 2362, 1570, 1796, 802, 1213, 1525], "7716": [1554, 1079, 2778, 861, 1974, 1649, 920, 224, 3097, 400, 1656, 2960, 929, 3019, 569, 139, 2362, 1431, 69, 1525], "5182": [194, 2864, 2494, 2065, 888, 507, 976, 1034, 653, 2322, 1179, 770, 861, 850, 969, 2218, 920, 1144, 1761, 760, 1656, 276], "210": [2598, 1079, 1381, 2024, 2323, 2610, 48, 920, 1144, 1761, 760, 1764, 635, 569, 276, 1245, 2424, 2645, 2737], "2463": [308, 3152, 1301, 653, 2668, 757, 2814, 2922, 2293, 2575, 1108, 2645, 2664, 2737, 3054, 569, 802, 2424, 751, 2612, 83, 803, 502, 440, 2549, 2524, 635, 2384, 2902, 2501, 436, 3088, 1147], "8707": [454, 509, 2121, 861, 152, 2063, 920, 1907, 1612, 2327, 1656, 257, 2936, 139, 855, 2384, 704, 1431, 3044, 2442, 2130], "4620": [3068, 1535, 1622, 1194, 2928, 1679, 846, 920, 1907, 1612, 2327, 1656, 2936, 1013, 2384, 2764, 2424, 2737, 2409, 2661], "2207": [1121, 2465, 964, 1553, 2323, 2070, 1649, 920, 224, 3097, 706, 1895, 1362, 2265, 2136, 1481, 2285, 3054, 569, 2656, 1245, 1113, 3044, 841, 2534, 276, 1420, 2178, 440, 1764, 1447, 2384, 719, 436, 821, 3143, 390], "4509": [515, 165, 60, 861, 2260, 2928, 920, 224, 3097, 400, 635, 1228, 584, 2664, 2409, 2661], "1300": [308, 3152, 2223, 2928, 131, 3023, 920, 224, 810, 1259, 569, 1810, 859, 828, 1147, 704, 1570, 1111, 821, 69, 946, 440], "8699": [1951, 2770, 964, 653, 1304, 2282, 920, 224, 3097, 1889, 588, 1656, 257, 2362, 584, 1228, 1796, 1213, 1028, 751], "3854": [2858, 1713, 1902, 861, 2611, 2003, 920, 224, 810, 2201, 588, 1607, 257, 928, 569, 2362, 1796, 1530, 1213, 1028, 1147], "7029": [1051, 1079, 1540, 1537, 2928, 473, 846, 920, 224, 810, 2204, 1606, 2960, 2912, 2545, 3019, 1525, 440], "9394": [839, 433, 2334, 861, 2089, 2003, 920, 224, 3097, 1997, 2737, 257, 2912, 929, 569, 2362, 1245, 2424, 69, 1525, 83, 704, 1796, 588, 2549, 2524, 1764, 2936, 635, 2384, 2501, 1213], "6443": [3048, 2770, 9, 2928, 331, 846, 920, 224, 3097, 400, 276, 2645, 2424, 2737], "8675": [1234, 3152, 1622, 2925, 861, 231, 861, 920, 1907, 1612, 2327, 2549, 2524, 1075, 83, 2061, 2501, 2424, 2737, 2409, 946, 1505, 2661], "6341": [3048, 166, 1636, 653, 1225, 861, 920, 224, 3097, 706, 2661, 569, 2424, 2737], "4119": [2846, 307, 516, 861, 2484, 1649, 920, 1907, 1612, 2327, 2549, 2524, 588, 257, 83, 139, 2168, 2362, 1796, 2501, 2153, 1213], "7460": [2248, 509, 2281, 1232, 653, 2703, 846, 920, 224, 3097, 706, 1074, 1391, 1895, 859, 2760, 1570, 2645, 1876, 257, 2912, 569, 2362, 1113, 69, 1525, 2130, 83, 2947, 440, 2549, 2524, 635, 430, 2501, 1147], "1298": [194, 911, 2096, 653, 784, 48, 920, 224, 810, 8, 2709, 2912, 2168, 853, 859, 608, 1570, 2153, 1147, 1525, 440], "4472": [454, 166, 642, 857, 507, 3084, 1118, 846, 241, 920, 1907, 2302, 896, 2962, 635, 569, 1608, 2645, 1147], "3573": [308, 1053, 861, 2484, 846, 920, 224, 3097, 706, 635, 2728, 569, 822], "3993": [308, 3152, 374, 2203, 3084, 366, 846, 920, 224, 3097, 400, 2356, 1113], "6968": [454, 433, 499, 3118, 861, 800, 48, 920, 224, 3097, 2510, 1607, 2936, 928, 569, 2384, 1530, 2409, 1295, 2661], "1893": [438, 2060, 1602, 861, 213, 757, 920, 224, 3097, 1889, 2534, 569, 2384, 139, 440], "5787": [2347, 166, 146, 293, 2928, 1209, 861, 920, 224, 3097, 1997, 2534, 1108, 1764, 2936, 139, 3054, 569, 2384, 803, 436, 1245, 802, 502, 2734], "727": [1726, 2060, 1902, 653, 2243, 2282, 920, 224, 3097, 706, 588, 257, 2709, 2912, 635, 2153, 2168, 569, 608, 1796, 3044, 2424, 2737, 1213, 1525], "8326": [1121, 226, 999, 2928, 473, 2063, 920, 224, 3097, 400, 1108, 2912, 1895, 1645, 3054, 569, 803, 2656, 436, 2424, 2737, 502, 1525, 2178], "2340": [2347, 3152, 3059, 861, 1955, 1777, 920, 224, 3097, 706, 2936, 635, 2384, 276, 2424, 2737, 1548], "4720": [2665, 1417, 2833, 861, 231, 846, 920, 224, 393, 1457, 569, 440], "8094": [308, 3152, 2346, 653, 2243, 3023, 920, 224, 3097, 1889, 1895, 1599, 2153, 2677, 1505, 1876, 1656, 929, 2912, 569, 3054, 2362, 2656, 1245, 3044, 429, 69, 1525, 1195, 2709, 2168, 704, 276, 2228, 2178, 1764, 821, 436, 1295], "6027": [2554, 294, 2928, 1659, 2928, 920, 224, 810, 3142, 2534, 1108, 718, 3054, 569, 2384, 803, 608, 436, 2914, 2424, 2737, 768, 502, 946, 2594], "6439": [1121, 911, 964, 1235, 653, 2668, 2928, 920, 224, 3097, 706, 1656, 276, 635, 2424, 2737], "6824": [2846, 2918, 1466, 2024, 653, 359, 861, 920, 224, 3097, 2510, 1195, 635, 3054, 569, 2902, 2645, 436], "2633": [454, 2060, 1540, 653, 1304, 3164, 920, 224, 810, 464, 1607, 2549, 2524, 1108, 2912, 2479, 533, 928, 569, 3054, 83, 803, 1762, 2501, 2645, 436, 1530, 502, 1525], "406": [2846, 2464, 593, 861, 152, 2063, 920, 224, 3097, 1889, 1113, 3143, 2265, 1147, 2285, 440], "9359": [2554, 166, 128, 3029, 846, 1881, 1085, 920, 224, 810, 1428, 1656, 1391, 569, 3051, 2409, 1147, 440], "5058": [3040, 1079, 2281, 2928, 497, 1777, 920, 224, 3097, 1001, 588, 1213, 1796, 257], "1131": [89, 433, 17, 2928, 2518, 846, 920, 1144, 1761, 760, 1656, 1895, 635, 859, 1570, 1147, 41], "695": [1234, 3152, 1902, 653, 54, 846, 920, 224, 3097, 706, 588, 1607, 257, 928, 3054, 569, 2902, 1796, 436, 1530, 1213, 1028, 1147], "7969": [2665, 509, 2928, 1659, 861, 920, 224, 3097, 329, 2549, 2524, 83, 139, 2362, 2501, 768, 3057], "8173": [89, 684, 2910, 2425, 846, 3103, 2063, 920, 224, 810, 1369, 1895, 928, 584, 1228, 1530, 717, 569, 3054, 2656, 3044, 751, 1607, 2660, 728, 733, 2735, 276, 763, 2178, 635, 608, 643, 436, 689], "4834": [1948, 3152, 653, 210, 48, 920, 224, 810, 3142, 2549, 2524, 1108, 257, 83, 3054, 803, 2501, 436, 502, 1481, 440], "7395": [1554, 911, 471, 2928, 131, 757, 920, 224, 810, 464, 1607, 928, 3054, 569, 2902, 2168, 1530, 436, 2153, 2677], "5160": [2846, 421, 2223, 2928, 131, 2282, 920, 224, 810, 1102, 2737, 928, 569, 2168, 276, 2424, 2153, 2677], "692": [438, 2770, 1551, 846, 759, 1649, 920, 224, 810, 1614, 588, 257, 929, 1013, 928, 139, 2168, 2764, 1796, 2153, 1213, 69, 1525, 751], "6835": [1640, 619, 955, 861, 152, 2282, 920, 224, 3097, 706, 326, 966, 2960, 139, 3054, 2456, 569, 859, 2362, 828, 1147, 1570, 276, 436, 2676, 3019, 1525, 2335, 440], "8760": [2665, 1535, 640, 2757, 861, 468, 48, 920, 224, 3097, 706, 928, 569, 139, 276, 802, 2645, 1028, 2661], "8620": [1951, 421, 1238, 1110, 2323, 725, 2928, 920, 224, 3097, 400, 2549, 2524, 1195, 83, 2362, 2501, 2645, 821, 768, 1147, 1505], "6155": [1121, 226, 3077, 3084, 762, 861, 920, 224, 3097, 400, 1968, 717, 3061, 2735, 2645, 2424, 2737, 751], "8564": [1951, 421, 128, 846, 3103, 2063, 920, 224, 810, 3142, 569], "6912": [3048, 509, 364, 2323, 1626, 653, 920, 224, 3097, 400, 588, 257, 675, 1796, 2645, 2194, 1213], "2240": [2347, 3152, 964, 1749, 1047, 2063, 920, 224, 3097, 706, 2737, 1362, 2424, 802, 390], "5469": [1234, 3152, 1636, 653, 1225, 2063, 920, 224, 3097, 1889, 2107, 2362], "9128": [438, 1191, 937, 2323, 725, 349, 920, 224, 3097, 400, 1013, 569, 2168, 2764, 608, 2424, 2737], "7908": [515, 165, 923, 1911, 653, 210, 3084, 920, 224, 810, 553, 2990, 1387, 2168, 1231, 2362, 1066, 1113, 2153], "391": [438, 1535, 2222, 519, 846, 759, 1047, 920, 224, 3097, 400, 2267, 139, 569, 853, 173, 3009, 802, 751], "5275": [1234, 3152, 1681, 846, 759, 1085, 920, 1907, 2185, 1424, 1607, 2936, 928, 569, 2384, 1530, 2661], "3369": [2554, 476, 2223, 861, 213, 2282, 920, 224, 810, 394, 201, 1108, 1391, 1645, 928, 2737, 3054, 569, 2480, 2424, 2613, 83, 803, 2643, 502, 440, 2549, 2524, 2617, 635, 2384, 2501, 436, 1147], "5524": [1133, 2864, 1348, 3084, 2422, 653, 920, 224, 3097, 2510, 1108, 2912, 1387, 635, 139, 3054, 569, 803, 436, 502, 1525], "8299": [2846, 2464, 838, 735, 846, 2787, 3023, 920, 224, 2867, 2513, 1895, 2479, 928, 2737, 1530, 2153, 2894, 257, 569, 2362, 802, 2424, 1525, 1607, 83, 2168, 139, 916, 1796, 276, 763, 2549, 2524, 588, 1762, 2501, 1213], "3103": [1550, 216, 3020, 1795, 861, 152, 653, 920, 224, 3097, 706, 929, 1895, 139, 3054, 569, 2902, 608, 2362, 2656, 704, 1147, 436, 2914, 69, 2178], "1002": [308, 1036, 1055, 653, 2668, 3164, 920, 224, 810, 2204, 928, 2645, 1387], "1547": [1726, 1618, 640, 861, 2484, 861, 920, 224, 3097, 1398, 1607, 928, 569, 1530, 2362], "829": [2248, 1713, 861, 1114, 846, 920, 224, 3097, 2510, 588, 2549, 2524, 257, 83, 139, 569, 1796, 2501, 802, 1213, 3057], "7692": [1951, 421, 964, 846, 1881, 3164, 920, 224, 3097, 1025, 1391, 635, 2362, 276, 821, 768, 1147, 440], "885": [1951, 165, 452, 846, 3103, 3045, 2814, 119, 1644, 2208, 704, 1885, 569, 2362], "300": [1951, 2770, 1540, 653, 1304, 757, 920, 224, 3097, 1889, 1108, 840, 1895, 859, 1570, 2737, 3054, 2362, 2656, 2424, 1387, 83, 803, 276, 502, 2178, 2549, 2524, 2384, 2902, 2724, 2501, 436], "8736": [3048, 1535, 2453, 3084, 2032, 861, 920, 224, 3097, 706, 1656, 1013, 2168, 2764, 2153], "3565": [2846, 2464, 1301, 861, 152, 757, 920, 224, 810, 464, 1764, 2479, 20, 139, 569, 2039, 2478, 1762, 1245, 2424, 2737, 2335, 2734, 1876], "6571": [1550, 3152, 42, 2622, 2928, 1616, 1174, 920, 224, 3097, 1889, 2936, 635, 569, 2384, 276, 2645, 2409, 2677, 465, 2661], "2476": [1199, 1417, 2801, 2251, 846, 1881, 1085, 920, 224, 810, 2204, 2549, 2524, 635, 83, 2501, 2645], "39": [3048, 2864, 2801, 2323, 1963, 3164, 920, 224, 810, 2204, 588, 257, 2912, 2479, 569, 1762, 1796, 768, 2424, 2737, 1213, 1525, 3057], "7900": [1948, 3152, 3013, 653, 691, 2814, 119, 1644, 1370, 2549, 2524, 2936, 83, 2384, 276, 2501, 2424, 2645, 2737, 1525], "8314": [3040, 3152, 334, 2928, 2198, 3164, 920, 224, 3097, 706, 1607, 2502, 2962, 533, 928, 569, 1608, 1530, 486, 3057], "8236": [515, 221, 1540, 633, 846, 1881, 653, 920, 224, 3097, 1132, 3054, 436, 2902], "8835": [1133, 2770, 2801, 861, 152, 846, 920, 224, 810, 394, 598, 2384, 2936], "3924": [2665, 1417, 1254, 347, 653, 54, 653, 920, 224, 3097, 706, 588, 1764, 257, 139, 569, 2168, 1796, 1245, 802, 2645, 2153, 1213], "1198": [194, 2770, 630, 1373, 653, 210, 1649, 920, 224, 3097, 1997, 1656, 2068, 3044], "3555": [1550, 1417, 1798, 653, 1569, 2928, 920, 224, 3097, 706, 1607, 2153, 928, 569, 1599, 1530, 2228, 763, 751], "4574": [1521, 307, 2144, 2799, 653, 784, 861, 920, 224, 3097, 400, 1108, 717, 139, 3054, 928, 803, 2735, 436, 502, 1627], "2618": [89, 2446, 2548, 415, 2928, 2485, 48, 920, 224, 3097, 329, 2502, 2479, 2962, 447, 139, 569, 1762, 1608, 802, 821, 486], "710": [2069, 2864, 1202, 861, 1974, 2928, 920, 224, 3097, 2510, 2549, 2524, 2936, 2299, 83, 3051, 276, 2501, 3044, 2424, 2737, 1295, 2336, 3057, 2661], "5025": [1554, 619, 964, 653, 1304, 1085, 920, 224, 3097, 1889, 2912, 1387, 139, 2724, 802, 1525], "1929": [2605, 1222, 340, 1685, 861, 2433, 1085, 920, 224, 3097, 2510, 588, 257, 2936, 928, 2384, 2895, 1796, 2424, 2442, 2737, 3044, 1213], "5865": [2554, 476, 1902, 653, 2243, 861, 920, 224, 3097, 706, 1895, 3054, 2902, 2178, 2656, 318, 436, 2424, 2645, 2737, 2184, 3057], "6014": [89, 294, 653, 856, 1649, 920, 224, 3097, 400, 569, 276], "3863": [1550, 307, 794, 861, 152, 846, 920, 224, 810, 2201, 2734, 169, 2936, 2962, 635, 928, 569, 3114, 822, 1608, 2645, 2424, 768, 2737, 2728, 1147, 763, 751, 2661], "891": [1234, 3152, 2801, 653, 2243, 3164, 920, 224, 810, 464, 1013, 2764, 2645, 2424, 2737, 751], "8656": [3048, 1713, 865, 1878, 2928, 2485, 2928, 920, 224, 810, 3142, 276, 768], "3885": [2846, 3152, 51, 3133, 653, 287, 48, 920, 1907, 1612, 2327, 588, 1968, 2737, 257, 3061, 928, 3054, 2902, 1796, 436, 2424, 1530, 1213, 1147], "4281": [2665, 2918, 964, 2757, 861, 152, 653, 920, 224, 3097, 706, 1013, 751, 569, 2384, 2764, 802, 2424, 2737, 1505], "8047": [1948, 1565, 2453, 861, 2484, 653, 920, 224, 3097, 706, 1147, 2384, 2936], "7126": [2846, 421, 653, 2243, 861, 920, 224, 810, 1102, 1607, 588, 257, 928, 569, 1228, 584, 1796, 3044, 1530, 1213], "6186": [1199, 509, 1399, 861, 538, 3164, 920, 224, 810, 2204, 1656, 2936, 635, 2384, 2645, 3044, 2839, 2409, 2661], "231": [2598, 166, 51, 3109, 2323, 161, 1084, 1649, 2822, 920, 1907, 1612, 2327, 527, 139, 569, 162, 2574, 276, 946, 440], "3248": [454, 221, 1902, 1047, 3127, 1649, 920, 224, 3097, 706, 588, 1968, 1764, 257, 2479, 3061, 569, 1762, 1796, 1245, 768, 2424, 2737, 1213], "3026": [2665, 2060, 964, 846, 1881, 48, 920, 224, 3097, 706, 2534, 1391, 569, 2384, 1147, 2335, 1525, 440], "8942": [308, 3152, 591, 403, 3084, 782, 48, 1436, 920, 1907, 1612, 2327, 1968, 1895, 3061, 3054, 2656, 436, 768, 2914, 1147, 1525, 2178], "4652": [515, 221, 50, 1373, 861, 152, 2063, 920, 224, 810, 754, 1074, 257, 2479, 527, 569, 430, 2760, 1762, 2424, 2737], "284": [2554, 476, 282, 1361, 653, 784, 653, 920, 1144, 1761, 760, 2549, 2524, 2962, 83, 569, 1608, 821, 2645, 3044, 276, 2501], "4447": [1133, 509, 1636, 2323, 2921, 861, 920, 224, 3097, 706, 1570, 569, 2645, 859, 836], "7057": [2069, 2060, 536, 2323, 2928, 920, 224, 3097, 400, 588, 1213, 1796, 257, 3044], "7764": [2846, 476, 2801, 2714, 2928, 131, 2282, 920, 224, 3097, 706, 2549, 2524, 83, 569, 2501, 318, 2424, 276, 2737, 2409, 2184], "1504": [1948, 3152, 964, 653, 2243, 2063, 920, 224, 3097, 1889, 588, 1607, 257, 2912, 928, 569, 1796, 768, 1530, 1213, 1028, 1147, 1525, 3057], "5559": [2554, 1417, 28, 2928, 1659, 653, 920, 224, 810, 394, 635, 276, 2645, 1387], "2304": [1951, 3152, 58, 2323, 1963, 2282, 920, 224, 810, 2204, 1391, 2912, 2645, 2424, 2737, 1147, 1525, 3057, 440], "462": [515, 3152, 964, 653, 2668, 653, 920, 224, 3097, 706, 929, 635, 533, 704, 69, 440], "7551": [1951, 1565, 964, 846, 1881, 3164, 920, 224, 3097, 706, 2549, 2524, 83, 2384, 2501, 2645, 276, 2424, 2737, 3057], "1356": [1554, 1535, 640, 653, 2243, 2282, 920, 224, 3097, 1997, 2549, 2524, 83, 2501, 2645, 276, 751], "5026": [89, 2446, 2801, 2928, 473, 1085, 920, 224, 810, 1369, 2990, 588, 1108, 257, 1013, 1213, 139, 3054, 1231, 2764, 2168, 803, 1796, 802, 1113, 436, 2153, 502, 465], "1848": [839, 294, 1081, 2323, 2047, 2282, 920, 224, 3097, 706, 1968, 3061, 2384, 2645, 2914, 3044, 751], "60": [2069, 2060, 964, 2308, 861, 152, 757, 920, 224, 3097, 706, 2549, 2524, 1108, 83, 3054, 803, 2362, 2501, 436, 768, 502, 1028, 1147, 2734], "1370": [1951, 165, 2223, 861, 213, 653, 920, 224, 3097, 706, 1607, 2524, 2549, 928, 569, 83, 2362, 276, 2645, 2501, 1530, 1028], "3239": [2347, 2864, 238, 653, 2668, 1649, 920, 224, 3097, 400, 2549, 2524, 2534, 1108, 929, 83, 3054, 2384, 803, 704, 2501, 436, 502, 69], "6788": [1554, 1417, 2928, 2485, 2323, 920, 224, 3097, 2510, 2912, 2645, 2424, 2737, 69, 1525, 1876], "2188": [1951, 2770, 2932, 861, 2611, 2063, 920, 224, 810, 2201, 2350, 1013, 2645, 53, 2153, 1548, 486, 257, 569, 2764, 2362, 1525, 1745, 2130, 139, 2168, 1796, 440, 588, 2502, 3092, 1213, 1147], "6877": [1521, 1079, 143, 861, 2484, 1085, 920, 224, 3097, 706, 2549, 2524, 395, 1013, 83, 2764, 3161, 2501, 2645, 1548, 946], "7898": [1554, 221, 2166, 1998, 653, 1225, 3164, 920, 1144, 1761, 760, 2912, 395, 2061, 3161, 276, 2424, 3044, 2737, 1525], "8052": [1951, 165, 3167, 2323, 1963, 2919, 2814, 119, 451, 957, 1108, 2912, 1013, 3054, 2764, 803, 276, 2645, 436, 502, 1525], "329": [1234, 3152, 496, 861, 2484, 653, 920, 224, 810, 2204, 1656, 1391, 916, 821, 3044, 1147, 440], "9103": [454, 1191, 2307, 653, 106, 846, 920, 224, 3097, 2510, 1074, 1362, 430, 2760, 2424, 2737, 390], "3423": [2248, 1535, 1636, 653, 1225, 3164, 920, 224, 3097, 400, 588, 1764, 257, 569, 1796, 1245, 2424, 2737, 1213, 440], "2882": [1199, 2918, 29, 861, 152, 3164, 920, 224, 3097, 706, 1656, 2409, 1525, 2912, 2661], "5450": [2846, 421, 129, 40, 653, 2243, 1777, 920, 224, 810, 918, 2660, 1505, 855, 704, 318, 1431, 1295, 2184, 3057, 440], "9397": [194, 221, 1902, 2323, 1963, 1649, 920, 224, 3097, 706, 1195, 1764, 1260, 139, 569, 2362, 1111, 3004, 1245, 2424, 2737, 1525], "2498": [1550, 165, 2652, 861, 992, 2814, 119, 1644, 1198, 1108, 1147, 2645, 2737, 1548, 1656, 257, 2960, 569, 3054, 2424, 3044, 83, 803, 1796, 276, 502, 2549, 2524, 588, 2936, 635, 2384, 2902, 608, 2501, 436, 1213, 3019], "1293": [1234, 3152, 838, 653, 1539, 757, 920, 224, 810, 1428, 139, 569, 608, 318, 2914, 3044, 69, 2184, 1876], "2219": [1051, 307, 2085, 1202, 653, 359, 846, 920, 224, 3097, 329, 2537, 635, 569, 318, 276, 2184], "3597": [2846, 1713, 2928, 2198, 846, 920, 224, 810, 2204, 1656, 569, 2645, 2424, 2737], "8566": [515, 1943, 640, 653, 2668, 48, 920, 224, 3097, 2510, 2549, 2732, 2524, 1108, 83, 3054, 2902, 803, 2362, 276, 436, 2424, 2501, 2737, 502, 1028, 1854], "4085": [1133, 1417, 593, 846, 1881, 2282, 920, 224, 810, 553, 2115, 1195, 2534, 929, 2384, 2362, 704, 1762, 69, 1525], "8591": [2858, 509, 2928, 892, 2928, 920, 224, 3097, 2510, 929, 1387, 704, 2645, 69, 751], "3725": [438, 166, 2355, 861, 2611, 48, 920, 224, 3097, 706, 1801, 2728, 569, 2424, 2737], "6695": [515, 1222, 9, 1329, 846, 654, 1649, 920, 1907, 2185, 1043, 2534, 929, 69, 2384, 2362, 1147], "6345": [1234, 3152, 1540, 653, 2243, 846, 920, 224, 3097, 400, 1147, 2645, 1387], "531": [3048, 2446, 640, 2323, 2059, 3164, 920, 224, 3097, 1889, 1108, 1764, 1342, 3054, 855, 569, 803, 704, 2638, 821, 1431, 1245, 436, 502, 751], "2431": [194, 2864, 2801, 861, 2845, 2282, 920, 224, 810, 3142, 929, 2912, 1147, 704, 2424, 2737, 69, 1525], "1956": [1121, 2770, 129, 2887, 653, 2243, 1085, 920, 224, 3097, 1889, 1607, 1075, 2737, 928, 569, 2061, 276, 2424, 1530, 1548, 751], "4017": [3040, 684, 2223, 861, 213, 1085, 920, 224, 810, 1102, 1656, 1362, 276, 2645, 2424, 802, 2737, 390], "8718": [670, 2864, 1540, 2928, 473, 1649, 920, 224, 3097, 706, 1656, 2534, 635, 2384, 853, 1113, 3143, 2265, 1548, 2285], "5439": [438, 2770, 1867, 2928, 1659, 2928, 920, 224, 3097, 706, 2734, 763, 2424, 751, 2737], "8434": [1550, 1565, 51, 2522, 827, 846, 2639, 267, 2063, 2573, 920, 1907, 1612, 2327, 569, 2384, 3044], "2092": [1951, 3152, 541, 861, 213, 691, 920, 224, 3097, 2642, 2549, 2524, 1606, 1387, 2936, 83, 2724, 2362, 704, 276, 2645, 2424, 2501, 2737, 1525, 2661], "8772": [1199, 2060, 2213, 771, 846, 1881, 846, 920, 224, 810, 754, 2549, 2524, 2283, 2479, 635, 139, 83, 2061, 2902, 2362, 1762, 2501, 802, 2645], "8527": [308, 955, 861, 213, 2003, 920, 224, 810, 918, 139, 802, 2424, 2737], "1536": [1234, 3152, 1609, 846, 673, 1649, 920, 224, 3097, 400, 1391, 383, 2661, 257, 3054, 569, 1912, 2362, 3044, 2409, 1525, 2534, 139, 1796, 440, 588, 2936, 635, 2384, 2902, 608, 436, 1213, 1147], "7156": [2554, 619, 2436, 861, 1615, 653, 920, 1907, 2185, 1043], "3590": [308, 2360, 861, 2164, 2928, 920, 224, 810, 3030, 2385, 2936, 460, 2790, 2337, 577, 2661], "7184": [2598, 2770, 1540, 2928, 131, 1085, 920, 224, 810, 2201, 3050, 257, 2936, 83, 139, 2384, 584, 1228, 276, 3044, 3108, 1147, 2130, 440], "1092": [2554, 1222, 60, 846, 759, 1649, 920, 224, 3097, 1291, 1856, 569, 344, 802, 2362], "8694": [1554, 509, 2140, 653, 1304, 2919, 2814, 119, 1644, 2208, 1656, 1391, 2962, 822, 1608, 276, 2728, 1147, 440], "7063": [515, 165, 3102, 2203, 3084, 971, 861, 920, 1144, 1761, 760, 1108, 2660, 1895, 635, 3054, 569, 2061, 803, 2656, 2178, 608, 436, 2424, 2737, 3108, 502, 751], "8583": [3068, 476, 50, 2323, 2047, 653, 920, 224, 810, 1102, 1656, 588, 257, 1796, 1213, 3088, 1525], "4628": [2858, 1713, 1830, 2928, 1661, 861, 920, 224, 3097, 706, 2549, 2524, 2534, 1391, 2912, 1387, 2962, 635, 83, 2384, 1608, 276, 2424, 3044, 2737, 2501, 1147, 1525, 440], "8385": [515, 2142, 1883, 653, 524, 2063, 920, 224, 3097, 1889, 1013, 2764, 1732, 318, 2677, 2184], "4853": [3068, 1943, 1540, 861, 152, 3164, 920, 224, 810, 3142, 1656, 929, 1895, 2962, 139, 569, 1147, 1608, 276, 2677, 69, 41, 440], "4974": [1449, 1191, 895, 653, 2668, 2928, 920, 224, 2798, 606, 704, 318, 257, 2184], "4214": [2248, 2446, 2121, 653, 2313, 1649, 920, 1907, 2185, 1043, 1656, 2645], "2181": [670, 1417, 707, 2053, 846, 45, 3164, 920, 224, 3097, 329, 2912, 2936, 2479, 569, 2384, 1762, 1525, 440], "7233": [194, 476, 1036, 846, 3103, 2063, 920, 224, 3097, 1025, 440, 1147, 2384, 3044, 2936], "7311": [1521, 1535, 2430, 846, 1389, 1085, 920, 224, 3097, 400, 569, 3044, 440], "1223": [1948, 3152, 964, 861, 621, 757, 920, 224, 3097, 400, 2534, 2962, 859, 1570, 1608, 821, 946, 440], "1738": [438, 2060, 2052, 653, 2243, 653, 920, 224, 3097, 400, 1195, 751, 569, 608, 2362, 2645, 768, 1548, 946, 1505], "7784": [1948, 3152, 452, 861, 213, 266, 2814, 119, 1644, 1370, 1108, 3054, 569, 803, 436, 2424, 2737, 502, 2677], "860": [2554, 476, 2323, 725, 1047, 920, 224, 3097, 2510, 1013, 2764, 802, 768, 2442, 3044, 2645, 2677], "5872": [515, 3152, 29, 2928, 131, 48, 920, 224, 3097, 706, 1074, 1968, 1656, 257, 3061, 1699, 430, 2760, 2424, 2737], "2772": [1234, 3152, 864, 653, 653, 920, 1907, 2185, 1043, 704, 139, 569], "2607": [1554, 2464, 3047, 507, 861, 960, 575, 2063, 2573, 920, 1907, 1612, 2327, 2936, 2962, 1608, 3044, 751, 2661], "7727": [2352, 1535, 1540, 861, 152, 1085, 920, 224, 3097, 706, 928, 859, 828, 853, 822, 1570, 1530, 1548, 2728, 1656, 2415, 569, 2456, 1912, 2362, 1113, 2409, 841, 1607, 1195, 2709, 139, 2643, 276, 1447, 2384, 719, 768, 3088], "6801": [2248, 2464, 2222, 861, 2484, 2928, 920, 224, 3097, 2510, 2479, 3054, 1762, 436, 821, 802, 502, 1147, 440], "6802": [89, 1079, 2281, 861, 1955, 2282, 920, 224, 3097, 706, 2737, 2677, 2912, 569, 2362, 1245, 2424, 1525, 1195, 2709, 2660, 139, 83, 276, 440, 2549, 2524, 1764, 2501, 821, 3088, 1147], "9375": [194, 509, 2477, 653, 856, 2928, 920, 1144, 1761, 760, 1195, 635, 2362, 3044, 2424, 2737], "5680": [1234, 3152, 964, 1894, 653, 1304, 1085, 920, 224, 810, 464, 2645, 2737, 1028, 2912, 1606, 569, 3054, 2362, 1245, 2424, 1113, 802, 1525, 83, 276, 440, 2549, 2524, 1764, 2902, 2501, 821, 436, 1147], "892": [839, 1191, 2440, 2928, 405, 861, 920, 224, 3097, 400, 588, 1391, 257, 69, 139, 569, 1912, 859, 2362, 608, 1570, 1796, 2645, 802, 1213, 1147, 1525, 440], "6783": [89, 2770, 471, 653, 2668, 1085, 920, 224, 810, 394, 1548, 276, 751], "2028": [1449, 2918, 1540, 1894, 653, 600, 1649, 920, 224, 810, 1218, 3019, 2960, 1525, 2912], "5989": [1948, 3152, 1081, 846, 1881, 653, 920, 224, 3097, 706, 2737, 2424, 853, 3044], "7658": [2248, 1618, 1540, 653, 2243, 3164, 920, 224, 3097, 2210, 1864, 257, 635, 395, 569, 2168, 584, 1228, 3161, 440, 276, 2409, 1711, 2130, 2661], "4135": [2069, 2770, 79, 1400, 846, 1881, 2063, 920, 224, 2867, 768, 1147, 1525, 3044, 2912], "1278": [1640, 3152, 1778, 2615, 861, 621, 846, 920, 224, 810, 3030, 276, 2645, 2724, 1387], "6591": [2665, 1222, 1081, 2928, 1616, 1649, 920, 224, 3097, 400, 569, 2645, 763, 1387], "1202": [670, 2770, 472, 2262, 653, 1304, 2282, 920, 224, 810, 1428, 2661, 276, 853, 2936], "2429": [1521, 1943, 2140, 861, 1955, 3045, 920, 224, 3097, 1889, 257, 635, 569, 1548, 2335, 465, 2130], "6442": [2598, 433, 1902, 2928, 473, 1085, 920, 224, 3097, 706, 2990, 928, 1231, 2319, 276, 1113, 2424, 2737], "7689": [1051, 1222, 915, 846, 1881, 48, 920, 224, 3097, 400, 929, 139, 859, 1570, 3044, 69], "3603": [1550, 307, 2223, 861, 213, 757, 920, 224, 810, 1102, 2549, 2524, 966, 2960, 1895, 2936, 83, 2384, 853, 276, 2501, 3019, 2661], "3694": [839, 1222, 964, 861, 213, 48, 920, 224, 3097, 706, 1607, 1662, 928, 569, 1362, 2168, 1530, 276, 2645, 2153, 751, 390], "4285": [1640, 3152, 2640, 633, 861, 2484, 653, 920, 224, 810, 1102, 2549, 2524, 83, 569, 2501], "6718": [1449, 911, 2223, 861, 2845, 1777, 2814, 119, 1644, 1850, 1013, 2265, 2153, 2894, 2285, 1656, 569, 2764, 1113, 3044, 69, 2710, 2534, 780, 139, 2168, 2629, 276, 3025, 635, 2384, 608, 3143], "1623": [2858, 1713, 899, 148, 349, 1323, 2323, 920, 224, 3097, 329, 2549, 2524, 83, 2501, 2645, 2424, 2737, 1505], "1034": [1948, 1565, 2256, 13, 1354, 861, 142, 48, 418, 920, 1907, 1612, 2327, 2362, 276, 2424, 2737, 1028, 751], "5191": [2605, 2770, 1602, 1310, 653, 3164, 920, 224, 3097, 706, 1764, 1895, 2479, 751, 569, 3054, 2178, 2656, 1762, 276, 2645, 1245, 2424, 2737, 436, 1295, 1147, 1505], "4180": [1521, 1222, 964, 985, 2928, 1659, 2928, 920, 224, 3097, 706, 1391, 139, 2168, 569, 1912, 859, 2362, 1570, 2153, 1147, 1525, 440], "6611": [3040, 1943, 1540, 861, 213, 846, 920, 224, 3097, 1889, 2549, 2524, 83, 2362, 2501, 802, 2424, 2737, 1028], "2025": [515, 3152, 3122, 861, 1746, 653, 920, 224, 2867, 2513], "4144": [2665, 2864, 842, 2928, 2518, 3164, 920, 1144, 1761, 760, 1108, 2912, 3054, 803, 436, 2409, 502, 1525], "9061": [1554, 2446, 1540, 653, 2243, 2063, 920, 224, 810, 2204, 1656, 2912, 929, 2168, 1362, 1147, 390, 704, 318, 2645, 2153, 69, 1525, 2184, 440], "7566": [308, 3152, 995, 861, 152, 2063, 920, 224, 3097, 400, 318, 2645, 2424, 2737, 3057, 1147, 2184, 1505, 1028], "6708": [1554, 1222, 1830, 653, 2668, 3164, 920, 224, 3097, 400, 1607, 1391, 928, 569, 2168, 859, 1530, 1570, 802, 768, 2153, 3057, 1147, 1505, 440], "3412": [1951, 3152, 357, 2323, 2756, 1047, 920, 1907, 1612, 2327, 2491, 2936, 569, 3051, 2409, 1147, 751, 2661], "3846": [2347, 1079, 2927, 653, 1499, 757, 920, 224, 3097, 706, 2912, 569, 2384, 1147, 440, 2645, 69, 1525, 1876], "3128": [1121, 509, 2979, 1979, 861, 1974, 1649, 920, 224, 810, 1607, 928, 569, 1532, 1530], "1205": [1554, 2918, 2984, 861, 2484, 2928, 920, 224, 810, 1919, 588, 1213, 1796, 1147], "2850": [308, 3152, 1540, 1235, 861, 152, 48, 920, 224, 810, 2204, 2549, 2524, 1391, 1387, 2962, 83, 2724, 2362, 1608, 2645, 276, 2501, 1028, 1147, 440], "194": [839, 2918, 1385, 653, 2243, 1085, 920, 224, 3097, 706, 2549, 2524, 2737, 2912, 2502, 1525, 83, 2168, 2501, 2424, 2153, 486], "5459": [438, 1713, 2223, 3029, 48, 2282, 920, 224, 810, 1369, 1387, 751, 2724, 2362, 276, 2424, 2737, 3057, 1525, 2734, 440], "8929": [1640, 3152, 2106, 1127, 2928, 2485, 3084, 920, 224, 810, 1161, 1656, 929, 139, 859, 1570, 802, 69, 1525], "3930": [2665, 1535, 630, 867, 846, 759, 861, 920, 224, 3097, 706, 2724, 1387], "4765": [194, 166, 364, 861, 152, 1649, 920, 224, 3097, 1997, 1108, 2912, 1525, 2502, 635, 139, 3054, 162, 2574, 803, 802, 2424, 436, 2737, 2409, 502, 486, 751, 2661], "115": [2069, 1417, 2354, 2928, 1605, 846, 920, 1907, 2185, 1043, 929, 569, 859, 608, 1570, 3051, 3044, 69], "145": [2665, 2918, 1336, 861, 1955, 1085, 920, 224, 810, 464, 2990, 2479, 3054, 2384, 2902, 1231, 1762, 276, 436, 2424, 1113, 2737], "2383": [1234, 3152, 414, 2323, 725, 653, 920, 224, 3097, 400, 2534, 2384, 2645, 751], "7763": [1951, 3152, 1636, 861, 1974, 1085, 920, 224, 3097, 1997, 2549, 2524, 83, 2501, 2424, 2737, 2734], "8948": [1550, 684, 861, 213, 3164, 920, 224, 810, 2204, 1607, 1342, 928, 569, 139, 2638, 802, 1530], "535": [1051, 1079, 2928, 473, 2063, 920, 224, 810, 2101, 1013, 3054, 569, 2764, 803, 276, 436, 502, 751], "3947": [3040, 433, 352, 846, 759, 1085, 920, 224, 3097, 1408, 1607, 2549, 2524, 588, 257, 1387, 533, 928, 569, 83, 859, 2724, 1570, 318, 1796, 2501, 1530, 1213, 2184], "6441": [515, 165, 2121, 2323, 3164, 560, 920, 1907, 1612, 2327, 1342, 635, 928, 2638, 276, 821, 2677, 1509, 1505], "1973": [3068, 1535, 2620, 653, 210, 2063, 920, 224, 810, 326, 2350, 1895, 859, 1570, 2813, 2265, 2676, 2285, 1876, 1656, 2661, 3065, 257, 929, 2912, 3054, 569, 2362, 2656, 318, 1113, 105, 3044, 2409, 69, 1525, 2184, 1745, 2962, 139, 381, 101, 704, 2075, 1796, 2983, 763, 2178, 440, 588, 2902, 3092, 436, 3143, 1213, 1147, 3057], "967": [1951, 2770, 794, 846, 1881, 48, 920, 224, 810, 754, 2709, 276, 1548, 1147, 1505, 440], "7919": [2598, 165, 2085, 2042, 861, 1974, 861, 920, 1144, 1761, 760, 2549, 2524, 83, 2501, 751], "9378": [2858, 2465, 2957, 223, 861, 231, 846, 920, 224, 3097, 2510, 1607, 928, 569, 1362, 276, 1530, 751, 390], "4831": [1554, 3152, 1636, 589, 2928, 80, 3164, 920, 224, 810, 464, 2549, 2524, 83, 569, 1362, 608, 2501, 821, 276, 2645, 2737, 2424, 802, 2677, 390], "2918": [839, 1079, 128, 861, 2611, 1649, 920, 224, 810, 394, 1108, 928, 2645, 1530, 2737, 3054, 569, 2362, 802, 2424, 751, 1607, 83, 139, 803, 276, 502, 763, 2549, 2524, 635, 608, 2501, 436, 3057], "4520": [194, 166, 905, 2323, 1963, 1649, 920, 224, 3097, 400, 588, 257, 569, 1796, 2645, 768, 1213], "5428": [1449, 911, 2587, 2928, 1605, 2928, 920, 224, 810, 1302, 1876, 2936, 2362, 1147, 440, 69, 2661], "1144": [454, 619, 2876, 846, 1389, 2282, 920, 224, 3097, 1025, 2645], "2652": [1234, 3152, 2453, 2404, 2323, 1818, 2928, 920, 224, 3097, 2510, 1764, 2479, 569, 1762, 1245, 2645, 2424, 2737], "1180": [515, 1222, 2, 861, 44, 2282, 920, 1907, 1612, 795, 2549, 2524, 395, 139, 83, 3161, 276, 2501, 751], "3700": [1521, 1191, 3047, 1650, 403, 653, 181, 2010, 846, 1754, 920, 1907, 1612, 316, 2534, 257, 91, 2912, 2384, 1431, 1525, 440], "2125": [1640, 509, 1540, 846, 1372, 861, 920, 224, 3097, 706, 1108, 2960, 2912, 635, 139, 3054, 2168, 803, 1147, 436, 768, 2153, 502, 3019, 1525, 2734, 440], "5938": [1521, 1191, 1540, 861, 152, 48, 920, 224, 3097, 400, 929, 855, 704, 2645, 1431, 69, 1505], "2538": [515, 221, 1622, 2925, 2928, 2738, 3084, 1526, 920, 1907, 1612, 2327, 1656, 569, 2384, 584, 1228, 2645, 440], "271": [2665, 1535, 653, 1085, 920, 224, 810, 553, 588, 2960, 928, 139, 2645, 3044, 2424, 2737, 3019], "2631": [515, 221, 2212, 653, 2668, 757, 920, 224, 810, 918, 1656, 588, 2612, 1391, 2936, 2962, 928, 2384, 3051, 1608, 1796, 3044, 1213, 1028, 1147, 751, 440], "7891": [2554, 1417, 2223, 249, 861, 152, 3164, 920, 224, 810, 1102, 588, 257, 929, 1691, 139, 1362, 2362, 1796, 1213, 1028, 69, 1505, 390], "4784": [308, 3152, 1883, 846, 45, 653, 920, 224, 3097, 1025, 1013, 569, 2168, 2764, 2153, 3108], "2688": [1951, 421, 1622, 377, 2323, 2610, 2323, 920, 1144, 1761, 760, 1147, 2645], "5271": [2069, 2446, 498, 989, 861, 231, 846, 920, 224, 3097, 329, 139, 569, 257], "3179": [454, 2446, 712, 861, 213, 2919, 920, 224, 810, 1428, 1656, 2549, 2524, 966, 2960, 2936, 83, 2384, 853, 276, 2645, 2501, 3019], "3890": [1640, 1535, 630, 2768, 2323, 676, 2323, 920, 224, 3097, 400, 1308, 635, 2168, 276, 2645, 2153], "6458": [515, 3152, 2192, 1047, 653, 920, 1907, 2185, 1043, 588, 257, 1213, 2362, 1796, 318, 1295, 1028, 2184, 3057], "7312": [3068, 476, 128, 861, 2611, 3023, 920, 224, 810, 1428, 1656, 2549, 1195, 1391, 1968, 2524, 2936, 3061, 635, 83, 2168, 2362, 440, 2501, 2645, 3044, 768, 2153, 2734, 2661], "5757": [2858, 509, 1513, 861, 2484, 2282, 920, 224, 810, 1102, 1391, 2737, 257, 2936, 2962, 139, 569, 2168, 2384, 2362, 3051, 1608, 802, 3044, 2424, 2153, 440, 1147, 1525, 2130, 2661], "4952": [1133, 1079, 2928, 1659, 653, 920, 224, 810, 2204, 1764, 929, 569, 704, 1245, 2677, 69, 1876], "3225": [2347, 2864, 2903, 653, 1403, 846, 920, 224, 810, 464, 588, 1108, 257, 2912, 1525, 2502, 1213, 3054, 2902, 803, 608, 1796, 2645, 2424, 436, 2737, 768, 502, 486], "748": [2347, 476, 628, 653, 2243, 2282, 920, 224, 3097, 706, 1607, 1342, 928, 569, 2384, 2638, 276, 1530, 1548], "6723": [2846, 1713, 2927, 861, 621, 2063, 920, 224, 810, 394, 2549, 2524, 2660, 1013, 1699, 83, 569, 2764, 276, 2645, 2424, 2501, 2737], "601": [2347, 1417, 1238, 2928, 473, 2928, 920, 224, 3097, 400, 1108, 3054, 803, 436, 768, 2424, 2737, 2409, 502, 2661], "7574": [1521, 1222, 2801, 861, 152, 1085, 920, 224, 3097, 400, 1075, 395, 3161, 2545, 1113, 1548], "6115": [1521, 3152, 593, 653, 1283, 48, 920, 224, 3097, 706, 1656, 739, 1968, 2479, 3061, 1762, 276, 2424, 768, 2737], "4292": [3048, 2465, 143, 861, 2124, 349, 920, 224, 810, 464, 2534, 2384, 1113, 3143, 2265, 2285], "6795": [89, 2060, 591, 2317, 1354, 861, 960, 1959, 861, 2567, 920, 1144, 1761, 760, 1607, 1764, 2737, 1013, 928, 569, 2764, 2362, 1245, 2424, 1530, 1028, 486, 2734], "8921": [1521, 2005, 386, 846, 673, 3164, 920, 224, 3097, 2510, 169, 139, 3051, 802, 3044, 751, 2661], "8869": [3040, 911, 29, 2323, 2897, 861, 920, 224, 3097, 706, 588, 2524, 2549, 257, 2660, 1013, 83, 2764, 1796, 2501, 2645, 1213, 1505], "7107": [1234, 3152, 936, 1835, 844, 653, 784, 349, 920, 1144, 1761, 760, 69, 569, 1876], "5735": [1449, 1079, 2192, 3084, 1022, 2928, 920, 1907, 1612, 2777, 2549, 2524, 1108, 2502, 83, 3054, 803, 2501, 2645, 436, 276, 802, 502, 486], "4978": [2248, 509, 1937, 715, 2928, 473, 846, 920, 224, 3097, 706, 1607, 1764, 2737, 1013, 928, 569, 2168, 2764, 608, 1530, 1245, 2914, 3044, 2153, 2424, 3057], "3343": [438, 378, 794, 653, 2668, 1649, 920, 224, 3097, 400, 2549, 2524, 2737, 257, 1505, 751, 83, 2168, 2501, 2645, 768, 2424, 2153, 2130], "2816": [194, 476, 1363, 861, 1751, 3116, 2814, 119, 1644, 1850, 928, 1147, 1530, 1548, 1028, 257, 2960, 2912, 3054, 569, 2362, 1525, 1607, 83, 139, 1796, 276, 448, 588, 2549, 2524, 2936, 2384, 2902, 2501, 436, 768, 1213, 3019], "6258": [3048, 2918, 2818, 846, 673, 48, 920, 224, 810, 3142, 569, 1113], "6225": [2248, 1191, 2212, 197, 861, 2484, 3164, 920, 224, 3097, 1997, 2549, 2524, 257, 2962, 83, 569, 2168, 608, 1608, 2501, 2153, 2130], "1889": [2069, 1222, 1036, 2323, 1963, 1649, 920, 224, 3097, 1889, 2549, 2524, 2502, 884, 83, 569, 2501, 276, 2645, 1548, 486], "7242": [1554, 476, 1902, 985, 2928, 497, 2063, 920, 224, 3097, 706, 1968, 3061, 635, 276, 2645, 3044, 2424, 2737, 2409, 2661], "4536": [1234, 3152, 2121, 653, 359, 3164, 920, 224, 3097, 400, 569, 2384], "3829": [2069, 1222, 781, 2323, 1768, 861, 920, 224, 3097, 706, 2534, 1147, 2384, 751, 440], "7505": [1234, 3152, 1901, 846, 2410, 2003, 2814, 119, 1644, 2208, 1195, 1606, 569, 2362, 802, 2424, 2737, 2734], "4968": [2352, 1713, 2121, 653, 48, 920, 1907, 1612, 2327, 1391, 2737, 1505, 2168, 859, 1570, 2424, 2153, 1147, 751, 440], "3458": [1521, 421, 838, 861, 2611, 3164, 920, 224, 810, 394, 1607, 1895, 1013, 1387, 928, 569, 3054, 2764, 635, 2656, 1530, 276, 436, 2424, 2737, 2178], "3335": [308, 949, 861, 152, 1085, 920, 224, 810, 1102, 1108, 3054, 2168, 803, 821, 436, 2153, 502], "895": [670, 2918, 2583, 2750, 653, 784, 48, 920, 1907, 1612, 2777, 440, 2168, 768, 2912, 1211], "2828": [308, 3152, 3020, 2928, 1661, 2928, 920, 224, 810, 2101, 2960, 139, 3054, 2902, 608, 436, 3019, 440], "5136": [670, 2060, 2, 1243, 861, 2484, 3164, 920, 224, 3097, 2510, 1656, 1764, 1505, 635, 569, 1362, 390, 318, 2645, 1245, 1113, 2265, 3143, 1525, 2184, 2285, 440], "187": [1234, 3152, 51, 1469, 861, 800, 2093, 2928, 1337, 920, 1907, 1612, 2327, 1656, 1387, 2936, 569, 2384, 2734, 2661], "6534": [1521, 3152, 2801, 653, 2044, 3084, 920, 224, 810, 2204, 1387, 139, 569, 2168, 2645, 2153, 763], "7818": [1550, 1417, 794, 653, 2668, 653, 920, 224, 3097, 400, 635, 1147, 1525], "1073": [1726, 1191, 2223, 861, 489, 3164, 920, 224, 2867, 1764, 139, 569, 608, 1245, 3057], "7493": [2605, 2465, 2, 653, 2668, 846, 920, 1907, 1612, 2327, 588, 2534, 257, 2384, 853, 2362, 1796, 2068, 1213], "7723": [1234, 3152, 1540, 861, 213, 1085, 920, 224, 3097, 706, 1656, 855, 569, 2384, 2362, 704, 1431, 1028, 1147, 2734], "8584": [1051, 166, 2121, 2108, 861, 2861, 846, 920, 1907, 1612, 2327, 139, 569, 2168, 608, 2362, 1431, 2153], "7861": [194, 1417, 1828, 561, 2928, 2198, 2282, 920, 224, 3097, 706, 1607, 928, 569, 276, 1530], "1859": [515, 1222, 2354, 861, 1974, 861, 920, 224, 3097, 400, 2549, 2524, 2936, 83, 2501, 2734, 2661], "617": [515, 165, 541, 861, 1955, 758, 2814, 119, 1644, 785, 2645, 2737, 1548, 1876, 929, 2960, 569, 162, 318, 2424, 69, 946, 2184, 751, 841, 3019, 1387, 83, 2168, 704, 1211, 350, 2549, 2524, 2936, 635, 1447, 2574, 2384, 608, 2724, 719, 2501, 768, 1147], "264": [2069, 2864, 143, 2928, 2485, 861, 920, 224, 3097, 1025, 1607, 1108, 2737, 928, 3054, 569, 2168, 803, 1530, 436, 2424, 802, 2153, 2645, 502], "2793": [2554, 3152, 1937, 2928, 2198, 2323, 920, 224, 3097, 706, 2709, 2936, 1342, 139, 2384, 2638, 2645, 2424, 2737, 2677], "3609": [3048, 166, 593, 861, 152, 3023, 920, 224, 3097, 1997, 1656, 1607, 928, 569, 2895, 3054, 2902, 276, 436, 1530, 1481, 440], "4827": [2858, 1618, 498, 148, 861, 2433, 3164, 920, 224, 3097, 705, 588, 257, 855, 2478, 704, 1796, 2424, 1431, 2737, 1213], "1114": [1051, 1079, 2140, 48, 2919, 920, 224, 810, 2201, 1895, 1013, 859, 1570, 2737, 1028, 1481, 1876, 257, 929, 3054, 569, 2764, 2362, 2656, 2424, 2409, 69, 1195, 704, 1796, 276, 763, 2178, 440, 588, 2902, 436, 3108, 1213], "7676": [1199, 509, 51, 263, 827, 653, 1346, 846, 1003, 920, 1907, 1612, 2327, 139, 802, 3044], "2579": [839, 3152, 846, 1139, 861, 920, 224, 810, 3142, 2549, 2524, 1195, 83, 2384, 2362, 276, 2501, 1147, 440], "6769": [1234, 3152, 3047, 103, 507, 653, 2322, 861, 290, 920, 1907, 1612, 2327, 2912, 635, 276, 2424, 2737, 1525], "1585": [3040, 2770, 1936, 2928, 1126, 2063, 920, 224, 810, 2250, 635, 139, 318, 1431, 2184], "6833": [1554, 2446, 653, 1304, 846, 920, 224, 3097, 400, 635, 569], "2212": [89, 911, 2223, 861, 2611, 3023, 920, 224, 2867, 2626, 966, 1013, 2764, 276, 2645, 2424, 2737, 946], "8214": [1948, 3152, 1053, 2323, 2070, 3023, 920, 224, 3097, 27, 1607, 1968, 635, 3061, 928, 569, 1530, 2424, 2737, 1147, 2661], "3680": [2665, 166, 499, 1931, 653, 784, 1085, 920, 224, 3097, 329, 2549, 2524, 83, 3051, 2501, 3044, 1147], "8313": [1521, 307, 2927, 427, 2928, 1659, 1085, 920, 224, 3097, 1889, 276, 2645, 2724, 1387], "4882": [1521, 1191, 2801, 1790, 861, 489, 846, 920, 224, 810, 2204, 1656, 1391, 2660, 2936, 569, 2384, 859, 608, 3112, 1570, 276, 2914, 1113, 1147, 440], "5224": [839, 509, 2801, 2251, 861, 2484, 2282, 920, 224, 3097, 400, 588, 1108, 257, 1213, 3054, 803, 1796, 436, 2424, 2737, 502], "2384": [3068, 1222, 2084, 2024, 861, 1546, 846, 920, 1907, 2185, 196, 588, 717, 1342, 569, 2735, 276, 2638, 2424, 768, 2737, 2677, 1505], "4349": [1951, 2770, 288, 846, 1881, 653, 920, 224, 810, 3142, 569, 257, 2362], "6806": [1640, 619, 964, 554, 2928, 473, 1649, 920, 224, 810, 464, 2737, 717, 635, 569, 2168, 608, 2735, 276, 2424, 2153, 751], "4572": [1951, 2770, 640, 2404, 2928, 1659, 356, 920, 224, 3097, 706, 1656, 1111, 569, 2645, 1147], "8138": [1951, 2770, 441, 2928, 1724, 2063, 920, 224, 3097, 400, 977, 1895, 1387, 139, 3054, 2902, 2656, 2501, 436, 2178], "5788": [2248, 911, 964, 1168, 861, 152, 2928, 920, 224, 3097, 706, 2661, 1147, 2362, 608, 2936], "61": [2858, 619, 1152, 861, 152, 48, 920, 224, 3097, 400, 569, 2645, 2709, 2737, 2424], "1183": [3048, 2464, 2908, 242, 2024, 861, 960, 861, 920, 1144, 1761, 760, 1074, 2549, 2524, 1391, 257, 2936, 83, 2384, 430, 2760, 1147, 440, 2501, 2900, 1157, 1525, 2661], "4695": [2347, 1222, 1622, 626, 2323, 2205, 846, 920, 1907, 1612, 2327, 1656, 1968, 3061, 855, 569, 704, 276, 1431, 2424, 2737], "7531": [1133, 509, 653, 1225, 3164, 920, 224, 3097, 2510, 2115, 2534, 1156, 257, 929, 1895, 2709, 1387, 139, 3054, 1689, 2178, 2384, 2656, 276, 436, 3044, 69, 1525, 2130], "6620": [839, 1535, 3077, 2958, 2323, 725, 846, 920, 224, 3097, 706, 1968, 1195, 1387, 3061, 2724, 276, 2645, 2424, 2737], "2978": [2858, 166, 1609, 1047, 2634, 653, 920, 224, 3097, 2510, 2077, 635, 2153, 2168, 318, 2645, 2424, 2737, 2677, 1525, 2184], "5001": [1051, 2918, 2928, 1659, 653, 920, 224, 3097, 2510], "5789": [2248, 2770, 1350, 798, 653, 784, 48, 920, 224, 3097, 329, 2549, 2524, 635, 83, 2501, 276, 768], "7842": [308, 3152, 861, 2484, 1085, 920, 224, 810, 464, 1074, 1656, 1223, 257, 1699, 569, 2384, 430, 2760, 286, 1431, 2335, 3057], "7738": [1951, 421, 2223, 2928, 2012, 861, 920, 224, 2867, 588, 257, 1796, 276, 2645, 1213, 1147], "136": [89, 911, 1053, 861, 184, 1649, 920, 1907, 2185, 2538, 1108, 1895, 2737, 2153, 1656, 1606, 929, 2960, 3054, 569, 2656, 1245, 2424, 69, 139, 2168, 803, 704, 502, 2178, 1764, 608, 436, 3019], "4181": [194, 2464, 1106, 653, 126, 861, 920, 224, 3097, 1291, 1801, 2660, 2936, 806, 2384, 276, 768, 2677, 465], "2376": [670, 166, 964, 653, 2243, 2063, 920, 224, 3097, 1997, 1108, 1013, 2645, 2737, 257, 2960, 3054, 2764, 802, 2424, 1213, 751, 139, 803, 1796, 276, 502, 588, 2902, 436, 768, 1295, 3019, 3057], "6491": [3040, 378, 2066, 861, 736, 861, 920, 1907, 1612, 2327, 2549, 1968, 2524, 3061, 635, 83, 569, 139, 608, 1839, 802, 2424, 2501, 2737, 1147, 1525, 2734], "6149": [2598, 226, 2903, 2323, 2766, 1649, 920, 224, 810, 394, 2061, 568, 1505], "8143": [308, 3152, 1902, 861, 2611, 3164, 920, 224, 810, 464, 1656, 1195, 1764, 569, 276, 2645, 768, 2424, 2737, 1245, 440], "7078": [2554, 378, 189, 846, 3164, 920, 224, 3097, 2510, 1108, 1895, 3054, 569, 803, 2656, 436, 3044, 502, 2178], "2350": [1199, 2918, 1381, 927, 507, 861, 960, 1339, 2063, 920, 1144, 1761, 760, 569, 768, 276, 1505], "3965": [1550, 1618, 861, 2484, 3164, 920, 224, 3097, 400, 928, 1147, 2645, 440], "7167": [2554, 166, 630, 653, 2668, 48, 920, 224, 3097, 400, 1074, 2912, 569, 430, 2760, 276, 1525, 440], "8854": [1550, 221, 1238, 2323, 725, 2323, 920, 224, 3097, 2510, 326, 1764, 139, 569, 2384, 1245, 2676], "6849": [2554, 378, 1867, 861, 621, 1649, 920, 224, 3097, 400, 2549, 1895, 3054, 569, 2656, 2362, 2501, 802, 2424, 436, 2737, 763, 2178], "3183": [438, 378, 51, 263, 403, 653, 181, 185, 2063, 1593, 920, 1907, 1612, 2327, 2549, 2524, 83, 569, 139, 1147, 112, 276, 2501, 2424, 3044, 2737, 598, 3099, 1525, 2661], "5258": [89, 509, 1381, 1988, 507, 861, 960, 1502, 48, 1731, 920, 1144, 1761, 760, 2549, 2524, 2936, 83, 569, 2384, 2501, 2645, 3044, 2424, 2737], "2764": [2069, 1618, 1081, 1807, 653, 2243, 48, 920, 224, 3097, 400, 1108, 928, 3054, 569, 2319, 2168, 803, 2384, 2645, 436, 2153, 1548, 502, 429, 946], "6812": [308, 3077, 653, 210, 861, 920, 224, 3097, 706, 1607, 588, 257, 928, 569, 1796, 802, 1530, 1213, 1147], "1380": [1521, 1191, 1053, 653, 106, 2282, 920, 1907, 1612, 2327, 635, 1147, 2645, 1387], "510": [1449, 2464, 1636, 653, 210, 48, 920, 224, 3097, 706, 2549, 2524, 83, 2362, 2501, 3044, 1028, 440], "2606": [2858, 216, 1152, 1454, 653, 359, 861, 920, 224, 3097, 400, 2534, 139, 569, 2168, 1912, 2384, 768, 2728, 1525, 440], "3371": [2846, 2446, 2644, 507, 846, 673, 1085, 920, 1144, 1761, 760, 2549, 2524, 139, 569, 83, 1912, 608, 2362, 3014, 2501, 1525], "1823": [308, 3152, 1095, 653, 784, 1047, 920, 1144, 1761, 760, 1195, 1387, 569, 2362, 2180, 763], "8288": [2665, 509, 496, 846, 759, 846, 920, 224, 810, 1369, 569, 3044, 440], "4231": [3068, 911, 2561, 861, 1709, 2063, 920, 224, 3097, 706, 1195, 1013, 111, 569, 2384, 2764, 859, 828, 2362, 1570, 802, 2424, 768, 2737, 1481], "132": [89, 2464, 964, 2157, 653, 54, 48, 920, 224, 810, 2201, 276, 821, 2362], "1104": [1133, 433, 29, 2714, 846, 1881, 2063, 920, 224, 3097, 1889, 2549, 2524, 1387, 2299, 83, 2724, 2501, 2336], "7644": [438, 226, 1081, 861, 420, 48, 920, 224, 3097, 706, 2549, 2524, 2936, 83, 2384, 2501, 1147, 440], "7163": [1640, 3152, 2334, 861, 420, 2003, 2814, 119, 451, 2568, 569, 2645, 608, 1147], "8717": [3048, 1191, 3047, 103, 507, 861, 960, 1874, 861, 290, 920, 1907, 2302, 896, 1656, 2960, 1447, 2362, 719, 3019, 841], "1320": [454, 911, 2223, 2149, 2928, 1785, 3023, 920, 224, 810, 2827, 1607, 2936, 928, 569, 2384, 2362, 1530, 1028], "5976": [2069, 2465, 2223, 653, 2243, 846, 920, 224, 3097, 2767, 1013, 2384, 2764], "6111": [2858, 1713, 134, 2759, 861, 44, 48, 920, 224, 810, 553, 635, 1147, 1525, 2912, 440], "3120": [1449, 1079, 964, 2928, 473, 48, 920, 224, 810, 464, 1656, 1968, 1108, 3061, 3054, 803, 2362, 276, 436, 2645, 502], "4941": [308, 3152, 1047, 2162, 2928, 920, 224, 3097, 2510, 2990, 2502, 635, 1231, 1113, 3044, 486], "4099": [194, 1222, 1936, 653, 1304, 1777, 2814, 119, 1644, 2208, 2479, 2962, 2153, 1599, 1762, 276, 1608, 2424, 2737, 1548, 2677, 465, 2228], "4546": [2554, 619, 2801, 2058, 653, 2243, 3084, 920, 224, 810, 2204, 139, 569, 802, 2645, 1147], "5222": [3040, 476, 1053, 2928, 461, 48, 920, 224, 3097, 1989, 1156, 929, 1689, 569, 276, 69], "8395": [1449, 1417, 787, 653, 2668, 846, 920, 224, 3097, 706], "5080": [1948, 1565, 1487, 861, 2484, 3084, 920, 1144, 1906, 646, 588, 1213, 1796, 257], "6275": [1133, 1417, 2346, 861, 2611, 1085, 920, 224, 810, 464, 2734, 1108, 1764, 1013, 3054, 569, 2764, 803, 2902, 1245, 802, 436, 502, 1028, 1147, 751], "5216": [1234, 3152, 964, 653, 1499, 1085, 920, 224, 3097, 2767, 1607, 588, 257, 2936, 928, 569, 2384, 2362, 1530, 3051, 1796, 3044, 2424, 2737, 1213, 1028], "8405": [3068, 2918, 2354, 861, 231, 48, 920, 1907, 1612, 2327, 569, 768, 276], "7003": [2846, 1713, 2928, 2485, 3164, 920, 224, 3097, 2510, 1108, 139, 3054, 803, 2362, 276, 436, 2424, 802, 2737, 502, 2734], "3639": [194, 1079, 964, 861, 152, 846, 920, 224, 3097, 706, 440, 276, 1147], "263": [2665, 166, 2941, 2323, 2527, 1085, 920, 224, 3097, 705, 1764, 2912, 139, 569, 2384, 859, 828, 3051, 1570, 1245, 3044, 276, 768, 2677, 1525], "9197": [1121, 433, 3122, 653, 1403, 2003, 920, 224, 810, 1428, 588, 257, 2153, 2168, 1796, 276, 2645, 802, 2424, 2737, 1213, 2677, 1147], "307": [438, 509, 2066, 1926, 846, 45, 3164, 920, 224, 3097, 2510, 3044], "1188": [1550, 221, 629, 846, 648, 2063, 920, 224, 3097, 1997, 2661, 1391, 2936, 2384, 2362, 2409, 1147, 440], "6748": [1640, 3152, 948, 861, 2484, 1047, 920, 224, 810, 3142, 1699, 569, 608, 276, 2645, 946, 3057, 440], "4246": [2858, 2465, 2440, 861, 44, 48, 920, 224, 3097, 1989, 2153, 2168, 2709, 2362], "3835": [438, 2918, 109, 656, 861, 960, 1649, 920, 224, 3097, 329, 2990, 588, 257, 1342, 928, 1231, 2362, 1796, 2638, 1113, 1213, 1505], "7592": [1234, 3152, 2354, 846, 673, 48, 920, 224, 3097, 1989, 1420, 2409, 2136, 569], "5807": [3040, 1713, 1902, 154, 861, 152, 48, 920, 224, 3097, 1132, 2549, 2524, 83, 318, 2645, 1608, 2501, 2184], "2178": [1234, 3152, 2928, 1661, 1085, 920, 224, 3097, 1989, 2534, 929, 635, 69, 569, 2384, 2643, 704, 3051, 440, 2645, 2723, 3044, 2409, 1147, 3057, 2661], "7960": [308, 2121, 846, 1340, 3164, 920, 1907, 2185, 1043, 1993, 1587, 569, 2384, 276, 3088], "2280": [438, 911, 2121, 861, 44, 2063, 920, 1907, 1612, 2327, 2661, 1391, 635, 276, 2645, 2409, 1147, 440], "2820": [2069, 378, 3077, 653, 2668, 1649, 920, 224, 3097, 400, 1656, 2549, 2524, 588, 1764, 257, 1013, 83, 569, 2764, 1796, 276, 2645, 1245, 2424, 2737, 2501, 1213], "6503": [3048, 1618, 2256, 3109, 861, 960, 2472, 3164, 2143, 920, 1144, 1761, 760, 1656, 257, 1895, 139, 3054, 2061, 2178, 859, 828, 2656, 2362, 1570, 436, 2130], "7624": [454, 2770, 2928, 1126, 1777, 2814, 119, 1644, 1370, 2534, 569, 2384, 1113, 3044, 1147, 440], "594": [2598, 1618, 2281, 2323, 2766, 653, 920, 224, 810, 2204, 1391, 569, 2168, 2153, 1147, 440], "1847": [1726, 476, 2440, 2024, 653, 126, 2323, 920, 224, 3097, 2510, 1656, 1108, 1387, 3054, 803, 436, 2914, 502], "973": [515, 3152, 60, 2251, 861, 152, 861, 920, 224, 3097, 400, 1656, 1012, 1453, 569, 1471, 836, 2384, 1113, 666, 2265, 3143, 1147, 1532, 1961, 2285], "5745": [1051, 166, 2494, 2065, 888, 507, 976, 1034, 653, 2322, 1179, 770, 861, 850, 969, 2218, 920, 1144, 1761, 760, 1525], "2728": [3040, 378, 2085, 798, 2928, 2738, 846, 920, 1144, 1761, 760, 2549, 2524, 588, 257, 1387, 83, 2724, 1796, 2501, 2645, 1548, 1213, 751], "4454": [3040, 2465, 3167, 653, 1539, 2919, 2814, 119, 451, 957, 1391, 2912, 2015, 635, 569, 2409, 1839, 276, 2424, 440, 2737, 1548, 1147, 1525, 3057, 2661], "8599": [2846, 307, 794, 653, 59, 1649, 920, 224, 810, 18, 1968, 2479, 3061, 1362, 1762, 2645, 2424, 2737, 390], "5533": [1951, 3152, 2346, 653, 2243, 2282, 920, 224, 810, 1102, 588, 2524, 2549, 257, 1548, 83, 1796, 276, 2645, 2501, 2409, 1213, 751], "5731": [839, 619, 2066, 653, 784, 1085, 920, 1907, 1612, 2327, 2549, 2524, 83, 2823, 3051, 2501, 3044, 1548, 1028], "4638": [2069, 509, 864, 1047, 36, 48, 920, 1907, 1612, 795, 1391, 569, 276, 1147, 1525, 440], "4741": [515, 221, 1540, 861, 213, 2063, 920, 224, 810, 1428, 1607, 1656, 2153, 928, 569, 1599, 2362, 276, 1530, 2228, 1028, 1147], "4568": [3068, 509, 2223, 861, 213, 2003, 2814, 119, 451, 1134, 1968, 1108, 1764, 2479, 3061, 1387, 3054, 569, 803, 2724, 1762, 276, 2645, 1245, 2424, 2737, 802, 502, 436, 763], "5600": [454, 1222, 5, 847, 844, 861, 960, 1849, 48, 920, 1144, 1761, 760, 1656, 1895, 139, 3054, 569, 2168, 2656, 436, 2153, 2178], "7841": [1550, 911, 1602, 2928, 473, 3164, 920, 224, 810, 1102, 2660, 1362, 276, 2424, 2737, 3057, 390], "4306": [2069, 1417, 2927, 653, 2243, 757, 920, 224, 3097, 400, 2549, 2524, 1387, 83, 2724, 2501, 2645, 2424, 2737], "5550": [438, 1191, 1636, 1392, 861, 152, 2063, 920, 224, 3097, 400, 635, 1195, 3044, 440], "3627": [89, 2464, 1540, 2928, 1126, 3164, 920, 224, 810, 2204, 1656, 929, 139, 2384, 1147, 2645, 69], "7646": [1550, 911, 868, 861, 152, 48, 920, 224, 3097, 400, 2549, 2524, 83, 3054, 2384, 569, 2501, 436], "5043": [308, 3152, 74, 653, 784, 1174, 920, 224, 810, 3142, 3161, 440, 1147, 1028, 2362], "1911": [1121, 2770, 2323, 1963, 48, 920, 224, 810, 2204, 1656, 635, 2645, 1387], "323": [839, 509, 861, 2484, 2928, 920, 224, 3097, 2510, 1656, 2936, 635, 3143, 2265, 2661], "5399": [2248, 2060, 1129, 2928, 1659, 2323, 920, 224, 3097, 706, 569, 286], "2083": [2846, 619, 1540, 861, 213, 757, 920, 224, 810, 2204, 588, 2524, 2549, 257, 83, 1796, 2501, 2424, 2737, 1213], "8392": [1133, 1222, 2334, 861, 152, 2282, 920, 224, 810, 1369, 2384, 2362], "6218": [1951, 1565, 794, 861, 152, 48, 920, 224, 3097, 400, 2479, 1362, 1608, 2645, 2737, 2153, 1876, 569, 390, 802, 2424, 3044, 69, 2534, 2709, 2962, 1856, 2168, 440, 2384, 1762, 2771], "3553": [1521, 1191, 2006, 861, 2484, 1085, 920, 224, 3097, 1997, 1895, 3061, 928, 1362, 2645, 2737, 257, 569, 3054, 2656, 2362, 1245, 2424, 802, 751, 1387, 1796, 276, 2178, 588, 1968, 1764, 635, 2724, 436, 1213, 1147, 390], "5921": [2858, 911, 357, 846, 1389, 1085, 920, 1907, 2185, 1043, 139], "2023": [194, 1191, 1219, 846, 759, 1649, 920, 224, 3097, 1001, 1656, 635, 139, 569, 2424, 768, 2737, 751], "7796": [308, 3152, 1636, 2994, 2928, 1659, 2928, 920, 224, 3097, 706, 584, 3044, 1228], "1631": [308, 3152, 1798, 1657, 2928, 1661, 2063, 920, 224, 3097, 706, 2534, 2384, 751, 1387], "526": [515, 1696, 930, 653, 2243, 1649, 920, 224, 3097, 706, 588, 2524, 2549, 257, 83, 928, 2362, 1796, 2501, 1213, 1028, 1147], "34": [1948, 3152, 1867, 1047, 2452, 846, 920, 224, 3097, 400, 2710, 257, 2168, 2629, 2362, 2153, 2130], "2827": [1726, 2770, 1902, 2462, 861, 213, 1649, 920, 224, 3097, 1889, 1764, 2479, 2936, 635, 569, 2384, 1762, 276, 1245, 2424, 2737, 1548, 3088, 1147, 3057], "637": [515, 221, 630, 2717, 653, 2668, 861, 920, 224, 3097, 400, 1656, 2936, 569, 2384, 2645, 2424, 2737], "6643": [3068, 911, 333, 861, 150, 2330, 2814, 119, 1644, 2753, 588, 86, 1764, 257, 2709, 1342, 24, 928, 569, 1362, 601, 1796, 2638, 2645, 1245, 3044, 821, 1213, 2677, 390], "9005": [1521, 3152, 2052, 2928, 473, 3164, 920, 224, 3097, 400, 1108, 3054, 1362, 2168, 803, 436, 768, 2153, 502, 1481, 390], "5810": [1051, 509, 1152, 2928, 1659, 653, 920, 224, 3097, 400, 768, 1525, 2723, 2912, 996], "7779": [1234, 3152, 653, 1403, 653, 920, 224, 810, 464, 1656, 2524, 2549, 83, 569, 2362, 2501, 2645, 802, 1028], "1195": [2069, 2446, 1081, 653, 2243, 3164, 920, 224, 3097, 706, 588, 1607, 717, 257, 928, 569, 1796, 2735, 1530, 1213, 3088], "5384": [3040, 1191, 2121, 653, 1569, 3164, 920, 1907, 1612, 2327, 588, 257, 569, 2362, 1796, 2645, 1113, 1213, 751], "3696": [2665, 509, 2927, 1429, 861, 1746, 1085, 920, 224, 3097, 1889, 588, 1195, 1391, 257, 2936, 569, 2384, 859, 2362, 1570, 1796, 2424, 768, 2737, 1213, 1147, 440], "539": [839, 2864, 2928, 892, 48, 920, 224, 3097, 400, 635, 704, 855, 1431, 751], "4169": [515, 1222, 1883, 3010, 653, 2103, 846, 920, 224, 3097, 400, 2936, 2384, 276, 3044, 2424, 2737], "6857": [1521, 1222, 1301, 846, 673, 846, 920, 1907, 1612, 2327, 1195, 569, 2384, 2362, 1762, 1113], "2193": [3068, 1222, 2052, 653, 2243, 1085, 920, 224, 3097, 400, 2912, 2936, 139, 2384, 2362, 276, 3044, 1028, 1525, 3057], "2952": [839, 619, 794, 846, 759, 48, 920, 224, 2867, 1656, 1108, 3054, 803, 3014, 436, 502, 2734], "8539": [1051, 1417, 2223, 846, 1881, 2003, 920, 224, 810, 2109, 859, 828, 1228, 853, 1570, 2459, 2265, 1481, 1876, 1656, 257, 569, 162, 2362, 1113, 3044, 1525, 2130, 276, 440, 3143, 1147], "5770": [1550, 911, 2927, 2928, 461, 1085, 920, 224, 3097, 706, 1968, 1075, 1895, 3061, 3054, 2061, 2656, 276, 436, 2424, 2737, 2409, 2178, 2661], "1868": [2598, 221, 29, 2018, 861, 2484, 3164, 920, 224, 3097, 1291, 635, 2409, 1195, 569, 2661], "8941": [1726, 1222, 964, 513, 846, 3103, 861, 920, 224, 3097, 706, 1391, 2912, 2362, 440, 2409, 1147, 1525, 2661], "1124": [2069, 433, 947, 861, 2484, 3164, 920, 224, 3097, 329, 1195, 1108, 2912, 3054, 569, 855, 803, 2362, 704, 436, 1431, 2424, 2737, 502, 69, 1525, 1876], "2250": [3068, 226, 861, 2845, 1281, 2814, 119, 1644, 2753, 1342, 569, 2638, 768, 2424, 2737], "2370": [1951, 2770, 2392, 2323, 676, 3084, 920, 224, 3097, 706, 276, 1147], "8456": [1449, 1417, 1636, 846, 3103, 48, 920, 224, 3097, 706, 276, 2709, 440], "2875": [2248, 2446, 1636, 2448, 846, 759, 48, 920, 224, 810, 394], "925": [1051, 2005, 1492, 1348, 2928, 973, 861, 920, 1144, 1761, 760, 2549, 2524, 2734, 83, 276, 2645, 2424, 2501, 2737, 1295, 3057, 751], "4325": [308, 653, 1225, 48, 920, 224, 810, 1161, 1764, 1013, 139, 569, 2764, 2362, 1245, 768, 1505], "2797": [1726, 2446, 1540, 653, 2668, 2003, 920, 224, 810, 18, 1656, 588, 257, 929, 139, 569, 2168, 608, 2362, 704, 1796, 802, 2153, 1213, 69, 3057], "3154": [839, 1417, 3059, 861, 213, 2282, 2814, 119, 1644, 2753, 588, 2549, 2524, 257, 83, 569, 139, 2362, 1796, 276, 2501, 1213, 1525, 2130], "8320": [1449, 216, 2928, 2351, 861, 920, 224, 3097, 2510, 2549, 2524, 635, 83, 139, 2501, 802, 2645, 2424, 2737, 2409, 465, 2661], "5140": [89, 1417, 1540, 861, 213, 3164, 920, 224, 810, 602, 650, 2962, 2617, 569, 1562, 1608, 276, 1113, 3143, 2265, 1548, 763, 2285], "1726": [2069, 378, 1540, 2457, 861, 2845, 1085, 920, 224, 810, 2204, 2549, 2524, 2936, 83, 2384, 2501, 821, 2645, 2914, 751], "1457": [1521, 307, 180, 2323, 3164, 920, 224, 3097, 706, 1108, 840, 569, 276, 821, 1548, 598, 1525, 1505], "2243": [2069, 2918, 838, 653, 1499, 1174, 2814, 119, 451, 1134, 1108, 1895, 1013, 1645, 928, 2578, 859, 853, 1570, 2645, 157, 2153, 2737, 1597, 1505, 2661, 1656, 257, 929, 2912, 3054, 569, 2764, 2656, 112, 1245, 802, 2424, 1213, 69, 1525, 751, 2534, 1387, 83, 954, 2168, 803, 704, 1796, 276, 502, 2178, 588, 2524, 2549, 3099, 1764, 1662, 635, 2384, 2902, 2724, 2501, 436, 768, 1295, 1147, 3057], "139": [194, 216, 1309, 861, 155, 48, 920, 1907, 1612, 2327, 2990, 717, 2660, 1342, 569, 1231, 1599, 2168, 2362, 2735, 3004, 802, 1113, 2638, 2153, 2228, 1260], "7803": [1234, 3152, 3033, 846, 2987, 1085, 920, 224, 3097, 400, 1662, 966, 1108, 2912, 1342, 502, 635, 3054, 569, 822, 803, 2638, 276, 2645, 436, 1548, 2728, 2677, 1525], "9340": [1199, 509, 1909, 846, 2176, 758, 2814, 119, 1644, 1147, 569, 2936], "3789": [1234, 3152, 2223, 846, 2596, 1085, 920, 224, 3097, 706, 1075, 635, 855, 2061, 2362, 704, 2424, 1431, 2737, 3057], "3027": [308, 3152, 1301, 846, 3103, 1649, 920, 224, 3097, 1997, 3054, 1362, 2902, 436, 2645, 390], "876": [1449, 1535, 838, 653, 1539, 1649, 920, 224, 810, 1369, 2549, 2524, 1607, 2737, 83, 928, 569, 2501, 276, 2424, 1530, 1147, 1505], "2246": [2598, 2060, 2, 3084, 2063, 920, 224, 3097, 1997, 2962, 2728, 1608, 2501, 751], "7234": [308, 964, 861, 2667, 1649, 920, 224, 3097, 706, 318, 276, 2645, 2424, 2737, 1147, 2184], "566": [2248, 2446, 653, 210, 653, 920, 224, 810, 3030, 1391, 2912, 1645, 69, 139, 855, 2061, 704, 2075, 318, 2983, 1431, 1147, 1525, 2184, 440], "8787": [1521, 1191, 628, 2928, 131, 1085, 920, 224, 810, 394, 1968, 2479, 635, 1013, 3061, 2764, 1762, 2645, 2424, 2737], "5322": [1951, 3152, 180, 2928, 2485, 1649, 920, 224, 810, 553, 1525, 2912], "7181": [2846, 2446, 2801, 2058, 861, 621, 48, 920, 224, 810, 464, 2549, 2524, 1391, 928, 83, 2501, 2645, 2424, 3044, 2737, 1147, 1509, 440], "5171": [670, 1079, 1602, 1894, 861, 2611, 2063, 920, 224, 3097, 706, 1656, 1764, 569, 704, 276, 1245, 768, 2424, 2737, 2645, 1525], "1824": [3068, 1191, 2066, 1700, 2928, 1410, 653, 920, 1907, 1612, 2327, 1548, 139, 2645, 2424, 2737, 2409], "3704": [2846, 2918, 2831, 3084, 2022, 1649, 920, 224, 810, 1161, 1105, 2962, 139, 276, 2728, 2677, 1147, 440], "6730": [1449, 166, 1219, 1388, 861, 1974, 3164, 920, 224, 3097, 1001, 139, 569, 802], "1470": [2069, 1417, 2223, 861, 621, 861, 920, 224, 3097, 1889, 1013, 2764], "2570": [2069, 1222, 1636, 653, 2243, 846, 920, 224, 3097, 706, 717, 2502, 139, 569, 2735, 276, 486], "1627": [1948, 3152, 51, 1451, 1469, 2928, 813, 599, 48, 418, 920, 1907, 1612, 2327, 569, 2384, 1113, 2362], "740": [2352, 2864, 2223, 653, 1403, 2003, 920, 224, 810, 2201, 588, 2734, 257, 1213, 751, 2362, 1796, 2424, 2737, 1295, 1028, 3057], "7367": [2605, 509, 949, 2296, 653, 54, 2063, 920, 224, 810, 2204, 2549, 2524, 1607, 83, 928, 569, 2501, 768, 1530, 1295, 3057, 440], "3461": [1640, 3152, 516, 653, 359, 349, 920, 224, 810, 2408, 2813, 2983], "3305": [454, 1079, 322, 3125, 2928, 1659, 1649, 920, 224, 3097, 400, 855, 2168, 2362, 704, 1431, 2153], "3780": [1051, 911, 1636, 1047, 555, 1649, 920, 224, 3097, 706, 1656, 966, 1606, 276, 2424, 2737], "4559": [1521, 3152, 2801, 2868, 653, 1304, 2063, 920, 224, 3097, 1889, 1108, 2645, 2737, 2265, 2153, 2285, 2912, 3054, 569, 2362, 1113, 2424, 1525, 751, 1387, 2168, 803, 276, 502, 966, 635, 821, 436, 3143], "9196": [2069, 1618, 2481, 861, 231, 861, 920, 1907, 1612, 2327, 1028, 1147, 2737, 2424, 2362], "625": [1640, 1191, 3102, 2928, 2485, 48, 920, 224, 3097, 329, 1074, 2660, 430, 2362, 2760, 2645, 1028, 1147, 2734], "6261": [2846, 2142, 2029, 846, 759, 2282, 920, 1907, 1612, 2777, 1108, 2912, 139, 3054, 2902, 803, 276, 436, 502, 1525], "4887": [2858, 1535, 1036, 1177, 861, 1974, 1085, 920, 224, 3097, 1997, 2549, 2524, 83, 3054, 569, 2168, 803, 2362, 1147, 2501, 436, 3044, 2153, 502, 1028, 2335, 2734], "4734": [670, 1222, 1636, 653, 2243, 861, 920, 224, 3097, 706, 257, 2960, 1895, 2660, 3054, 569, 2168, 2362, 2656, 436, 2153, 3019, 2178], "2065": [2069, 2918, 189, 235, 861, 960, 2928, 920, 224, 3097, 2510, 1762, 569], "4735": [454, 2465, 496, 846, 759, 1649, 920, 224, 810, 2204, 3057, 276, 3044, 1505], "5886": [2248, 221, 1798, 861, 1974, 3164, 920, 224, 3097, 706, 2549, 2524, 635, 83, 569, 139, 1341, 2501, 802, 1028, 1147], "4200": [2352, 476, 2818, 861, 420, 1649, 920, 224, 810, 2204, 2661, 635, 2384, 2362, 2409, 3044, 1548, 1147, 440], "7826": [454, 2465, 580, 1187, 861, 152, 2063, 920, 224, 810, 8, 2549, 2524, 635, 83, 276, 2501], "7918": [1521, 307, 1540, 1014, 861, 489, 2282, 920, 224, 3097, 2642, 2549, 2524, 2936, 83, 569, 2384, 2362, 2501, 1028, 1147, 2734], "8550": [2347, 2465, 653, 210, 48, 920, 224, 810, 2204, 1895, 2912, 3054, 569, 318, 802, 3044, 1431, 598, 1525, 2184, 139, 855, 704, 2936, 2384, 2902, 608, 436, 768, 1295, 1147, 3057], "4468": [1133, 1618, 1053, 861, 1842, 846, 920, 224, 3097, 706, 1656, 2709, 855, 2168, 318, 821, 2153, 2184], "5003": [515, 1943, 2223, 1865, 653, 1304, 1085, 920, 224, 810, 1927, 588, 257, 2960, 929, 69, 704, 1796, 276, 2424, 2737, 1213, 3019, 2734], "7824": [438, 1943, 1540, 1423, 861, 468, 2063, 920, 224, 810, 918, 739, 1108, 1146, 2912, 502, 3054, 569, 803, 436, 2914, 598, 1028, 1147, 1525, 751], "7697": [1199, 294, 472, 846, 2589, 2063, 920, 224, 393, 877, 2936, 1013, 2384, 2764, 2362, 276, 1028], "9142": [3068, 2465, 964, 2887, 861, 152, 1085, 920, 224, 3097, 706, 718, 2335, 395, 3108, 2362, 2265, 3161, 3104, 276, 1113, 2424, 2737, 768, 3143, 946, 1668, 2285, 1876], "119": [1726, 1417, 29, 2448, 2323, 2658, 1649, 920, 224, 810, 464, 2677, 569, 2384, 763], "2933": [2605, 2918, 955, 653, 1403, 3164, 920, 224, 3097, 706, 588, 635, 1796, 2645, 1548, 1213], "226": [2069, 2446, 29, 985, 861, 2484, 3023, 920, 224, 3097, 400, 1656, 2549, 1075, 2524, 2734, 83, 2456, 2061, 859, 828, 1570, 2501, 2424, 2737, 429, 1028, 1147, 1525, 751], "9151": [1234, 3152, 1830, 861, 1621, 1085, 920, 224, 3097, 400, 1108, 2737, 3054, 2168, 803, 2362, 276, 436, 2424, 768, 2153, 802, 502], "9153": [839, 2446, 374, 2323, 861, 920, 224, 810, 1614, 257, 569, 2645, 2914, 1147, 2130, 440], "6486": [1051, 433, 846, 759, 1649, 920, 224, 810, 553, 2990, 1231, 2645, 2737, 2728, 257, 2960, 2912, 2098, 2274, 569, 738, 286, 1113, 2424, 576, 1525, 1150, 2534, 139, 1796, 276, 588, 2273, 2617, 2384, 2545, 1213, 3088, 3019], "4684": [308, 3152, 1902, 1894, 861, 2611, 3164, 920, 224, 810, 464, 1656, 1607, 588, 257, 1387, 928, 569, 2724, 1796, 2645, 1530, 1213, 1028, 1147], "6140": [1051, 1417, 967, 861, 231, 1649, 920, 1907, 2185, 506, 929, 2960, 1447, 69, 719, 3019, 841], "4775": [2605, 2465, 964, 861, 152, 2063, 920, 224, 3097, 706, 635, 1699, 2409, 2645, 2661], "3365": [2554, 2465, 1636, 2615, 861, 152, 3164, 920, 224, 3097, 2767, 139, 2645], "3148": [1051, 684, 838, 2698, 861, 425, 1281, 2814, 119, 1644, 2208, 276, 2384, 2936], "6894": [89, 2770, 3022, 861, 2555, 846, 920, 224, 810, 1031, 1656, 2549, 2524, 1895, 83, 3054, 859, 828, 2362, 1147, 1570, 2501, 802, 436, 1028, 2367, 2178], "7442": [308, 79, 2928, 473, 757, 920, 224, 810, 394, 1074, 635, 2153, 2168, 430, 2760, 2409, 276, 2424, 2737, 1548, 2677, 2661], "8622": [2554, 2005, 861, 1621, 861, 920, 224, 3097, 400, 1391, 2660, 1342, 635, 928, 3054, 2168, 2902, 1509, 1147, 2638, 436, 2153, 69, 1493, 440], "7791": [1951, 165, 334, 861, 213, 2063, 920, 224, 3097, 1025, 2549, 2524, 1764, 83, 569, 318, 276, 1245, 2501, 2184], "4925": [1234, 3152, 2024, 2323, 2205, 1047, 920, 1144, 1761, 760, 588, 257, 139, 569, 1796, 802, 1213, 751], "8289": [2598, 2465, 2256, 2108, 861, 736, 48, 2008, 920, 1144, 1761, 760, 1391, 1158, 1599, 822, 383, 1608, 2153, 2265, 2728, 2341, 486, 2285, 2661, 1432, 569, 2362, 318, 1431, 1113, 3044, 2409, 2184, 1292, 2216, 2962, 1598, 3161, 2228, 440, 3050, 2502, 2936, 635, 395, 2384, 608, 821, 768, 3143, 3108, 607, 1147], "6917": [454, 476, 1036, 653, 2243, 48, 920, 224, 3097, 706, 1108, 2645, 2737, 257, 3054, 569, 318, 1245, 802, 2424, 1525, 2184, 751, 139, 803, 1796, 276, 502, 588, 1764, 436, 1213], "1362": [438, 421, 2082, 861, 2484, 846, 920, 224, 810, 3030, 139, 802, 2734, 2362], "3693": [3048, 226, 1540, 2934, 861, 2484, 2063, 920, 224, 3097, 706, 1656, 2732, 1606, 1843, 569, 1362, 3114, 1856, 2362, 855, 276, 2645, 2424, 2737, 1295, 1854, 2367, 1525, 2679, 390], "8582": [454, 2918, 1081, 846, 2410, 2928, 920, 224, 3097, 706, 588, 1213, 1796, 257, 3044], "4476": [1234, 3152, 2687, 792, 861, 1866, 653, 920, 1144, 1761, 760, 739, 569, 1525, 1431, 2912], "1723": [1199, 3152, 3047, 660, 507, 653, 2853, 1085, 920, 1907, 2302, 896, 569, 3044], "4883": [839, 433, 2957, 861, 2484, 861, 920, 224, 810, 553, 3054, 436, 2902, 608], "5818": [1133, 911, 2334, 861, 213, 2003, 920, 224, 3097, 1889, 2960, 2660, 635, 2168, 276, 821, 2153, 3019, 751], "3922": [3048, 1191, 2223, 653, 1499, 1085, 920, 224, 810, 1102, 2350, 1895, 1387, 635, 2574, 3054, 162, 2178, 2724, 2656, 3092, 276, 2645, 2424, 1431, 2737, 1548, 436, 768, 1745, 440], "6294": [308, 2346, 861, 2611, 1649, 920, 224, 3097, 706, 588, 1656, 257, 1796, 276, 2645, 1213, 2677], "4109": [308, 3152, 2928, 2485, 653, 920, 224, 3097, 2510, 1570, 569, 2362, 859, 1147], "7866": [2352, 1713, 143, 653, 210, 846, 920, 224, 3097, 1889, 1391, 1895, 751, 3054, 569, 2656, 436, 2424, 2737, 1147, 2178, 440], "6382": [194, 1079, 1274, 2698, 861, 2845, 3023, 920, 224, 3097, 1889, 2549, 2524, 1108, 83, 3054, 803, 2501, 276, 2645, 2424, 2737, 436, 502], "2785": [1726, 2465, 1937, 2928, 2198, 2063, 920, 224, 3097, 706, 1108, 2015, 3054, 803, 1839, 436, 276, 1431, 502], "5683": [839, 509, 964, 2323, 2070, 1649, 920, 224, 3097, 706, 588, 1607, 2737, 257, 1013, 928, 569, 2764, 1796, 318, 276, 2424, 1530, 1213, 2184, 751], "4528": [308, 964, 2757, 861, 468, 653, 920, 224, 3097, 1889, 2549, 2524, 1391, 2936, 83, 2384, 2501, 1147, 1525, 440], "995": [1449, 378, 2192, 1463, 2928, 2899, 1047, 920, 224, 810, 2408, 1108, 3054, 803, 802, 436, 2645, 502], "7547": [2605, 2918, 2851, 846, 3103, 1777, 920, 224, 3097, 2642, 1108, 1387, 635, 2936, 3054, 803, 436, 2424, 2737, 502, 1028, 1147], "4389": [1726, 2770, 2121, 653, 126, 2063, 920, 1907, 1612, 2327, 1993, 928, 569, 3044], "4979": [1726, 1417, 1636, 653, 54, 1649, 920, 224, 3097, 400, 1656, 1764, 929, 1013, 569, 2764, 704, 318, 1245, 1295, 69, 2184], "5353": [1948, 3152, 2937, 349, 846, 920, 1907, 2185, 2986, 2384, 2362, 802, 2936], "2072": [2554, 165, 2595, 653, 359, 861, 920, 224, 3097, 2510, 2549, 2524, 1195, 83, 569, 859, 2362, 1570, 2501, 751], "4335": [1951, 165, 1636, 653, 2668, 1047, 920, 224, 3097, 400, 1656, 719, 1447, 768, 841], "4956": [454, 509, 2851, 653, 1304, 2063, 920, 224, 810, 464, 1656, 966, 929, 139, 569, 1113, 69], "9488": [670, 2770, 794, 3084, 731, 846, 920, 224, 810, 2204, 2549, 2524, 2502, 2479, 83, 569, 608, 1762, 2501, 276, 2424, 2737, 3057, 486, 2734], "979": [1199, 1535, 917, 2928, 2351, 349, 920, 224, 3097, 2510, 1559, 276, 763, 2471], "5849": [1449, 2465, 2281, 2171, 861, 152, 3164, 920, 224, 810, 464, 2549, 2732, 1895, 3054, 569, 2656, 2501, 436, 3044, 1854, 2178], "5326": [515, 1222, 846, 3103, 3023, 2814, 119, 1644, 2208, 2728, 569, 2384], "4621": [89, 421, 794, 653, 1093, 846, 920, 224, 810, 2204, 1607, 257, 2130, 928, 569, 2362, 1530, 2645, 2424, 2737, 1028, 751], "9370": [308, 3152, 1011, 2562, 846, 673, 2063, 920, 224, 810, 1614, 2534, 169, 929, 569, 2384, 608, 69, 2335, 440], "3432": [2846, 2060, 964, 154, 653, 2243, 757, 920, 224, 3097, 2642, 1656, 739, 1195, 257, 2335, 2936, 2130, 569, 2384, 2362, 1147, 276, 3044, 2341, 2677, 946, 751, 440], "7336": [1726, 216, 2281, 861, 213, 3164, 920, 224, 810, 1102, 1195, 1794, 1691, 635, 569, 3108, 2362, 2409, 276, 2424, 2737, 1548, 2341, 3057, 946, 1627], "2283": [1550, 1417, 964, 2323, 1734, 2282, 920, 224, 3097, 706, 588, 257, 2362, 1796, 276, 2424, 2737, 1213, 1028], "73": [3048, 2446, 1883, 1047, 456, 861, 920, 224, 3097, 400, 1656, 2936, 2962, 569, 2384, 1608, 276, 821, 2409, 2661], "366": [1121, 2465, 1232, 861, 468, 2063, 920, 224, 810, 3142, 2549, 2524, 1606, 1895, 2936, 1699, 83, 3054, 635, 2178, 2384, 2656, 2501, 436, 2424, 768, 2737, 1147, 751], "4218": [89, 216, 1274, 2928, 473, 2282, 920, 224, 810, 394, 2936, 635, 139, 569, 1912, 802, 2424, 2737, 1525, 2661], "838": [839, 1713, 3091, 674, 653, 2243, 1085, 920, 224, 810, 2101, 326, 1108, 383, 346, 3051, 901, 2914, 1548, 2676, 2728, 2661, 1656, 257, 3054, 569, 1912, 2362, 318, 802, 2409, 1525, 2184, 751, 1195, 1387, 139, 803, 3161, 1839, 502, 2936, 635, 395, 2902, 436, 768, 1147, 2734], "1657": [3048, 911, 917, 2120, 653, 856, 48, 920, 224, 3097, 329, 588, 1993, 326, 257, 929, 91, 2015, 1213, 928, 569, 855, 1147, 704, 1796, 1839, 1431, 2676, 69, 1525], "8250": [2069, 2770, 955, 653, 1093, 3045, 2814, 119, 451, 124, 588, 257, 2362, 1796, 276, 1548, 1213, 1028, 1525, 2734], "8872": [1121, 619, 2927, 861, 213, 757, 920, 224, 3097, 706, 2479, 569, 2362, 1762, 2424, 2737, 1028, 1147, 440], "4364": [1521, 1943, 2440, 2715, 653, 2668, 2323, 920, 224, 3097, 400, 2549, 2524, 1656, 83, 569, 2362, 2501, 2645, 802, 1147], "8735": [839, 1417, 2203, 2323, 1504, 3164, 920, 224, 2798, 2064, 1108, 1013, 928, 2645, 2737, 2153, 257, 569, 3054, 2764, 3044, 2424, 83, 2168, 803, 1796, 276, 502, 440, 2549, 2524, 588, 635, 2902, 608, 2501, 436, 768, 1213, 1147, 3057], "1189": [2665, 1417, 630, 512, 861, 489, 1085, 920, 224, 3097, 1997, 1895, 1645, 2914, 486, 2661, 257, 2912, 929, 3054, 569, 2656, 318, 1245, 802, 3044, 2409, 69, 1525, 2184, 2130, 2612, 139, 83, 2278, 1796, 276, 763, 2178, 588, 2524, 2549, 1764, 2502, 2902, 2501, 436, 768, 821, 1213], "7330": [1133, 619, 630, 2571, 653, 1225, 3164, 920, 224, 3097, 706, 1342, 569, 2362, 2638, 2424, 2737, 1028, 763, 1505], "8124": [839, 1191, 542, 3101, 861, 425, 1085, 920, 224, 3097, 1491, 1195, 1764, 2912, 1606, 1013, 569, 2384, 2764, 1245, 2677, 1147, 1525, 440], "7684": [1948, 3152, 3059, 653, 54, 2003, 920, 224, 810, 1428, 1195, 1108, 2709, 929, 569, 3054, 859, 803, 1147, 704, 1570, 440, 436, 1113, 502, 69, 1481, 1876], "223": [2858, 2770, 1360, 846, 759, 846, 920, 224, 3097, 1291, 2549, 2524, 83, 569, 2501, 2645, 2424, 2737, 751], "5023": [3040, 226, 2223, 2323, 2291, 1777, 2814, 119, 451, 124, 1195, 1606, 3108, 2362, 276, 1548], "6376": [2605, 2446, 1053, 2928, 846, 920, 224, 2581, 1108, 139, 3054, 803, 276, 436, 802, 2424, 2737, 502], "3781": [2352, 294, 1636, 861, 1621, 1649, 920, 224, 810, 464, 2549, 2524, 1108, 1013, 83, 3054, 2168, 2764, 859, 2362, 803, 1570, 2501, 2645, 436, 2153, 1548, 502, 2677, 465, 1028], "7061": [1133, 2465, 2440, 861, 1615, 2063, 920, 224, 3097, 400, 2549, 2524, 635, 83, 569, 2501, 751], "5196": [2347, 1079, 51, 792, 2323, 595, 2784, 861, 1033, 920, 1907, 1612, 2327, 635, 569, 2362, 2645, 2424, 2737, 1525], "9173": [3040, 166, 2486, 861, 2484, 48, 920, 224, 3097, 1291, 2960, 1013, 2764, 276, 2677, 3019], "3009": [3068, 216, 1828, 653, 1569, 3164, 920, 224, 3097, 2767, 2549, 2524, 929, 83, 569, 2501, 2914, 69, 946], "1644": [2248, 216, 1741, 2928, 473, 2063, 920, 224, 810, 2204, 1607, 1656, 1342, 928, 569, 2638, 821, 2645, 1530], "3876": [515, 221, 1540, 2257, 2928, 2055, 861, 920, 224, 3097, 706, 588, 2732, 257, 569, 608, 1796, 1213, 1147], "651": [1948, 3152, 5, 847, 2190, 507, 958, 820, 653, 181, 1138, 375, 2928, 158, 1871, 65, 920, 1144, 1761, 760, 1548, 1147, 635, 440], "4787": [438, 1535, 2801, 861, 2484, 3023, 920, 224, 3097, 1997, 2549, 2524, 635, 83, 569, 2456, 2168, 2501, 286, 3019, 440], "9450": [670, 216, 374, 861, 44, 3164, 920, 224, 3097, 400, 1656, 2479, 928, 569, 2362, 1762, 276, 2424, 2737, 2409, 1028, 1627, 2661], "179": [1234, 3152, 964, 2257, 2323, 1963, 48, 920, 224, 810, 464, 139, 569, 1762, 276, 2424, 2737, 2409], "4949": [1726, 1079, 2903, 653, 2668, 3164, 920, 224, 810, 3142, 139, 2645, 2661], "6803": [2598, 221, 29, 861, 2484, 1085, 920, 224, 3097, 2767, 1656, 2549, 2524, 1391, 1606, 929, 2962, 83, 2362, 1147, 704, 1608, 2501, 2424, 2737, 1028, 69, 440], "6514": [2347, 433, 1540, 653, 1304, 1085, 920, 224, 3097, 400, 635, 569, 2384, 608, 2936], "1274": [89, 2005, 964, 653, 2243, 1649, 920, 224, 3097, 706, 588, 257, 569, 1796, 276, 1213], "7939": [515, 3152, 1636, 2779, 861, 2484, 2063, 920, 224, 3097, 706, 588, 257, 1387, 2962, 2724, 1796, 1608, 2645, 3044, 1213], "1608": [1550, 2060, 3122, 861, 213, 757, 920, 224, 810, 1102, 588, 2524, 2549, 257, 635, 83, 1796, 276, 2501, 1213, 751], "9200": [1521, 421, 2984, 2928, 80, 510, 2814, 2922, 1384, 2572, 2424, 569, 3044, 608, 2737], "3678": [1640, 3152, 2593, 1853, 861, 960, 846, 920, 224, 3097, 2510], "3417": [1521, 1079, 630, 653, 2243, 2063, 920, 224, 3097, 400, 139, 276, 486, 2502, 1505], "5054": [1550, 911, 471, 2928, 1671, 1174, 920, 224, 3097, 2642, 1656, 1013, 2764, 3051, 276, 3044], "2567": [2554, 378, 580, 653, 2668, 861, 920, 224, 393, 877, 588, 1108, 257, 1213, 3054, 803, 1796, 2645, 436, 502, 1147], "6622": [839, 2918, 1301, 846, 3121, 2282, 920, 224, 3097, 706, 1645, 139, 569, 2384, 608, 584, 2362, 1228, 643, 2947, 3044, 1525], "5857": [1051, 1079, 2121, 2928, 2485, 3164, 920, 1907, 1612, 2327, 2549, 2524, 1656, 2479, 83, 1762, 2501, 2645], "7031": [1121, 221, 29, 861, 152, 653, 920, 224, 3097, 1925, 2534, 569, 2384, 2061, 2362, 276, 3044, 2424, 2737, 1028], "796": [3068, 2770, 964, 861, 152, 2282, 920, 224, 3097, 706, 1108, 2960, 3054, 803, 2362, 1147, 436, 502, 1028, 3019], "5973": [2069, 1191, 340, 1142, 653, 145, 48, 920, 1907, 1612, 2327, 2549, 2524, 83, 569, 2501, 802, 1525], "8913": [308, 3152, 640, 2928, 2145, 3164, 920, 224, 3097, 400, 69, 276, 929, 1525, 2912], "8361": [308, 1538, 653, 2668, 861, 920, 224, 3097, 400, 139], "2458": [2248, 378, 640, 653, 210, 846, 920, 224, 3097, 706, 276, 1431, 768], "5720": [89, 1417, 1636, 861, 152, 1649, 920, 224, 3097, 400, 1195, 2960, 635, 139, 3019, 1178, 2362, 2480, 69, 1876], "8952": [1640, 3152, 2334, 653, 3039, 1085, 920, 224, 810, 2204, 139, 3054, 569, 2902, 608, 2168, 2645, 436, 2153, 1147, 440], "3551": [1951, 421, 504, 653, 600, 1085, 920, 224, 810, 2101, 1108, 3054, 803, 2645, 2424, 436, 2737, 502], "7225": [2352, 378, 861, 2484, 48, 920, 224, 3097, 2510, 1555, 1895, 635, 569, 2168, 2362, 2153, 2734, 440], "8495": [670, 221, 964, 861, 152, 757, 920, 224, 810, 12, 257, 2912, 2960, 2936, 635, 928, 569, 139, 2168, 2384, 2362, 2153, 3019, 1525, 2130], "8946": [2069, 2864, 1478, 2141, 653, 784, 861, 920, 224, 810, 970, 1391, 1156, 635, 1147, 318, 2914, 1689, 2184, 440], "8577": [1726, 1079, 653, 2668, 1085, 920, 224, 3097, 400, 2990, 2549, 2524, 588, 257, 2660, 2479, 1213, 83, 2168, 1231, 1762, 1796, 276, 2645, 3044, 1113, 2153, 2501, 768, 2734], "6032": [2605, 509, 2334, 1445, 861, 2611, 3023, 920, 224, 3097, 706, 1656, 2960, 1606, 929, 2936, 928, 569, 3019, 139, 2384, 1147, 704, 440, 2677, 69, 3088, 1876], "79": [1640, 2060, 1798, 3125, 861, 2484, 653, 920, 224, 3097, 2767, 1570, 859], "759": [2554, 476, 2903, 912, 861, 1746, 1649, 920, 224, 810, 1369, 588, 257, 569, 2384, 3054, 608, 2362, 2902, 1796, 436, 3108, 1213], "414": [1133, 2446, 2801, 2928, 473, 2282, 920, 224, 810, 1102, 1656, 2534, 1387, 465, 2168, 2384, 2362, 318, 2645, 2153, 1147, 1525, 2184, 3057], "1168": [2248, 619, 653, 846, 920, 224, 810, 970, 257, 569, 608, 2362, 2645, 3044, 1113, 2130], "1788": [308, 3152, 1538, 653, 2668, 846, 920, 224, 3097, 1989, 588, 257, 569, 2061, 608, 1796, 276, 2645, 1213, 2677], "7120": [2554, 1417, 955, 861, 1955, 2282, 920, 224, 3097, 1889, 1505, 928, 569, 2424, 2737, 763, 751], "5448": [1199, 1535, 2928, 1659, 3164, 920, 224, 3097, 400, 2549, 2524, 1505, 83, 569, 2501, 2645, 2424, 2737, 3057], "9350": [89, 1535, 937, 3084, 2051, 653, 920, 1907, 2185, 2538, 1656, 1108, 3054, 2168, 2902, 803, 802, 436, 2645, 2153, 502, 751], "636": [2665, 433, 498, 604, 2323, 2205, 1649, 920, 224, 3097, 2510], "5247": [194, 294, 630, 887, 1047, 2280, 1649, 920, 224, 3097, 1889, 588, 1764, 257, 1342, 2936, 139, 569, 2384, 2362, 1796, 318, 2645, 1245, 276, 2638, 1213, 1028, 2184, 1505], "3788": [3048, 378, 2192, 2928, 2518, 653, 920, 1907, 2185, 1043, 569], "9152": [1521, 3152, 628, 846, 2787, 1085, 920, 224, 3097, 2767, 588, 2549, 2524, 1108, 3057, 257, 1213, 83, 3054, 569, 803, 2362, 1796, 2501, 436, 2424, 2737, 502, 1028, 2734], "5042": [1121, 1417, 964, 912, 2323, 1963, 2928, 920, 224, 3097, 706, 1525, 2912], "2703": [1640, 3152, 653, 2668, 846, 920, 224, 810, 553, 928, 276, 1505], "8534": [2858, 166, 2801, 1412, 861, 152, 861, 920, 224, 3097, 706, 1656, 1607, 3057, 928, 569, 2168, 2384, 1530, 2153, 2677, 946, 1509, 751, 156], "5344": [515, 3152, 2334, 653, 2282, 920, 224, 810, 18, 1108, 2737, 257, 929, 3054, 569, 318, 802, 2424, 69, 2184, 139, 803, 704, 1796, 276, 1839, 502, 763, 588, 436, 821, 1213, 3057], "4585": [2846, 2446, 51, 475, 507, 653, 2853, 2000, 846, 2825, 920, 1907, 1612, 2327, 2549, 2524, 83, 2501, 2645, 3044, 2424, 2737, 2409], "5446": [1951, 165, 2979, 653, 2103, 3164, 920, 1907, 1612, 795, 1387, 3054, 2902, 436, 1147, 440], "7712": [1133, 619, 964, 1537, 846, 1687, 2330, 2814, 119, 451, 2568, 928, 2265, 2679, 2661, 1656, 257, 1843, 2362, 2409, 1525, 1387, 139, 1796, 440, 588, 2936, 635, 675, 2384, 3143, 2194, 1213, 3088, 1147], "2101": [2347, 911, 2941, 653, 1569, 247, 920, 1144, 1761, 760, 2645], "7207": [194, 2465, 1350, 2928, 2485, 3164, 920, 224, 3097, 1291, 588, 1195, 1764, 257, 2912, 569, 1796, 1245, 2424, 2737, 1213, 2677, 1147, 1525, 751], "5759": [1640, 3152, 838, 653, 1539, 2003, 2814, 119, 1644, 2208, 2534, 1108, 2734, 2023, 2912, 1895, 1013, 1645, 1505, 3054, 2764, 803, 436, 2424, 1431, 2737, 502, 1525, 3057], "2167": [3040, 433, 1037, 653, 2243, 1649, 920, 224, 3097, 400, 1656, 1147, 2384], "8013": [1051, 216, 2801, 2323, 2070, 757, 2814, 119, 1644, 404, 1075, 2061, 2409, 276, 2645, 1548, 1505], "7377": [1133, 294, 29, 861, 2297, 3023, 920, 224, 3097, 400, 2549, 2524, 83, 2501, 768, 2734, 440], "2993": [2605, 476, 861, 2484, 846, 920, 224, 3097, 2510, 588, 739, 1195, 257, 2502, 2362, 1796, 802, 1213, 486, 3057], "5862": [2347, 1535, 964, 2457, 2928, 188, 3164, 920, 224, 810, 464, 2549, 2524, 588, 1764, 257, 635, 83, 569, 1796, 2501, 276, 1245, 1213], "1951": [515, 1222, 2256, 13, 1354, 861, 800, 2929, 48, 2966, 920, 1144, 1761, 760, 1990, 3093], "6852": [2248, 1191, 2927, 653, 1304, 2282, 920, 224, 3097, 2642, 2549, 2524, 1108, 2709, 2912, 2153, 83, 2168, 3054, 803, 2501, 436, 2424, 2737, 502, 1525], "6073": [1948, 3152, 2140, 861, 621, 2330, 2814, 119, 451, 1134, 2549, 2524, 83, 2501, 2645, 2424, 2737], "5172": [1550, 1618, 1351, 2928, 2485, 861, 920, 224, 3097, 1291, 2549, 2524, 1108, 635, 139, 3054, 83, 803, 2501, 802, 2424, 436, 2737, 502], "6496": [1640, 1713, 472, 846, 1715, 3023, 920, 224, 810, 1428, 1391, 1108, 928, 2645, 2737, 2912, 3054, 569, 2424, 1525, 751, 1195, 1387, 83, 803, 502, 440, 2549, 2524, 2936, 635, 2384, 2902, 608, 2724, 2501, 436, 1147], "2311": [1951, 165, 154, 2928, 1600, 1085, 920, 224, 810, 464, 1108, 928, 1147, 1608, 2645, 2914, 2153, 2737, 1530, 1028, 1505, 1876, 2661, 1075, 257, 2960, 3054, 569, 2319, 2362, 1431, 2424, 2409, 69, 1607, 1342, 527, 2962, 139, 855, 2061, 2168, 83, 803, 704, 1796, 2947, 276, 502, 588, 2524, 2549, 2902, 2638, 2501, 436, 1213, 3019, 3057], "1638": [1948, 3152, 1363, 846, 2744, 3116, 2814, 119, 1644, 1850, 2990, 1108, 2479, 1013, 3061, 1362, 1231, 2645, 53, 2153, 2737, 1548, 1028, 1505, 914, 257, 3054, 569, 2764, 2362, 802, 2424, 1113, 1213, 2130, 1195, 2734, 2168, 2061, 803, 1796, 276, 502, 440, 588, 1968, 1762, 436, 1295, 1147, 3057, 390], "2847": [1726, 2864, 2831, 846, 759, 3164, 920, 224, 810, 3142, 139, 2384, 440], "4491": [670, 1618, 794, 2323, 1963, 2063, 920, 224, 3097, 1997, 1391, 2502, 2962, 1013, 569, 2764, 608, 318, 276, 1608, 1147, 486, 2184, 440], "7064": [1726, 2465, 2663, 1194, 861, 231, 3164, 920, 1907, 1612, 2327, 929, 2960, 139, 569, 3019, 1147, 2362, 69, 1525], "5070": [1550, 2770, 2281, 2848, 861, 152, 861, 920, 224, 810, 2204, 569, 584, 276, 1228], "3263": [1051, 433, 2481, 846, 3003, 3164, 920, 1907, 1612, 2327], "5034": [1051, 1079, 2121, 861, 44, 2063, 920, 1907, 1612, 2327, 1968, 1108, 1895, 3061, 3054, 803, 2362, 2656, 436, 2424, 2737, 502, 1028, 1147, 2178], "1898": [3048, 509, 2346, 2928, 473, 1649, 920, 224, 3097, 1889, 2962, 318, 276, 2424, 1608, 2737, 3057, 2184, 2734], "9369": [1199, 1618, 516, 653, 784, 846, 920, 224, 3097, 1989, 2936, 2962, 569, 2384, 1608, 1295, 3057], "6626": [670, 509, 1636, 1055, 2928, 1659, 1085, 920, 224, 3097, 1001, 588, 1391, 257, 2912, 2936, 1213, 855, 704, 1796, 318, 440, 1431, 768, 1295, 3057, 1147, 1525, 2184, 751, 2661], "7434": [3048, 911, 1053, 2958, 2928, 2012, 48, 920, 224, 810, 553, 1108, 3061, 2737, 1505, 1075, 257, 2912, 3054, 2362, 318, 2424, 1525, 2184, 751, 2061, 803, 1796, 502, 588, 1968, 436, 768, 1213], "6704": [308, 3152, 1367, 861, 2484, 3164, 920, 224, 3097, 400, 2549, 2524, 83, 2501, 2645, 2424, 2737, 1147], "3563": [2347, 476, 593, 2323, 1963, 861, 920, 224, 810, 3142, 1968, 1108, 3061, 3054, 803, 436, 2424, 768, 2737, 502, 2677], "3346": [89, 378, 1622, 1194, 846, 3003, 846, 920, 1144, 1761, 760, 517, 2728, 2362], "8951": [839, 3152, 1902, 861, 468, 1777, 920, 224, 3097, 2642, 1391, 2936, 635, 2384, 276, 3044, 1147, 440], "8920": [2347, 1191, 1636, 2928, 1659, 48, 920, 224, 3097, 706, 966, 635, 569, 853, 2424, 2737, 2677], "9310": [1948, 1565, 1830, 861, 152, 846, 920, 224, 3097, 400, 1764, 2660, 635, 569, 1245, 2424, 2737], "5489": [839, 294, 2908, 242, 656, 653, 784, 861, 920, 1144, 1761, 760, 2549, 2524, 83, 569, 859, 1570, 2501, 2645], "5411": [2846, 3152, 1254, 356, 247, 920, 224, 3097, 706, 1195, 1108, 2912, 1387, 527, 139, 3054, 803, 2362, 802, 2645, 436, 502, 1525], "4729": [3048, 2446, 1828, 3084, 1166, 757, 2814, 119, 451, 124, 966, 569, 853, 276, 2424, 2737, 2677], "8912": [194, 378, 1798, 861, 2484, 48, 920, 224, 3097, 706, 2645], "1852": [670, 2770, 2801, 3101, 861, 2611, 3023, 920, 224, 810, 2204, 588, 257, 2960, 929, 635, 2936, 3019, 2384, 704, 1796, 276, 2645, 2424, 2737, 1213, 69, 751], "7074": [308, 2360, 633, 653, 2243, 1047, 920, 224, 810, 1102, 569, 608], "8017": [2858, 294, 628, 2928, 473, 653, 920, 224, 3097, 706, 1108, 1387, 3054, 803, 276, 436, 2645, 502], "7322": [2554, 165, 2140, 861, 213, 1085, 920, 224, 810, 1369], "3069": [454, 1222, 653, 2243, 3164, 920, 224, 810, 394, 440, 1391, 718, 2594, 1147], "146": [2347, 2918, 1036, 653, 2243, 1649, 920, 224, 3097, 706, 1108, 635, 139, 3054, 855, 803, 704, 436, 768, 1431, 502, 751], "6870": [89, 1222, 1152, 1047, 555, 2063, 920, 224, 3097, 706, 2549, 2524, 83, 2501, 751], "4813": [2248, 433, 3128, 653, 54, 861, 920, 224, 3097, 1025, 635, 1147, 2645, 1387], "8435": [1234, 3152, 964, 2928, 131, 3164, 920, 224, 3097, 706, 139, 1147, 1525, 2912], "8349": [438, 1713, 864, 2323, 2704, 1649, 920, 224, 810, 1161, 2735, 569, 717, 440], "4754": [1726, 2464, 1920, 861, 2611, 758, 2814, 119, 1644, 1370, 2661, 2645, 2424, 2737, 2936], "3631": [438, 509, 653, 2243, 3164, 920, 224, 3097, 400, 1656, 1764, 2479, 2936, 928, 569, 2168, 2384, 1762, 276, 1245, 2839, 2153, 2677, 1509, 1505], "6525": [89, 2918, 2394, 653, 359, 861, 920, 1144, 1761, 760, 2617, 1843, 569, 2168, 2645, 3019, 2679], "5177": [89, 509, 1036, 2928, 2485, 1649, 920, 224, 3097, 706, 1391, 635, 569, 276, 2424, 2737, 1147, 440], "6424": [1051, 2060, 1540, 861, 1974, 2928, 920, 224, 810, 2204, 69, 569, 929], "653": [1521, 421, 2346, 2928, 473, 1777, 920, 224, 3097, 2642, 588, 2524, 2549, 257, 83, 1796, 276, 2645, 2424, 2501, 2737, 1213], "4995": [1199, 1191, 2941, 653, 210, 2928, 920, 224, 3097, 2510, 1656, 3054, 2168, 2902, 436, 2153, 1147], "6276": [1133, 1417, 1798, 861, 152, 1085, 920, 224, 3097, 1889, 139, 2168, 2384, 276, 2645, 2153], "6641": [308, 3152, 499, 618, 846, 759, 48, 920, 224, 3097, 400, 1656, 588, 2549, 2524, 2737, 257, 83, 2168, 1796, 2501, 2645, 2424, 2153, 1213, 440], "7539": [1726, 1618, 640, 846, 740, 2063, 920, 224, 3097, 400, 1195, 751, 569, 3108, 608, 2362, 440, 2645, 768, 2409, 1147, 1493, 1505, 2661], "6216": [839, 3152, 1081, 846, 1139, 48, 920, 224, 3097, 400, 2962, 440, 1608, 821, 2914, 2409, 2661], "4816": [2665, 2918, 3022, 653, 784, 861, 920, 224, 3097, 400, 139, 569, 2362, 1295, 69, 1525, 763, 3057, 1876], "163": [1449, 3152, 1381, 507, 653, 359, 861, 920, 1144, 1761, 760, 2677, 276, 2737, 2424, 3044], "8884": [1521, 1191, 899, 2925, 653, 784, 846, 920, 1907, 1612, 2327, 588, 257, 859, 1796, 1570, 1213], "8258": [438, 226, 2928, 2485, 3084, 920, 1144, 1761, 760, 1147, 2168, 2153], "7634": [1199, 509, 1636, 861, 1190, 1085, 920, 224, 3097, 706, 2549, 2524, 1195, 1764, 1342, 83, 569, 2362, 2638, 318, 1245, 2424, 276, 2737, 2501, 2184], "1869": [1133, 433, 2583, 2928, 2351, 2063, 920, 1907, 1612, 2327, 569, 802, 2424, 2737, 946, 2970], "2135": [2665, 1713, 964, 846, 1372, 1649, 920, 224, 3097, 1889, 2549, 2524, 1968, 1387, 3061, 83, 2061, 2724, 996, 2501, 2645, 2424, 2737], "4629": [1948, 421, 1937, 653, 54, 653, 920, 224, 3097, 706, 635, 395, 1362, 3161, 440, 2645, 2424, 2737, 2677, 1147, 751, 390], "2496": [1449, 433, 3077, 2257, 653, 210, 3164, 920, 224, 3097, 706, 1656, 69, 946, 569, 1876], "6342": [2248, 378, 2932, 861, 2484, 3164, 920, 224, 3097, 400, 1195, 2023, 635, 569, 2362, 440, 69, 2661], "7396": [1051, 216, 2908, 242, 2024, 861, 231, 2323, 920, 224, 3097, 329, 91, 2962, 2168, 569, 1608, 2153, 2409], "9287": [308, 3152, 653, 1539, 2919, 2814, 119, 1644, 1370, 1764, 2479, 1013, 1342, 569, 2764, 1762, 2638, 276, 1245, 2424, 318, 2737, 1548, 2184, 1505], "6083": [3048, 2446, 2975, 861, 2611, 2003, 920, 224, 810, 2204, 2912, 1387, 635, 2724, 2645, 1525, 751], "5312": [1948, 3152, 1513, 653, 1430, 48, 920, 224, 2581, 2737, 635, 139, 2168, 859, 1570, 2645, 802, 2424, 2153, 1147], "3193": [1234, 3152, 794, 2714, 2928, 1659, 48, 920, 224, 3097, 400, 2549, 2524, 1108, 635, 751, 83, 3054, 803, 2501, 436, 2645, 502, 1505], "9180": [2554, 2060, 2494, 2065, 888, 507, 976, 1034, 653, 2322, 1179, 770, 653, 1284, 742, 998, 920, 1144, 1761, 760, 2409, 2384, 257, 2936], "9482": [1554, 2446, 923, 339, 653, 2044, 2282, 920, 224, 3097, 400, 1195, 1764, 2479, 635, 569, 1762, 276, 1245, 1505], "4680": [1948, 3152, 2121, 2715, 846, 2639, 846, 920, 224, 3097, 400, 2549, 2524, 2936, 635, 83, 2384, 276, 2501], "3041": [454, 294, 1540, 2296, 653, 1304, 3164, 920, 224, 810, 2201, 2479, 2936, 139, 2384, 1762, 3051, 802, 3044, 2914, 2737, 2424, 3057], "7883": [1133, 2864, 2334, 2323, 1963, 1649, 920, 224, 810, 2964, 966, 2960, 929, 3019, 139, 855, 2362, 1147, 704, 1431, 2409, 69, 1525], "915": [438, 166, 1301, 846, 759, 2003, 920, 224, 810, 602, 1074, 257, 2936, 2384, 430, 2760, 3161, 1147, 2661], "7253": [2605, 509, 937, 846, 1372, 1649, 920, 224, 3097, 2333, 1391, 2962, 3054, 2902, 1608, 2645, 2424, 436, 2737, 1147, 440], "7650": [1133, 1535, 3047, 514, 2928, 1605, 1488, 2928, 813, 920, 1907, 1612, 2327, 2502, 635, 3054, 318, 276, 436, 502, 486, 2184], "6211": [1554, 294, 1832, 2928, 239, 1047, 920, 224, 3097, 2510, 588, 1108, 1764, 1013, 502, 3054, 569, 2764, 803, 1796, 1245, 436, 2424, 2737, 1213], "8845": [1550, 3152, 591, 2046, 861, 1974, 861, 920, 1907, 1612, 2327, 1607, 928, 569, 1530], "3245": [2069, 2918, 1851, 324, 2323, 861, 920, 224, 3097, 400, 1108, 2912, 1387, 635, 3054, 569, 2902, 803, 802, 2645, 436, 502, 1147, 1525], "8810": [2069, 1079, 3013, 653, 2580, 3062, 2814, 119, 1644, 1850, 2549, 1968, 2524, 2479, 3061, 1505, 83, 1362, 1762, 2501, 2424, 2737, 2734, 390], "7317": [438, 2864, 640, 861, 152, 3164, 920, 224, 3097, 706, 2549, 2524, 588, 1391, 2936, 83, 2384, 1796, 2501, 2424, 2737, 1213, 1147, 440], "1360": [2605, 1079, 2192, 653, 3098, 2063, 920, 1907, 2185, 1043, 2534, 2936, 569, 2384, 2362, 2661], "916": [308, 2052, 2323, 676, 2063, 920, 224, 810, 553, 1195, 2660, 139, 1856, 569, 608, 318, 2424, 2737, 2184], "3938": [1726, 1535, 964, 653, 2668, 3164, 920, 224, 3097, 706, 2534, 133, 1530], "9352": [1550, 2770, 3140, 3016, 1047, 644, 653, 920, 224, 3097, 2510, 1342, 139, 2384, 2362, 2638, 276, 2424, 2737, 1028], "7187": [1051, 509, 1636, 846, 759, 1649, 920, 224, 3097, 706, 1656, 2936, 2962, 569, 2384, 440, 2424, 2737, 1147, 2661], "6820": [1948, 1565, 496, 861, 3145, 757, 920, 1907, 1612, 795, 1656, 1607, 588, 257, 929, 2912, 2015, 2153, 928, 569, 2168, 855, 704, 1796, 1839, 1431, 1530, 1213, 69], "5637": [2352, 421, 334, 2323, 1963, 3164, 920, 224, 3097, 706, 588, 257, 527, 635, 1013, 569, 2061, 2764, 1796, 2424, 2737, 1213], "1805": [839, 619, 593, 1047, 1527, 2063, 920, 224, 3097, 706, 1656, 139, 2384, 821, 3044, 2424, 2737, 768, 1147, 1525, 440], "2692": [2554, 294, 937, 653, 1740, 3023, 920, 1907, 1612, 2327, 2534, 2912, 2936, 2384, 3044, 1525, 3057], "1486": [1640, 1417, 2927, 653, 2243, 2063, 920, 224, 3097, 706, 2479, 1895, 2645, 2737, 2153, 1548, 1028, 3057, 3054, 2362, 2656, 2424, 751, 1195, 83, 2168, 276, 2178, 2549, 2524, 1762, 2501, 436, 2734], "647": [1234, 3152, 29, 653, 54, 861, 920, 224, 3097, 400, 2549, 2524, 1108, 83, 2168, 3054, 803, 318, 436, 2501, 2153, 502, 2184], "2094": [1234, 3152, 586, 653, 784, 2323, 920, 224, 3097, 2510, 588, 257, 2912, 751, 1796, 2645, 1213, 1147, 1525, 3057], "1028": [2858, 433, 2281, 861, 2611, 1777, 2814, 119, 451, 2041, 1147], "1273": [2069, 2465, 964, 861, 152, 2063, 920, 224, 3097, 2767, 1656, 440, 1391, 1147], "965": [670, 619, 29, 861, 2484, 846, 920, 224, 3097, 706], "6318": [194, 1222, 51, 1316, 1354, 861, 960, 115, 2063, 2871, 920, 1907, 1612, 2327, 2549, 2524, 635, 83, 276, 2645, 2424, 2501, 2737, 598, 2677], "3409": [2069, 911, 1226, 3133, 653, 784, 861, 920, 224, 3097, 329, 2549, 2524, 2936, 83, 2384, 2501, 2424, 2737], "7178": [1550, 2060, 2006, 653, 1740, 1649, 920, 224, 393, 588, 257, 569, 1796, 2424, 2737, 1548, 1213], "1649": [2665, 2770, 2482, 1542, 507, 1288, 861, 142, 861, 800, 920, 1907, 1612, 2160, 1195, 1108, 3054, 569, 2168, 803, 2362, 2902, 436, 2153, 502, 64], "3953": [670, 911, 964, 861, 213, 3164, 920, 224, 3097, 706, 588, 257, 635, 111, 1013, 2764, 1796, 276, 802, 1213], "2936": [2605, 2465, 1622, 626, 1047, 2634, 2063, 920, 1907, 1612, 2327, 2549, 2524, 83, 569, 2501], "6863": [1948, 3152, 1540, 2873, 861, 213, 1085, 920, 224, 810, 1102, 2153, 257, 2912, 2362, 318, 3044, 1431, 1525, 2184, 1945, 2130, 139, 2168, 855, 704, 1796, 1211, 588, 2936, 2384, 768, 1213], "6017": [454, 1222, 496, 861, 152, 653, 920, 224, 3097, 400, 1147, 1570, 2168, 859, 828], "6767": [1554, 1535, 2223, 2323, 2289, 757, 920, 224, 3097, 2642, 588, 1195, 257, 2502, 1387, 1013, 139, 2764, 2724, 2362, 1796, 276, 768, 1213, 486], "9135": [308, 3152, 1636, 861, 2484, 1649, 920, 224, 3097, 706, 2549, 2524, 588, 1387, 83, 569, 2724, 1796, 2501, 1213], "1721": [2605, 1191, 2801, 2873, 653, 2243, 1649, 920, 224, 810, 2201, 1656, 1606, 569, 859, 608, 1570, 276, 2424], "7110": [2248, 2770, 640, 653, 210, 653, 920, 224, 3097, 400, 751, 569, 2424, 276, 2737], "3059": [454, 433, 498, 2381, 2323, 1427, 3164, 920, 1907, 1612, 795, 2168, 569, 2456, 1525, 2153], "5586": [515, 1222, 964, 2308, 861, 213, 653, 920, 224, 3097, 1889, 1968, 1013, 635, 3061, 569, 2384, 2764, 608, 2645], "8817": [1449, 1417, 496, 715, 861, 152, 3164, 920, 224, 3097, 706, 2424, 2645, 2737, 2724, 1387], "4452": [438, 1713, 472, 861, 1594, 1777, 2814, 119, 1644, 2208, 1013, 635, 1548, 2764, 3051, 318, 3044, 2409, 2184, 3057, 2661], "6880": [1554, 619, 586, 148, 861, 2433, 861, 920, 224, 3097, 2510, 1656, 1108, 3054, 569, 803, 440, 436, 502, 1028, 1147, 2661], "6109": [515, 1222, 2150, 2928, 2485, 3164, 920, 1144, 1761, 760, 2549, 2524, 2479, 928, 569, 83, 2319, 1762, 276, 2501, 2424, 2737, 69, 3057, 1876], "4781": [1199, 619, 2494, 2065, 888, 507, 976, 1034, 653, 2322, 1179, 770, 653, 1284, 742, 998, 920, 1144, 1761, 760, 588, 257, 2502, 2660, 139, 1796, 276, 802, 1213, 486], "3084": [515, 294, 1045, 2768, 861, 2484, 653, 920, 224, 3097, 1997, 1607, 588, 928, 569, 1796, 276, 1530, 1213], "6076": [2846, 421, 1540, 1177, 861, 489, 2282, 920, 224, 393, 2361, 2479, 2645, 2737, 1028, 257, 2362, 802, 2424, 1387, 83, 139, 1796, 276, 2549, 2524, 588, 2936, 2384, 1762, 2501, 1213, 1147, 2734], "5897": [1133, 166, 2223, 2928, 473, 2063, 920, 224, 3097, 706, 1656], "5954": [2248, 378, 1909, 2323, 3045, 2814, 119, 1644, 1370, 395, 139, 3161, 276, 821, 2645, 1548], "4133": [1550, 1191, 2223, 861, 152, 1649, 920, 224, 2867, 894, 1895, 2936, 569, 2384, 2362, 276, 1431, 1548, 1525, 908, 751, 2661], "5086": [1449, 1943, 677, 861, 1621, 757, 920, 224, 810, 14, 569], "6504": [1133, 2060, 2494, 2065, 888, 507, 976, 1034, 653, 2322, 1179, 770, 846, 422, 920, 1144, 1761, 760, 2960, 302, 1211, 3019, 946, 1945], "5881": [89, 1222, 628, 861, 1955, 2919, 2814, 119, 451, 957, 2549, 2524, 1801, 588, 1764, 257, 635, 806, 83, 569, 2168, 1796, 2501, 1245, 2153, 1213], "3386": [454, 433, 1540, 653, 2243, 757, 920, 224, 810, 1102, 1993, 1895, 2015, 928, 2737, 1548, 1876, 739, 257, 2912, 929, 3054, 569, 2656, 2362, 2424, 1213, 69, 1525, 1387, 83, 139, 704, 1796, 1839, 2178, 2549, 2524, 588, 2724, 2501, 436, 1295, 3057], "1531": [2598, 2465, 964, 861, 468, 846, 920, 224, 3097, 706, 1013, 1645, 928, 2015, 859, 1570, 2459, 2737, 2728, 2653, 257, 2912, 1559, 569, 2764, 318, 3044, 2424, 1525, 2184, 1796, 1839, 1627, 588, 1662, 2713, 2936, 395, 2384, 1213], "9271": [2347, 2446, 653, 2668, 861, 920, 224, 3097, 2510, 1607, 635, 928, 569, 2384, 859, 1570, 276, 1530], "9070": [670, 421, 472, 861, 1751, 1281, 2814, 119, 1644, 1850, 2384, 318, 276, 768, 2424, 2737, 1548, 2728, 2184], "5211": [2605, 2465, 1937, 1055, 861, 152, 846, 920, 224, 3097, 1812, 2549, 2524, 83, 2501, 1147, 1481, 751], "6449": [2665, 166, 1081, 653, 1225, 653, 920, 224, 3097, 706, 1656, 1387, 3054, 569, 2902, 704, 436], "6721": [2598, 378, 29, 2597, 846, 759, 2003, 920, 224, 3097, 1997, 139, 569, 257, 2362], "4706": [2248, 1417, 936, 2394, 861, 1974, 861, 212, 920, 1144, 1761, 760, 928, 569, 2362, 802, 1028, 2661], "3467": [670, 3152, 1867, 3084, 762, 846, 920, 224, 810, 588, 1108, 257, 1213, 3054, 2384, 803, 1796, 276, 436, 502], "6209": [515, 165, 1053, 1141, 2928, 1884, 349, 920, 224, 3097, 706, 588, 257, 139, 569, 2362, 1796, 2645, 802, 1213, 751], "5151": [515, 165, 206, 2928, 846, 920, 1907, 1612, 1065, 139, 569, 2384, 3057, 2936], "2124": [839, 1222, 1541, 861, 152, 2063, 920, 1907, 1612, 2327, 2424, 2737], "1572": [1199, 2770, 2, 846, 45, 1085, 920, 1907, 1612, 2327, 2549, 2524, 1968, 3061, 83, 2501, 2645, 2424, 2737], "2988": [1521, 1191, 1902, 653, 2668, 846, 920, 224, 3097, 706, 929, 1387, 2724, 2362, 802, 2424, 2737, 69], "7295": [1554, 509, 1540, 861, 152, 1085, 920, 224, 3097, 400, 2549, 2524, 139, 569, 83, 2501, 802, 1147, 763], "6372": [1951, 2770, 1636, 2928, 473, 653, 920, 224, 3097, 1291, 395, 569, 3161, 276, 440], "7852": [308, 3152, 964, 861, 152, 1085, 920, 224, 3097, 2333, 326, 1391, 1013, 584, 1228, 2737, 2676, 2136, 486, 2751, 1075, 94, 2912, 3054, 569, 2764, 2362, 286, 802, 1431, 1113, 2424, 3044, 1525, 751, 2534, 855, 2061, 2168, 101, 276, 2886, 1420, 440, 268, 2502, 2936, 635, 2384, 2902, 436, 768, 2180, 1147], "1152": [670, 2446, 2833, 207, 846, 673, 48, 920, 224, 810, 2204, 569, 440], "5706": [1051, 2918, 2223, 861, 2611, 2330, 2814, 119, 451, 957, 1691, 2645, 2737, 1548, 1656, 257, 1794, 929, 569, 2424, 1113, 69, 2130, 1387, 83, 704, 1796, 276, 1627, 2549, 2524, 588, 635, 2384, 2501, 1213], "2030": [1199, 166, 964, 861, 2611, 1174, 2814, 119, 1644, 2753, 2912, 318, 2424, 2737, 1525, 2184, 2661], "8891": [1234, 3152, 1106, 2323, 725, 48, 920, 1144, 1761, 760, 1295, 276, 2384, 2936], "5024": [1199, 3152, 2338, 653, 145, 653, 920, 224, 3097, 400, 2534, 2962, 569, 2384, 608, 1608, 2645], "7182": [839, 294, 2354, 2323, 1697, 48, 920, 224, 3097, 2009, 2990, 1231, 1113], "3629": [1121, 2060, 2436, 2373, 846, 759, 1174, 920, 224, 810, 2697, 1108, 2936, 2962, 3054, 569, 2384, 803, 1608, 436, 2424, 2737, 1548, 502], "1154": [1554, 1222, 1859, 653, 359, 846, 920, 224, 3097, 329, 966, 257, 569, 276, 821, 2130, 440], "7332": [308, 3152, 1540, 861, 1621, 2063, 920, 224, 3097, 400, 1108, 1387, 3054, 2168, 803, 276, 436, 2645, 2153, 502, 3057], "7328": [839, 1417, 781, 2700, 861, 2484, 2063, 920, 224, 3097, 400, 2549, 2524, 257, 2936, 2962, 83, 2384, 1295, 1608, 276, 2501, 2409, 598, 2677, 2130, 2661], "509": [89, 509, 640, 104, 861, 2484, 2323, 920, 224, 3097, 329, 2549, 2524, 2962, 83, 1608, 2501, 440], "8885": [1951, 165, 2593, 861, 2484, 3164, 920, 224, 3097, 706, 395, 3161, 2661, 2936], "2005": [2248, 2446, 2354, 846, 45, 846, 920, 224, 3097, 2009, 139, 69, 929, 2362], "3699": [3048, 433, 885, 2928, 1679, 48, 920, 1907, 1612, 2327, 1147, 751], "4261": [1726, 911, 580, 653, 1932, 2282, 920, 224, 810, 1102, 1108, 2912, 2936, 635, 3054, 569, 803, 608, 436, 2424, 2737, 502, 1525, 2661], "2599": [438, 216, 29, 653, 54, 2063, 920, 224, 3097, 706, 1075, 2502, 2936, 2384, 2061, 2495, 486], "5645": [438, 1079, 1567, 1047, 644, 48, 920, 224, 3097, 1812, 1968, 3061, 569, 2362, 2914, 1028, 763], "569": [89, 2770, 937, 2928, 1659, 3164, 920, 1907, 1612, 2327, 1656, 2524, 1968, 2549, 1387, 3061, 139, 83, 569, 1362, 2501, 2645, 2424, 2737, 390], "1494": [2598, 509, 2778, 2323, 653, 920, 224, 3097, 400, 1607, 1391, 2153, 928, 569, 2168, 139, 2645, 1530, 1548, 1147, 440], "1103": [2665, 2060, 1540, 653, 2243, 757, 920, 224, 3097, 1889, 1656, 1074, 257, 2574, 162, 430, 2362, 2760, 276, 2424, 768, 2737, 1028], "8586": [3040, 221, 2121, 861, 152, 1085, 920, 224, 3097, 1025, 1656, 2524, 2549, 83, 139, 2501], "8544": [2347, 476, 1175, 426, 2928, 1661, 1085, 920, 224, 3097, 400, 1013, 276, 257, 2130, 2764], "5605": [2605, 1535, 2223, 653, 2668, 3023, 920, 224, 810, 1428, 1074, 326, 2491, 2691, 1645, 928, 2760, 2676, 2661, 1656, 257, 2960, 2912, 569, 2319, 1992, 1431, 1213, 1525, 2130, 751, 2582, 1699, 139, 1796, 1627, 588, 2936, 430, 1295, 3019, 1753, 3057, 2819], "36": [2248, 294, 640, 653, 1225, 48, 920, 224, 3097, 706, 588, 1108, 257, 1387, 1213, 3054, 803, 1796, 276, 436, 2645, 502], "68": [2069, 294, 2494, 2065, 888, 507, 976, 1034, 2323, 1501, 988, 2348, 48, 2365, 920, 1144, 1761, 760, 2990, 257, 1856, 1231, 2362, 383, 3051, 3044, 1113, 946], "6299": [89, 476, 1902, 512, 861, 420, 2063, 920, 224, 810, 1290, 569, 1431, 2424, 2737, 763, 751], "5212": [515, 2142, 1901, 653, 2243, 2919, 2814, 119, 1644, 2414, 1656, 2936, 2384, 276, 2645, 2424, 2737], "1174": [1234, 3152, 29, 2928, 1659, 2323, 920, 224, 3097, 400, 1108, 2936, 3054, 569, 803, 436, 2424, 2737, 2409, 502, 2661], "3228": [1199, 1535, 2066, 2175, 861, 975, 2063, 920, 1907, 1612, 2327, 1656, 1391, 1108, 1895, 1013, 3054, 2456, 2764, 859, 2656, 803, 1570, 436, 2424, 2737, 502, 1147, 2178, 440], "1622": [1726, 3152, 60, 846, 1372, 2282, 920, 224, 3097, 706, 1013, 928, 2895, 859, 1570, 2645, 2737, 1530, 1876, 2960, 2912, 929, 569, 2764, 2362, 1245, 2424, 802, 69, 1525, 1607, 1195, 1856, 704, 276, 1764, 635, 3019], "1286": [1640, 1417, 1636, 536, 2928, 80, 48, 920, 224, 3097, 1025, 2534, 2384, 859, 1570, 2645, 1113, 3143, 2265, 2285], "5969": [515, 2142, 1081, 861, 152, 2063, 920, 224, 3097, 706, 2549, 2524, 1013, 83, 569, 2384, 2764, 2501, 3044], "6811": [515, 221, 794, 653, 1225, 653, 920, 224, 810, 2204, 704, 2539, 2362], "4660": [1133, 1222, 542, 861, 621, 1085, 920, 224, 810, 1927, 704, 350, 1147, 440], "9395": [1951, 2770, 846, 1881, 2282, 920, 224, 810, 3142, 2732, 1829, 2168, 2456, 2362, 1479, 3161, 2153, 1854, 2335, 2734], "6335": [1550, 2770, 109, 507, 846, 3003, 3164, 920, 1144, 1761, 760, 1656, 2549, 2524, 2734, 2962, 139, 2168, 83, 2362, 2068, 1608, 802, 2501, 2153, 751], "3898": [308, 3152, 51, 263, 3109, 653, 2853, 432, 861, 2938, 920, 1907, 1612, 2327, 1656, 2115, 2534, 2384, 853, 2362, 3044, 2442], "7996": [1234, 3152, 1937, 2532, 2928, 497, 757, 920, 224, 3097, 706, 1662, 2734, 1895, 928, 3054, 139, 2168, 2656, 1530, 436, 2153, 2677, 2178], "9325": [2248, 2446, 2346, 861, 1955, 2063, 920, 224, 3097, 706, 1195, 533, 1645, 2168, 276, 2153], "931": [1234, 3152, 964, 653, 2668, 349, 920, 224, 3097, 706, 486, 2502, 1387, 2962, 139, 855, 569, 1912, 2362, 704, 1608, 802, 1431, 2914, 1028, 1525], "3421": [308, 3152, 2927, 2928, 473, 3023, 920, 224, 3097, 400, 1607, 1391, 2936, 635, 928, 569, 2384, 318, 276, 1530, 1147, 2184, 440], "4314": [2858, 2918, 357, 861, 44, 757, 920, 1907, 1612, 2327, 2549, 2524, 83, 139, 3054, 569, 1912, 2902, 2501, 436, 1525], "4088": [454, 1417, 1064, 1629, 653, 181, 48, 920, 1907, 2185, 1043, 1764, 569, 1245, 2424, 2737, 763], "8133": [2858, 476, 2222, 482, 2928, 2485, 1085, 920, 224, 3097, 2510, 635, 821, 2645, 2409, 1493, 751, 2661], "1277": [515, 3152, 964, 2868, 653, 2668, 2282, 920, 224, 3097, 400, 139, 569, 855, 704, 2645, 1431, 1147, 751], "4533": [2665, 2864, 1920, 653, 1093, 3062, 2814, 119, 451, 1767, 1656, 2549, 2524, 1387, 1013, 635, 83, 2764, 2724, 276, 2645, 2424, 2501, 2737, 1548, 1493], "7766": [1199, 1535, 2984, 3084, 4, 846, 920, 224, 810, 553, 2285, 569, 1113, 3143, 2265], "3646": [3048, 509, 1301, 2323, 2063, 920, 1907, 2185, 1043, 588, 257, 928, 569, 1178, 2362, 1796, 1213, 3057, 751, 440], "7618": [3048, 221, 3047, 1293, 1354, 846, 2639, 48, 2372, 920, 1907, 1612, 2327, 2677, 569, 751], "8003": [515, 3152, 2080, 2251, 861, 152, 48, 920, 224, 3097, 706, 588, 257, 1796, 2424, 3044, 2737, 1213], "1381": [2598, 476, 2687, 2394, 861, 1974, 653, 920, 224, 3097, 329], "2540": [1554, 2060, 2928, 1659, 48, 920, 224, 3097, 400, 929, 139, 928, 704, 69, 1505, 1876], "354": [2352, 2446, 640, 2685, 861, 2484, 3164, 920, 224, 3097, 1291, 1656, 1764, 1013, 533, 569, 2384, 2764, 1245, 768], "6223": [1550, 509, 1540, 653, 2668, 48, 920, 224, 810, 2204, 1391, 1645, 584, 1228, 2645, 2737, 569, 2362, 1113, 2424, 3044, 2710, 2534, 2629, 2061, 704, 1839, 1689, 440, 635, 2384, 821, 1147], "8266": [1521, 1143, 2801, 772, 2323, 2070, 757, 920, 224, 810, 1369, 966, 1505, 276, 2645, 2424, 2737, 751], "1138": [1948, 3152, 2927, 653, 2243, 2063, 920, 224, 810, 2204, 569], "7288": [308, 3152, 2941, 56, 653, 784, 48, 920, 224, 3097, 2510, 2936, 1013, 635, 569, 2384, 2764, 608, 821, 2409, 2677, 2661], "1592": [1550, 1618, 1053, 1047, 2236, 2063, 920, 224, 810, 1031, 1656, 1391, 2962, 569, 608, 1608, 1548, 1147, 3057, 440], "3002": [3048, 1222, 1238, 846, 673, 48, 920, 224, 3097, 400, 2728, 569, 2914], "6479": [2858, 294, 861, 2484, 3164, 920, 224, 3097, 400, 2384, 286], "8659": [438, 2060, 1636, 653, 210, 2323, 920, 224, 3097, 400, 1195, 569, 2362], "6978": [2858, 1535, 2346, 557, 861, 152, 861, 920, 224, 3097, 706, 1108, 1387, 139, 3054, 569, 803, 2645, 436, 502, 1147, 763, 751, 440], "1426": [308, 2334, 861, 621, 2003, 920, 224, 810, 602, 1074, 569, 430, 2362, 2760, 1663, 3070, 1113], "1185": [670, 2864, 1219, 2323, 2704, 861, 920, 224, 3097, 1025, 1607, 1656, 2015, 928, 139, 2384, 569, 1839, 1530, 2677], "4100": [1234, 3152, 60, 767, 2928, 473, 1649, 920, 224, 810, 464, 2645], "8998": [2598, 911, 2292, 2909, 861, 2433, 861, 920, 1144, 1761, 760, 1656, 855, 704, 3004, 276, 1431, 768, 1260, 1481, 2734], "261": [1449, 294, 1830, 846, 1881, 1085, 920, 224, 810, 464, 407, 1195, 1606, 2936, 2456, 2384, 859, 2362, 2078, 1570, 2409, 276, 2424, 768, 2737, 2661, 1481, 751, 1087], "5486": [2248, 1079, 357, 861, 538, 3164, 920, 1907, 2185, 1043, 569, 2645, 3057], "6471": [2665, 509, 2223, 653, 1093, 2282, 920, 224, 3097, 706, 588, 257, 929, 2479, 2936, 2384, 2362, 1147, 704, 3130, 1796, 276, 1762, 1213, 1028, 69, 3057], "4038": [1449, 226, 3013, 861, 107, 758, 2814, 119, 1644, 1850, 2990, 1108, 1829, 1391, 2479, 3061, 928, 1231, 2645, 2153, 2737, 1548, 2677, 1530, 1028, 1481, 1505, 2661, 1656, 739, 257, 929, 3054, 569, 2362, 1992, 1245, 802, 1113, 1431, 2424, 3044, 69, 1525, 2130, 1607, 2710, 1195, 2709, 1342, 139, 2991, 2629, 855, 2168, 803, 704, 276, 502, 2335, 763, 440, 1968, 1764, 2936, 2617, 2384, 1762, 2638, 436, 768, 1921, 1295, 2943, 1147, 3057], "9038": [89, 509, 1350, 653, 359, 2063, 920, 1144, 1761, 760, 2549, 2524, 83, 569, 2501, 2424, 2737, 751], "4641": [1133, 2770, 2292, 2394, 653, 359, 1085, 920, 224, 3097, 329, 2549, 2524, 2912, 1505, 83, 2501, 276, 2645, 1525, 3057], "6942": [839, 1079, 3020, 2323, 1455, 1085, 920, 224, 3097, 400, 2912, 1387, 569, 2724, 2645, 2424, 2737, 1525, 751], "5433": [1133, 1222, 3022, 2323, 2323, 920, 224, 3097, 706, 1656, 139, 2168, 569, 2153, 1481], "3774": [1554, 433, 2866, 1047, 3127, 846, 920, 224, 3097, 1291, 1656, 1387, 2168, 569, 276, 2153, 69, 1876], "4342": [2605, 911, 1381, 1988, 507, 2323, 1427, 846, 920, 1144, 1761, 760, 1108, 3054, 803, 2645, 3044, 436, 2914, 502], "3036": [2248, 433, 1540, 845, 653, 2243, 1085, 920, 224, 3097, 2767, 2549, 2524, 1108, 83, 569, 3054, 803, 2501, 802, 2424, 436, 2737, 502], "8389": [2347, 1670, 1902, 265, 846, 3103, 3164, 920, 224, 3097, 2767, 2549, 2524, 2912, 83, 569, 139, 859, 584, 828, 1228, 1570, 318, 2501, 1147, 1525, 2184, 3057, 440], "6653": [1121, 509, 2052, 653, 2243, 3164, 920, 224, 3097, 706, 2912, 569, 276, 3057, 1525, 751], "2620": [454, 433, 2801, 653, 2668, 3164, 920, 224, 810, 2204, 588, 1968, 257, 3061, 2384, 1796, 276, 2645, 2424, 2737, 1213], "1191": [1133, 216, 180, 1047, 1527, 3084, 920, 224, 3097, 706, 2549, 2524, 1387, 83, 2501, 2645, 1147], "1834": [1121, 1079, 1358, 656, 2928, 3164, 920, 224, 810, 1614, 1195, 2709, 569, 2362, 2409, 2341, 2728, 2661], "3019": [1726, 1713, 1937, 237, 861, 2484, 846, 920, 224, 3097, 400, 588, 1391, 257, 635, 139, 569, 1796, 276, 2645, 2424, 802, 2737, 2409, 1213, 440, 1147, 2661], "9198": [2665, 2918, 593, 2928, 2055, 2928, 920, 224, 810, 3142, 1147, 440, 569, 2936], "5832": [670, 216, 955, 310, 846, 1122, 757, 920, 224, 810, 2201, 840, 1013, 1645, 3014, 3051, 2645, 2737, 2136, 257, 569, 2764, 2362, 3044, 2424, 2130, 751, 1195, 2612, 83, 3161, 276, 1420, 2549, 2524, 3050, 2936, 395, 2384, 2501, 3108], "3567": [2069, 378, 2932, 2323, 2289, 1649, 920, 224, 3097, 1997, 2936, 1013, 751, 569, 2384, 2764, 276, 2424, 2737, 1548, 598, 1505], "426": [1133, 433, 628, 861, 2611, 1777, 2814, 119, 451, 124, 588, 1764, 257, 2153, 139, 569, 1362, 2168, 1796, 276, 1245, 2424, 768, 2737, 1548, 1213, 2734, 390], "5540": [1640, 2918, 949, 2928, 497, 3164, 920, 224, 810, 1428, 2936, 2962, 569, 2384, 608, 276, 1608, 3044, 2424, 2737], "1526": [1521, 1079, 1636, 2323, 676, 48, 920, 224, 3097, 706, 1195, 569, 855, 2362, 704, 318, 1062, 1431, 768, 1562, 3019, 2184, 440], "4915": [1550, 684, 1466, 2024, 861, 231, 2323, 920, 224, 3097, 2510, 2661], "8568": [1449, 1079, 1547, 656, 653, 3098, 653, 920, 1907, 1612, 2327, 928, 2362], "1879": [1199, 1191, 1487, 846, 1881, 3084, 920, 224, 3097, 706, 1656, 276, 2645], "4031": [454, 2446, 2323, 2004, 1085, 920, 224, 3097, 1025, 1525, 2912], "3190": [2858, 2060, 2310, 2928, 2485, 846, 920, 1144, 1761, 760, 2549, 2524, 2479, 83, 139, 2362, 1762, 2501, 2424, 2737, 1028, 751], "6329": [1449, 911, 1832, 861, 1974, 653, 920, 1144, 1761, 760, 1656, 2732, 1195, 2153, 69, 139, 569, 2168, 2579, 2362, 608, 704, 440, 276, 2424, 2737, 1854, 1147, 1525, 763, 1876], "6363": [2846, 2918, 1636, 861, 152, 1085, 920, 224, 810, 2101, 1607, 2549, 2524, 86, 205, 928, 569, 83, 2362, 3085, 276, 2501, 768, 1530, 1028, 1268, 1505], "157": [2248, 216, 2354, 861, 3145, 2063, 920, 1907, 1612, 2327], "7325": [2248, 2918, 591, 1725, 846, 1648, 48, 1436, 920, 1907, 1612, 2327, 569, 3044, 2362], "1722": [2554, 476, 1254, 1412, 861, 213, 1649, 920, 224, 810, 545, 2385, 2936, 139, 569, 460, 1087, 2790, 3044, 2661], "4436": [2347, 2465, 1592, 339, 861, 2484, 48, 920, 224, 3097, 1025, 2549, 2524, 2479, 635, 1387, 83, 1762, 2501, 751], "2157": [1948, 3152, 2984, 653, 811, 2928, 920, 224, 810, 2204, 2709, 635, 768, 2424, 2737, 2889], "9376": [2347, 619, 905, 861, 187, 1047, 920, 224, 810, 464, 2645], "2172": [1550, 2142, 541, 861, 2089, 691, 2814, 119, 1644, 2208, 2990, 1231, 859, 1570, 1608, 2737, 2153, 1548, 257, 569, 2362, 802, 2424, 1113, 1431, 2130, 1195, 1387, 2962, 139, 2168, 855, 704, 276, 2724], "5267": [454, 2446, 861, 1955, 1085, 920, 224, 810, 2204, 1656, 1764, 533, 139, 569, 276, 1245, 3044, 802, 2737, 2424], "9423": [308, 712, 653, 1304, 1174, 920, 224, 810, 1428, 2549, 2524, 1075, 2912, 635, 83, 569, 2061, 276, 2645, 2723, 2424, 2737, 2501, 1276, 1505], "2096": [2858, 166, 2932, 653, 2243, 2282, 920, 224, 3097, 1889, 111, 569, 802, 2362], "3572": [839, 3152, 580, 1423, 861, 621, 757, 920, 224, 3097, 2767, 1764, 1342, 569, 2362, 2638, 318, 1245, 2424, 2737, 1028, 2184, 3057], "4006": [3048, 378, 1081, 653, 1944, 1085, 920, 224, 3097, 706, 1968, 1195, 1108, 3061, 3054, 803, 276, 2645, 436, 502], "7239": [308, 964, 2650, 2323, 1963, 861, 920, 224, 3097, 706, 2549, 2524, 1968, 3061, 2153, 83, 2168, 859, 1570, 2501, 2424, 2737], "4661": [1951, 2770, 1902, 559, 846, 3121, 757, 920, 224, 3097, 706, 2732, 2912, 929, 635, 704, 69, 1525], "2666": [2248, 433, 2223, 653, 1304, 757, 920, 224, 810, 1369, 407, 2534, 1195, 2384, 822, 584, 2362, 1228, 2078, 276, 1147, 2728, 946, 3057, 440], "6309": [2846, 3152, 2223, 846, 2410, 757, 920, 224, 2867, 2920, 1108, 1895, 3061, 2737, 2153, 1656, 3054, 569, 2656, 2362, 1245, 2424, 802, 1123, 751, 1195, 139, 2168, 803, 276, 502, 763, 2178, 1968, 1764, 2936, 2384, 2902, 608, 436], "8069": [1234, 3152, 2, 1853, 861, 231, 2063, 920, 224, 3097, 400, 588, 1656, 569, 1796, 2914, 1213], "9190": [2598, 378, 964, 1553, 653, 2243, 2282, 920, 224, 3097, 706, 1074, 2015, 1013, 2760, 2153, 2737, 1481, 1876, 257, 1606, 929, 2912, 569, 2362, 1113, 2424, 2409, 69, 1525, 2534, 2168, 704, 276, 1839, 2384, 430, 2545, 821], "3187": [1951, 421, 1540, 861, 2611, 1085, 920, 224, 810, 2204, 1391, 2912, 1013, 1645, 569, 2764, 2409, 318, 2645, 1431, 2424, 2737, 1548, 276, 3088, 1147, 1525, 2184, 440], "5689": [2248, 2446, 2928, 2145, 653, 920, 224, 3097, 1025, 1108, 1764, 2912, 3054, 569, 803, 1245, 2424, 436, 2737, 502, 1525], "1918": [308, 3152, 3047, 103, 403, 3084, 664, 2928, 1605, 920, 1907, 1612, 2327, 2960, 569, 2168, 1147, 2645, 2153, 3019, 440], "2921": [1521, 1222, 1622, 1361, 861, 736, 2323, 920, 224, 3097, 2510, 2661, 1391, 635, 2384, 2409, 1147, 1525, 440], "6348": [308, 3152, 1053, 78, 48, 1939, 2063, 920, 224, 3097, 1997, 569, 3149, 2362, 2068, 3044, 1525, 440], "6162": [2347, 2464, 490, 653, 511, 2330, 2814, 119, 1644, 2549, 2524, 1195, 2737, 1606, 2015, 83, 569, 139, 2168, 2362, 276, 802, 2424, 1839, 2153, 2501, 1525, 1481], "296": [1640, 509, 339, 653, 2313, 861, 920, 224, 810, 1656, 1108, 1699, 3054, 2384, 803, 436, 802, 2424, 2737, 502, 751], "3677": [454, 1417, 861, 213, 1085, 920, 224, 3097, 706, 326, 1391, 2936, 2384, 440, 2424, 2737, 3108, 2676, 1147, 2661], "379": [1199, 1417, 1902, 2251, 861, 2484, 48, 920, 224, 3097, 706, 588, 257, 569, 2384, 1796, 276, 1213], "5334": [515, 294, 1047, 555, 861, 920, 224, 3097, 706, 2912, 855, 569, 704, 2645, 1431, 1525], "5291": [1521, 1191, 865, 796, 2323, 408, 846, 920, 224, 810, 970, 2549, 2524, 2709, 929, 635, 83, 2501, 2645, 2914, 3044, 821, 69], "7577": [438, 1222, 2024, 2928, 2485, 1649, 920, 224, 3097, 2510, 1195, 2645, 1113, 2362], "4455": [1234, 3152, 2281, 772, 861, 213, 1649, 920, 224, 3097, 1889, 139, 859, 828, 608, 1570, 3044, 1147, 440], "1960": [3040, 2446, 1047, 1649, 920, 224, 810, 918, 1968, 1108, 3061, 139, 3054, 803, 276, 436, 2424, 2737, 1548, 502], "9032": [3040, 1222, 1901, 1741, 653, 1304, 1174, 920, 224, 810, 2204, 588, 1968, 257, 1387, 635, 3061, 3054, 2902, 2362, 1796, 436, 2409, 1213, 1028, 2661], "3896": [2248, 2464, 964, 2809, 861, 152, 846, 920, 224, 3097, 400, 1548, 569], "3524": [1951, 3152, 630, 861, 2484, 1649, 920, 224, 3097, 706, 2549, 2524, 257, 2912, 83, 2168, 2362, 1992, 276, 2501, 2664, 768, 1525, 2130], "3973": [2069, 1535, 2346, 653, 1304, 2282, 920, 224, 3097, 2767, 2549, 2524, 83, 2501, 2424, 2737, 1028, 1147, 2734], "1997": [2554, 2464, 1540, 2928, 473, 2063, 920, 224, 3097, 2767, 588, 1764, 257, 929, 395, 569, 3161, 704, 1796, 1245, 1213, 69], "2169": [1234, 3152, 1254, 310, 861, 213, 757, 920, 224, 810, 1102, 1391, 1109, 859, 828, 1570, 157, 2661, 257, 2912, 569, 2409, 1525, 1796, 276, 2079, 440, 588, 2936, 2384, 608, 1213, 1147], "8593": [1550, 1079, 2663, 2323, 725, 1649, 920, 1907, 1612, 2327, 1656, 1864, 1156, 822, 2728, 2677, 1689], "2191": [454, 2864, 2486, 2323, 596, 2928, 920, 224, 3097, 329, 569, 768, 751], "3331": [839, 166, 2927, 2323, 1963, 1174, 2814, 119, 451, 957, 2549, 2524, 83, 1362, 2501, 2645, 2424, 276, 2737, 390], "8390": [2665, 216, 3047, 989, 861, 960, 846, 716, 920, 1907, 1612, 2327, 1391, 569, 2384, 3044, 1147, 440], "2969": [2598, 1535, 1513, 1047, 3127, 2063, 920, 224, 3097, 400, 2960, 1342, 569, 608, 2638, 276, 2645, 2424, 2737, 3019], "8233": [1051, 1191, 2831, 653, 210, 48, 920, 224, 810, 553, 1656, 1431], "1438": [438, 1417, 2927, 2850, 2323, 2070, 1085, 920, 224, 3097, 706, 1764, 929, 2936, 635, 139, 569, 2384, 1912, 704, 318, 1245, 2424, 768, 2737, 69, 1525, 2184, 3057], "4010": [3048, 2060, 1636, 861, 468, 3164, 920, 224, 3097, 706, 139, 802, 2424, 2737, 1295, 3057], "8667": [308, 1902, 861, 152, 1085, 920, 224, 3097, 706, 1656, 139, 2661, 802, 2936], "6387": [1951, 165, 499, 861, 152, 861, 920, 224, 3097, 2009, 635, 326, 2676, 1876], "9074": [3040, 2446, 1466, 1060, 861, 231, 653, 920, 1907, 1612, 2327, 2549, 2524, 1195, 83, 2362, 2501], "4571": [2248, 2446, 653, 2119, 846, 920, 224, 3097, 139, 2362, 2645, 2424, 2737, 1147, 2366], "6100": [670, 1191, 1036, 861, 1709, 2063, 920, 224, 3097, 706, 739, 139, 2645, 2319], "6581": [89, 1535, 450, 861, 2433, 2928, 920, 224, 3097, 2510, 1195, 1108, 929, 569, 2362, 704, 2728, 69], "7773": [1550, 1618, 371, 236, 846, 410, 48, 920, 224, 810, 464, 1074, 2153, 569, 2168, 430, 2760, 2424, 2737, 946], "2561": [1948, 421, 1492, 844, 1047, 2690, 653, 240, 920, 1144, 1761, 760, 2549, 2524, 83, 569, 276, 2645, 2501, 2424, 2737], "8731": [1951, 1565, 1538, 2323, 1963, 1085, 920, 224, 810, 2101, 1607, 588, 1075, 1391, 257, 928, 569, 2061, 2384, 1530, 1796, 276, 1113, 2424, 2737, 1213, 1147, 440], "864": [2665, 509, 516, 653, 1569, 2063, 920, 1907, 1612, 2327, 1656, 2014, 2936, 2912, 569, 2168, 2384, 883, 2362, 440, 2638, 1839, 1975, 2153, 3088, 1147, 1525, 2233, 156], "7501": [2598, 1417, 1779, 861, 1047, 1458, 920, 1907, 2185, 1043, 2062, 1525, 768, 2362], "7010": [2846, 2060, 2334, 653, 1304, 2063, 920, 224, 810, 1369, 588, 257, 1013, 2764, 1796, 1213, 2631], "7302": [308, 3152, 2927, 2240, 653, 1304, 3023, 920, 224, 3097, 706, 2960, 2936, 2384, 276, 768, 3019, 1525], "3935": [1640, 3152, 17, 842, 349, 1221, 2323, 920, 1144, 1761, 760, 588, 257, 2912, 2130, 855, 569, 608, 704, 1796, 2645, 1431, 1213, 1525, 3057], "7762": [839, 294, 707, 2323, 676, 48, 920, 1144, 1761, 760, 588, 2524, 1656, 2549, 257, 83, 1796, 2501, 2645, 2424, 2737, 1213, 2734], "4596": [1521, 1079, 2256, 13, 989, 846, 2639, 3164, 2740, 920, 1144, 1761, 760], "6756": [2069, 433, 1636, 2323, 676, 2928, 920, 224, 3097, 706, 977, 1391, 139, 569, 2384, 2501, 2424, 2737, 1147, 440], "8329": [1726, 1222, 2223, 861, 213, 653, 920, 224, 3097, 706, 635, 569, 3050, 608, 440], "6707": [2248, 3152, 51, 1451, 507, 653, 1862, 846, 275, 920, 1907, 1612, 2327, 569, 2645, 608, 1387], "6411": [2554, 378, 2927, 2294, 861, 1085, 920, 224, 810, 2201, 635, 569, 2645, 276], "4850": [2248, 2060, 352, 2323, 2816, 846, 920, 224, 3097, 1025, 1607, 1968, 2737, 3061, 751, 928, 569, 139, 2384, 1732, 2914, 2424, 1530, 1505], "193": [1234, 3152, 2346, 2928, 1659, 1085, 920, 224, 3097, 706, 1656, 2912, 2936, 1013, 1843, 569, 855, 1599, 2764, 2384, 276, 2153, 2228, 1525, 2679, 440], "5301": [1948, 630, 653, 2668, 861, 920, 224, 3097, 400, 1656, 257, 139, 569, 2168, 1856, 2579, 2362, 608, 704, 802, 2153, 1147, 1525, 1481, 2130], "3686": [839, 2446, 937, 300, 861, 44, 2063, 920, 1907, 1612, 2327, 257, 276, 2677, 1147, 2130, 440], "5246": [670, 1713, 1937, 2928, 1659, 3164, 920, 224, 3097, 706, 1656, 2549, 2524, 83, 569, 276, 2501, 2424, 768, 2737, 1548, 1147, 1525, 440], "8146": [1521, 1079, 2052, 2928, 2055, 2323, 920, 224, 3097, 2510, 1607, 1968, 1108, 2479, 3061, 928, 3054, 569, 803, 1530, 1762, 436, 2645, 2424, 2737, 502], "4016": [3048, 2465, 1936, 1047, 3072, 1649, 920, 1907, 2185, 2793, 1074, 1656, 1223, 569, 430, 822, 2760, 276, 3044, 2728, 778, 2335, 1876], "9261": [1726, 1713, 583, 861, 621, 2282, 920, 224, 3097, 706, 139], "4916": [1550, 1191, 9, 861, 1320, 3164, 920, 224, 3097, 706, 1656, 588, 1764, 257, 1213, 569, 1362, 2265, 1796, 318, 2645, 2914, 1245, 2737, 3044, 1113, 2424, 3143, 2184, 2285, 390], "1159": [1726, 2465, 386, 1047, 846, 920, 224, 3097, 400, 1074, 257, 430, 2760, 2645, 2424, 768, 2737, 3057], "7892": [438, 1222, 1937, 653, 2668, 846, 920, 224, 3097, 706, 2549, 2524, 1108, 2912, 1525, 2502, 83, 3054, 803, 276, 2501, 2424, 436, 2737, 502, 486, 3057], "6440": [1199, 509, 357, 846, 45, 846, 920, 1907, 2185, 1043, 139, 569, 2168, 859, 2362, 1570, 802, 2153, 1525], "8641": [1948, 1867, 861, 2484, 653, 920, 224, 3097, 400, 2549, 2524, 1108, 83, 3054, 803, 2501, 2645, 436, 502, 1147, 1525, 751], "5430": [2554, 2465, 1348, 653, 359, 861, 920, 1144, 1761, 760, 257, 929, 704, 69, 2130, 440], "3635": [2858, 433, 629, 1047, 861, 920, 224, 3097, 706, 1968, 2912, 3061, 569, 2384, 802, 2424, 2645, 2737, 1525], "2056": [454, 476, 2801, 2928, 461, 1649, 920, 224, 810, 1102, 2990, 1074, 928, 1231, 859, 2760, 1570, 2737, 1530, 1028, 3057, 717, 2912, 257, 929, 569, 2362, 2424, 1113, 2409, 69, 1525, 1607, 2735, 276, 1796, 588, 430, 768, 1213, 2734], "8297": [454, 294, 2984, 861, 1320, 2282, 920, 224, 3097, 706, 2534, 2617, 569, 2384, 859, 1570, 286], "1932": [308, 3152, 29, 1331, 861, 152, 846, 920, 224, 3097, 706, 2479, 635, 3054, 2902, 1762, 436, 2424, 2737, 946], "8987": [670, 166, 2223, 861, 2845, 758, 2814, 119, 1644, 2753, 1147, 569, 2645, 276, 2936], "9187": [438, 2918, 2975, 861, 2845, 758, 2814, 119, 1644, 2208, 2549, 2524, 1968, 1108, 2479, 3061, 83, 3054, 1362, 569, 803, 390, 1762, 2501, 436, 502, 3057, 440], "6035": [1234, 3152, 937, 2928, 405, 1085, 920, 1907, 1612, 2327, 3019, 569, 2384, 2168, 276], "5558": [2347, 221, 3102, 653, 210, 2323, 920, 224, 3097, 2363, 2409], "6096": [1521, 1565, 1172, 2171, 861, 2845, 2330, 2814, 119, 1644, 1370, 1548, 276, 2384, 2645, 2936], "8684": [308, 3152, 2761, 844, 861, 1114, 3164, 920, 1144, 1761, 760, 2549, 2524, 1656, 2936, 83, 569, 2384, 2501, 2645, 751], "978": [2069, 1535, 964, 653, 2243, 861, 920, 224, 3097, 1025, 588, 257, 1387, 635, 139, 2362, 1796, 276, 2645, 802, 2409, 1213], "3326": [515, 294, 2223, 653, 1304, 1174, 2814, 119, 451, 124, 1108, 1764, 2912, 929, 2936, 928, 569, 139, 2384, 2362, 318, 1245, 2424, 276, 2737, 2677, 69, 1525, 2184, 751, 2661], "6737": [3048, 1079, 1636, 653, 2103, 48, 920, 224, 3097, 1997, 1764, 855, 569, 704, 1245, 821, 2645, 2737, 2424, 1431, 1505], "8560": [1133, 2060, 861, 2433, 48, 920, 1144, 1761, 760, 2962, 139, 2168, 569, 1608, 821, 2153, 3057, 440], "463": [1051, 216, 591, 2317, 3109, 861, 142, 48, 2882, 920, 1144, 1761, 760, 326, 2534, 1764, 569, 2384, 1245, 2424, 2737, 1548, 2676, 763], "8630": [839, 1535, 2975, 861, 1955, 1281, 2814, 119, 451, 1134, 1993, 1895, 1013, 383, 2645, 2737, 2341, 569, 3054, 2764, 2362, 2656, 2424, 139, 276, 1066, 2839, 465, 2178, 2936, 635, 2384, 608, 436], "7394": [3048, 378, 2121, 653, 210, 1085, 920, 224, 3097, 400, 2990, 1656, 139, 1231, 2478, 318, 276, 1113, 2184], "8344": [454, 1222, 322, 653, 2668, 861, 920, 224, 3097, 1889, 1147, 1387], "9437": [839, 1191, 29, 861, 621, 1649, 920, 224, 3097, 706, 2962, 635, 1479, 2362, 1608, 821, 276, 1028, 3057, 440], "7786": [1948, 3152, 1047, 2844, 846, 920, 224, 810, 3030, 2549, 2524, 1387, 83, 2501, 2645, 2424, 2737], "7934": [1550, 1618, 1540, 653, 1304, 2928, 920, 224, 3097, 2767, 588, 257, 2479, 1762, 1796, 318, 2645, 1213, 2184], "9067": [1234, 3152, 413, 2323, 2298, 48, 920, 224, 3097, 2510, 318, 2184, 1606, 1505], "3215": [1234, 3152, 964, 653, 2243, 861, 920, 224, 3097, 706, 139, 569, 1912, 2424, 2737, 1548, 1525], "6039": [1234, 3152, 352, 2866, 3084, 971, 3164, 920, 224, 3097, 706, 2549, 2524, 1108, 83, 3054, 1362, 803, 2501, 2645, 2424, 436, 2737, 502, 763, 751, 390], "3282": [2598, 221, 193, 1998, 653, 2668, 1047, 920, 224, 3097, 329, 588, 1656, 257, 1796, 276, 2645, 2424, 802, 2737, 1213], "8535": [1640, 1191, 640, 1999, 861, 2484, 2323, 920, 1144, 1761, 760, 588, 257, 2912, 569, 2362, 1796, 276, 768, 1213, 1028, 1525], "9218": [1234, 3152, 964, 653, 511, 2282, 920, 224, 3097, 1997, 1013, 2645, 486, 569, 2764, 1113, 1431, 946, 1525, 751, 2962, 527, 83, 139, 2061, 855, 704, 2549, 2524, 2502, 2936, 635, 2501, 1147], "8897": [1550, 2060, 1636, 2928, 1659, 1649, 920, 224, 3097, 2510, 1607, 1505, 928, 569, 1530, 276, 2645, 2424, 2737, 1548, 3057], "2486": [2598, 2465, 2663, 846, 673, 2282, 920, 1907, 2185, 1043, 2479, 1013, 2168, 2764, 1762, 3019], "9291": [2069, 509, 2928, 2198, 2928, 920, 224, 810, 553, 1548, 1028, 3044, 2362], "5764": [1234, 3152, 829, 1551, 2323, 2704, 846, 920, 224, 3097, 2510, 2549, 2524, 83, 569, 2501, 2645, 1548, 1147], "6671": [2347, 433, 2223, 653, 2331, 3023, 920, 224, 810, 2204, 2723, 2737, 2153, 257, 2362, 2424, 1431, 751, 1195, 1387, 139, 2168, 855, 704, 1796, 588, 635, 2724, 821, 768, 1213, 3057], "2848": [1449, 2770, 1540, 846, 1687, 757, 920, 224, 2867, 1533, 1075, 569, 2061, 276], "1928": [2605, 476, 2801, 2515, 653, 1304, 1649, 920, 224, 810, 18, 1968, 1108, 2709, 2912, 3061, 3054, 803, 436, 2424, 2737, 1548, 502, 1525], "2552": [1948, 1565, 1081, 2928, 1659, 48, 920, 224, 3097, 1408, 2549, 2524, 2936, 83, 2384, 2501, 2645], "1510": [2605, 509, 2928, 2600, 846, 920, 224, 3097, 2510, 2549, 2524, 83, 859, 1570, 2501, 2645, 2677], "866": [1726, 2864, 964, 861, 152, 48, 920, 224, 3097, 706, 2549, 2524, 83, 569, 2362, 2501, 2424, 2737, 1028, 1147, 751], "2163": [515, 1222, 2430, 2024, 861, 1974, 3084, 920, 1144, 1761, 760, 1108, 1387, 635, 139, 3054, 803, 436, 802, 2645, 502], "6735": [89, 2465, 861, 1320, 1649, 920, 224, 810, 2204, 2912, 635, 569, 2645, 1525, 440], "581": [1951, 3152, 516, 2928, 2063, 920, 1907, 1612, 2327, 635, 111, 276, 2409, 2677, 2661], "2142": [2352, 1713, 322, 1047, 3127, 2063, 920, 224, 3097, 400, 276, 802, 768, 3057], "7699": [1951, 421, 1095, 2094, 2928, 1661, 2928, 920, 224, 3097, 329, 2549, 2524, 929, 2936, 635, 1645, 83, 2384, 2362, 2501, 2645, 69], "3652": [454, 1079, 1622, 313, 2928, 1679, 2662, 2063, 920, 1907, 1612, 2327, 1876, 2549, 2524, 588, 257, 83, 569, 139, 1912, 2168, 2362, 996, 1796, 2501, 2645, 2153, 1213, 69, 1525, 2661], "6414": [308, 3152, 964, 2148, 861, 152, 3164, 920, 224, 3097, 1889, 588, 257, 1213, 2362, 1796, 802, 1295, 3057], "8110": [2554, 2465, 2223, 861, 152, 1174, 2814, 119, 451, 124, 1013, 276, 2645, 2764, 1147], "5294": [1121, 1618, 2481, 846, 759, 2282, 920, 1907, 1612, 2327, 139, 3054, 2902, 608, 2362, 436, 1525], "290": [308, 289, 2323, 2205, 2063, 920, 224, 3097, 400, 2479, 635, 1447, 1762, 719, 276, 841], "6889": [1521, 1079, 964, 653, 2668, 1649, 920, 224, 3097, 706, 1607, 1968, 1342, 635, 3061, 928, 569, 2384, 2638, 276, 1530], "8688": [89, 378, 642, 2097, 507, 2928, 813, 846, 241, 920, 1907, 1612, 2327, 517, 569], "4803": [308, 3152, 2801, 653, 2243, 1649, 920, 224, 810, 2204, 1607, 2549, 2524, 751, 928, 569, 83, 2384, 2362, 1530, 2501, 2424, 2737, 1028, 1505], "2295": [2665, 2060, 180, 861, 213, 3164, 920, 224, 810, 3142, 588, 1108, 257, 2709, 1213, 928, 3054, 803, 1796, 2645, 2424, 436, 2737, 502], "7507": [438, 476, 2687, 1322, 861, 960, 2063, 920, 1144, 1761, 760, 2549, 2524, 1656, 83, 139, 2384, 2501, 2424, 2737], "6975": [2665, 1222, 29, 653, 1225, 861, 920, 224, 3097, 706, 2549, 2524, 588, 1764, 257, 2660, 1013, 928, 569, 83, 2764, 855, 704, 1796, 2501, 1245, 1431, 768, 1213, 1509], "5277": [308, 1487, 1047, 891, 846, 920, 224, 3097, 400, 2549, 2524, 2660, 1342, 83, 2638, 2501, 1505], "6512": [2605, 2446, 964, 653, 1304, 1649, 920, 224, 3097, 1889, 1607, 928, 569, 2362, 3051, 276, 3044, 1530, 1028, 1147], "9330": [2665, 2770, 1106, 2928, 2485, 653, 920, 224, 3097, 2510, 1074, 11, 1391, 1764, 257, 2912, 2660, 569, 3054, 430, 2760, 2645, 1245, 436, 768, 1147, 1525, 751, 440], "2909": [1951, 3152, 1540, 861, 2484, 653, 920, 224, 393, 2512, 3054, 2902, 608, 2362, 436, 69, 1876], "6698": [1234, 3152, 1350, 2781, 861, 2484, 3164, 920, 224, 3097, 329, 1391, 821, 2645, 1028, 1147, 440], "1035": [2069, 1222, 1238, 653, 210, 861, 920, 224, 3097, 1025, 588, 1108, 257, 502, 139, 569, 3054, 803, 1796, 436, 1213], "8794": [1640, 433, 1540, 2930, 653, 2243, 2282, 920, 224, 3097, 2767, 2424, 1505, 2737], "6540": [2665, 684, 2223, 3029, 861, 1621, 757, 920, 224, 810, 464, 3105, 1195, 2677, 2384, 2362], "2729": [515, 1222, 1254, 2114, 653, 1403, 653, 920, 224, 810, 1102, 1108, 3054, 803, 1228, 584, 436, 502], "8104": [2665, 509, 2927, 1911, 861, 2845, 48, 920, 224, 810, 464, 821, 276, 1362, 2645, 390], "6584": [2605, 2465, 790, 846, 1389, 1649, 920, 224, 3097, 1025, 1895, 2936, 635, 3054, 2384, 2656, 276, 2645, 436, 2409, 1525, 2178], "4408": [2248, 2465, 1902, 2928, 473, 2003, 920, 224, 3097, 706, 1607, 2737, 928, 569, 2384, 2168, 1530, 276, 2424, 2153], "2695": [2598, 2060, 1081, 3084, 2492, 653, 920, 224, 3097, 706, 1607, 588, 257, 928, 569, 3054, 2902, 859, 828, 1295, 1570, 1796, 276, 436, 1530, 1213, 1525], "8777": [839, 2918, 1902, 1177, 653, 2668, 1085, 920, 224, 3097, 706, 2734, 2384, 318, 2424, 3044, 2737, 1147, 2184, 3057, 440], "4963": [2069, 2918, 955, 861, 2611, 1174, 2814, 119, 451, 1134, 1075, 1108, 1342, 635, 3054, 2061, 803, 2638, 276, 436, 2424, 2645, 2737, 502], "5640": [89, 221, 964, 2650, 653, 2243, 48, 920, 224, 3097, 400, 1607, 1108, 929, 1387, 527, 928, 569, 3054, 803, 704, 2645, 436, 1530, 502, 69, 3057], "7816": [1726, 294, 2323, 676, 653, 920, 224, 3097, 400, 2549, 2524, 257, 395, 83, 3161, 2501, 2645, 2424, 2737, 2130], "5052": [1133, 378, 794, 861, 2484, 48, 920, 224, 3097, 1889, 569], "7728": [1234, 3152, 29, 2928, 473, 653, 920, 224, 3097, 706, 2549, 2524, 1656, 83, 2362, 2501, 2645, 1028], "8601": [1521, 421, 29, 1360, 846, 252, 1649, 920, 224, 3097, 329, 1052], "5902": [1449, 1191, 2133, 2928, 2145, 3164, 920, 224, 3097, 400, 1342, 704, 2638, 276, 2424, 768, 2737, 1505], "6366": [839, 2060, 541, 861, 213, 1281, 2814, 119, 1644, 2208, 2549, 2524, 1387, 2936, 83, 1362, 2724, 390, 276, 2501, 2424, 2737, 1147, 751, 2661], "7268": [515, 1222, 1622, 3133, 861, 1974, 1649, 920, 224, 3097, 2009, 1108, 1895, 1387, 139, 3054, 803, 2362, 2656, 2724, 276, 2645, 436, 502, 1147, 2178], "6255": [1521, 1222, 2804, 2887, 2928, 131, 1649, 920, 224, 3097, 1889, 3054, 569, 2902, 608, 821, 3044, 2424, 2737, 436], "5582": [1726, 2864, 1538, 2928, 80, 3164, 920, 224, 810, 1031, 1656, 2534, 2384, 2424, 2737, 440], "8449": [1234, 3152, 2334, 2928, 131, 3023, 920, 224, 3097, 2333, 588, 1195, 257, 569, 2384, 859, 2362, 704, 1570, 1796, 276, 2725, 1213, 3057], "5238": [1051, 433, 516, 2323, 1776, 2063, 920, 1907, 2185, 1496, 635, 1013, 2764, 318, 2424, 2737, 2184], "5370": [1051, 509, 217, 861, 152, 3023, 920, 224, 810, 3142, 2350, 928, 2737, 1028, 2661, 1656, 257, 1146, 3054, 569, 2362, 802, 2424, 1525, 2130, 1745, 2283, 139, 1796, 588, 2936, 2902, 3092, 436, 1213, 1147, 2734], "5990": [1121, 1618, 2080, 512, 861, 152, 846, 920, 224, 3097, 706, 2534, 1391, 718, 635, 569, 3054, 2384, 853, 2362, 2902, 608, 3104, 440, 436, 2664, 1147, 1668, 2661], "2074": [308, 29, 1310, 861, 152, 1085, 920, 224, 3097, 706, 2549, 2524, 83, 2501, 1711], "9157": [1234, 3152, 580, 653, 2243, 2063, 920, 224, 3097, 706, 2936, 569, 2384, 276, 2645, 1548], "8698": [1640, 619, 653, 1304, 1085, 920, 224, 810, 2204, 2912, 635, 3130, 276, 2645, 1525], "4230": [308, 1129, 653, 210, 2063, 920, 224, 3097, 706, 1147, 704, 2936, 440], "9368": [1951, 421, 861, 152, 349, 920, 224, 2798, 2147, 69, 440, 1391, 1147], "8281": [1234, 3152, 964, 2928, 1659, 2928, 920, 224, 3097, 706, 1147, 569, 2645, 608, 276], "560": [1951, 2770, 1540, 559, 846, 3121, 861, 920, 224, 810, 1102, 1656, 2936, 2384, 318, 2684, 2839, 2184], "8683": [438, 911, 1636, 861, 152, 3164, 920, 224, 3097, 400, 1656, 2534, 2479, 569, 2384, 608, 1762, 2645, 2424, 3044, 2737, 946, 3057], "2358": [515, 1222, 2173, 3084, 2422, 2928, 920, 224, 3097, 1025, 2990, 2524, 1195, 2549, 83, 1231, 2362, 2501, 2645, 2424, 1113, 2737, 440], "4138": [1640, 3152, 180, 337, 861, 152, 2282, 920, 224, 3097, 706, 2549, 739, 2524, 2660, 395, 83, 2629, 1147, 3161, 276, 2501, 183, 946, 440], "4288": [2605, 2446, 371, 861, 3145, 2063, 920, 224, 3097, 400, 2612, 1195, 1764, 2479, 2406, 569, 1762, 276, 1245, 2645, 2424, 2737, 3044, 2677], "72": [308, 3152, 2346, 861, 152, 653, 920, 224, 3097, 1889, 928, 2384, 2362, 3051, 2424, 3044, 2737, 768, 1028, 3057], "586": [1550, 2770, 2903, 861, 489, 1777, 2814, 119, 451, 124, 2479, 1599, 2737, 2153, 1028, 1876, 257, 569, 318, 1245, 2424, 69, 2184, 533, 139, 1796, 276, 2228, 588, 1764, 1762, 1213, 1147, 2734], "3771": [1550, 2142, 2223, 861, 213, 1777, 2814, 119, 451, 124, 1108, 1391, 2015, 1147, 2664, 2153, 2233, 2023, 2960, 257, 1559, 3054, 569, 2362, 1613, 3044, 2424, 69, 2732, 1864, 1195, 527, 139, 2168, 803, 3161, 1796, 276, 1839, 502, 440, 588, 395, 2384, 883, 608, 436, 768, 1213, 3019], "4801": [2069, 1417, 1902, 2323, 676, 2063, 920, 224, 3097, 706, 2153, 2168, 276, 2424, 2737, 440], "177": [2846, 1713, 472, 653, 1304, 2919, 2814, 119, 1644, 2208, 2990, 1231, 859, 1570, 2153, 2737, 1548, 1656, 257, 2912, 1524, 318, 1113, 2424, 3044, 1525, 2184, 139, 2168, 1796, 276, 588, 2545, 1213, 1147], "6793": [1726, 2770, 2927, 2315, 653, 2668, 3023, 920, 224, 3097, 706, 3051, 1147, 2384, 3044, 440], "172": [1550, 2770, 794, 861, 489, 1649, 920, 224, 810, 3142, 1525, 802, 3044, 2478], "8089": [1521, 1222, 374, 2393, 846, 673, 48, 920, 224, 3097, 2510, 1074, 257, 569, 2384, 430, 2362, 2760, 440], "4358": [1133, 509, 2121, 861, 231, 3164, 920, 1907, 1612, 2327, 1548, 2409, 2424, 751, 2737], "9438": [2605, 1535, 1540, 846, 759, 3164, 920, 224, 810, 602, 257, 139, 569, 2362, 704, 1113, 1147, 1525, 2130, 2661], "5422": [1234, 3152, 1902, 653, 2243, 48, 920, 224, 3097, 1889, 2534, 2168, 2384, 2362, 1147, 440], "1225": [1121, 378, 630, 2323, 676, 846, 920, 224, 3097, 400, 1607, 2737, 928, 569, 276, 821, 2424, 1530, 2734], "6197": [1449, 216, 2140, 861, 2611, 2330, 2814, 119, 1644, 2208], "2873": [1521, 3152, 2121, 861, 152, 1085, 920, 1907, 1612, 795, 588, 1391, 1108, 257, 2936, 1213, 3054, 569, 2384, 803, 608, 1796, 436, 2424, 2737, 502, 1147, 440], "2027": [670, 1618, 2354, 653, 210, 653, 920, 1144, 1761, 760, 1895, 2962, 635, 3054, 2656, 318, 1608, 3044, 436, 2184, 2178], "3419": [454, 509, 3077, 846, 673, 48, 920, 224, 3097, 400, 2645], "9199": [1521, 3152, 51, 1316, 1469, 861, 960, 115, 846, 241, 920, 1907, 1612, 2327, 2549, 2524, 83, 2501, 1147, 2734, 440], "373": [1554, 2060, 591, 1354, 2928, 2496, 2928, 2811, 920, 1144, 1761, 760, 1656, 2737, 1764, 2912, 635, 569, 2168, 608, 2362, 2645, 1245, 2424, 2153, 1525], "813": [515, 1943, 480, 861, 2484, 2063, 920, 224, 3097, 400, 2549, 2524, 635, 2962, 83, 2501, 1608, 276, 440], "3192": [2347, 226, 653, 2668, 861, 920, 224, 810, 2204, 2549, 2524, 83, 139, 2362, 2501, 802, 2424, 2645, 2737, 751], "3549": [1948, 421, 441, 861, 152, 2928, 920, 224, 3097, 400, 2534, 2384, 704, 276, 802, 2424, 2645, 2737], "9226": [1234, 3152, 2778, 846, 759, 1085, 920, 224, 3097, 329, 2534, 257, 929, 395, 321, 569, 2168, 2384, 704, 2126, 276, 2153, 1986, 69, 1481, 2130], "6206": [194, 911, 1832, 861, 1564, 3164, 920, 224, 2798, 606, 527, 395, 139, 1147, 3161, 1295, 946, 3057], "2725": [1640, 2918, 1053, 861, 2484, 757, 920, 224, 3097, 1001, 2479, 139, 3054, 2902, 2478, 1762, 436, 3044, 1157, 1525], "384": [1234, 3152, 29, 653, 2668, 846, 920, 224, 3097, 706, 2549, 2524, 1195, 1108, 2502, 83, 3054, 803, 2501, 436, 276, 2645, 502, 1147, 486], "771": [454, 2142, 2872, 798, 48, 372, 48, 920, 224, 810, 1161, 139, 569, 2362, 704, 2645, 1525], "5853": [1951, 2770, 955, 653, 1403, 3023, 920, 224, 3097, 1889, 588, 257, 635, 1796, 276, 821, 1548, 1213], "1528": [1051, 2770, 1037, 861, 2611, 2063, 920, 224, 810, 394, 569, 2384, 1525, 2912], "374": [2347, 911, 2801, 1445, 861, 152, 2282, 920, 224, 2867, 1391, 2661, 1656, 257, 2912, 569, 3054, 2362, 802, 3044, 2409, 1525, 2130, 1796, 440, 588, 2936, 2384, 2902, 608, 436, 1213, 1147], "955": [454, 1222, 1798, 1938, 2928, 2485, 3164, 920, 224, 3097, 1291, 440, 276, 1147], "8211": [1051, 619, 964, 861, 213, 3164, 920, 224, 810, 2204, 2153, 139, 2168, 2362, 2645, 2424, 2737, 1028, 1147], "9347": [1051, 476, 1053, 653, 2668, 2063, 920, 224, 3097, 400, 1656, 326, 929, 139, 569, 2362, 2676, 69, 1876], "6181": [1554, 294, 964, 653, 2243, 846, 920, 224, 810, 2201, 751, 1525, 3044, 2912], "2130": [2352, 166, 2848, 653, 2668, 861, 920, 224, 810, 394, 276, 2645], "7157": [1726, 509, 838, 2323, 3069, 2063, 920, 224, 810, 394, 276, 440], "5150": [194, 2864, 1902, 846, 3103, 1085, 920, 224, 3097, 1889, 3105, 1732, 2384, 2362], "3241": [1449, 433, 3077, 2323, 676, 653, 920, 224, 3097, 400, 1074, 276, 430, 2760], "1545": [2846, 476, 964, 653, 2668, 653, 920, 224, 3097, 400, 929, 569, 608, 859, 1570, 276, 2645, 69, 763], "8298": [2352, 2464, 1254, 846, 1687, 3164, 920, 224, 810, 2101, 1108, 2479, 1895, 859, 1570, 2153, 2737, 1028, 257, 3054, 569, 2362, 2656, 802, 2424, 1525, 751, 139, 2168, 803, 1796, 276, 502, 763, 2178, 440, 588, 2384, 2902, 1762, 436, 1213, 1147], "2609": [454, 294, 2066, 1171, 2928, 813, 48, 920, 1907, 1612, 2327, 139, 2661], "2572": [438, 294, 357, 861, 1974, 2323, 920, 1907, 2185, 1043, 2912, 1447, 3054, 569, 2902, 719, 436, 2409, 1525, 841], "9346": [1951, 1143, 1053, 653, 359, 2063, 920, 224, 3097, 400, 588, 1195, 257, 929, 1013, 569, 2764, 2362, 704, 1796, 2409, 1213, 69, 2661], "5835": [1550, 378, 897, 653, 600, 846, 920, 224, 3097, 706, 1607, 588, 1075, 257, 928, 569, 2061, 1796, 1530, 1213, 751], "4967": [1234, 3152, 1540, 1177, 861, 213, 2063, 920, 224, 3097, 706, 1548, 2645, 2424, 2737], "5806": [3040, 1618, 1937, 653, 2668, 2063, 920, 224, 3097, 706, 2710, 1764, 533, 635, 569, 2629, 2168, 1245, 2153, 2677], "5797": [1726, 433, 1081, 861, 2484, 1085, 920, 224, 810, 2204, 569, 3050, 768, 276], "7103": [1726, 1618, 2223, 861, 152, 846, 920, 224, 810, 2204, 2912, 635, 2362, 2424, 2737, 1028, 1525], "4037": [308, 3152, 5, 847, 2190, 507, 958, 820, 653, 181, 1138, 375, 861, 944, 920, 1144, 1761, 760, 2534, 3105, 3054, 2384, 2902, 2645, 436, 2409, 2661], "2363": [1051, 1618, 2801, 2157, 861, 489, 3023, 920, 224, 3097, 2642, 1656, 326, 2534, 569, 2384, 584, 1228, 1113, 2676], "3086": [2858, 476, 861, 2484, 48, 920, 224, 3097, 400, 2709, 569, 1362, 608, 390, 1113, 1525, 440], "7911": [2069, 378, 1636, 653, 2243, 3023, 920, 224, 3097, 706, 2936, 855, 2384, 704, 276, 1431, 2839], "3483": [308, 3152, 2099, 2928, 2485, 861, 920, 224, 3097, 706, 1656, 2384, 2362, 318, 276, 768, 1028, 2184], "3052": [454, 166, 955, 861, 425, 2282, 920, 224, 810, 1102, 635, 859, 1570, 821, 2424, 2737, 1147, 3057, 440], "1540": [1199, 1417, 964, 1721, 846, 1881, 2282, 920, 224, 810, 464, 588, 2612, 1108, 257, 635, 1213, 3054, 2902, 803, 2362, 3051, 1796, 436, 3044, 502, 1028, 1147], "3223": [1951, 1565, 333, 846, 3103, 1281, 2814, 119, 1644, 1198, 1606, 569, 2384, 2362, 768, 2409, 1525], "6549": [2665, 1535, 861, 1974, 3164, 920, 224, 810, 3142, 569, 1113, 2362], "1249": [2858, 378, 964, 2323, 2070, 846, 920, 224, 3097, 706, 2549, 2524, 1108, 1013, 928, 3054, 2895, 2764, 83, 803, 276, 2645, 2424, 2501, 2737, 436, 502], "80": [1948, 421, 58, 2323, 2070, 3164, 920, 224, 810, 2204, 717, 2502, 855, 704, 2735, 3044, 1431, 2737, 2424, 486, 751], "7216": [308, 3152, 2652, 861, 1955, 266, 2814, 119, 1644, 1850, 2549, 2524, 1387, 2153, 635, 83, 2168, 2724, 276, 2645, 2424, 2501, 2737, 1548, 768], "6306": [515, 221, 2223, 861, 213, 1649, 920, 224, 810, 2204, 1801, 2350, 929, 2960, 806, 635, 139, 3019, 2362, 3130, 276, 3092, 1548, 69, 1745], "503": [1951, 421, 1540, 861, 152, 1649, 920, 224, 810, 1102, 2549, 2524, 83, 569, 139, 608, 2501, 3044, 2424, 2737, 1431, 2341, 2734], "8758": [1234, 3152, 2300, 2695, 861, 1701, 846, 920, 224, 3097, 2510, 2732, 1391, 1606, 635, 2362, 1147, 802, 1028, 1854, 440], "4595": [1726, 476, 964, 861, 152, 2282, 920, 224, 3097, 706, 1656, 2168, 1525, 2153], "6219": [1133, 1417, 2099, 2928, 1659, 48, 920, 224, 3097, 1025, 966, 635, 139, 954, 853, 276, 2424, 2737], "6391": [670, 1535, 51, 1942, 507, 2928, 1679, 653, 1169, 920, 1907, 1612, 2327, 2990, 1895, 1231, 2362, 1113, 1147, 2178, 440], "8442": [2858, 2060, 1301, 1769, 653, 3039, 2063, 920, 224, 810, 553, 1764, 569, 318, 1245, 276, 1147, 2184, 440], "6349": [2846, 2142, 2223, 846, 2410, 2003, 920, 224, 810, 464, 635, 1689, 2168, 162, 2574, 2384, 2362, 704, 276, 2153, 1548, 69, 1876], "2115": [1554, 2060, 2354, 2323, 2298, 861, 920, 224, 3097, 400, 588, 2660, 569, 1431, 2728, 2661], "3028": [2598, 1079, 2927, 653, 1403, 1047, 920, 224, 3097, 706, 1108, 929, 3054, 803, 1147, 704, 802, 2645, 436, 502, 69], "4299": [2605, 226, 2334, 846, 2410, 3164, 920, 224, 810, 1369, 1656, 2962, 569, 859, 608, 3051, 1570, 821, 3044, 1608], "1917": [1234, 3152, 3047, 1354, 861, 960, 115, 1649, 2821, 920, 1907, 1612, 2327, 1656, 928, 2384], "1681": [1948, 3152, 507, 653, 126, 653, 920, 224, 3097, 329, 2549, 2524, 928, 83, 2501, 821, 2645, 751], "3004": [454, 2060, 1798, 1429, 2323, 676, 3164, 920, 224, 3097, 400, 1656, 3057, 569, 276, 2661], "8492": [454, 1417, 1540, 2323, 2291, 1649, 920, 224, 810, 464, 1656, 1391, 1764, 635, 569, 276, 2645, 1245, 2684, 2737, 2424, 1147, 440], "5364": [1133, 1079, 2080, 100, 861, 213, 1085, 920, 224, 810, 2204, 2534, 139, 569, 3051, 802, 3044, 821, 3057, 1147, 751, 440], "1291": [1521, 1535, 2801, 2622, 846, 3103, 3164, 920, 224, 810, 1102, 588, 257, 1387, 139, 2724, 1796, 802, 2914, 1213], "2428": [308, 3152, 964, 337, 2928, 473, 1649, 920, 224, 810, 2204, 635, 395, 139, 101, 3161, 276], "1639": [2347, 911, 2281, 1429, 653, 2243, 2282, 920, 224, 3097, 1997, 928, 2645, 1530, 2737, 1028, 1075, 257, 2912, 569, 2362, 2424, 2409, 1525, 751, 1607, 1342, 139, 83, 2061, 1796, 276, 588, 2549, 2524, 2936, 2384, 2638, 2501, 768, 1213], "4409": [1948, 421, 940, 2928, 1661, 3164, 920, 224, 3097, 706, 2990, 326, 1656, 1606, 2015, 635, 928, 1231, 276, 1839, 1113, 2424, 2737, 2409, 2676, 1876], "2834": [2858, 2864, 1803, 3084, 652, 2063, 920, 224, 3097, 2510, 2549, 2524, 1195, 588, 1764, 257, 1505, 83, 569, 2362, 1796, 2501, 1245, 276, 768, 1213, 751], "5593": [1521, 1222, 2927, 2868, 653, 2243, 1085, 920, 224, 3097, 1997, 588, 257, 855, 704, 1796, 2424, 1431, 2737, 1213, 1147], "596": [1449, 433, 2354, 1463, 861, 2484, 1085, 920, 224, 3097, 2510, 1656, 2962, 569, 608, 1608, 276, 3044, 2645, 2409, 2661], "4498": [515, 3152, 668, 752, 861, 152, 1085, 920, 224, 810, 3142, 1656, 1108, 2912, 635, 569, 3054, 803, 2362, 3051, 436, 502, 1028, 1147, 1525], "2047": [1726, 1191, 794, 861, 621, 1085, 920, 224, 3097, 706, 1074, 1391, 859, 828, 2760, 1570, 467, 2661, 1656, 257, 2912, 569, 2456, 1912, 2362, 802, 1113, 1431, 3044, 2409, 3019, 1525, 139, 855, 83, 2168, 704, 440, 2549, 2524, 2936, 2384, 430, 2501, 768, 1147], "8354": [1521, 1222, 3084, 2419, 846, 920, 224, 810, 553, 2990, 2153, 139, 2168, 1231, 276, 2645, 1113, 2424, 2737, 1147, 440], "3031": [515, 3152, 2984, 1047, 1752, 846, 920, 224, 810, 2964, 2549, 2524, 83, 2384, 2501, 2424, 2737], "4256": [3068, 1713, 1937, 653, 2668, 48, 920, 224, 3097, 706, 2409, 569, 276, 2661], "8377": [2347, 2918, 1081, 653, 54, 3164, 920, 224, 3097, 1997, 2549, 2524, 2153, 139, 83, 2168, 318, 802, 2424, 276, 2737, 2501, 1028, 1147, 2184, 3057], "30": [515, 294, 838, 861, 425, 757, 920, 224, 2867, 1533, 1108, 3054, 2902, 803, 2362, 436, 2424, 802, 2737, 502, 1147, 2734, 764], "2360": [1948, 3152, 838, 653, 1304, 757, 920, 224, 810, 1102, 2479, 139, 2362, 1762, 276, 802, 768, 1028, 1147, 751], "3604": [1199, 2770, 838, 861, 213, 2330, 2814, 119, 1644, 2753, 1656, 2549, 2524, 2936, 83, 3054, 2384, 2902, 276, 2501, 2424, 436, 2737, 1147, 440], "4975": [1948, 421, 1053, 2323, 676, 861, 920, 224, 3097, 2510, 2990, 2960, 2912, 635, 1231, 3044, 1113, 3019, 1525, 1505, 440], "1495": [1234, 3152, 2223, 653, 2243, 1085, 920, 224, 810, 918, 588, 2732, 257, 2479, 569, 2384, 2362, 1762, 1796, 2645, 2424, 2737, 1213, 1028], "7945": [1449, 2060, 591, 1841, 507, 2928, 813, 846, 920, 1144, 1761, 760, 1856, 2384, 569, 276, 2936], "7293": [1133, 378, 29, 653, 1225, 861, 920, 224, 3097, 706, 2549, 2524, 929, 2479, 83, 2456, 1762, 2501, 2424, 2737, 69, 1525], "500": [1640, 3152, 2820, 536, 653, 210, 653, 920, 224, 810, 3142, 2549, 2524, 1895, 635, 83, 3054, 569, 2656, 276, 2645, 2501, 436, 1147, 2178], "3750": [1948, 3152, 964, 1329, 846, 1372, 2063, 920, 224, 810, 8, 1391, 2912, 2936, 1699, 2384, 1147, 1525, 440], "358": [2248, 166, 2082, 846, 1881, 48, 920, 224, 810, 1102, 1968, 1195, 2479, 3061, 1362, 2362, 1762, 2424, 2737, 390], "8836": [194, 1713, 2323, 1963, 1649, 920, 224, 810, 2964, 1075, 1764, 2709, 2660, 1895, 3054, 569, 1810, 2656, 2711, 276, 1245, 2424, 802, 2737, 436, 768, 2178], "6502": [839, 509, 2121, 861, 44, 846, 920, 224, 3097, 400, 1108, 1764, 502, 569, 3054, 822, 803, 2645, 1245, 2424, 2737, 3044, 2728, 436], "4862": [515, 1222, 2121, 861, 800, 48, 920, 1907, 1612, 2327, 1075, 257, 2936, 2061, 2384, 3051, 3044, 2914, 2409, 2130, 2661], "164": [1550, 378, 955, 653, 1093, 757, 920, 224, 3097, 706, 588, 1108, 257, 2153, 395, 1213, 3054, 2168, 803, 2362, 3161, 1796, 276, 2645, 2424, 436, 2737, 2545, 502, 1028], "8825": [89, 3152, 580, 653, 2243, 1085, 920, 224, 810, 464, 1108, 2962, 3054, 569, 2902, 859, 803, 1570, 1608, 436, 2424, 2737, 502], "6351": [1550, 378, 1089, 2928, 1659, 846, 920, 224, 3097, 1291, 2549, 2524, 1387, 83, 2724, 2501, 2645, 2424, 2737], "6129": [308, 653, 856, 653, 920, 224, 3097, 329, 2549, 2524, 83, 276, 2645, 2424, 2501, 2737], "2034": [515, 165, 1901, 2928, 473, 3164, 920, 224, 810, 2204, 2549, 2524, 1108, 3057, 2479, 1895, 83, 3054, 2061, 2178, 803, 2362, 2656, 1762, 2501, 436, 2424, 2737, 502, 1028, 751], "5286": [438, 1222, 2346, 861, 152, 3023, 920, 224, 3097, 1889, 966, 2936, 635, 139, 569, 2384, 2643, 2362], "5709": [1234, 3152, 964, 861, 1955, 48, 920, 224, 3097, 1025, 588, 1607, 2737, 257, 1843, 928, 569, 139, 1796, 276, 2424, 1530, 1213, 2679], "6110": [1133, 2864, 653, 210, 2928, 920, 224, 810, 3142, 1607, 928, 569, 2914, 1530, 751], "5279": [2069, 378, 2494, 2065, 888, 507, 976, 1034, 3084, 1182, 653, 1284, 742, 998, 920, 1144, 1761, 760, 3014, 3057], "8802": [1133, 1417, 640, 653, 210, 846, 920, 224, 3097, 2510, 2582, 1548, 440], "2698": [3068, 2770, 995, 861, 152, 846, 920, 224, 3097, 1889, 2990, 2479, 1895, 1231, 2737, 1028, 1075, 257, 3054, 2362, 2656, 1113, 1431, 2424, 1796, 2178, 588, 635, 1762, 436, 1213, 1147], "2705": [2665, 294, 653, 1093, 2282, 920, 224, 810, 2201, 1342, 569, 2638, 276, 763, 751], "4972": [1521, 1079, 1238, 861, 1320, 2928, 920, 224, 3097, 2510, 635, 569, 2970, 608], "2302": [2858, 1618, 2223, 71, 653, 1304, 2003, 920, 224, 3097, 1997, 1656, 1387, 569, 2724, 1147, 276, 2424, 2723, 2737, 2409, 2677, 946, 440], "2248": [2605, 2446, 591, 1486, 3157, 2928, 582, 3164, 920, 224, 3097, 329, 1656, 1108, 139, 3054, 569, 2384, 803, 2645, 802, 2424, 2737, 2409, 502, 436, 2661], "6425": [2598, 1222, 2833, 861, 2484, 2003, 920, 224, 810, 2204, 1147, 569, 2645, 2424, 2737], "6252": [1521, 1535, 964, 154, 861, 152, 1649, 920, 224, 3097, 1889, 1895, 2936, 3054, 2384, 2656, 276, 436, 2424, 2737, 2178], "9331": [2554, 1417, 1902, 1217, 846, 2410, 1649, 920, 224, 810, 1428, 2168, 1525, 2362, 2153], "6492": [194, 1535, 1736, 2928, 1659, 2323, 920, 224, 810, 1161, 2732, 1662, 1961, 1699, 928, 569, 2168, 1509, 608, 1295, 3044, 2442, 2153, 598, 2677, 1854, 1532, 763], "8594": [2858, 307, 2785, 2203, 2323, 2298, 861, 920, 1144, 1761, 760, 588, 257, 928, 569, 1796, 3051, 3044, 1213, 1509], "3587": [308, 3152, 2903, 653, 2243, 757, 920, 224, 810, 1102, 588, 2612, 257, 635, 139, 855, 704, 1796, 1431, 1213, 1147], "3469": [2858, 2918, 1622, 1354, 653, 3017, 48, 920, 224, 3097, 329, 2549, 2524, 635, 1013, 83, 569, 2764, 2501, 2645], "7007": [1550, 3152, 1077, 846, 673, 861, 920, 224, 3097, 2363, 2549, 2524, 635, 2962, 83, 1608, 2501, 2645], "8237": [3068, 216, 902, 861, 745, 2323, 920, 224, 3097, 329, 588, 257, 2502, 635, 1796, 2645, 1213, 486], "2076": [1951, 3152, 2104, 2968, 861, 152, 3164, 920, 224, 810, 2204, 1028, 1147, 2384, 2734], "8990": [1948, 421, 593, 861, 2484, 846, 920, 224, 3097, 706, 635, 1570, 859], "937": [1550, 684, 2121, 653, 210, 1649, 920, 1907, 1612, 2327, 2549, 2524, 2936, 83, 569, 2384, 2501, 751], "2798": [3068, 2446, 1937, 653, 210, 846, 920, 224, 3097, 706, 1108, 2960, 635, 3019, 3054, 803, 3051, 436, 3044, 502, 1147], "9283": [1951, 1143, 1901, 2048, 846, 1122, 1174, 2814, 119, 1644, 2414, 635, 928, 1362, 276, 821, 2645, 2424, 2737, 1627, 390], "6426": [1133, 2060, 628, 653, 2243, 1085, 920, 224, 3097, 706, 2912, 1606, 569, 276, 1548, 429, 1525], "4347": [1550, 3152, 955, 2928, 131, 691, 2814, 119, 451, 1119, 2990, 1656, 1699, 1231, 276, 2645, 1113, 2677, 946], "6792": [2598, 378, 2346, 861, 213, 1649, 920, 224, 3097, 2642, 1656, 1548, 3088, 569], "8713": [1449, 221, 2104, 653, 784, 2063, 920, 224, 810, 2101, 635, 768], "4384": [3068, 378, 2121, 2928, 2145, 2063, 920, 224, 3097, 400, 1362, 390, 318, 276, 2184, 440], "8640": [2605, 433, 642, 2370, 507, 846, 2639, 3082, 861, 1033, 920, 1907, 2302, 896, 635], "7481": [1554, 1222, 930, 846, 1881, 1085, 920, 224, 3097, 706, 1895, 859, 828, 1570, 2737, 257, 929, 569, 2456, 3054, 2420, 2362, 2424, 69, 83, 2168, 704, 1796, 2178, 2549, 2524, 588, 2501, 436, 1213], "7036": [839, 1417, 2223, 861, 213, 1174, 2814, 119, 451, 1119, 2534, 1864, 2960, 635, 3019, 569, 2384, 2409, 276, 440, 1548, 1147, 2661], "9250": [3068, 2005, 1152, 2323, 1963, 2063, 920, 224, 810, 2204, 133], "2357": [438, 1535, 143, 861, 152, 349, 920, 224, 3097, 706, 704, 2645, 1387], "1865": [2858, 2864, 322, 653, 2668, 3164, 920, 224, 3097, 400, 1895, 635, 1387, 3054, 569, 2656, 2645, 436, 1525, 2178, 440], "3418": [2248, 2446, 2371, 653, 210, 1047, 920, 224, 3097, 2510, 2534, 1895, 3054, 2384, 2168, 2656, 436, 2645, 2153, 2178], "8588": [1449, 1713, 940, 2928, 1659, 48, 920, 224, 810, 8, 2479, 2936, 2384, 1762, 318, 2645, 2424, 2914, 2737, 2184], "151": [1726, 221, 630, 861, 2484, 846, 920, 224, 3097, 400, 569], "6183": [1948, 3152, 334, 2323, 2070, 846, 920, 224, 3097, 706, 1108, 569, 3054, 859, 803, 608, 1570, 2645, 2424, 436, 2737, 2409, 502, 3088, 440], "844": [1199, 1417, 964, 653, 2243, 1085, 920, 224, 3097, 1889, 2015, 276, 1839, 2424, 2737, 1295, 3057], "1514": [1234, 3152, 964, 653, 2243, 1085, 920, 224, 3097, 706, 2549, 2524, 2912, 83, 569, 2501, 276, 2424, 2737, 2409, 1525], "2465": [2598, 509, 29, 2928, 1659, 861, 920, 224, 3097, 706, 588, 1968, 2479, 3061, 2384, 1762, 2424, 768, 2737], "4772": [454, 1222, 2593, 1047, 2690, 3164, 920, 224, 3097, 2510, 2549, 2524, 588, 257, 2479, 83, 1762, 1796, 318, 2501, 2424, 2737, 1213, 2184], "7446": [2069, 509, 1540, 861, 1955, 3164, 920, 224, 810, 2204, 1968, 1764, 3061, 569, 1245, 2645, 751], "5526": [2352, 1222, 1636, 2995, 653, 2668, 1649, 920, 224, 3097, 1889, 1656, 929, 704, 2424, 2737, 1548, 69, 2661], "7901": [515, 221, 2346, 861, 213, 653, 920, 224, 3097, 1889, 1607, 2524, 2549, 928, 569, 83, 2501, 1530, 1882], "1801": [3040, 911, 1385, 653, 2668, 653, 920, 224, 3097, 706, 1108, 3054, 855, 803, 859, 704, 1570, 276, 436, 2645, 1431, 502], "1768": [2554, 294, 1902, 653, 2243, 3164, 920, 224, 3097, 1889, 2549, 2524, 2912, 1387, 83, 2724, 276, 2645, 2501, 1525], "8958": [454, 2464, 1466, 1610, 861, 231, 349, 920, 224, 3097, 2510, 2936, 527, 569, 2384, 2645, 3044, 440], "3804": [89, 421, 838, 861, 2845, 1649, 920, 224, 810, 1369, 1656, 3014, 569, 440], "9126": [2665, 2770, 29, 653, 2243, 1649, 920, 224, 3097, 1812, 2549, 2524, 83, 2501, 2734], "4922": [89, 378, 640, 653, 1225, 2928, 920, 224, 3097, 400, 569, 608, 2424, 2737, 69, 1876], "4786": [1133, 2464, 630, 887, 653, 2668, 846, 920, 224, 3097, 706, 2479, 2384, 1762, 276, 2424, 2737, 2734], "4639": [1521, 1943, 2066, 989, 2928, 1679, 2928, 920, 1907, 2185, 1043, 1656, 928, 569, 139, 2241, 2645, 2599, 1062, 2088], "4545": [1449, 1670, 334, 2323, 1963, 846, 920, 224, 3097, 400, 588, 1195, 257, 2362, 1796, 276, 2424, 2737, 1213], "3589": [2598, 2864, 2975, 2928, 131, 757, 920, 224, 810, 394, 1607, 928, 569, 2384, 1530, 3057], "1150": [2554, 2060, 2223, 653, 1499, 48, 920, 224, 3097, 1889, 1607, 1108, 1342, 1387, 928, 569, 3054, 803, 2638, 276, 2645, 802, 436, 1530, 502], "8635": [1951, 3152, 496, 2928, 2518, 48, 920, 224, 810, 3142, 139, 569, 2362, 276, 1113, 1548, 2728], "806": [454, 294, 2195, 3029, 861, 1955, 1649, 920, 224, 810, 1102, 139, 1147, 2645], "6465": [308, 3152, 707, 1454, 653, 2668, 2323, 920, 224, 3097, 706, 1570, 3065, 1525, 859], "7155": [2598, 2446, 29, 861, 152, 1085, 920, 224, 3097, 1398, 2549, 2524, 2912, 1387, 83, 2362, 2501, 802, 1028, 1147], "3199": [1948, 3152, 238, 861, 44, 2282, 920, 224, 3097, 1989, 2737, 2912, 2502, 139, 569, 2168, 608, 276, 2424, 768, 2153, 486], "8466": [2598, 509, 79, 2240, 653, 1304, 1649, 920, 224, 810, 1428, 588, 257, 139, 1796, 2645, 2424, 2737, 1213, 1147, 3057], "7556": [438, 2142, 1152, 861, 213, 846, 920, 224, 3097, 1025, 2936, 1013, 2384, 2764, 2409, 1028, 1147, 2661], "7749": [1133, 294, 712, 653, 2956, 510, 2814, 119, 1644, 1370, 1656, 1108, 1764, 635, 3054, 569, 803, 608, 276, 436, 2645, 1245, 502, 2677], "6312": [2069, 166, 2334, 846, 1122, 757, 920, 224, 810, 3135, 1108, 1013, 584, 1228, 2645, 486, 2661, 717, 257, 3054, 569, 2764, 802, 3044, 2613, 139, 803, 2735, 1796, 502, 588, 2502, 2936, 635, 436, 1213, 2631], "3580": [515, 294, 2223, 2849, 846, 2410, 2003, 920, 224, 810, 1369, 2534, 1391, 569, 2384, 608, 2645, 3044, 802, 1147, 440], "4490": [1234, 3152, 2223, 846, 2410, 1777, 920, 224, 3097, 1889, 1391, 91, 2936, 2384, 1431, 1147, 440], "5186": [2665, 1618, 2202, 2928, 2518, 1047, 920, 1144, 1761, 760, 2549, 2524, 635, 83, 2501, 2645], "7492": [1951, 3152, 964, 861, 2611, 2323, 920, 224, 3097, 706, 588, 1656, 257, 3054, 569, 2902, 1796, 436, 1213], "214": [1521, 1191, 2223, 846, 1881, 1085, 920, 224, 3097, 1889, 1656, 1260, 2960, 2502, 2168, 3004, 3044, 2153, 3019, 486, 1481], "2069": [1234, 3152, 2354, 2323, 1967, 2063, 920, 1907, 1612, 2327, 928, 569, 2384, 1530], "8979": [3048, 221, 1937, 1177, 861, 2484, 846, 920, 224, 3097, 706, 2549, 2524, 1108, 751, 83, 3054, 803, 2501, 436, 2424, 2645, 2737, 502, 3057], "456": [1121, 911, 1540, 846, 1881, 846, 920, 224, 3097, 706, 2549, 2524, 1108, 83, 3054, 803, 2501, 436, 2424, 2737, 502], "4058": [2665, 378, 2481, 2928, 1410, 2282, 920, 1907, 1612, 2327, 588, 257, 1606, 1796, 276, 1213], "75": [1051, 476, 29, 846, 759, 1047, 920, 224, 3097, 706, 1656, 2479, 569, 2942, 2362, 1762, 598, 1028], "6360": [308, 3152, 1540, 653, 2243, 1085, 920, 224, 810, 18, 1607, 2936, 635, 1342, 928, 569, 2384, 2638, 276, 3044, 768, 1530, 1509], "7978": [1951, 1143, 29, 2928, 1616, 846, 920, 224, 3097, 706, 1013, 635, 2764, 276, 2645, 2424, 2737, 1147, 440], "7241": [1234, 3152, 580, 653, 2668, 757, 920, 224, 3097, 1889, 768, 751, 2362], "5700": [2347, 378, 923, 2928, 1659, 861, 920, 224, 3097, 706, 1108, 1895, 3061, 928, 1530, 2737, 2661, 257, 3054, 569, 2656, 2424, 2409, 1607, 83, 803, 1796, 502, 2178, 588, 1968, 2549, 2524, 2384, 2501, 436, 768, 1213], "7645": [308, 1622, 2046, 653, 106, 1649, 920, 1907, 1612, 2327, 395, 569, 1178, 797, 1113, 2661], "7509": [2665, 433, 2944, 861, 231, 1047, 920, 1144, 1761, 760, 2728, 2424, 1108, 569, 2737], "6519": [2069, 2864, 1541, 861, 538, 757, 920, 224, 3097, 400, 569, 2384, 2362, 1525, 2936], "2234": [2248, 216, 1920, 846, 2787, 758, 2814, 119, 1644, 2208, 1587, 635, 139, 2362, 276, 3044, 1113, 1548], "3038": [3040, 378, 1037, 653, 210, 3164, 920, 224, 810, 3142, 2549, 2524, 588, 1391, 257, 2479, 83, 2362, 1762, 1796, 2501, 1213, 1028, 1147, 440], "9377": [1234, 3152, 1129, 2323, 1697, 2282, 920, 224, 3097, 706, 2709, 139, 2362, 2645, 3044, 821], "3062": [1051, 378, 868, 653, 2668, 846, 920, 224, 3097, 400, 2549, 2524, 3099, 929, 635, 69, 368, 569, 139, 2168, 83, 2362, 112, 2501, 2645, 3044, 1147, 440], "9123": [2347, 911, 3077, 653, 1569, 48, 920, 224, 3097, 2510, 2549, 2524, 1764, 83, 569, 2324, 608, 2501, 1245, 3044, 276], "709": [194, 911, 653, 359, 653, 920, 224, 3097, 329, 86], "9175": [438, 226, 2090, 2141, 861, 2484, 2928, 920, 224, 3097, 2510, 2549, 2524, 83, 569, 2362, 2501, 1147], "8099": [438, 221, 1636, 846, 3103, 2282, 920, 224, 3097, 400, 1764, 2912, 1895, 1013, 3054, 569, 2764, 855, 2656, 2178, 704, 608, 1245, 1431, 821, 768, 436, 598, 3057, 1525, 1505], "800": [1948, 3152, 1902, 861, 152, 757, 920, 224, 3097, 2333, 1108, 1764, 635, 3054, 569, 803, 1245, 2645, 436, 2737, 2424, 502], "4056": [1948, 421, 2223, 735, 653, 2331, 757, 920, 224, 810, 2109, 1391, 1108, 1013, 2645, 486, 3054, 569, 2764, 2362, 802, 751, 83, 803, 276, 502, 440, 2549, 2524, 2502, 2936, 635, 2384, 608, 2501, 436, 768, 1147], "7959": [515, 3152, 2984, 861, 2611, 3164, 920, 224, 3097, 706, 1968, 3061, 139, 802, 2424, 2737, 3057], "8811": [3048, 433, 1226, 1463, 861, 960, 153, 1047, 920, 224, 3097, 329, 1656, 569, 3044, 2661], "7502": [438, 294, 504, 653, 1403, 1085, 920, 224, 810, 2101, 2732, 1606, 929, 635, 569, 2384, 2178, 2643, 704, 276, 1113, 3143, 2265, 2409, 1854, 69, 1525, 2285, 1876], "5210": [515, 294, 838, 2048, 861, 1594, 653, 920, 224, 810, 2204], "8333": [515, 3152, 1723, 861, 152, 757, 920, 224, 3097, 1889, 2479, 2737, 2677, 1876, 1656, 739, 257, 569, 2362, 1992, 802, 2424, 69, 1195, 83, 139, 1796, 276, 588, 2549, 2524, 635, 2384, 1762, 2501, 768, 1213], "4667": [1951, 421, 642, 507, 846, 1340, 3164, 920, 1907, 1612, 2777, 1108, 257, 3054, 803, 3051, 436, 3044, 502], "4907": [1951, 421, 787, 861, 468, 2323, 920, 224, 810, 464, 1968, 635, 3061, 569, 3054, 2902, 436, 763, 751], "2585": [1726, 1191, 51, 1543, 1354, 653, 2322, 783, 653, 296, 920, 1907, 1612, 2327, 69, 2854, 2362], "3315": [454, 1618, 692, 861, 2433, 846, 920, 224, 810, 754, 635, 3054, 569, 436, 980, 763, 751], "3021": [1449, 1079, 713, 653, 359, 653, 920, 224, 3097, 400, 1656, 1147, 440], "44": [454, 911, 653, 210, 3164, 920, 224, 3097, 329, 635, 2168, 2362, 276, 2645, 1113, 768, 2153], "3279": [1948, 3152, 1902, 653, 2668, 1085, 920, 224, 3097, 706, 1656, 1968, 1195, 3061, 276, 440], "413": [670, 911, 2346, 846, 2410, 2919, 2814, 119, 451, 124, 2990, 2479, 1013, 3061, 1362, 1231, 2645, 2153, 2737, 1481, 1876, 1656, 569, 2764, 2579, 318, 2424, 1113, 69, 2184, 1387, 2168, 1856, 276, 1968, 635, 608, 2724, 1762, 1111, 768, 1147, 390], "7310": [1726, 1079, 1385, 861, 2611, 3164, 920, 224, 3097, 706, 2549, 2524, 1968, 3061, 83, 2362, 2501, 276, 2424, 2737, 2409, 1028], "1452": [2069, 1535, 787, 2928, 473, 2063, 920, 224, 3097, 706, 588, 1656, 1074, 257, 430, 2760, 1796, 276, 2645, 1213, 751], "9042": [438, 1417, 42, 653, 1304, 3023, 920, 224, 810, 2201, 588, 1607, 1391, 257, 2502, 1213, 928, 569, 2384, 859, 1570, 1796, 2545, 2645, 1113, 1530, 2728, 1147, 486, 751, 440], "1656": [1133, 378, 964, 2928, 473, 846, 920, 224, 3097, 706, 2479, 1895, 2645, 2914, 2737, 1028, 486, 3054, 569, 2656, 2362, 318, 3044, 2424, 2184, 83, 2178, 2549, 2524, 2502, 608, 3112, 1762, 2501, 436, 768, 3057], "1065": [2248, 1670, 1636, 653, 359, 846, 920, 224, 3097, 1291, 2912, 635, 569, 2645, 1147, 1525], "2736": [2069, 476, 472, 2928, 131, 2330, 2814, 119, 451, 957, 2936, 635, 2384, 276, 2424, 2737, 1548], "2177": [2858, 911, 628, 861, 152, 1174, 920, 224, 3097, 706, 588, 257, 2479, 2362, 1762, 1796, 2424, 2737, 1213, 1028, 1147, 2734], "5144": [3040, 378, 3020, 653, 2668, 1085, 920, 224, 3097, 706, 1656, 929, 139, 3054, 2168, 2265, 704, 2068, 436, 3143, 2153, 69], "5120": [2248, 1222, 398, 2277, 2323, 2205, 846, 920, 224, 3097, 2510, 1801, 806, 569, 608, 2914, 3044, 908], "2469": [1951, 2770, 1902, 2928, 1659, 48, 920, 224, 3097, 706, 1607, 1108, 1764, 1895, 928, 3054, 569, 2319, 803, 2656, 2384, 276, 1245, 436, 768, 1530, 1548, 502, 2178, 82], "932": [1121, 2060, 1540, 653, 2243, 1085, 920, 224, 810, 3142, 257, 2912, 1895, 1525, 2502, 635, 569, 3054, 855, 2178, 2656, 704, 436, 1431, 486, 2130, 440], "188": [670, 378, 861, 1955, 2330, 2814, 119, 1644, 2208, 1195, 1764, 929, 2578, 2574, 569, 162, 1599, 855, 2362, 704, 276, 1245, 3044, 1431, 2153, 2228, 768, 2677, 69], "5669": [1121, 911, 2323, 1768, 1085, 920, 224, 810, 3142, 2549, 2524, 1387, 1013, 83, 2764, 2724, 2501, 276, 2645], "5435": [2069, 509, 2968, 861, 152, 2063, 920, 224, 2867, 819, 276, 2737, 2424, 2724, 1387], "16": [1121, 221, 1937, 1235, 653, 1403, 653, 920, 224, 3097, 706, 2549, 2524, 2734, 2962, 83, 855, 704, 2501, 1608, 1431, 3057, 2661], "1578": [1051, 619, 964, 2928, 131, 1085, 920, 224, 810, 464, 588, 2524, 2549, 1108, 717, 257, 635, 502, 83, 3054, 1362, 803, 1796, 2501, 436, 2735, 1213, 751, 390], "6432": [1051, 2918, 838, 653, 1093, 1174, 2814, 119, 1644, 2753, 139, 1147, 802], "1969": [1051, 3152, 2928, 2485, 846, 920, 224, 3097, 1025, 2549, 2524, 588, 257, 83, 1796, 2501, 2424, 2737, 1213], "613": [1234, 3152, 868, 830, 861, 2484, 2063, 920, 224, 3097, 1025, 2734, 569, 257, 2130], "6844": [1726, 509, 829, 2286, 653, 210, 1174, 920, 224, 3097, 329, 2479, 1647, 1762, 2645, 2424, 2914, 2737, 1147, 440], "4505": [2605, 1943, 2354, 626, 653, 784, 1047, 920, 1907, 1612, 2327, 1108, 139, 3054, 803, 2947, 436, 502], "4858": [515, 221, 1937, 861, 489, 2928, 920, 224, 3097, 706, 1147, 821, 802, 440], "7611": [1550, 421, 1902, 735, 861, 2611, 2330, 2814, 119, 451, 957, 276, 2645], "5488": [3040, 911, 29, 2928, 2485, 653, 920, 224, 3097, 706, 1108, 3054, 803, 2362, 276, 436, 2424, 2737, 502, 1028, 1147], "8147": [1726, 1618, 2281, 1795, 846, 3121, 757, 920, 224, 3097, 706, 2661, 1391, 139, 3044, 768, 2409, 1147, 440], "694": [1554, 1417, 1106, 688, 861, 1974, 48, 920, 224, 3097, 2510, 139, 2362, 802, 1028, 1147, 2734], "2053": [2665, 294, 2820, 653, 2668, 3164, 920, 224, 3097, 706, 2549, 2524, 1895, 83, 3054, 2656, 2501, 436, 276, 2178], "2114": [1550, 221, 1106, 1832, 653, 2119, 653, 920, 1144, 1906, 646, 928, 569, 2384, 1548, 1147, 1525], "1269": [2347, 166, 1053, 653, 2243, 2282, 920, 1907, 2185, 2538, 1968, 1108, 3061, 2962, 928, 3054, 803, 1608, 436, 3044, 2424, 2737, 502], "7200": [515, 294, 964, 861, 152, 2282, 920, 224, 810, 464, 588, 257, 2502, 569, 1796, 276, 1113, 1213, 486], "9458": [454, 421, 861, 2484, 2063, 920, 224, 3097, 400, 2384], "2780": [1948, 955, 861, 425, 3023, 920, 224, 2867, 2920, 1656, 1391, 2737, 1764, 2936, 2962, 635, 569, 2168, 608, 2362, 440, 1608, 2495, 1245, 2424, 2153, 276, 1028, 1147, 2661], "3033": [2605, 2918, 496, 2928, 473, 3164, 920, 224, 3097, 706, 2549, 2524, 588, 257, 83, 569, 139, 608, 1796, 2501, 276, 2424, 2737, 1548, 1213], "8962": [1550, 1079, 580, 985, 2928, 2694, 1649, 920, 224, 3097, 706, 3050, 2912, 635, 395, 3161, 821, 1525], "1520": [1948, 421, 2223, 653, 2243, 1085, 920, 224, 3097, 1889, 929, 608, 1147, 704, 276, 69, 440], "9052": [1051, 1079, 1720, 1782, 861, 152, 3164, 920, 224, 3097, 706, 2709, 929, 2960, 635, 3019, 569, 2420, 2362, 704, 2645, 69], "1825": [454, 2770, 2223, 846, 2176, 2063, 920, 224, 810, 394, 276, 1228, 2384, 584], "4071": [89, 619, 2640, 2716, 2928, 2055, 846, 920, 224, 810, 2204, 1295, 276, 2645, 257, 2130], "3649": [194, 619, 640, 861, 152, 846, 920, 224, 3097, 329, 2549, 2524, 1108, 83, 1856, 3054, 569, 803, 608, 2501, 436, 2645, 502], "2203": [839, 294, 1358, 2928, 582, 861, 920, 224, 3097, 400, 588, 2524, 2549, 1391, 257, 83, 1796, 2501, 2645, 1213, 1147, 440], "8798": [2554, 2464, 322, 337, 846, 1372, 1047, 920, 224, 3097, 1889, 2384], "2603": [1521, 421, 861, 2484, 48, 920, 224, 810, 1218, 1656, 929, 635, 69, 139, 569, 162, 3054, 859, 2362, 383, 704, 1570, 2574, 2902, 3044, 608, 436, 2442, 946, 763], "4529": [2598, 3152, 2213, 861, 231, 653, 920, 224, 2798, 606, 1656, 156, 569, 2168, 2153, 1147, 440], "8119": [839, 911, 2223, 1790, 653, 1304, 846, 920, 224, 810, 1102, 2549, 2524, 83, 569, 2362, 3130, 2501, 2424, 2737, 1525], "888": [1051, 476, 2801, 846, 1687, 1085, 920, 224, 3097, 1889, 1195, 1764, 139, 569, 855, 2362, 704, 318, 1245, 3044, 1431, 3108, 1295, 1147, 1525, 2184, 1505, 440], "2775": [3048, 378, 498, 604, 2323, 2704, 1047, 920, 224, 3097, 2510, 1656, 1108, 1387, 3054, 803, 2645, 436, 502], "846": [2352, 1535, 1540, 653, 210, 3164, 920, 224, 3097, 706, 326, 1895, 2163, 1645, 859, 1570, 3051, 2676, 1656, 3054, 569, 2362, 2656, 1245, 802, 3044, 2409, 1525, 139, 2168, 3004, 2178, 1764, 635, 436, 2442, 1260], "7847": [2352, 1535, 591, 2317, 403, 2928, 1605, 1962, 653, 181, 920, 1907, 1612, 2327, 1656, 1195, 1158, 2406, 635, 139, 2362], "7628": [515, 221, 2801, 2437, 653, 1093, 1777, 2814, 119, 1644, 2414, 2549, 2524, 2960, 929, 69, 83, 569, 704, 2501, 3019, 1525], "7780": [2846, 2464, 1636, 2928, 303, 1047, 920, 224, 3097, 400, 1764, 1013, 569, 2764, 2362, 1245, 2424, 2645, 2737], "6663": [2598, 166, 3059, 653, 2243, 757, 920, 224, 810, 1102, 569, 2645, 608], "9000": [2347, 509, 1538, 1047, 3127, 3023, 920, 224, 3097, 400, 2912, 855, 704, 276, 2645, 1431, 1525, 751], "268": [3040, 2864, 2, 653, 359, 1047, 920, 224, 3097, 400, 1801, 1113, 2337, 853], "3944": [438, 2465, 642, 2159, 514, 846, 241, 2323, 2309, 920, 1907, 2302, 896, 2075, 257], "8438": [1951, 3152, 128, 861, 152, 2063, 920, 224, 810, 2204, 2549, 2524, 588, 257, 2912, 83, 1796, 2501, 1213, 1147, 1525, 440], "3535": [2554, 378, 1828, 861, 213, 1174, 920, 224, 3097, 1889], "9034": [1234, 3152, 2256, 632, 989, 846, 2639, 2928, 851, 920, 1144, 1761, 760, 69, 139, 569, 929, 2362], "9300": [454, 378, 3163, 2323, 861, 920, 1907, 2185, 1043, 1108, 2912, 1387, 3054, 569, 803, 608, 436, 502, 1525], "7811": [438, 2446, 630, 861, 2484, 846, 920, 224, 3097, 706, 2549, 2524, 1895, 2962, 83, 2168, 3054, 139, 2656, 1608, 436, 2501, 802, 2153, 2178], "1139": [194, 2770, 3020, 861, 468, 1085, 920, 224, 810, 2204, 569], "8664": [2605, 619, 3081, 2308, 2928, 473, 846, 920, 224, 3097, 1997, 588, 1968, 1505, 3061, 635, 139, 1362, 821, 2424, 2737, 751, 390], "3712": [194, 1535, 3047, 1279, 861, 960, 2003, 920, 1907, 1612, 2327, 2384], "948": [2605, 2770, 3022, 2323, 2298, 846, 920, 224, 3097, 329, 1147, 2645, 1387], "305": [2248, 2464, 1611, 653, 210, 846, 920, 224, 3097, 2510, 2549, 2524, 1108, 83, 3054, 803, 2501, 436, 2645, 2424, 2737, 1548, 502, 751], "3008": [1133, 294, 1438, 861, 152, 2063, 920, 224, 3097, 400, 1656, 1391, 1903, 2936, 635, 2384, 2424, 1113, 2737, 3108, 2728, 1147, 440], "4386": [454, 509, 193, 2150, 653, 210, 2928, 920, 1144, 1761, 760, 588, 1108, 257, 2912, 1213, 3054, 803, 1796, 276, 436, 502, 1525], "1463": [1550, 3152, 653, 2243, 48, 920, 224, 3097, 400, 588, 1662, 257, 635, 395, 1796, 2424, 2914, 2737, 1213], "5866": [2248, 2770, 1294, 653, 811, 2282, 920, 224, 810, 12, 2912, 1387, 635, 2645, 1147, 1525], "8615": [1951, 3152, 794, 861, 1190, 861, 920, 224, 810, 2204, 635, 569, 2545], "5677": [1121, 433, 653, 2668, 48, 920, 224, 810, 1614, 569], "1100": [308, 3152, 193, 653, 210, 2928, 920, 1144, 1761, 760, 2549, 2524, 588, 257, 83, 1796, 2501, 276, 768, 3044, 1213, 751], "1175": [454, 1618, 2, 2323, 676, 861, 920, 224, 3097, 706, 2549, 2524, 1108, 635, 83, 3054, 803, 2501, 436, 2424, 2737, 502, 751], "7499": [670, 1618, 2346, 653, 600, 3023, 920, 224, 810, 2201, 588, 1108, 257, 2960, 2502, 1213, 3054, 803, 2362, 1796, 276, 802, 436, 502, 1028, 3019, 486], "2164": [2665, 2864, 1902, 1790, 653, 1440, 2063, 920, 224, 810, 464, 2549, 2524, 635, 83, 569, 608, 2501, 2424, 2737, 1505], "3999": [1948, 628, 1769, 861, 152, 2063, 920, 224, 3097, 2642, 2936, 139, 2384, 802, 1028, 1147, 2734], "8936": [1726, 2446, 334, 2928, 473, 861, 920, 224, 3097, 400, 2502, 2153, 2168, 2424, 768, 2737, 486], "8441": [1234, 3152, 1778, 653, 2243, 846, 920, 224, 810, 3142, 3057, 2645, 2424, 2737, 1387], "6682": [89, 294, 1540, 861, 468, 846, 920, 224, 3097, 706, 1876, 326, 2709, 1606, 1013, 1699, 2764, 318, 2409, 2676, 2889, 2184, 2661], "1668": [308, 3152, 1081, 846, 759, 2282, 920, 224, 3097, 1001, 2661, 1391, 2936, 2409, 1147, 440], "2134": [2598, 1618, 2927, 653, 2668, 3164, 920, 224, 3097, 706, 1195, 1764, 855, 569, 704, 276, 1245, 1431, 2424, 2737], "54": [308, 3152, 398, 507, 861, 1974, 861, 920, 224, 2798, 606, 1656, 2534, 2384, 3044, 802], "8532": [2846, 2060, 861, 1974, 846, 920, 224, 3097, 2510, 2677, 1525, 2912], "1961": [308, 2481, 653, 2103, 3164, 920, 1907, 2185, 1043, 1147, 440], "5369": [2598, 433, 2300, 3084, 2051, 846, 920, 224, 3097, 1025, 2912, 2936, 635, 2168, 2384, 2153, 2409, 1525, 2661], "1822": [515, 2142, 861, 1190, 2928, 920, 224, 3097, 400, 326, 1158, 1895, 2645, 2153, 2676, 257, 2912, 3054, 569, 2656, 318, 1431, 1525, 2184, 2534, 1156, 1387, 139, 2843, 855, 2168, 704, 1796, 276, 1689, 2178, 588, 2384, 436, 1213], "4519": [1948, 421, 2223, 653, 2668, 653, 920, 224, 810, 1102, 1607, 928, 569, 139, 1530], "9244": [1948, 1565, 861, 1320, 861, 920, 224, 3097, 329, 2936, 569, 2384, 2424, 2737, 2677], "779": [1951, 1143, 593, 653, 210, 846, 920, 224, 3097, 706, 929, 884, 3032, 2274, 569, 139, 2168, 2362, 3051, 3044, 69, 2238], "875": [670, 2060, 861, 1974, 3164, 920, 224, 3097, 400, 139, 569, 2384, 2362], "2119": [1051, 2446, 629, 861, 2484, 861, 920, 224, 3097, 1025, 1074, 635, 569, 430, 608, 2760, 2501, 821, 2645], "8145": [1234, 3152, 1229, 507, 846, 673, 2063, 920, 224, 3097, 329, 1656, 1391, 1387, 2168, 1113, 1147, 440], "7286": [1948, 1565, 3013, 861, 1311, 1281, 2814, 119, 1644, 1198, 1764, 1895, 3054, 569, 859, 2656, 1570, 276, 1245, 802, 436, 2178], "1310": [1234, 3152, 640, 1269, 861, 2484, 653, 920, 224, 3097, 400, 2549, 2524, 1387, 1425, 83, 569, 2724, 996, 2501, 2424, 2737], "9124": [2248, 1079, 1053, 653, 210, 861, 920, 1907, 1612, 795, 569, 2384], "3337": [1133, 509, 2, 861, 736, 2928, 920, 224, 3097, 1291, 1028, 139, 2362], "784": [2858, 619, 51, 1057, 403, 2928, 1605, 2928, 2460, 920, 1907, 1612, 2327, 1074, 2709, 1895, 635, 2936, 3054, 2384, 430, 2760, 2656, 318, 436, 2839, 2184, 2178], "4359": [2554, 1222, 1095, 861, 2484, 846, 920, 1144, 1761, 760, 1656, 588, 257, 1796, 2645, 1213, 1147], "5627": [1199, 1417, 794, 861, 213, 2282, 920, 224, 810, 1102, 3051, 318, 821, 3044, 2184], "6378": [1121, 2446, 2300, 861, 2484, 2063, 920, 224, 3097, 706, 1028, 2734], "1307": [839, 166, 3163, 2928, 2550, 3164, 920, 1907, 1612, 2327, 2936, 2962, 1608, 1548, 2728, 1147], "7820": [3048, 2918, 471, 2850, 653, 1093, 757, 920, 224, 3097, 706, 569, 276, 2424, 2737, 1548, 751], "1581": [1951, 2770, 3077, 2323, 676, 846, 920, 224, 3097, 400, 588, 257, 635, 3054, 569, 2902, 1796, 436, 2424, 2737, 1213, 751], "5460": [839, 619, 1540, 861, 213, 2282, 920, 224, 3097, 706, 2912, 2406, 318, 276, 821, 1525, 2184, 751], "1777": [1554, 166, 29, 861, 2611, 1649, 920, 224, 810, 2204, 2534, 2384, 2677], "688": [3048, 2770, 1547, 861, 2433, 846, 920, 224, 3097, 2510, 1656, 569], "5641": [1951, 1565, 2300, 2516, 2928, 2485, 2323, 920, 224, 3097, 706, 1656, 2549, 2524, 588, 2737, 257, 1895, 83, 3054, 2168, 2902, 2362, 1796, 2501, 436, 2424, 2153, 1213], "8840": [308, 3152, 630, 2928, 473, 846, 920, 224, 3097, 400, 2424, 276, 1525, 768, 2737], "4166": [2846, 476, 1902, 653, 1499, 3164, 920, 224, 810, 2204, 2549, 2524, 1108, 2936, 83, 3054, 569, 2384, 803, 276, 2645, 2424, 2501, 2737, 436, 502], "9371": [2846, 2446, 1707, 3084, 762, 861, 920, 1907, 1612, 2327, 2549, 2524, 1108, 2936, 83, 569, 2384, 3054, 803, 276, 436, 2424, 2501, 2737, 502, 751], "1790": [89, 433, 1778, 2323, 2070, 1047, 920, 224, 810, 2204, 1548], "9436": [2858, 216, 180, 2323, 2047, 846, 920, 224, 3097, 400, 1656, 1764, 276, 1245, 2424, 2737, 1548, 1295, 1147, 440], "1609": [1449, 294, 885, 653, 1569, 48, 920, 224, 3097, 400, 1108, 3054, 803, 436, 502, 1147, 3057], "4742": [1234, 3152, 2281, 653, 1539, 1649, 920, 224, 810, 1428, 201, 1801, 2709, 1342, 1013, 2153, 806, 569, 2168, 2764, 2362, 2638, 2480, 3044, 2424, 2737, 821, 2677, 763, 1505], "8167": [2347, 433, 653, 2668, 2323, 920, 224, 810, 1161, 588, 1391, 257, 929, 635, 569, 1147, 1796, 2645, 3044, 2424, 2737, 1213, 69, 440], "1586": [1449, 509, 1407, 2928, 2600, 1047, 920, 224, 3097, 400, 1245, 569, 1764, 3044, 2362], "4863": [2846, 2446, 1540, 2308, 861, 213, 3164, 920, 224, 3097, 706, 1895, 1013, 928, 3130, 2645, 2153, 2737, 257, 569, 3054, 2764, 2656, 2424, 1431, 2409, 2168, 855, 1856, 704, 1796, 1627, 2178, 440, 588, 436, 1213, 2631], "9050": [3040, 1618, 964, 653, 1304, 48, 920, 224, 3097, 706, 1195, 1108, 1387, 139, 3054, 569, 803, 2362, 276, 2645, 3044, 436, 1548, 502], "3334": [1199, 1222, 29, 653, 210, 1085, 920, 224, 810, 553, 1108, 533, 502, 635, 569, 3054, 803, 436, 1548, 2341, 598], "7227": [1133, 294, 2223, 727, 2323, 2289, 1085, 920, 224, 3097, 706, 1607, 1764, 2479, 928, 569, 1530, 1762, 276, 1245, 2424, 2737, 1481], "5007": [2069, 911, 2, 653, 856, 48, 920, 224, 3097, 400, 569, 1525, 2362], "4260": [670, 1713, 496, 715, 861, 152, 3164, 920, 224, 810, 2204, 2990, 1895, 1645, 1231, 2645, 2737, 2153, 1656, 257, 569, 3054, 2656, 802, 1113, 2424, 2130, 1387, 139, 2168, 2178, 2724, 436, 2734], "7480": [2605, 2465, 964, 310, 653, 54, 1649, 920, 224, 810, 2964, 1607, 1108, 2737, 635, 111, 928, 3054, 569, 859, 803, 1570, 436, 2424, 1530, 502, 3057], "4843": [438, 1079, 640, 482, 2323, 725, 3164, 920, 224, 3097, 706, 1764, 2479, 569, 1762, 276, 821, 1245, 2645, 2737, 2424], "8228": [2846, 3152, 1492, 1666, 653, 181, 846, 920, 1144, 1761, 760, 2709, 1387, 69, 1362, 390, 2645, 1147, 2734, 1876], "8479": [1051, 2060, 428, 2928, 2731, 2928, 920, 224, 3097, 1025, 3143, 1431, 1113, 2285, 2265], "5392": [1051, 307, 1902, 653, 1304, 757, 920, 224, 810, 2201, 2709, 635, 318, 276, 2677, 1147, 2184, 440], "8159": [1133, 1535, 1045, 2995, 861, 2484, 2063, 920, 224, 3097, 2445, 2645], "7159": [1521, 3152, 955, 861, 1955, 2330, 2814, 119, 451, 1134, 588, 257, 1796, 276, 2424, 2737, 1213, 350, 2734], "9412": [670, 1222, 1602, 653, 2668, 1649, 920, 224, 810, 1428, 2936, 2962, 2384, 2362, 1608, 2645, 2424, 2737, 1028, 1147], "3433": [2248, 2465, 2801, 2323, 1963, 2063, 920, 224, 3097, 706, 1656, 1968, 3061, 2384, 2424, 2737, 1147], "1482": [1554, 294, 1636, 861, 213, 1649, 920, 224, 810, 3142, 588, 1796, 276, 2645, 1213, 751], "2201": [194, 509, 452, 653, 2243, 1777, 920, 224, 810, 545, 1607, 201, 1764, 2479, 928, 569, 139, 822, 1762, 3051, 1245, 3044, 2480, 1530, 802, 2728], "3401": [2605, 3152, 2903, 861, 152, 1649, 920, 224, 810, 464, 588, 257, 569, 1796, 276, 1213, 751], "5407": [89, 2864, 2896, 653, 54, 653, 920, 224, 810, 553, 588, 1195, 257, 2362, 1796, 2424, 2737, 1213], "6339": [1726, 911, 2903, 861, 213, 757, 2814, 119, 451, 1119, 1013, 928, 1530, 1548, 257, 2912, 569, 2764, 2409, 1525, 2130, 1607, 1387, 139, 1796, 588, 635, 2724, 2545, 768, 1213, 3057], "5037": [1234, 3152, 2494, 2065, 888, 507, 976, 1034, 2323, 1501, 988, 2348, 3164, 773, 920, 1144, 1761, 760, 588, 257, 1796, 276, 1548, 1213], "9274": [1640, 3152, 29, 861, 489, 846, 920, 224, 3097, 706, 588, 257, 569, 1796, 1213, 1028, 1147, 2734], "6807": [1550, 911, 2, 2928, 1659, 846, 920, 224, 3097, 1989, 1028], "2971": [839, 3152, 1901, 861, 2200, 1174, 2814, 119, 1644, 2414, 635, 318, 2645, 276, 2184, 3057], "348": [2846, 421, 1465, 653, 2668, 2063, 920, 224, 810, 2101, 588, 1764, 257, 1895, 569, 3054, 859, 2656, 1570, 1796, 2645, 1245, 436, 3108, 1213, 1147, 2178], "396": [1550, 2060, 653, 1569, 861, 920, 224, 3097, 400, 2549, 2524, 83, 276, 2501, 440], "431": [454, 433, 861, 1974, 48, 920, 1144, 1761, 760, 440, 1147, 2384, 2936], "780": [3068, 1079, 861, 2591, 653, 920, 224, 810, 754, 2549, 2362, 3014, 2501, 2645, 768, 751], "148": [1550, 1417, 1081, 653, 1304, 2063, 920, 224, 3097, 706, 1108, 2737, 3054, 2168, 803, 276, 436, 2424, 2153, 502, 751], "2519": [1726, 1222, 2223, 2928, 473, 3023, 920, 224, 810, 1102, 635, 276, 2424, 2737, 1548, 1087], "4624": [670, 378, 593, 385, 861, 2484, 757, 920, 224, 3097, 400, 2612, 1764, 1387, 2936, 635, 569, 2384, 2724, 1245, 2409, 350, 2661], "8440": [1121, 1079, 305, 519, 2928, 2485, 48, 920, 1144, 1761, 760, 1656, 2737, 1764, 2660, 1013, 2617, 569, 750, 2764, 608, 318, 1245, 2424, 1530, 2341, 2113, 2184], "5878": [3040, 2918, 2346, 1177, 2928, 473, 846, 920, 224, 810, 2204, 1607, 1195, 928, 569, 2362, 276, 3044, 1530], "5149": [2248, 1417, 640, 2259, 861, 2857, 1649, 920, 224, 3097, 2151, 2549, 2524, 2936, 83, 569, 2384, 1362, 608, 2501, 821, 2645, 390], "8321": [89, 911, 1859, 861, 2433, 861, 920, 224, 3097, 329, 1607, 928, 569, 1530], "9114": [454, 2770, 2801, 2186, 846, 1881, 2063, 920, 224, 810, 2204, 2734, 257, 139, 569, 1912, 1525, 2130], "6279": [3048, 433, 3020, 1014, 2928, 1659, 48, 920, 224, 810, 1102, 2549, 2524, 928, 83, 2384, 2501, 2645, 2914, 1548, 1532], "6677": [438, 433, 1902, 2323, 676, 2063, 920, 224, 3097, 1001, 588, 2549, 2524, 1764, 257, 1213, 83, 1796, 276, 1245, 2424, 2645, 2737, 2501, 1295], "8402": [454, 2464, 964, 861, 213, 2063, 920, 224, 3097, 706, 1801, 2709, 1013, 806, 139, 2168, 1599, 2764, 2153, 2228, 1525], "6790": [2069, 911, 516, 653, 1275, 2063, 920, 224, 3097, 1989, 1895, 2015, 1147, 2914, 2737, 1548, 1876, 2912, 929, 2960, 569, 3054, 2656, 2424, 1431, 69, 1525, 780, 83, 1856, 855, 101, 704, 1839, 2178, 440, 2549, 2524, 2068, 2501, 436, 3019], "5638": [1726, 509, 1005, 653, 1225, 48, 920, 224, 3097, 400, 1391, 1895, 859, 1570, 1656, 257, 2960, 2912, 1559, 3054, 569, 2362, 2656, 802, 3019, 1525, 1195, 139, 855, 1796, 1839, 763, 2178, 440, 588, 436, 1213, 1147], "7622": [2605, 2770, 2851, 2240, 2323, 1963, 1649, 920, 224, 3097, 1889, 1548, 440, 1599, 2228, 2153], "2068": [2248, 1417, 1540, 861, 213, 2928, 920, 224, 3097, 1889, 1656, 2936, 569, 2384, 1228, 584, 2068, 2424, 2737, 440], "9149": [454, 1618, 1129, 861, 213, 3164, 920, 224, 3097, 2510, 635, 2384, 2645, 2936], "578": [438, 1417, 3022, 2418, 846, 673, 2928, 920, 224, 393, 588, 2732, 257, 139, 2362, 1796, 802, 1213], "5482": [2347, 165, 964, 653, 2668, 1085, 920, 224, 3097, 706, 1108, 2645, 2737, 1028, 486, 257, 569, 3054, 2362, 2424, 83, 803, 1796, 276, 502, 588, 2549, 2524, 2502, 2501, 436, 1213], "6538": [1951, 421, 480, 1162, 653, 2224, 48, 920, 224, 3097, 706, 1656, 2023, 3054, 569, 2902, 436, 2424, 2737, 2631, 1087], "6353": [1051, 509, 2223, 2698, 2928, 473, 3045, 920, 224, 810, 2201, 2936, 635, 2384, 276, 2409, 2661], "3090": [1726, 2918, 1045, 2757, 2928, 473, 3164, 920, 224, 3097, 706, 2709, 1387, 635, 2168, 569, 608, 2153], "2941": [308, 3152, 854, 653, 1304, 1777, 2814, 119, 451, 124, 1656, 1876, 2960, 2936, 139, 569, 3019, 2420, 2362, 276, 2424, 2737, 1548, 598, 69, 751, 2661], "8903": [194, 165, 28, 861, 152, 2282, 920, 224, 810, 2204, 2549, 2524, 2936, 83, 2384, 2501, 276], "2414": [2665, 2446, 273, 1931, 3084, 144, 846, 920, 1907, 2185, 1043, 276], "7428": [2598, 619, 846, 2787, 2282, 920, 224, 3097, 2642, 588, 1195, 257, 1895, 1013, 2936, 3054, 569, 2764, 2384, 2362, 2656, 1796, 436, 1213, 2677, 2178], "3830": [3048, 1079, 1053, 2928, 473, 2063, 920, 224, 810, 3142, 2384], "3322": [1051, 378, 305, 1269, 653, 210, 846, 920, 224, 3097, 706, 2549, 2524, 635, 1425, 83, 2501, 2645, 3108], "4206": [2248, 294, 2687, 2024, 861, 1114, 48, 920, 1144, 1761, 760, 2549, 2524, 1387, 2479, 83, 3054, 2902, 1762, 2501, 436, 3044], "8883": [2858, 1535, 396, 1360, 1047, 3127, 846, 920, 224, 3097, 1025, 1764, 139, 569, 928, 1245, 2424, 2737, 1505], "5079": [308, 3152, 1053, 861, 213, 1777, 920, 224, 3097, 1989, 2549, 2524, 588, 2734, 257, 1387, 2936, 83, 1796, 276, 2501, 2424, 2737, 1213, 1147, 1525, 751], "6552": [1234, 3152, 2928, 2600, 653, 920, 224, 3097, 400, 1656, 1013, 946, 1699, 2764], "9306": [2352, 378, 1540, 25, 653, 2243, 3164, 920, 224, 810, 1428, 2549, 2524, 751, 83, 2501, 2645, 276, 3057, 1505], "9138": [2665, 166, 2121, 1252, 3084, 48, 920, 224, 810, 1161, 1968, 1764, 3061, 855, 569, 704, 1245, 2424, 1431, 2737], "1989": [2554, 166, 29, 3084, 971, 861, 920, 224, 810, 2101, 1108, 928, 3054, 803, 318, 2645, 2424, 802, 2737, 436, 502, 2184], "9144": [3040, 378, 1872, 653, 524, 2928, 920, 1144, 1761, 760, 2549, 2524, 1391, 83, 139, 3004, 2645, 2501, 2409, 1147, 1260, 440], "4251": [2554, 294, 645, 2799, 2323, 725, 2063, 920, 224, 810, 1161, 2549, 2524, 1195, 1606, 83, 2823, 2362, 2501, 276, 2424, 3044, 2737], "4997": [438, 1191, 180, 653, 2243, 48, 920, 224, 810, 553, 1108, 3054, 803, 601, 276, 821, 2424, 436, 2737, 502], "7297": [1948, 3152, 955, 1400, 861, 425, 846, 920, 224, 2867, 588, 257, 569, 1796, 276, 2424, 2737, 1213], "8429": [1550, 221, 1680, 2909, 653, 359, 2323, 920, 1144, 1761, 760, 704, 3088, 69, 929, 1876], "1014": [1948, 640, 1373, 861, 152, 861, 920, 224, 3097, 2151, 1013, 569, 2764], "4461": [2598, 2446, 541, 265, 653, 1499, 2928, 920, 224, 810, 2204, 1108, 1387, 139, 3054, 803, 436, 502, 440], "3720": [1449, 1079, 2722, 2323, 2658, 1649, 920, 224, 810, 2204, 2534, 635, 2384, 822, 2409, 276, 1548, 2728, 1147, 2661], "4526": [1449, 1222, 955, 735, 653, 1539, 2282, 920, 224, 810, 394, 588, 2549, 2524, 257, 635, 83, 569, 608, 2362, 1796, 2501, 2645, 3044, 1213, 1147], "4250": [839, 509, 1129, 653, 2668, 1085, 920, 1907, 1612, 795, 2549, 2524, 2912, 2936, 635, 83, 2501, 2424, 2737, 1525, 2661], "381": [1133, 2770, 653, 359, 2928, 920, 224, 3097, 2510, 1195, 1432, 569, 2362, 1295, 3057], "9428": [3048, 378, 137, 861, 1974, 846, 920, 224, 3097, 1291, 1195, 1391, 2936, 2362, 440, 1147, 2661], "6078": [2665, 2770, 2941, 1507, 653, 784, 1085, 920, 224, 3097, 1025, 1548, 276, 2362], "8606": [2248, 307, 2223, 653, 2668, 1085, 920, 224, 3097, 706, 1895, 2479, 928, 1608, 2737, 2153, 1028, 257, 3054, 2319, 2656, 2362, 2424, 2130, 533, 2962, 2168, 540, 502, 2178, 2384, 1762, 436, 1147, 2734], "5059": [308, 3152, 1887, 2712, 1047, 2634, 3164, 920, 224, 3097, 400, 2549, 2524, 83, 569, 2501, 2645, 3108], "715": [2347, 433, 2121, 653, 3098, 1085, 920, 224, 3097, 400, 1548, 276, 2645], "4255": [2554, 619, 995, 2323, 2921, 1085, 920, 224, 810, 3142, 1656, 2936, 2384, 276, 1113, 768, 2265, 3143, 946, 2285], "4213": [2554, 2465, 134, 2928, 1659, 653, 920, 224, 810, 1919, 635, 139, 1260, 768], "8364": [1199, 2918, 2292, 656, 653, 359, 1649, 920, 224, 3097, 329, 2912, 2479, 1013, 2764, 1762, 2645, 2424, 2737, 1525], "1523": [2347, 2005, 861, 2484, 48, 920, 224, 810, 2204, 2549, 2524, 1391, 2936, 83, 2384, 2319, 276, 2501, 1147, 440], "5956": [2605, 619, 2223, 861, 213, 1085, 920, 224, 3097, 2767, 1968, 1195, 1108, 2773, 1387, 3061, 635, 3054, 803, 2362, 2724, 276, 802, 2424, 436, 2737, 502, 1028, 1147, 2734], "8108": [839, 509, 2346, 1423, 2928, 131, 1085, 920, 224, 3097, 706, 1607, 928, 569, 1530, 276, 2645, 2424, 2737], "2683": [1554, 2446, 262, 2202, 2928, 2518, 349, 920, 224, 3097, 2510, 1108, 859, 1570, 2914, 2153, 257, 3054, 2362, 3044, 2130, 83, 2168, 803, 502, 2549, 2524, 2936, 635, 2384, 2501, 436, 768, 1147], "7118": [2858, 1191, 580, 861, 425, 48, 920, 224, 3097, 706, 1968, 1108, 1764, 3061, 3054, 569, 2579, 803, 2645, 1245, 802, 436, 502, 3088, 751], "4494": [1726, 433, 949, 715, 846, 3103, 2282, 920, 224, 810, 2204, 569, 2362, 802, 2424, 2737, 1028, 1147, 2661], "410": [2846, 1713, 542, 861, 468, 2063, 920, 224, 810, 553, 569, 1113, 2724, 1844], "4669": [89, 1222, 1602, 861, 152, 2928, 920, 224, 810, 2204, 1147, 3044, 440], "1408": [2248, 1535, 1571, 861, 2611, 1649, 920, 224, 810, 2204, 588, 257, 2936, 2384, 1796, 2638, 1213, 2734], "1994": [2665, 509, 2346, 861, 213, 2282, 920, 224, 3097, 2642, 2677, 569, 763, 2362], "7864": [454, 378, 964, 861, 213, 1085, 920, 224, 3097, 706, 276, 2645, 1147], "5154": [839, 509, 189, 2373, 653, 181, 653, 920, 224, 3097, 1291, 1607, 928, 569, 2362, 1530, 3143, 2265, 1525], "1575": [1550, 221, 2223, 2928, 473, 1085, 920, 224, 810, 2204, 1656, 2549, 2524, 1108, 1764, 83, 569, 1362, 3054, 803, 608, 2501, 2645, 1245, 2424, 2737, 436, 502, 1147, 1505, 390], "422": [1051, 2464, 333, 861, 2845, 3062, 2814, 119, 1644, 2753, 1656, 440, 569, 1147], "4015": [515, 1943, 2256, 2504, 507, 861, 1114, 1315, 653, 505, 920, 1144, 1761, 760, 588, 2617, 569, 1682, 1796, 1353, 1213], "3559": [454, 1535, 967, 653, 1225, 2063, 920, 224, 810, 3142, 2549, 2524, 2534, 1391, 1013, 83, 2384, 2764, 2501, 2645, 1147, 751, 440], "7384": [2665, 1222, 787, 1047, 644, 1047, 920, 224, 3097, 1025, 588, 2524, 2549, 257, 1505, 83, 1796, 318, 2645, 2424, 2501, 2737, 3044, 1213, 276, 2184, 751], "7652": [2347, 166, 642, 2159, 514, 2928, 2496, 2489, 2928, 1605, 920, 1907, 1612, 2327, 569, 1113], "2778": [839, 2446, 979, 2323, 1963, 48, 920, 224, 3097, 400, 2549, 1968, 2524, 1387, 3061, 83, 1362, 2724, 2501, 2645, 2424, 2737, 390], "3283": [1951, 421, 1937, 2928, 2485, 349, 920, 224, 3097, 706, 1895, 2936, 139, 3054, 569, 2384, 2656, 436, 2914, 2178], "7232": [308, 3152, 2281, 3101, 653, 54, 1174, 920, 224, 3097, 706, 2115, 1195, 2534, 257, 1645, 139, 569, 1787, 2168, 853, 2362, 2384, 704, 2545, 768, 1113, 2153, 3044, 1844, 2661], "6967": [89, 1191, 193, 842, 1047, 2690, 861, 920, 1144, 1761, 760, 929, 139, 569, 1912, 2362, 1113, 2409, 69, 1525, 440], "5606": [2665, 1417, 1636, 861, 152, 653, 920, 224, 3097, 400, 2384, 2936], "4928": [515, 294, 3047, 660, 989, 846, 2639, 1058, 861, 3150, 920, 1907, 1612, 2327, 1195, 1710, 2362], "3715": [2347, 1191, 1254, 653, 1304, 757, 920, 224, 810, 2101, 1108, 2645, 2153, 2737, 257, 929, 3054, 318, 802, 1431, 2424, 69, 946, 2184, 751, 2534, 1387, 139, 855, 2168, 803, 704, 1796, 276, 502, 588, 2384, 436, 1213, 1147, 3057], "570": [2665, 433, 3122, 653, 2243, 1649, 920, 224, 810, 2204, 2990, 928, 1231, 1530, 1295, 1028, 486, 1505, 1876, 2661, 650, 929, 569, 2362, 802, 1113, 1431, 3044, 598, 69, 1525, 946, 1607, 855, 704, 1796, 276, 440, 588, 2502, 768, 1213], "6818": [1948, 3152, 1045, 2928, 1659, 653, 920, 224, 3097, 400, 2534, 1108, 2406, 3054, 2384, 803, 436, 2645, 802, 502], "5751": [1133, 2918, 964, 861, 213, 3164, 920, 224, 3097, 706, 635, 1013, 533, 569, 2384, 2764, 318, 2184], "549": [1121, 1618, 653, 1304, 2063, 920, 224, 810, 2964, 1195, 635, 569, 2362, 276, 1147, 751, 440], "1579": [2347, 1535, 861, 152, 48, 920, 224, 810, 272, 588, 257, 1387, 569, 2724, 2362, 1796, 2424, 2737, 1213, 1028, 1147, 2734], "6726": [1133, 3152, 848, 2928, 2485, 846, 920, 224, 810, 754, 1656, 929, 1387, 569, 2168, 2724, 2362, 704, 2153, 1028, 69], "4901": [2248, 2465, 1902, 2308, 2928, 473, 48, 920, 224, 810, 394, 2728, 2424, 768, 822, 2737], "4871": [3040, 2464, 1152, 653, 2668, 861, 920, 224, 810, 3142, 1525, 139, 2545, 768, 2912], "4815": [194, 2446, 964, 653, 2243, 3164, 920, 224, 3097, 706, 1656, 588, 2549, 2524, 3057, 257, 1013, 83, 569, 2764, 2362, 1796, 276, 2501, 2424, 2737, 1213, 1028, 763, 751], "4881": [1951, 2770, 1226, 3111, 861, 1114, 2928, 920, 224, 3097, 2510, 2502, 2912, 1525, 821, 2424, 2737, 486], "3734": [1521, 1191, 541, 861, 425, 3045, 2814, 119, 1644, 2208, 2549, 2524, 83, 276, 2501, 2734], "2313": [2846, 2060, 17, 844, 861, 1114, 2928, 920, 1144, 1761, 760, 1968, 3061, 139, 802, 2645, 1028, 1147], "958": [2605, 2918, 1053, 861, 184, 2003, 2814, 119, 451, 957], "1927": [1133, 2464, 51, 2522, 827, 653, 181, 2010, 3164, 1257, 920, 1907, 1612, 2327, 635, 2677, 569, 763, 139], "8551": [2248, 2446, 1937, 861, 2297, 846, 920, 224, 3097, 1291, 2645, 1505], "7096": [1948, 421, 846, 759, 2282, 920, 224, 810, 569, 2661], "2462": [839, 911, 143, 1782, 861, 152, 861, 920, 224, 3097, 706, 2737, 569, 2168, 2362, 2424, 3044, 2153, 1147, 1525], "5412": [2347, 476, 60, 846, 2127, 1085, 920, 224, 3097, 400, 2549, 2524, 83, 569, 859, 1570, 2501, 751], "4406": [2248, 421, 955, 653, 1777, 920, 224, 3097, 706, 1656, 2524, 2549, 1342, 2936, 83, 2384, 2638, 276, 2501], "9006": [2846, 1696, 2223, 861, 213, 1649, 920, 224, 810, 1369, 588, 257, 2936, 1645, 569, 2384, 1796, 2914, 1213], "4340": [1449, 2465, 128, 2114, 861, 2611, 2063, 920, 224, 810, 394, 1656, 326, 1391, 1895, 928, 569, 3054, 139, 2362, 2656, 381, 3014, 440, 436, 2676, 1147, 2178, 2661], "6350": [1051, 2446, 2928, 131, 861, 920, 224, 810, 2204, 588, 1108, 257, 2912, 1213, 3054, 569, 803, 1796, 2645, 436, 502, 1147, 1525], "5033": [1550, 509, 3084, 2022, 1085, 920, 224, 3097, 706, 1764, 1342, 569, 2638, 276, 1245, 751], "1731": [2598, 1222, 887, 861, 152, 2063, 920, 224, 810, 2204, 1656, 2709, 2912, 1013, 2343, 2764, 2362, 276, 768, 1525, 440], "6908": [2846, 2918, 640, 861, 2484, 846, 920, 224, 3097, 400, 1147, 2153, 908, 257, 2960, 929, 2912, 569, 2362, 802, 69, 1525, 751, 2130, 139, 2168, 704, 276, 440, 635, 2384, 608, 3088, 3019, 3057], "5877": [1521, 1222, 861, 2484, 3164, 920, 224, 3097, 2510, 1764, 929, 1013, 533, 3054, 569, 2764, 2902, 2362, 704, 1245, 802, 3044, 436, 69, 1525], "6657": [2554, 684, 591, 1486, 1354, 2928, 1605, 2928, 1376, 920, 1144, 1761, 760, 588, 257, 139, 2362, 1796, 2424, 2737, 1213, 1028, 1147], "609": [454, 1618, 1081, 861, 2611, 2063, 920, 224, 3097, 706, 276, 2384, 2645, 1387], "7062": [1449, 2770, 1081, 2928, 473, 757, 920, 224, 3097, 1997, 1013, 2163, 2645, 2737, 1548, 1656, 257, 569, 2764, 802, 2424, 2612, 83, 1796, 276, 763, 588, 2524, 2549, 2936, 635, 2384, 608, 2501, 2545, 1213], "3477": [1234, 3152, 640, 861, 2484, 861, 920, 224, 3097, 2510, 2549, 2524, 1108, 83, 3054, 803, 2501, 2645, 436, 502, 1028, 1147, 2734], "3304": [1051, 1417, 1540, 653, 54, 3164, 920, 224, 3097, 706, 1764, 751, 569, 802, 1245, 2677, 3057], "4758": [1199, 1417, 146, 653, 210, 3164, 920, 224, 3097, 2009, 853], "7244": [670, 911, 29, 861, 2484, 3164, 920, 224, 393, 2512, 2549, 2524, 83, 2501], "5071": [670, 1222, 787, 1067, 2928, 1659, 653, 920, 224, 3097, 1291, 588, 2732, 257, 2962, 2362, 1796, 276, 802, 318, 1608, 1213, 1854, 2184], "6405": [670, 2918, 955, 861, 1955, 1174, 2814, 119, 1644, 1370, 1195, 569, 2362, 276, 2424, 2737, 2409, 2661], "7347": [1550, 2770, 1937, 2571, 861, 621, 3164, 920, 224, 3097, 1889, 588, 1764, 257, 2660, 1013, 139, 569, 2168, 2764, 2384, 1796, 1732, 2645, 1245, 2153, 1213], "7552": [2846, 1713, 2121, 2928, 2899, 861, 920, 1907, 1612, 2327, 139, 569, 2424, 751, 2737], "3664": [670, 2465, 2090, 1327, 2928, 2485, 48, 920, 224, 810, 3142, 821, 2645, 3057], "1850": [2598, 1079, 964, 653, 2243, 861, 920, 224, 810, 2204, 2660, 1013, 2384, 2764, 2645, 751], "78": [1051, 2465, 653, 2243, 2063, 920, 224, 810, 3142, 1195, 1387, 569, 2724, 2362, 2645, 2424, 2737, 2409, 1028, 2734], "4566": [2665, 433, 2346, 653, 1740, 1777, 920, 224, 3097, 2642, 588, 257, 2912, 1387, 1796, 318, 276, 1213, 3057, 1525, 2184, 2734], "2296": [839, 619, 50, 653, 1093, 1085, 920, 224, 3097, 400, 569, 2168, 859, 1570, 2153, 763], "1557": [515, 221, 2963, 861, 2260, 2063, 920, 1907, 2185, 1043, 1656, 2534, 1013, 139, 2384, 2764, 859, 1570, 2424, 2737], "8501": [1948, 2928, 1659, 48, 920, 224, 810, 14, 2549, 2524, 1195, 2962, 635, 928, 83, 2362, 1147, 3051, 1608, 802, 2501, 1627, 440], "276": [1951, 3152, 1567, 861, 152, 846, 920, 224, 3097, 329, 326, 1308, 1599, 859, 828, 853, 1570, 2153, 2676, 1481, 1876, 1656, 1453, 2023, 257, 929, 191, 569, 2478, 2362, 2409, 69, 1525, 1195, 2913, 2275, 2991, 1471, 139, 2168, 916, 704, 3004, 2228, 2335, 440, 966, 921, 2384, 2068, 768, 3108, 2943, 1147, 1260], "4874": [3040, 509, 794, 846, 2815, 3164, 920, 224, 810, 394, 1968, 1195, 1108, 1505, 635, 3061, 3054, 803, 2645, 2424, 436, 2737, 502, 751], "6618": [1951, 3152, 2223, 653, 2243, 2282, 920, 224, 810, 1102, 2549, 2524, 2960, 2912, 1895, 635, 83, 3054, 139, 2656, 1147, 318, 2645, 276, 2501, 436, 2409, 3019, 1525, 2184, 2178], "3261": [1554, 221, 1254, 2928, 1659, 653, 920, 224, 810, 2204, 2549, 2524, 2737, 83, 2168, 2362, 2501, 2424, 2153, 1505], "6304": [670, 1535, 3047, 861, 1866, 846, 241, 920, 1907, 1612, 2327, 1195, 2709, 929, 2420, 2362, 704, 69], "207": [2858, 509, 964, 861, 152, 3023, 920, 224, 3097, 2767, 1607, 2524, 2549, 1387, 928, 569, 83, 2724, 276, 2645, 2501, 1530], "4139": [1234, 3152, 3013, 861, 1955, 3062, 2814, 119, 1644, 1850, 2015, 928, 2645, 1530, 2737, 1548, 1028, 1505, 257, 569, 1912, 2362, 318, 1245, 1431, 2424, 802, 1213, 1525, 2184, 1607, 2734, 1342, 1387, 139, 855, 704, 1796, 276, 1839, 1211, 588, 1764, 2724, 2638, 768, 1295, 1147, 1509, 3057], "5934": [515, 294, 3047, 3109, 653, 2322, 1694, 861, 2938, 920, 1907, 1612, 2327, 2409, 276, 2645, 3149, 2661], "1259": [2605, 2770, 2323, 2070, 48, 920, 224, 810, 1102, 2912, 2645, 2424, 2737, 1147, 1525], "1542": [308, 3152, 2223, 653, 1304, 3023, 920, 224, 3097, 2642, 635, 318, 2424, 2737, 1548, 2184], "3718": [1554, 1535, 955, 2928, 131, 2063, 920, 224, 810, 394, 2612, 569, 608, 2947, 2645, 2914, 3004, 1260, 2631], "3185": [2069, 166, 964, 861, 213, 846, 920, 224, 3097, 706, 1607, 1108, 2737, 928, 3054, 569, 2168, 803, 1530, 436, 2424, 2153, 502], "1658": [1449, 911, 1463, 653, 846, 920, 224, 2798, 2064, 2732, 1764, 569, 1245, 2645, 2424, 751], "2505": [3040, 166, 1540, 861, 213, 1649, 920, 224, 393, 2391, 588, 257, 1895, 1387, 3054, 2178, 2362, 2656, 1796, 2645, 436, 1213, 1028, 2734], "1937": [2605, 216, 3022, 653, 1569, 1649, 920, 1907, 1612, 795, 1548, 928, 276, 2384, 751], "286": [1051, 2464, 964, 846, 759, 1085, 920, 224, 3097, 400, 1607, 1195, 1606, 928, 569, 2362, 1530, 1147], "1414": [1449, 509, 1053, 2928, 1884, 2063, 920, 224, 3097, 400, 1075, 2912, 635, 569, 2061, 2362, 1028, 1525, 763], "2229": [515, 165, 2831, 653, 2243, 861, 920, 224, 3097, 706, 257, 2578, 1856, 276, 1548, 946, 2130], "4991": [2858, 2770, 838, 2515, 861, 2611, 861, 920, 224, 810, 918, 1607, 928, 569, 1530, 318, 2424, 768, 2737, 2184, 3057], "7387": [308, 3152, 899, 2928, 1605, 2928, 920, 224, 3097, 2510, 1548, 1228, 2424, 2737, 584], "6933": [1521, 3152, 1680, 653, 359, 48, 920, 1144, 1761, 760, 1656, 1764, 929, 2479, 2962, 2936, 569, 1362, 2384, 704, 1762, 1608, 318, 1245, 2424, 2737, 69, 2184, 1505, 390], "2064": [2665, 2060, 1920, 861, 2611, 2330, 2814, 119, 1644, 2208, 1391, 3061, 2737, 1548, 1075, 257, 569, 2362, 2424, 1195, 83, 139, 2061, 1796, 276, 440, 2549, 1968, 2524, 588, 635, 2501, 1213, 1147], "2894": [1951, 2770, 964, 861, 213, 2282, 920, 224, 3097, 1889, 2549, 2524, 83, 928, 2501, 276, 2645, 1627], "1511": [1554, 216, 1902, 861, 2611, 3164, 920, 224, 3097, 706, 1656, 588, 1223, 1108, 257, 1213, 1548, 569, 3054, 2478, 803, 1796, 276, 436, 2409, 502, 2677, 2335, 2661], "7338": [2347, 2465, 964, 1400, 861, 1955, 3023, 920, 224, 3097, 706, 588, 1195, 257, 635, 2362, 1796, 276, 1113, 1213], "8450": [1948, 3152, 964, 846, 1881, 846, 920, 224, 3097, 706, 588, 257, 2936, 635, 139, 3054, 2384, 2902, 1796, 436, 2645, 1213], "4710": [1726, 911, 29, 861, 2484, 861, 920, 224, 3097, 2510, 2936, 139, 805, 2384, 2039, 2638], "7690": [1951, 3152, 2903, 653, 2668, 1047, 920, 224, 810, 2204, 1656, 929, 569, 704, 2645, 69, 1876], "7533": [3048, 1535, 2818, 846, 3103, 1085, 920, 224, 810, 3142, 440], "3017": [3040, 2446, 1798, 861, 736, 653, 920, 224, 3097, 1291, 2549, 2524, 83, 2501, 2645, 2424, 2737, 751], "4374": [1550, 3152, 3047, 1201, 403, 2928, 1605, 653, 1996, 920, 1907, 2302, 896, 1968, 2479, 3061, 635, 1762, 276, 3044, 2424, 2737], "3168": [1640, 1417, 2801, 2769, 861, 152, 48, 920, 224, 3097, 706, 1656, 2335, 2502, 2015, 635, 928, 569, 855, 704, 276, 2645, 1431, 2424, 2737, 1839, 1627, 486, 751], "3674": [2069, 1222, 349, 2412, 2928, 920, 224, 810, 3142, 588, 257, 1796, 2424, 2737, 1213], "7165": [2069, 1535, 2121, 846, 1881, 3164, 920, 1907, 2185, 1043, 2549, 2524, 588, 257, 929, 3032, 635, 83, 139, 2319, 1796, 2501, 1213, 69, 2238, 751, 440], "1422": [2554, 216, 1540, 653, 2668, 3164, 920, 224, 810, 1369, 1656, 569], "6914": [3048, 509, 70, 653, 2243, 1085, 920, 224, 3097, 400, 1195, 929, 2912, 533, 1362, 276, 2424, 2737, 69, 1525, 390], "6758": [89, 1222, 1636, 2928, 1659, 2063, 920, 224, 3097, 1025, 1968, 1764, 3061, 569, 3054, 2902, 276, 1245, 2424, 436, 2737], "7410": [3068, 1222, 1937, 861, 213, 349, 920, 224, 3097, 1889, 139, 569, 1856], "4443": [515, 1222, 353, 861, 3145, 653, 920, 224, 810, 970, 1843, 569, 2061, 2424, 2737, 2409, 1525, 2679, 2661], "7980": [2352, 476, 712, 861, 425, 510, 2814, 119, 1644, 2208, 1895, 2015, 2153, 1028, 2661, 1656, 257, 2912, 3054, 569, 2656, 2362, 802, 1525, 1945, 1195, 1387, 2168, 1796, 1839, 2178, 588, 2936, 2902, 2724, 436, 768, 1213, 1147], "3825": [670, 684, 1830, 861, 107, 2063, 920, 224, 810, 602, 1764, 3057, 569, 1245, 2424, 3044, 2737, 1420, 2136, 751], "7830": [1449, 2446, 1798, 2928, 1659, 48, 920, 224, 3097, 1025, 2549, 2524, 83, 569, 2501, 821, 2645], "8009": [2858, 1618, 1045, 715, 653, 210, 653, 920, 224, 3097, 706, 635, 2384, 3044], "8842": [1051, 509, 628, 846, 1122, 3023, 920, 224, 3097, 2642, 588, 2549, 2524, 1108, 257, 1387, 1213, 139, 3054, 83, 803, 350, 2724, 1796, 2501, 436, 2424, 2737, 502, 1028, 1147], "1137": [2347, 1535, 2979, 653, 48, 920, 1907, 2185, 1043, 1195, 447, 2384, 318, 768, 2184], "1665": [3068, 1079, 2346, 653, 2243, 3164, 920, 224, 810, 918, 2039, 2645, 1525, 2912], "5183": [1640, 1417, 2494, 2065, 888, 507, 976, 1034, 3084, 1182, 653, 1284, 742, 998, 920, 1144, 1761, 760, 1074, 1656, 430, 2760, 1431, 1548, 751], "8077": [3048, 294, 49, 1361, 861, 231, 1649, 920, 1144, 1761, 760, 2549, 2524, 83, 2168, 643, 2501, 3044, 1548], "3866": [1234, 3152, 1053, 861, 213, 3164, 920, 224, 810, 2201, 635, 569, 3044], "245": [454, 509, 1636, 1388, 861, 213, 861, 920, 224, 3097, 1997, 588, 2524, 929, 2936, 675, 569, 859, 2362, 828, 1147, 1570, 1796, 2684, 1431, 2194, 1213, 69, 1710], "4609": [2598, 1222, 2121, 653, 1312, 861, 920, 1907, 1612, 2327, 635, 2645], "4532": [2605, 1696, 79, 2149, 653, 1539, 2003, 920, 224, 810, 1102, 1391, 2936, 1013, 1387, 2764, 2724, 440, 276, 2424, 2737, 1147, 2661], "6263": [1121, 226, 787, 653, 511, 2063, 920, 224, 3097, 706, 2549, 2524, 83, 1362, 276, 2645, 2424, 2501, 2737, 751, 390], "4320": [1133, 1713, 541, 653, 1304, 2330, 2814, 119, 451, 124, 1391, 2737, 2936, 2962, 635, 3054, 2168, 2384, 2902, 2362, 1608, 802, 2424, 276, 2153, 436, 1028, 1147, 440], "1003": [2347, 226, 955, 2928, 473, 2003, 2814, 119, 451, 957, 1656, 588, 2737, 257, 780, 1764, 1013, 2936, 569, 2168, 2764, 2384, 1796, 276, 1245, 2424, 2153, 1213], "2774": [1121, 433, 2984, 846, 3103, 2282, 920, 224, 3097, 1989, 588, 2734, 257, 929, 1213, 675, 704, 1796, 276, 2194, 3044, 440, 2661, 1295, 69, 908, 3057, 1876], "8444": [1234, 3152, 1238, 1047, 2452, 48, 920, 224, 3097, 329, 1656, 276, 821, 2645, 751, 440], "3643": [1449, 2918, 580, 2928, 2485, 3084, 920, 224, 3097, 2767, 1895, 3054, 569, 2656, 2362, 2645, 802, 436, 1147, 2178], "6268": [2069, 1417, 2482, 2045, 507, 653, 1862, 861, 246, 920, 1907, 2302, 896, 588, 257, 635, 139, 1796, 318, 802, 821, 2409, 1213, 2184, 2661], "1050": [1726, 2060, 838, 71, 653, 600, 3023, 920, 224, 2867, 2513, 1656, 2479, 139, 2168, 1762, 276, 2153], "4495": [2605, 2770, 591, 2074, 989, 846, 2639, 3084, 920, 1144, 1761, 760, 1074, 508, 257, 2936, 2962, 1699, 569, 2384, 430, 822, 2760, 1147, 2728, 2335, 2661], "1182": [1948, 421, 3020, 861, 152, 1649, 920, 224, 810, 3142, 440], "3020": [1726, 619, 2548, 861, 2484, 757, 920, 224, 3097, 2510, 2549, 2524, 257, 751, 83, 276, 2501, 2424, 2737, 1548, 2130], "9455": [2665, 2446, 3022, 2152, 846, 673, 2063, 920, 224, 3097, 400, 2936, 1843, 460, 2113, 2679, 2661], "1016": [1133, 1713, 937, 1788, 3084, 971, 2323, 920, 224, 3097, 706, 1656, 977, 24, 139, 569, 2384, 2501], "2821": [1550, 1191, 29, 2850, 2928, 473, 1649, 920, 224, 3097, 1997, 3061, 928, 2645, 1530, 2737, 1656, 257, 569, 1245, 2424, 1607, 83, 1796, 763, 588, 1968, 2549, 2524, 1764, 2384, 2501, 1213, 1147], "4293": [1948, 3152, 1294, 861, 2484, 1649, 920, 1907, 2185, 2538, 344, 2617, 569, 2384, 2362, 2728, 2894], "1363": [839, 1417, 2082, 861, 152, 861, 920, 224, 3097, 1025, 1147, 1028, 276, 2362], "8677": [308, 3152, 1636, 653, 2224, 2928, 920, 224, 3097, 706, 929, 1387, 635, 2168, 569, 608, 2153, 69], "1913": [515, 221, 289, 861, 960, 3023, 920, 224, 3097, 2151, 1074, 1656, 257, 2936, 2384, 2570, 430, 2760, 2130, 2661], "185": [1199, 619, 1045, 2597, 2928, 1659, 1047, 920, 224, 3097, 1025, 1108, 2015, 1147, 257, 2960, 929, 3054, 569, 802, 1431, 69, 1387, 139, 855, 803, 704, 1796, 1839, 276, 502, 588, 635, 436, 1213, 3019], "9246": [1948, 1565, 1540, 658, 861, 489, 2282, 920, 224, 810, 1102, 2549, 2524, 588, 257, 83, 1362, 1796, 2501, 2645, 1213, 751, 390], "2967": [2554, 619, 42, 2149, 653, 2243, 2003, 920, 224, 810, 918, 2549, 2524, 1387, 635, 83, 2724, 276, 2645, 2424, 2501, 2737], "8644": [1521, 2142, 2801, 2308, 846, 2003, 920, 224, 810, 1965, 1656, 2732, 139, 569, 1912, 2362, 1028, 1525, 1481], "2508": [2846, 1713, 593, 861, 2484, 1649, 920, 224, 810, 2234, 2409], "9387": [1550, 2770, 964, 2928, 2012, 3164, 920, 224, 3097, 706, 588, 1764, 257, 569, 1796, 1245, 2645, 1213, 1505], "5018": [1051, 1222, 1381, 927, 989, 653, 181, 1244, 1047, 182, 920, 1144, 1761, 760, 440, 1147, 2645, 2424, 2737], "1892": [1449, 1670, 1540, 861, 213, 2282, 920, 224, 3097, 706, 1391, 1895, 2153, 139, 3054, 2168, 2178, 2656, 2362, 704, 3051, 436, 3044, 1113, 2265, 3143, 1147, 1525, 2285, 440], "8574": [670, 1417, 2984, 653, 1569, 861, 920, 224, 3097, 400, 929, 2912, 139, 569, 704, 3044, 69], "6064": [454, 1943, 357, 861, 468, 861, 920, 1907, 1612, 2777, 2990, 2959, 1691, 928, 1231, 1570, 2341, 1453, 257, 929, 569, 2362, 1113, 598, 69, 2130, 2537, 139, 855, 1471, 704, 1796, 2839, 2614, 588, 2936, 2384, 608, 1762, 2711, 768, 1213, 2771], "3578": [438, 2864, 630, 2257, 861, 2484, 653, 920, 224, 3097, 706, 588, 257, 2936, 635, 2384, 1796, 2645, 1213], "3428": [308, 3152, 2797, 861, 2124, 48, 920, 224, 3097, 1997, 1656, 1764, 139, 569, 802, 1245, 3044, 2880, 763], "1943": [308, 3152, 1830, 2928, 2012, 1777, 920, 224, 3097, 1997, 588, 1391, 257, 1387, 569, 608, 2724, 1796, 2645, 1213, 1147, 440], "6729": [1051, 911, 29, 861, 2484, 861, 920, 224, 3097, 706, 1013, 569, 2645, 2764, 1147], "5359": [2347, 1222, 1294, 846, 1881, 2003, 920, 224, 3097, 1001, 2384, 2936], "1070": [2554, 294, 861, 2484, 3164, 920, 224, 3097, 1025, 2936, 2962, 569, 2384, 1608, 2424, 2737, 1525], "5944": [3068, 221, 640, 653, 210, 3164, 920, 224, 3097, 400, 588, 257, 2362, 1796, 276, 2645, 1213, 1028], "4416": [1133, 294, 591, 1486, 1354, 861, 960, 1339, 3164, 2993, 920, 1907, 1612, 2327, 1656, 2534, 635, 569, 2384, 608, 2409, 2661], "7542": [670, 166, 964, 653, 2243, 1085, 920, 224, 3097, 706, 1108, 2479, 2645, 2737, 486, 257, 2912, 3054, 3044, 2424, 1525, 751, 1387, 803, 1796, 502, 588, 2502, 2724, 1762, 436, 1213], "2722": [3068, 476, 1902, 861, 213, 846, 920, 224, 810, 2201, 635, 569, 2384, 2936], "6038": [454, 1943, 899, 2024, 653, 181, 2323, 920, 1144, 1761, 760, 569], "4024": [89, 221, 864, 2323, 1967, 861, 920, 1907, 1612, 2327, 2990, 1656, 1195, 1764, 569, 1231, 2384, 2362, 3004, 1245, 1113, 1147, 1260], "6883": [2846, 2142, 2140, 861, 2611, 48, 920, 224, 3097, 1889, 2990, 2023, 2912, 569, 1231, 608, 276, 1113, 1147, 1525, 440], "3414": [1051, 2060, 964, 846, 759, 2063, 920, 224, 3097, 1889, 1195, 929, 2936, 569, 2384, 584, 1228, 2362, 704, 276, 1548, 69, 2894, 440], "6331": [1234, 3152, 2481, 653, 1569, 2063, 920, 224, 3097, 1989, 1387, 3054, 569, 2902, 608, 318, 436, 2645, 2184], "7447": [89, 294, 964, 653, 1539, 757, 920, 224, 3097, 2767, 928, 2384, 2362, 318, 276, 2424, 2737, 1028, 1147, 2184, 2734], "832": [89, 294, 2430, 656, 846, 2639, 846, 920, 1144, 1761, 760, 1108, 2936, 3054, 2384, 803, 436, 3044, 502, 2771], "5065": [1554, 509, 1592, 861, 1974, 653, 920, 224, 3097, 2510, 2549, 2524, 1391, 83, 2501, 2645, 1147, 440], "9260": [1951, 2770, 709, 653, 181, 861, 920, 224, 3097, 400, 1548], "5650": [1521, 1535, 2801, 861, 468, 1085, 920, 224, 3097, 1001, 588, 1213, 1796, 569, 257], "8455": [1449, 226, 707, 2323, 725, 3084, 920, 1144, 1761, 760, 1108, 635, 3054, 803, 436, 2645, 502], "6583": [2665, 294, 642, 507, 861, 736, 653, 920, 1907, 1612, 2327, 1607, 2549, 2524, 2936, 83, 928, 569, 2501, 1530, 2661], "6511": [1234, 3152, 60, 861, 2484, 48, 920, 224, 3097, 400, 2384, 2362], "3984": [670, 2446, 1301, 861, 213, 2282, 2814, 119, 451, 957, 2549, 2524, 83, 2501, 821, 276, 2645], "7526": [1449, 1713, 262, 653, 1225, 3164, 920, 224, 3097, 329, 2534, 1147, 2384, 608, 440], "4627": [2846, 421, 2281, 2323, 2070, 1649, 920, 224, 3097, 1889, 139, 836, 1599, 2228, 2362, 2384, 276, 3044, 2153, 2409, 1295, 2661], "5996": [454, 2060, 1902, 861, 2484, 2063, 920, 224, 3097, 400, 2549, 2524, 1387, 83, 569, 2501, 276, 2645, 2424, 2737, 2734], "6205": [2069, 378, 2052, 2133, 861, 213, 861, 920, 224, 3097, 1889, 2990, 2524, 2549, 1108, 83, 2168, 1231, 3054, 803, 2501, 436, 1113, 2153, 502], "2562": [839, 1222, 1083, 2928, 495, 3164, 920, 224, 810, 1161, 3161, 2728, 569, 822, 276], "9033": [515, 294, 2223, 2048, 2323, 2897, 861, 920, 224, 2867, 1038, 69, 139, 569, 929, 2362], "5089": [438, 2464, 1318, 861, 1955, 691, 2814, 119, 1644, 2208, 1656, 569, 2384, 2362, 276, 2424, 3044, 2737, 1147], "3451": [3068, 1191, 964, 653, 1093, 3164, 920, 224, 3097, 400, 2549, 2524, 1108, 2479, 83, 3054, 803, 1762, 2501, 2645, 2424, 436, 2737, 502], "6313": [438, 433, 1883, 653, 856, 861, 920, 224, 3097, 400, 139, 1147, 2362], "6253": [1521, 421, 357, 653, 3017, 1649, 920, 1907, 1612, 2777, 2409, 2274, 2661, 2645, 2362], "4466": [2248, 378, 2354, 1127, 846, 673, 3164, 920, 224, 3097, 329, 1656, 1108, 257, 2936, 2384, 1228, 584, 440, 2728, 2130, 2661], "6590": [1550, 1618, 1883, 861, 2669, 48, 920, 224, 3097, 400, 2549, 2524, 83, 569, 2501, 2645, 3044], "3823": [3068, 216, 580, 653, 2243, 3164, 920, 224, 3097, 706, 588, 1108, 257, 1213, 3054, 569, 803, 1796, 276, 436, 2424, 2737, 502, 751, 440], "5409": [1726, 2465, 715, 861, 2484, 2063, 920, 224, 810, 2101, 1656, 2912, 2479, 1387, 569, 1362, 2362, 1762, 2645, 2424, 2737, 1295, 1028, 1525, 751, 390], "6082": [89, 476, 1828, 653, 1944, 1085, 920, 224, 3097, 2767, 1075, 2960, 2912, 1342, 139, 2061, 1599, 2638, 318, 276, 1431, 2153, 1548, 3019, 1525, 2184, 1945, 2228], "1237": [1234, 3152, 1902, 2928, 131, 48, 920, 224, 3097, 706, 2549, 2524, 588, 257, 1387, 2936, 635, 83, 569, 2384, 1213, 2724, 2362, 1796, 2501, 2645, 802, 2728, 1028, 1147], "5992": [2347, 2446, 2801, 3154, 653, 1093, 2063, 920, 224, 810, 1102, 1108, 2645, 2737, 1028, 1505, 3054, 2362, 318, 802, 2424, 2184, 83, 139, 803, 276, 502, 2549, 2524, 2936, 635, 2384, 2501, 436, 2734], "1038": [2665, 1535, 2052, 861, 152, 1085, 920, 224, 3097, 400, 2549, 2524, 83, 2501, 276, 2424, 2737], "8587": [1234, 3152, 516, 653, 210, 2282, 920, 1907, 2185, 1043, 2936, 635, 569, 2645, 2424, 2737, 2661], "703": [2846, 684, 964, 362, 653, 1539, 3164, 920, 224, 393, 2810, 2732, 1895, 635, 3054, 569, 2656, 2645, 436, 1854, 1525, 2178], "1313": [308, 794, 861, 1320, 846, 920, 224, 3097, 400, 1607, 929, 928, 569, 1530, 69], "1533": [670, 1417, 835, 653, 2668, 2282, 920, 224, 810, 2204, 2534, 2709, 929, 2936, 2015, 321, 635, 569, 2384, 1147, 704, 2126, 1839, 2645, 2424, 2737, 2677, 69, 1986, 751], "121": [454, 2864, 955, 653, 1093, 1777, 920, 224, 3097, 2642, 1108, 2737, 1764, 2479, 1013, 635, 139, 569, 3054, 2764, 2168, 803, 1762, 276, 1245, 802, 2424, 2153, 436, 502], "2831": [2858, 911, 1540, 2323, 1963, 1649, 920, 224, 810, 394, 588, 1968, 257, 3061, 1362, 2362, 1796, 2424, 768, 2737, 1213, 1028, 390], "555": [308, 3152, 1047, 3129, 653, 920, 224, 3097, 329, 635, 2645, 1562], "2976": [2347, 2464, 964, 2148, 2928, 473, 3164, 920, 224, 810, 2204, 1607, 257, 1342, 533, 139, 928, 569, 2638, 318, 1530, 2184, 2130], "1194": [1951, 3152, 629, 861, 1546, 3164, 920, 224, 3097, 1997, 1691, 2737, 1548, 1656, 257, 2912, 569, 3054, 802, 2424, 1525, 83, 101, 1796, 276, 2549, 2524, 588, 2384, 2902, 2501, 436, 1213], "1991": [1234, 3152, 3022, 861, 1974, 861, 920, 224, 3097, 400, 569, 2362], "9099": [2605, 619, 899, 2108, 2323, 2527, 3164, 920, 224, 3097, 2510, 635, 569, 276], "970": [2347, 1079, 2978, 653, 2668, 1085, 920, 224, 3097, 2333, 2959, 2015, 928, 853, 1147, 2813, 2153, 1481, 1876, 1656, 1606, 2960, 929, 569, 3149, 112, 1113, 1431, 2409, 69, 1525, 2732, 1856, 855, 2168, 704, 1839, 2983, 1854, 440, 3099, 2384, 3088, 3019, 2819], "2600": [2605, 1079, 2346, 2323, 2070, 2063, 920, 224, 3097, 706, 1656, 588, 257, 1796, 276, 1213, 2130], "3764": [438, 911, 586, 148, 861, 960, 861, 920, 224, 3097, 2510, 69, 569, 1876], "2160": [2858, 619, 630, 861, 213, 757, 920, 224, 3097, 400, 1074, 1013, 928, 233, 2760, 2265, 257, 2912, 929, 569, 2764, 2362, 1113, 69, 1525, 946, 139, 3161, 276, 1627, 395, 430, 768, 3143], "8894": [194, 216, 2482, 507, 1588, 861, 142, 3164, 1257, 920, 1907, 1612, 2160, 2549, 2524, 2936, 83, 855, 2384, 704, 2501, 1431], "5282": [1726, 221, 964, 1537, 653, 2668, 2282, 920, 224, 3097, 1997, 1195, 2960, 2912, 2015, 1691, 1606, 2936, 635, 2384, 2362, 1839, 2424, 2737, 3019, 1525], "1054": [3068, 2446, 2223, 861, 2845, 3023, 920, 224, 3097, 706, 588, 1195, 257, 1213, 569, 859, 2362, 1570, 318, 2645, 3044, 1796, 276, 1548, 821, 2677, 2184], "9102": [1521, 1079, 1465, 861, 1974, 861, 920, 224, 3097, 2510, 1391, 2936, 569, 2384, 2362, 2661, 440], "7498": [3048, 684, 3155, 861, 231, 2928, 920, 1144, 1761, 760, 1764, 2936, 569, 2384, 1245, 768], "2539": [839, 509, 593, 846, 1687, 48, 920, 224, 3097, 706, 2549, 2524, 1108, 2737, 83, 3054, 2168, 803, 276, 436, 821, 2424, 2153, 2645, 502, 2501], "3921": [1051, 166, 2984, 846, 3103, 2003, 920, 1907, 1612, 2327, 1013, 139, 569, 2764, 2362, 276, 2645, 802, 2409, 1147, 1525, 2734], "3601": [1234, 3152, 2223, 861, 150, 1649, 920, 224, 810, 2234, 1108, 3054, 1362, 569, 803, 2362, 1147, 390, 440, 276, 436, 2424, 2737, 502, 69, 1876], "8766": [1550, 3152, 794, 861, 489, 3084, 920, 224, 3097, 706, 1656, 608], "3281": [1051, 294, 2801, 2928, 497, 2063, 920, 224, 3097, 1997, 1968, 2936, 3061, 1362, 2384, 2424, 2737, 390], "1535": [2858, 1713, 2307, 1979, 861, 2484, 2323, 920, 1144, 1761, 760, 1108, 3054, 569, 803, 2068, 2645, 2424, 436, 2737, 502, 1147, 440], "8050": [2858, 294, 628, 861, 107, 1174, 920, 224, 3097, 2642, 2549, 2524, 2406, 83, 2362, 2501, 3044, 2442, 1028], "682": [1951, 1143, 964, 2323, 2323, 920, 224, 3097, 400, 1656, 1108, 1764, 3054, 569, 803, 436, 1245, 2424, 2737, 502], "2226": [1133, 294, 861, 152, 846, 920, 224, 810, 1102, 2549, 2524, 139, 83, 3054, 569, 2902, 2362, 276, 802, 2501, 436, 768], "2930": [308, 3152, 79, 861, 213, 3045, 2814, 119, 451, 124, 1607, 2549, 2524, 588, 257, 928, 3054, 569, 83, 2384, 2902, 1796, 2501, 802, 436, 1530, 1213, 1028, 1147], "8887": [839, 2864, 1603, 2094, 1047, 644, 3084, 920, 1144, 1761, 760, 928, 855, 704, 2645, 768, 1431], "8082": [438, 378, 1492, 1775, 861, 2484, 861, 920, 1144, 1761, 760, 3136, 569, 440], "149": [454, 1943, 580, 861, 213, 3023, 920, 224, 810, 2201, 739, 1195, 2936, 569, 855, 2384, 704, 1431, 2424, 2737, 1295, 946], "2143": [1234, 3152, 472, 861, 1594, 3045, 2814, 119, 1644, 2208, 2912, 2362, 768, 1548, 1525, 2734, 2661], "5069": [1640, 1191, 2373, 861, 1974, 757, 920, 224, 3097, 2510, 588, 2549, 257, 2936, 569, 1573, 2362, 1796, 440, 802, 2914, 2501, 1548, 1213, 577, 2661], "8195": [1948, 421, 2223, 653, 1304, 2003, 920, 224, 810, 18, 588, 257, 929, 855, 704, 1796, 276, 2645, 1431, 1213, 69, 1525], "4732": [1199, 1535, 964, 2887, 2928, 497, 2282, 920, 224, 3097, 706, 1656, 1108, 2502, 139, 3054, 1362, 569, 803, 390, 276, 2645, 436, 502, 69, 486, 1505, 1876], "5546": [438, 2446, 1798, 861, 152, 846, 920, 224, 3097, 1025, 2936, 2168, 2384, 2153, 1147, 440], "7755": [2554, 1222, 2223, 653, 1304, 1777, 2814, 119, 451, 957, 2549, 2524, 588, 257, 2479, 83, 704, 1762, 2501, 1796, 2424, 2737, 1213], "9183": [1550, 509, 964, 2674, 653, 2243, 2063, 920, 224, 810, 2204, 821, 768, 276, 2384, 2645], "6018": [1051, 2005, 967, 846, 1389, 1649, 920, 224, 810, 3142, 635, 1147], "5316": [670, 2060, 2082, 861, 152, 1649, 920, 224, 3097, 706, 2549, 2524, 2960, 2502, 83, 3014, 2501, 2424, 2737, 3019, 486, 751], "8439": [1554, 911, 51, 263, 1354, 653, 2853, 637, 861, 2938, 920, 1907, 1612, 2327, 1108, 2015, 3054, 803, 2362, 1839, 436, 2645, 502], "5159": [2605, 2446, 3107, 653, 2892, 846, 920, 224, 810, 1919, 1108, 2737, 3054, 569, 2168, 803, 1362, 318, 436, 2424, 2153, 502, 763, 2184, 390], "4542": [1550, 2770, 964, 2928, 1659, 1085, 920, 224, 810, 2204, 2990, 1108, 1013, 2406, 1362, 1231, 2153, 2737, 3054, 2764, 2424, 1113, 83, 2168, 803, 502, 2549, 2524, 2501, 436, 821, 390], "8956": [1449, 684, 2281, 861, 213, 1085, 920, 224, 3097, 400, 2534, 1391, 1764, 2912, 533, 569, 3054, 2168, 859, 2362, 2384, 2902, 1570, 2645, 1245, 436, 2153, 1147, 1525, 763, 440], "2406": [1521, 2142, 1851, 2928, 2518, 1085, 920, 224, 810, 2408, 2549, 2524, 635, 83, 1362, 2501, 2424, 2737, 2661, 390], "4988": [438, 2918, 143, 1032, 861, 2124, 3084, 920, 224, 3097, 2510, 2549, 2524, 588, 2502, 83, 3014, 1796, 2645, 2424, 276, 2737, 2501, 1213, 486, 1505], "3904": [2858, 3152, 838, 653, 1093, 757, 920, 224, 810, 394, 2737, 2936, 635, 139, 2168, 1362, 2384, 2424, 2153, 1548, 390], "6716": [1948, 3152, 1081, 653, 2668, 846, 920, 224, 3097, 1025, 2549, 2524, 2912, 83, 3054, 2902, 2501, 2645, 2424, 436, 2737, 1147, 1525], "5580": [2069, 2060, 964, 1985, 861, 468, 846, 920, 224, 3097, 706, 1656, 1108, 139, 3054, 803, 436, 2424, 2737, 2409, 502, 2661], "6898": [308, 937, 2928, 2899, 3164, 920, 1907, 2185, 1043, 929, 2912, 139, 569, 2409, 1548, 1525], "7664": [2248, 476, 2801, 2515, 861, 621, 3164, 920, 224, 810, 1102], "3961": [515, 3152, 2520, 1047, 456, 846, 920, 224, 3097, 706, 635, 1362, 2645, 821, 2424, 2737, 390], "6660": [3068, 1222, 955, 861, 1955, 2063, 920, 224, 810, 2204, 1195, 2479, 1362, 2362, 390, 1762, 276, 2645, 2424, 3044, 2737, 2409, 2661], "4560": [1234, 3152, 1902, 861, 1955, 2063, 920, 224, 810, 553, 569, 276, 2424, 2737, 3057, 751], "907": [1554, 166, 1081, 1795, 653, 2668, 1085, 920, 224, 3097, 706, 1387, 2015, 139, 2384, 2724, 1839], "8049": [1449, 2918, 29, 653, 784, 2928, 920, 224, 3097, 706, 1607, 2549, 2524, 588, 257, 2153, 928, 569, 83, 2168, 1796, 2501, 2645, 1530, 1213, 763], "63": [3040, 1191, 2355, 3084, 1649, 920, 224, 810, 3142, 2990, 1764, 2359, 569, 1231, 318, 1245, 3044, 768, 2475, 1113, 2184, 3057], "8012": [670, 2770, 2223, 249, 653, 1304, 3023, 920, 224, 2867, 417, 2549, 2524, 588, 1387, 83, 2724, 1796, 2501, 276, 2424, 2737, 1213], "8263": [2598, 2060, 2121, 403, 653, 784, 846, 920, 1907, 1612, 2327, 1968, 1764, 2479, 3061, 569, 1762, 1245, 2424, 2737, 751], "2531": [2605, 2464, 586, 861, 231, 2063, 920, 1907, 1612, 2327, 1656, 1012, 2936, 569, 2384, 802, 2409, 1147, 666, 2661], "8531": [1051, 2142, 955, 846, 2176, 3023, 920, 224, 3097, 706, 588, 257, 2479, 635, 1342, 1762, 1796, 276, 2645, 768, 2638, 1213], "8257": [1726, 294, 472, 653, 1416, 691, 2814, 119, 1644, 2208, 2709, 2936, 1013, 2384, 2764, 276, 1548, 577, 1147, 2661], "4089": [1521, 307, 964, 653, 2668, 2063, 920, 224, 3097, 706, 2350, 1847, 2015, 1645, 3061, 859, 853, 383, 3051, 1570, 2723, 2737, 2153, 1028, 1505, 1876, 1656, 257, 2912, 3054, 2456, 1912, 569, 2362, 318, 99, 1245, 1431, 3044, 2424, 598, 1213, 69, 946, 2184, 1745, 1525, 2732, 1195, 2710, 2734, 1342, 139, 855, 2629, 2061, 2168, 704, 1796, 1839, 2194, 2001, 1854, 763, 268, 588, 966, 1764, 2936, 635, 675, 2574, 2384, 2902, 601, 2638, 3092, 436, 768, 3108, 1295, 3057], "2932": [1521, 421, 2281, 861, 2611, 2003, 2814, 119, 451, 1134, 1108, 2645, 2737, 2153, 257, 3054, 569, 2362, 2424, 1195, 1387, 83, 2168, 803, 1796, 276, 502, 2549, 2524, 588, 635, 2384, 2724, 2501, 436, 1213, 3019, 3057], "4636": [2665, 433, 289, 653, 1569, 846, 920, 224, 3097, 2510, 1195, 569, 2362, 768, 2424, 2737, 3044, 946], "9451": [2846, 307, 653, 2243, 846, 920, 224, 3097, 400, 2660, 2153, 751, 139, 569, 2168, 276, 802, 2424, 2737, 598, 3057, 763, 1505], "5940": [2605, 1222, 861, 152, 846, 920, 224, 3097, 1997, 1195, 1895, 1691, 2362, 286, 3044, 1525], "9367": [1051, 1943, 2006, 1780, 861, 1974, 2928, 920, 224, 3097, 329, 2168, 2362, 2153], "8000": [308, 2984, 861, 2484, 653, 920, 224, 810, 464, 1013, 569, 2764, 608], "4360": [2554, 1565, 964, 2048, 861, 213, 1085, 920, 224, 3097, 400, 1108, 2912, 635, 3054, 803, 276, 436, 2424, 2737, 502, 1525, 1505], "7047": [839, 911, 541, 861, 107, 3045, 2814, 119, 451, 124, 1656, 1075, 2737, 1342, 139, 569, 1362, 2168, 2061, 2362, 2638, 276, 802, 2424, 768, 2153, 1028, 1147, 763, 390], "5302": [2248, 2918, 964, 2928, 473, 2282, 920, 224, 3097, 1889, 1656, 276], "6656": [2605, 3152, 2548, 2323, 2610, 573, 920, 1144, 1761, 760, 2661, 1479], "6809": [2858, 1191, 653, 2103, 2928, 920, 224, 810, 3142, 1656, 257, 1387, 635, 802, 1147], "5760": [1199, 433, 1635, 861, 2484, 3164, 920, 224, 3097, 400, 2936, 569, 2384, 2168, 859, 1570], "8075": [670, 221, 1520, 653, 2668, 2323, 920, 224, 810, 2697, 2912, 2960, 139, 2362, 768, 3019, 2970, 440], "8598": [438, 1191, 2223, 653, 2243, 2282, 920, 224, 810, 2201, 1195, 1391, 966, 2936, 395, 569, 2384, 2362, 3161, 276, 768, 1147, 440], "3831": [1133, 2864, 2346, 2928, 473, 1085, 920, 224, 3097, 1889, 1074, 257, 929, 855, 430, 2362, 2760, 704, 3044, 1431, 768, 3057, 69, 2130, 440], "5824": [515, 165, 1081, 2323, 1963, 846, 920, 224, 3097, 706, 276, 2645], "2000": [1726, 166, 1540, 861, 152, 2282, 920, 224, 810, 12, 1074, 1391, 928, 2760, 1530, 1028, 2661, 1656, 257, 569, 2362, 1245, 1525, 1607, 704, 440, 1764, 2936, 2384, 430, 1147, 2734], "5057": [1234, 3152, 496, 653, 2668, 48, 920, 224, 3097, 400, 2936, 635, 569, 2384, 2409, 2661], "801": [1121, 911, 2801, 653, 2243, 2063, 920, 224, 810, 464, 2549, 2524, 83, 2501, 2645, 2424, 276, 2737, 1505], "3622": [454, 1079, 526, 2928, 1659, 3164, 920, 224, 3097, 400, 2549, 2524, 1075, 2502, 929, 1387, 83, 2061, 2724, 704, 276, 2501, 69, 486], "6632": [89, 509, 2482, 507, 1588, 861, 960, 852, 356, 920, 1907, 1612, 2160, 608], "834": [2598, 166, 5, 847, 2190, 507, 958, 820, 2928, 1605, 1840, 653, 2428, 579, 1390, 920, 1144, 1761, 760, 2549, 2524, 83, 2501, 2645, 2424, 3044, 2737], "3564": [2352, 294, 516, 2323, 2382, 2323, 920, 1907, 2185, 1043, 1195, 2362, 2424, 2737, 1147, 3057], "5193": [1449, 166, 1356, 349, 653, 920, 1907, 2185, 1043, 1656, 3054, 569, 797, 859, 2384, 2902, 704, 608, 276, 436, 768, 1481], "9322": [194, 1417, 2223, 653, 1499, 757, 920, 224, 810, 918, 139, 276, 802, 2424, 2737], "870": [1948, 421, 964, 653, 2668, 2063, 920, 224, 3097, 706, 2936, 3054, 2384, 2902, 276, 436, 2645, 751], "2663": [1199, 294, 964, 2928, 1724, 1649, 920, 224, 3097, 706, 588, 1764, 257, 2936, 635, 569, 2384, 1796, 276, 1245, 1548, 1213, 2677], "8520": [1449, 421, 1636, 653, 2668, 2323, 920, 224, 810, 3142, 2168, 2384, 257, 2130, 2362], "3457": [1234, 3152, 712, 3167, 653, 1304, 2063, 920, 224, 810, 1369, 1075, 569, 2061, 1479, 276, 821, 751], "7402": [670, 433, 995, 861, 152, 48, 920, 224, 3097, 400, 2549, 2524, 83, 2362, 2501, 802], "1309": [3048, 2465, 964, 249, 846, 1122, 757, 920, 224, 3097, 1889, 853, 2664, 2238, 1481, 1656, 257, 929, 2912, 3032, 1559, 569, 2420, 2362, 1245, 69, 1525, 704, 1844, 440, 1764, 1295, 1147, 3057], "3405": [515, 165, 1952, 653, 784, 3164, 920, 1907, 1612, 2327, 2936, 635, 2384, 276, 2424, 2737], "3410": [3048, 911, 1523, 861, 152, 757, 920, 224, 2867, 819, 1801, 1669, 569, 257], "5462": [1550, 378, 2323, 1963, 1649, 920, 1907, 2185, 358, 139, 569, 859, 828, 608, 1570, 3044, 2599], "8475": [89, 2864, 5, 847, 2190, 507, 958, 820, 846, 2639, 1528, 2466, 846, 200, 2290, 343, 920, 1144, 1761, 760, 569, 2384, 3044, 2335, 2936], "2269": [1951, 165, 787, 2571, 653, 2243, 2323, 920, 224, 3097, 706, 2661, 1108, 1391, 635, 3054, 803, 276, 802, 2424, 436, 2737, 2409, 502, 768, 1147, 440], "7090": [1051, 216, 2223, 653, 1499, 1085, 920, 224, 3097, 1889, 1606, 2960, 2015, 1013, 928, 2936, 2384, 2764, 276, 1839, 3019], "3688": [1640, 619, 593, 653, 2668, 846, 920, 224, 3097, 400, 569], "7128": [3048, 1222, 2561, 450, 861, 2484, 2063, 920, 224, 3097, 1291, 2549, 2524, 2661, 1391, 2502, 83, 2501, 2645, 2409, 1147, 486, 440], "2925": [2665, 433, 2281, 192, 653, 2243, 1085, 920, 224, 3097, 706, 2549, 1968, 2524, 257, 2936, 3061, 635, 83, 569, 139, 2168, 2384, 3051, 2501, 802, 3044, 2409, 1147, 1525, 440], "3797": [1051, 619, 2223, 557, 2323, 2289, 2282, 920, 224, 810, 1369, 1108, 2912, 1895, 1013, 635, 569, 3054, 2764, 803, 2656, 608, 2645, 2424, 821, 2737, 436, 502, 3088, 1525, 2178], "2526": [1133, 1417, 1707, 2323, 2298, 2063, 920, 224, 3097, 2510, 1607, 1993, 1764, 1587, 635, 2384, 859, 853, 733, 1570, 1245, 802, 1295], "5380": [2248, 166, 1540, 2157, 846, 1687, 3164, 920, 224, 810, 464, 1656, 2912, 2962, 2384, 2362, 1608, 1147, 1525, 440], "4973": [1234, 3152, 3073, 653, 145, 48, 920, 224, 810, 1161, 1656, 2534, 2912, 569, 2168, 2384, 440, 318, 3044, 2153, 1525, 2184, 2854], "1437": [1234, 3152, 964, 846, 1687, 2063, 920, 224, 3097, 706, 2549, 2524, 1656, 1968, 82, 2936, 3061, 83, 2501, 2424, 2737, 2661], "672": [1948, 421, 2346, 2928, 1659, 3164, 920, 224, 3097, 706, 2691, 276, 2424, 2737, 2677, 1753, 751], "2434": [1521, 1079, 653, 856, 1649, 920, 224, 3097, 2510, 1656, 2912, 2015, 1645, 569, 1856, 859, 608, 1147, 1570, 1839, 2645, 2684, 69, 1525, 1876], "8744": [1449, 216, 58, 2848, 861, 152, 2282, 920, 224, 810, 2201, 1656, 928, 569, 608], "7398": [1951, 421, 2223, 861, 2611, 1777, 2814, 119, 1644, 1370, 635, 1548, 768], "913": [308, 3152, 1460, 2928, 1884, 861, 920, 224, 3097, 400, 1656, 2549, 2524, 257, 83, 569, 139, 1912, 2501, 2645, 1525, 2130], "5035": [1948, 421, 1936, 861, 213, 1085, 920, 224, 810, 3142, 569], "3235": [438, 2060, 1254, 2323, 2070, 3023, 2814, 119, 1644, 2414, 2732, 1108, 1764, 2015, 3054, 569, 803, 1839, 1245, 276, 436, 502, 946, 1525], "8468": [1550, 911, 1920, 861, 107, 266, 2814, 119, 1644, 2208, 1656, 588, 257, 1796, 276, 2645, 2424, 2737, 1213], "1": [2598, 378, 471, 653, 54, 2282, 920, 224, 810, 464, 1108, 257, 2912, 635, 3054, 803, 821, 2645, 436, 502, 1525], "4410": [1449, 476, 1936, 653, 1304, 757, 920, 224, 810, 2719, 2936, 2384, 3051, 276, 3044, 751], "2694": [2858, 433, 1332, 2323, 676, 3084, 920, 224, 3097, 400, 2549, 2524, 83, 569, 2501, 2424, 2737, 1548, 751], "2676": [3040, 619, 2801, 2171, 2928, 473, 1649, 920, 224, 810, 2204, 2549, 2524, 1387, 83, 2724, 2501, 2645, 2424, 802, 2737], "2876": [2665, 2770, 1540, 2873, 653, 2243, 2003, 2814, 119, 451, 1119, 1656, 1606, 569, 1362, 855, 608, 704, 276, 2424, 1431, 2737, 390], "2241": [515, 3152, 1636, 653, 2243, 3164, 920, 224, 3097, 400, 2420, 2362, 276, 768, 1548, 1525], "4773": [2858, 433, 1254, 653, 1304, 653, 920, 224, 810, 553, 569, 2456, 1525], "6608": [2598, 2465, 979, 653, 2668, 1649, 920, 224, 3097, 706, 2409, 2813, 276, 2983], "6539": [2605, 2918, 1920, 846, 2176, 510, 2814, 119, 1644, 2208, 2990, 1895, 1231, 859, 1570, 2153, 2737, 1481, 1505, 1876, 1656, 1606, 569, 2420, 2362, 318, 1245, 1113, 3044, 2424, 69, 946, 2184, 1525, 2709, 1387, 139, 2168, 2061, 440, 1764, 2724, 3108], "4771": [2846, 421, 1186, 861, 538, 757, 920, 1907, 2185, 1043, 2737, 2479, 1387, 2936, 139, 2168, 635, 2384, 2724, 2362, 1147, 1762, 276, 2424, 2153, 1028, 946, 1525], "8741": [89, 216, 861, 2484, 1047, 920, 224, 3097, 706, 569, 2384, 3044, 2936], "5838": [1449, 216, 964, 2186, 861, 757, 920, 224, 3097, 1889, 635, 276, 2424, 2737, 2677, 1147, 440], "5651": [1521, 1191, 1540, 653, 2243, 757, 920, 224, 3097, 1997, 1607, 2350, 1195, 751, 928, 569, 2362, 3092, 768, 1530, 2409, 3057, 69, 1745, 1876], "3869": [1948, 421, 1828, 2928, 1659, 1649, 920, 224, 3097, 706, 1548], "9009": [2605, 911, 2256, 13, 1354, 861, 960, 1339, 2323, 898, 920, 1144, 1761, 760, 569, 2384, 3044, 2362], "2052": [670, 2446, 127, 2928, 2600, 846, 920, 224, 3097, 400, 2534, 1108, 1895, 139, 3054, 569, 2384, 859, 2656, 803, 1570, 436, 502, 2178], "153": [670, 476, 2223, 2848, 2928, 131, 861, 920, 224, 810, 464, 1013, 569, 2764, 608, 318, 2645, 2184], "5998": [515, 165, 630, 1894, 653, 2243, 1649, 920, 224, 3097, 400, 1108, 1895, 1013, 859, 1570, 2645, 2737, 2153, 1876, 569, 3054, 2764, 2362, 2656, 1245, 2424, 1431, 69, 1195, 2660, 527, 2168, 855, 803, 704, 502, 763, 2178, 1764, 436, 1147, 3057], "5201": [1951, 3152, 5, 847, 2190, 507, 958, 820, 653, 181, 1138, 375, 653, 2428, 579, 1390, 920, 1144, 1761, 760, 1656, 139, 635, 608, 2362], "7231": [1449, 911, 640, 653, 2243, 846, 920, 224, 3097, 706], "7152": [2858, 221, 498, 3144, 861, 960, 846, 920, 1907, 1612, 795, 257, 929, 1013, 2015, 569, 2362, 2068, 1839, 1831, 69, 440], "702": [1948, 421, 1053, 861, 2484, 2282, 920, 224, 3097, 400, 569, 2384, 2645], "3045": [2554, 1417, 1238, 2994, 861, 152, 1649, 920, 224, 3097, 1291, 588, 2549, 2524, 83, 569, 1362, 276, 2645, 2424, 2501, 2737, 2734, 390], "5447": [2352, 1191, 2346, 653, 2668, 2003, 920, 224, 3097, 2642, 1656, 2960, 3019, 2362, 2424, 2737, 1028, 1147], "5240": [1726, 2770, 1523, 861, 152, 2063, 920, 224, 810, 602, 1607, 2479, 1013, 928, 569, 139, 2764, 954, 2362, 1762, 318, 2645, 3044, 276, 1530, 2409, 2677, 1509, 2184, 2661], "4699": [2248, 433, 1636, 1298, 2928, 1659, 3164, 920, 224, 3097, 706, 1108, 3054, 569, 803, 318, 436, 2424, 276, 2737, 1548, 502, 2184], "6271": [454, 1417, 2984, 861, 68, 2063, 920, 224, 3097, 706, 635, 569, 1525, 2912, 2362], "9292": [1121, 2060, 1238, 1487, 653, 210, 861, 920, 224, 3097, 2510, 2734, 1895, 3054, 2384, 436, 2178], "5227": [3040, 294, 2801, 3167, 1047, 1527, 3023, 920, 224, 810, 1428, 1764, 2912, 2479, 855, 569, 1762, 704, 276, 1245, 1431, 1525, 2734], "7967": [1640, 1191, 861, 1974, 1047, 920, 224, 810, 1161, 3019, 1525, 768, 2960, 2362], "2906": [2605, 509, 1081, 861, 1320, 2063, 920, 224, 3097, 706, 1656, 2660, 1362, 2947, 2424, 3044, 2737, 2677, 390], "3338": [1051, 2060, 2758, 861, 1950, 861, 920, 224, 3097, 2510, 1391, 2502, 2936, 569, 2384, 1147, 486, 440], "5737": [1199, 2770, 3102, 861, 2484, 2323, 920, 224, 3097, 329, 1607, 1013, 928, 569, 2764, 2645, 2914, 1530, 1147, 440], "8350": [1550, 1670, 964, 861, 2611, 2063, 920, 224, 3097, 706, 1108, 2912, 3054, 803, 276, 802, 2645, 2424, 2737, 436, 502, 1525], "6945": [308, 3152, 206, 3084, 2454, 2063, 920, 224, 3097, 400, 635, 569, 276, 2645, 1147, 440], "3240": [3048, 166, 1129, 385, 846, 759, 2063, 920, 224, 3097, 329, 1147, 2384, 2936], "3626": [1554, 221, 591, 403, 2928, 1679, 2829, 861, 960, 920, 1907, 1612, 2327, 1607, 1993, 2524, 928, 569, 139, 1530], "5831": [2846, 619, 2346, 1047, 2282, 920, 224, 810, 918, 2534, 1108, 1764, 2912, 139, 3054, 569, 3149, 803, 2902, 2384, 1245, 436, 821, 502, 3088, 1147, 1525, 763, 440], "4730": [194, 2446, 51, 1451, 989, 846, 3003, 2112, 2928, 879, 920, 1144, 1192, 167, 1074, 430, 2823, 2760, 276, 3044, 751], "5636": [2598, 1079, 964, 1769, 861, 213, 3023, 920, 224, 3097, 2642, 1607, 1342, 533, 1387, 928, 569, 2724, 2638, 802, 3044, 1530, 1548], "3396": [194, 1535, 2984, 3084, 1166, 846, 920, 224, 810, 3142, 1656, 2350, 1764, 2912, 1525, 2502, 635, 569, 855, 704, 3092, 1245, 1431, 2424, 2737, 768, 1295, 486, 1987, 1745], "1397": [2605, 433, 1053, 861, 213, 846, 920, 224, 810, 553, 2283, 2661], "6940": [515, 1222, 964, 861, 2484, 1649, 920, 224, 3097, 400, 1607, 928, 569, 2384, 2362, 276, 1530], "5288": [308, 3152, 1798, 653, 2243, 48, 920, 224, 3097, 706, 1108, 928, 3054, 803, 828, 859, 1570, 436, 502], "1692": [308, 3152, 864, 653, 2033, 1649, 920, 1907, 2185, 1043], "8058": [2248, 2446, 1602, 2323, 2766, 861, 920, 224, 810, 2204, 635, 704, 928, 2645], "3550": [1234, 3152, 2801, 653, 1304, 861, 920, 224, 3097, 706, 2479, 635, 2168, 1762, 2153, 2677], "1873": [1449, 1222, 1350, 1297, 861, 1974, 846, 920, 1144, 1761, 760, 1108, 635, 3054, 569, 803, 436, 2424, 2737, 502, 2677, 1147, 440], "8504": [2347, 1079, 2903, 1412, 653, 1499, 1649, 920, 224, 810, 2204, 1607, 1764, 2153, 928, 569, 2384, 2168, 1245, 1530, 2677, 1509], "2048": [1948, 1565, 2223, 861, 213, 1085, 920, 224, 810, 1369, 2612, 1387, 1013, 2764, 2724, 276, 2645, 802, 2677], "4149": [1554, 2464, 29, 2509, 2928, 80, 653, 920, 224, 3097, 400, 1195, 1764, 1505, 569, 1245, 946, 3057], "8170": [1051, 2464, 949, 861, 2297, 3023, 920, 224, 3097, 2767, 2549, 2524, 2936, 83, 2384, 2362, 2501, 821, 1028, 1147, 2734], "5202": [2665, 378, 2928, 2485, 2063, 920, 224, 3097, 1291, 257, 569, 276, 821, 2130, 440], "3267": [1521, 1535, 861, 1974, 48, 920, 224, 3097, 1025, 2549, 2524, 139, 2501, 83], "2870": [2665, 1713, 160, 2928, 1659, 861, 920, 224, 3097, 400, 588, 257, 635, 1796, 2424, 2737, 1213], "8436": [1640, 1535, 1902, 912, 2323, 2070, 48, 920, 224, 810, 2201, 1195, 1108, 3054, 2478, 803, 2265, 436, 2424, 3143, 2737, 1113, 502, 2285], "2896": [1951, 1565, 2903, 861, 1594, 846, 920, 224, 3097, 706, 704, 569, 2384, 768, 751], "7793": [2605, 1143, 1902, 2849, 846, 1881, 3045, 920, 224, 3097, 1001, 2549, 2524, 929, 83, 2362, 704, 276, 2501, 2424, 768, 2737, 69, 440], "441": [1550, 307, 2984, 2315, 1047, 36, 861, 920, 224, 810, 2204, 1656, 588, 1764, 257, 1387, 635, 569, 608, 1796, 1245, 2645, 1431, 2737, 2424, 1213, 751], "5868": [2069, 294, 1381, 927, 507, 2928, 1605, 1405, 861, 2400, 920, 1144, 1761, 760, 2534, 86, 2734, 1505, 2617, 569, 1362, 608, 318, 2645, 1113, 276, 2265, 821, 598, 3143, 1525, 2184, 2285, 390], "6346": [308, 1513, 846, 2282, 920, 224, 810, 3142, 2456], "6013": [2069, 378, 1636, 861, 152, 1085, 920, 224, 3097, 706, 1656, 588, 2534, 1108, 1213, 3054, 569, 2384, 803, 2241, 1796, 276, 1062, 436, 502, 2677, 2088, 1505], "3763": [3040, 2770, 1901, 653, 1304, 1047, 920, 224, 810, 394, 1570, 1147, 859], "3037": [2069, 509, 1603, 2141, 653, 210, 48, 920, 224, 3097, 329, 2732, 2015, 502, 569, 3054, 2902, 803, 2362, 2062, 608, 3104, 276, 2645, 2424, 1839, 2737, 436, 2676, 763, 2661], "6395": [1550, 911, 2281, 846, 1649, 920, 224, 810, 2204, 1968, 3061, 2153, 2168, 1362, 821, 768, 2424, 2737, 390], "9470": [2605, 1943, 2702, 2323, 2756, 3164, 920, 224, 3097, 1812, 2549, 2524, 1387, 635, 139, 83, 2724, 704, 276, 802, 2501, 2409, 751, 2661], "5081": [2352, 619, 2256, 632, 989, 861, 1114, 2316, 2928, 1376, 920, 1144, 1761, 760, 2549, 2524, 1895, 83, 569, 3054, 2362, 2656, 2501, 436, 821, 1295, 2178], "1213": [670, 476, 2984, 861, 1621, 3164, 920, 224, 810, 3142, 569, 2645, 2168, 2153], "5263": [2347, 378, 1381, 927, 2024, 653, 181, 2707, 1047, 920, 1144, 1761, 760, 1656, 1028, 569, 2384, 2362], "6474": [1951, 421, 2197, 507, 2928, 2518, 653, 920, 224, 3097, 2510, 139, 569, 2384, 2362, 802, 2424, 2737, 1028, 751], "546": [2846, 2060, 1540, 653, 1304, 2003, 920, 224, 3097, 1889, 1607, 928, 569, 139, 1530, 318, 2424, 2737, 2184, 1505], "6322": [515, 1222, 580, 3029, 2928, 473, 757, 920, 224, 3097, 706, 2549, 2524, 635, 83, 139, 2501, 276, 1548], "8558": [1051, 433, 640, 861, 2484, 846, 920, 224, 3097, 706, 257, 635, 139, 569, 2168, 1912, 2362, 1164, 916, 1548, 3019, 1525, 2130], "7905": [308, 653, 1932, 861, 920, 224, 810, 2204, 588, 1391, 257, 1013, 569, 2764, 1796, 1213, 1147, 1505, 440], "1216": [1951, 2770, 490, 3162, 2928, 1659, 1649, 920, 224, 810, 553, 1656, 1195, 2534, 257, 569, 2384, 822, 2362, 1147, 2914, 3044, 2661, 2728, 946, 2130, 440], "1613": [1234, 3152, 949, 2251, 653, 1304, 1649, 920, 224, 810, 2204, 2549, 2524, 884, 2936, 83, 569, 2384, 2501, 276, 2424, 3044, 2737, 2613, 751], "203": [1554, 1417, 979, 653, 1304, 1085, 920, 224, 3097, 706, 326, 1013, 2764, 2645, 2424, 2737, 2676, 69, 1876], "675": [2858, 216, 1937, 1177, 861, 152, 846, 920, 224, 3097, 400, 2936, 569, 2384, 859, 828, 608, 1570], "1093": [2598, 1943, 2481, 1629, 653, 2003, 920, 1907, 1612, 2327, 1108, 2479, 2737, 1656, 257, 1606, 2912, 929, 3054, 2424, 69, 1525, 2732, 1195, 2612, 139, 803, 704, 1796, 276, 502, 440, 588, 635, 1762, 436, 768, 1213, 1147, 3057], "906": [1554, 1191, 2984, 1994, 2928, 2030, 1649, 920, 224, 3097, 706, 588, 257, 2936, 3054, 569, 2384, 2902, 608, 1796, 276, 436, 1213, 1147, 440], "554": [1726, 294, 2927, 653, 2243, 1085, 920, 224, 810, 553, 569, 2645, 768, 2362], "2913": [2347, 166, 29, 2866, 653, 2243, 2063, 920, 224, 3097, 400, 2549, 2524, 2479, 83, 1762, 2501, 2645, 2424, 2737, 2734], "4841": [2347, 166, 2066, 1827, 861, 1866, 3164, 920, 1907, 1612, 2327, 2549, 2524, 2912, 1387, 83, 276, 2645, 2501, 1525], "863": [89, 1618, 2300, 548, 653, 524, 861, 920, 224, 3097, 329, 1108, 139, 3054, 1362, 569, 803, 318, 2645, 1113, 436, 502, 2184, 390], "8264": [2846, 421, 3047, 1279, 2928, 1679, 935, 861, 1033, 920, 1907, 1612, 316, 718, 2936, 635, 2384, 3104, 1668], "8647": [839, 166, 357, 2373, 861, 231, 2063, 920, 1907, 1612, 2327, 2549, 2524, 635, 83, 569, 2501, 2424, 2737, 2409, 2661], "7580": [2069, 1618, 2256, 632, 1354, 2928, 1605, 1962, 861, 2235, 920, 1144, 1761, 760, 1656, 1195, 569, 2362, 3051, 3044, 1548, 763], "8465": [839, 509, 1301, 2928, 1616, 1085, 920, 224, 810, 2964, 2549, 2524, 635, 83, 569, 2501, 2424, 2737], "8572": [1951, 3152, 29, 653, 1304, 653, 920, 224, 3097, 706, 588, 1391, 257, 533, 635, 139, 2168, 1796, 318, 2153, 1213, 1147, 2184, 3057, 440], "760": [1948, 3152, 330, 653, 210, 2282, 920, 224, 810, 2964, 1108, 2936, 3054, 2384, 803, 2362, 436, 2424, 2737, 502, 1028, 1147, 1525], "1001": [1948, 421, 51, 453, 653, 779, 846, 3003, 920, 1907, 1612, 2327, 1656, 569, 2362, 821, 768, 598, 763], "4282": [1051, 1417, 593, 861, 213, 861, 920, 224, 810, 3142, 2912, 3054, 2168, 2902, 436, 3019, 1525], "5352": [454, 1222, 496, 2257, 2928, 1659, 2063, 920, 224, 810, 2204, 2549, 2524, 2936, 635, 83, 2384, 2501, 2424, 768, 2737, 69, 1876], "4432": [3068, 166, 1602, 2323, 2059, 48, 920, 224, 810, 553, 2990, 1108, 2479, 1013, 1231, 2737, 1481, 1876, 1656, 257, 2960, 929, 2912, 3054, 569, 2764, 2362, 802, 1113, 2424, 69, 946, 1525, 1945, 751, 2709, 1342, 139, 1598, 803, 1796, 276, 502, 588, 1762, 2638, 436, 768, 1213, 3019], "2390": [438, 216, 1828, 653, 2243, 2282, 920, 224, 3097, 706, 1993, 2912, 928, 2384, 276, 2424, 2737, 1525], "8227": [2846, 1696, 189, 1361, 2928, 1661, 48, 920, 224, 810, 1614, 588, 2524, 2549, 2912, 83, 2501, 2645, 3044, 2424, 2737, 1525, 751], "434": [308, 3152, 499, 775, 2928, 2738, 48, 920, 224, 3097, 1291, 2549, 2524, 2912, 635, 3105, 83, 2501, 821, 3044, 1525, 2734], "1522": [670, 2770, 1540, 1047, 3072, 1649, 920, 224, 810, 2204, 1895, 2479, 3051, 2737, 2677, 486, 2661, 1656, 257, 569, 2362, 1245, 2424, 3044, 802, 2409, 1195, 83, 1796, 2947, 588, 2549, 2524, 1764, 2502, 1762, 2501, 821, 2169, 1213], "5752": [3048, 216, 1978, 861, 1974, 2063, 920, 224, 3097, 329, 1028, 1147, 2645, 3057], "2420": [1449, 509, 593, 2323, 2070, 846, 920, 224, 810, 464, 2645, 2362, 53, 1387], "4762": [2858, 221, 964, 653, 2668, 3164, 920, 224, 3097, 1889, 2362, 276, 2424, 2737, 1028, 1147, 751], "1642": [1051, 509, 472, 846, 2176, 2330, 2814, 119, 1644, 2208, 1656, 2732, 588, 257, 635, 569, 2362, 1147, 1796, 2424, 2737, 2409, 1213, 1854, 440], "8171": [2554, 2005, 964, 2515, 653, 2243, 3023, 920, 224, 810, 1369, 1195, 2479, 2362, 1762, 802, 821, 440], "5994": [2858, 1535, 1050, 2024, 861, 231, 653, 920, 1907, 2185, 1043, 2645, 3044, 751], "5754": [308, 3152, 1540, 1177, 653, 2668, 48, 920, 224, 810, 394, 1607, 2549, 2524, 1108, 2962, 928, 569, 3054, 83, 803, 2362, 1530, 1608, 2645, 2424, 276, 2737, 2501, 502, 436], "5828": [1051, 2446, 794, 2323, 2658, 846, 920, 224, 810, 3142, 1656, 1968, 1764, 3061, 2153, 569, 2168, 2384, 318, 1245, 2424, 802, 2737, 2677, 2184], "393": [2665, 476, 2663, 861, 1320, 846, 920, 1907, 2185, 1043, 569], "5899": [1234, 3152, 1254, 861, 1621, 3164, 920, 224, 810, 2204, 569, 2168, 1087, 2645, 2153, 2677, 440], "8730": [2846, 2060, 1936, 653, 1304, 3023, 2814, 119, 1644, 2753, 139, 2645, 1525, 2912], "730": [2846, 1713, 1540, 861, 2611, 1085, 920, 224, 810, 464, 1195, 139, 3108, 2362, 1548, 1481], "7705": [1133, 2918, 1937, 1168, 653, 2668, 1649, 920, 224, 3097, 1997, 2549, 2524, 1108, 1764, 635, 83, 3054, 569, 2902, 803, 2362, 2501, 1245, 2645, 3044, 436, 768, 502, 1525], "6613": [89, 2864, 1053, 846, 673, 2323, 920, 224, 3097, 400, 569, 440], "1442": [1554, 2446, 2121, 1194, 2928, 2738, 3164, 920, 1907, 1612, 2327, 1764, 2936, 2168, 569, 2384, 1245, 2645, 2409, 2661], "3687": [1199, 619, 2066, 3144, 861, 231, 1085, 920, 1907, 1612, 2327, 1195, 635, 139, 2168, 2362, 1113, 3044, 1548], "2305": [2665, 166, 640, 1202, 861, 152, 653, 920, 224, 3097, 400, 139, 440, 2384, 1525, 2936], "9464": [2665, 1417, 593, 2928, 1724, 846, 920, 224, 3097, 400, 326, 1195, 569, 2645, 2676, 1525, 763], "856": [2248, 911, 2192, 861, 231, 2928, 920, 1907, 1612, 2327, 2886, 69, 929], "1107": [89, 2060, 2984, 48, 693, 3045, 2814, 119, 1644, 2753, 257, 2362], "4387": [1948, 421, 1053, 861, 213, 1649, 920, 224, 3097, 400, 2015, 1839, 2645], "1501": [1521, 1222, 2223, 861, 213, 757, 2814, 119, 451, 1119, 1656, 1606, 276, 2409, 1147, 440], "123": [3048, 509, 2334, 861, 489, 1085, 920, 224, 810, 2201, 569, 2384], "8934": [1726, 2864, 838, 861, 621, 846, 920, 224, 810, 464, 1570, 1147, 821, 859, 276], "5093": [2605, 226, 1301, 861, 420, 757, 920, 224, 3097, 1989, 569, 2645, 3044, 884], "8581": [1726, 2464, 2486, 512, 653, 210, 2282, 920, 224, 3097, 400, 2549, 2524, 83, 2501], "2507": [1234, 3152, 653, 932, 1649, 920, 224, 810, 3142, 1607, 928, 569, 2384, 1992, 1732, 276, 1530], "9266": [3040, 2005, 2223, 653, 2243, 846, 920, 224, 810, 1369, 1656, 2153, 139, 569, 2168, 608, 318, 2914, 3143, 2265, 2184], "7856": [2605, 476, 2928, 473, 757, 920, 224, 3097, 1889, 1074, 257, 430, 2760, 276, 1945], "6827": [454, 1535, 964, 653, 600, 2063, 920, 224, 810, 464, 1391, 1108, 635, 139, 3054, 569, 1912, 803, 2902, 3051, 802, 436, 768, 502, 3057, 1147, 1525, 751, 440], "7044": [515, 1222, 642, 1816, 349, 1325, 653, 2853, 920, 1907, 1612, 2327, 1607, 139, 928, 569, 2645, 802, 1530], "347": [1948, 3152, 964, 653, 54, 2928, 920, 224, 3097, 706, 2549, 2524, 1108, 83, 3054, 803, 2362, 2501, 2645, 436, 1548, 502, 1028, 1147], "2037": [1234, 3152, 964, 2462, 653, 2243, 48, 920, 224, 3097, 706, 1656, 635, 2424, 2737, 1147, 1505, 440], "6105": [1521, 1222, 1378, 653, 811, 2323, 920, 224, 3097, 400, 1387, 2168, 569, 608, 859, 1570, 440], "4021": [194, 3152, 1902, 2868, 653, 2056, 1085, 920, 224, 3097, 706, 2549, 2524, 2534, 2709, 929, 83, 569, 139, 2384, 440, 276, 2501, 69, 1481, 2734, 1876], "6535": [2846, 1670, 1920, 861, 2200, 266, 2814, 119, 1644, 2208, 2549, 2524, 1505, 83, 2501, 276, 802, 751], "1699": [2605, 2464, 787, 861, 152, 2063, 920, 224, 3097, 2767, 1108, 3054, 569, 803, 2362, 436, 502, 1028, 1147, 2734], "3284": [2598, 2465, 29, 861, 2124, 48, 920, 224, 3097, 706, 1968, 2912, 1013, 635, 3061, 2764, 2362, 1028, 1525, 1505], "6625": [1726, 1079, 499, 861, 2484, 653, 920, 224, 3097, 706, 1656, 928, 2645, 802, 1387], "5988": [1726, 2060, 964, 1438, 861, 1190, 861, 920, 224, 3097, 706, 2549, 2524, 83, 2501, 276, 2424, 2737], "4317": [2554, 294, 491, 861, 152, 3084, 920, 224, 810, 2697, 2962, 1608, 3044], "9217": [1640, 294, 1830, 653, 2243, 1085, 920, 224, 3097, 400, 2549, 2524, 1013, 83, 2764, 2362, 276, 2501, 2424, 2737, 1295, 1028, 598], "5269": [3048, 911, 29, 861, 2484, 757, 920, 224, 3097, 706, 1656, 2549, 2524, 1387, 83, 569, 139, 1912, 2724, 2501, 2645, 2424, 2737, 1525, 751], "7846": [2598, 1222, 29, 653, 210, 846, 920, 224, 3097, 400, 588, 257, 139, 1796, 802, 1213, 1147], "1612": [1726, 1713, 1567, 653, 359, 861, 920, 224, 3097, 329, 1656, 569, 608, 2424, 2737, 2677, 751], "7004": [515, 1222, 2080, 861, 425, 2063, 920, 224, 810, 2204, 1968, 1195, 3061, 276, 2424, 2737], "6019": [1121, 1618, 2801, 249, 861, 2845, 1777, 2814, 119, 451, 124, 588, 257, 2585, 855, 2168, 2384, 2362, 704, 1796, 1431, 2153, 1213, 1028, 1147], "4878": [454, 2446, 2481, 861, 1974, 3023, 920, 1907, 1612, 2327, 1895, 1013, 3054, 2764, 2656, 3051, 436, 3044, 3057, 2178], "8241": [2347, 433, 964, 2251, 2928, 473, 2063, 920, 224, 3097, 1889, 2990, 2912, 569, 1231, 2362, 112, 1762, 2645, 1113, 2677, 3099, 1525, 440], "4297": [2352, 2918, 838, 861, 213, 1085, 920, 224, 810, 2109, 2549, 2524, 83, 3054, 2902, 2501, 436, 802, 1147], "4825": [1234, 3152, 2346, 3101, 846, 1687, 3023, 920, 224, 3097, 2642, 1656, 1195, 635, 569, 608, 2362, 276, 2645, 802, 2424, 2737, 1147, 1525, 440], "6859": [1948, 421, 2927, 861, 152, 2003, 920, 224, 3097, 1889, 1607, 2549, 2524, 1391, 2737, 2936, 928, 569, 83, 2384, 2362, 383, 318, 276, 2424, 2501, 1530, 1548, 1147, 2184, 440], "589": [308, 1602, 1344, 2928, 473, 1085, 920, 224, 3097, 1889, 1607, 2524, 2912, 1387, 928, 569, 139, 2724, 2362, 1530, 2723, 2424, 2737, 768, 1028, 1525, 1505], "9473": [1133, 433, 1540, 2928, 473, 1649, 920, 224, 3097, 706, 1074, 1656, 2506, 2216, 2534, 1968, 3061, 928, 569, 2384, 430, 2760, 276, 2424, 2737, 3108, 3057, 763, 1505], "825": [2248, 294, 180, 2448, 653, 1225, 2282, 920, 224, 810, 2204, 1607, 1662, 1764, 1342, 533, 928, 569, 139, 2638, 1245, 3044, 821, 1530], "8445": [670, 476, 949, 2928, 473, 3164, 920, 224, 810, 2204, 588, 1968, 1656, 1764, 257, 2660, 1387, 3061, 569, 1362, 1796, 1245, 2424, 2737, 1213, 2734, 390], "9456": [3068, 216, 516, 3111, 846, 673, 1174, 2814, 119, 451, 2049, 2549, 2524, 83, 2501, 2424, 2737], "6071": [670, 2770, 542, 861, 213, 757, 920, 224, 810, 3142, 635, 2545, 2424, 2737, 1548, 1295, 3057, 82], "283": [1640, 1191, 707, 861, 2484, 48, 920, 224, 3097, 2510, 2549, 2524, 1391, 83, 2501, 2424, 2737, 1147, 440], "3216": [1521, 1943, 591, 2074, 989, 861, 800, 2093, 1047, 2967, 920, 1907, 1612, 2327, 1656, 2385, 1108, 569, 3054, 460, 803, 3051, 2790, 436, 3044, 768, 502, 908, 751], "5633": [308, 3152, 1739, 1177, 653, 1304, 3164, 920, 224, 810, 918, 588, 1108, 257, 1895, 1387, 1213, 3054, 803, 2656, 1796, 2645, 436, 502, 3057, 2178], "8221": [1948, 3152, 1828, 861, 152, 2063, 920, 224, 810, 3135, 1074, 2760, 2645, 2153, 1295, 2341, 257, 569, 1245, 1431, 2130, 139, 2168, 855, 704, 1796, 276, 588, 1764, 635, 430, 1213], "7985": [1449, 1079, 1636, 1623, 653, 210, 846, 920, 224, 3097, 400, 440], "7718": [1234, 3152, 1902, 653, 2243, 3164, 920, 224, 3097, 1025, 1108, 3054, 803, 436, 2645, 2424, 2737, 502, 1147, 440], "5350": [454, 684, 5, 847, 507, 3084, 34, 48, 649, 920, 1144, 1761, 760, 588, 1108, 257, 1213, 928, 3054, 569, 803, 1796, 276, 436, 502, 1627], "7219": [1948, 3152, 593, 653, 2668, 846, 920, 224, 3097, 706, 635, 139, 569, 2362, 69, 1876], "5479": [3068, 3152, 591, 2965, 2928, 1605, 2470, 861, 2938, 920, 1907, 1612, 2327, 569, 2384, 276, 2362], "4326": [1951, 421, 2984, 1047, 3127, 846, 920, 224, 810, 1439, 1108, 2912, 1387, 3054, 803, 436, 2645, 502, 1147, 1525, 1481], "4345": [1726, 433, 1902, 861, 213, 1649, 920, 224, 3097, 2767, 635, 276, 2645, 2424, 2737], "4897": [308, 3152, 496, 861, 621, 2063, 920, 224, 810, 3142, 1391, 2936, 635, 2384, 2645, 2424, 2737, 1147, 751, 440], "4512": [2846, 2060, 630, 653, 1225, 2928, 920, 224, 3097, 706, 1108, 1387, 928, 3054, 569, 803, 276, 436, 821, 502, 1509, 3057], "2131": [2858, 2060, 51, 2522, 1725, 861, 960, 115, 48, 3110, 920, 1907, 1612, 2327, 1391, 139, 569, 1912, 2362, 802, 3044, 2442, 1147, 1525, 440], "7586": [515, 2142, 1081, 2323, 1963, 2063, 920, 224, 3097, 706, 1013, 1548, 569, 2764, 276], "742": [670, 2918, 1512, 653, 2668, 48, 920, 224, 3097, 400, 1656, 569, 859, 1570, 276, 1431, 768, 751], "6120": [438, 2446, 1388, 2928, 1659, 2063, 920, 224, 3097, 1889, 2962, 24, 2384, 1599, 601, 1608, 2153, 2228, 2677, 1481], "9018": [1951, 2770, 1636, 236, 846, 1881, 48, 920, 224, 3097, 400, 2549, 2524, 83, 569, 2501, 2424, 2737], "3685": [1726, 2465, 2256, 2504, 507, 861, 1114, 1315, 653, 505, 920, 1144, 1761, 760, 139, 569, 2335], "9015": [1550, 1143, 2, 2928, 1661, 1649, 920, 224, 3097, 2510, 588, 2524, 2549, 1108, 257, 1213, 83, 2168, 3054, 803, 1796, 276, 2645, 2501, 436, 2153, 502], "2179": [438, 2864, 2223, 1423, 846, 2410, 2063, 920, 224, 810, 2204, 1195, 1108, 635, 2341, 569, 3054, 803, 2362, 802, 436, 502, 763], "1965": [1550, 3152, 2334, 846, 1881, 1085, 920, 224, 810, 1369, 569, 2362], "7348": [3040, 2060, 964, 653, 2668, 846, 920, 224, 3097, 1001, 821], "966": [3048, 433, 1830, 861, 44, 1085, 920, 224, 3097, 706, 588, 257, 2962, 3054, 569, 2902, 608, 1796, 1608, 2645, 436, 1213, 1525], "3016": [1951, 3152, 1214, 1253, 653, 784, 861, 920, 224, 3097, 2510, 2549, 2524, 83, 2501, 2424, 2737, 1028, 1147, 3057], "2129": [1521, 1222, 322, 512, 2928, 1659, 757, 920, 224, 3097, 1997, 1764, 2912, 929, 276, 1245, 1295, 69, 1525], "9194": [1051, 1618, 2745, 846, 1881, 3164, 920, 224, 3097, 400, 257, 635, 3051, 276, 3044, 1548, 2130], "2127": [1449, 911, 3047, 507, 846, 2639, 2834, 846, 487, 920, 1907, 1612, 2327, 2549, 2524, 1195, 83, 139, 2362, 276, 2501, 751], "7753": [2069, 911, 2903, 861, 152, 48, 920, 224, 810, 464, 486, 3057, 2645, 2502], "3923": [2858, 509, 1902, 2928, 131, 861, 920, 224, 3097, 706, 2549, 2524, 2732, 635, 83, 139, 2384, 2501, 802, 2424, 2737, 2677, 751], "6635": [1521, 1222, 3102, 861, 152, 1047, 920, 1144, 1761, 760, 1493, 2645], "7576": [3040, 1618, 2797, 653, 1225, 2063, 920, 224, 3097, 1997, 1195, 1764, 2660, 2479, 569, 1762, 276, 1245, 821, 2442, 1295, 763], "6445": [1521, 1535, 334, 653, 2668, 846, 920, 224, 3097, 1812, 588, 2534, 1108, 257, 1213, 3054, 569, 2384, 803, 1796, 2645, 802, 436, 502, 1147], "8287": [1051, 509, 2652, 861, 107, 1281, 2814, 119, 1644, 2208, 2990, 1391, 2015, 928, 1231, 1147, 2153, 2737, 1548, 1481, 2233, 2661, 1075, 2960, 569, 2362, 802, 1113, 2424, 1525, 2732, 1195, 1387, 139, 83, 2061, 2168, 276, 1839, 1854, 1627, 763, 925, 440, 2549, 2524, 2936, 635, 2384, 883, 2501, 768, 3019, 2734], "2678": [2846, 3152, 580, 846, 3103, 2063, 920, 224, 3097, 706, 1607, 1075, 928, 569, 276, 1530], "6191": [515, 294, 964, 427, 846, 3103, 846, 920, 224, 3097, 706, 704, 802, 2362], "2071": [670, 509, 630, 2448, 861, 152, 757, 920, 224, 3097, 1398, 2549, 2524, 1195, 588, 257, 2962, 83, 139, 2362, 1796, 1608, 2501, 3044, 2424, 2737, 1213], "4161": [308, 3152, 1936, 846, 2596, 2003, 920, 224, 810, 2234, 1195, 718, 1013, 635, 139, 2630, 2764, 822, 2362, 276, 2645, 1113, 821, 2728, 1711, 2594], "6199": [515, 221, 180, 861, 152, 2282, 920, 224, 3097, 400, 859, 828, 1570, 2737, 1548, 1028, 2661, 569, 1912, 2362, 802, 2424, 3044, 1525, 83, 139, 440, 2549, 2524, 2936, 2384, 2501, 2734], "6480": [2665, 166, 1902, 861, 152, 3023, 920, 224, 810, 12, 588, 257, 2936, 635, 139, 569, 855, 2362, 704, 1796, 1431, 768, 1213, 1028, 1147, 1525, 2661], "1601": [2069, 2446, 2346, 71, 861, 2611, 1085, 920, 224, 3097, 706, 1108, 1013, 1362, 2645, 2737, 2153, 2661, 257, 2912, 569, 3054, 2764, 1245, 2424, 2409, 1525, 1195, 2660, 83, 2168, 803, 1796, 502, 2549, 2524, 588, 1764, 635, 2501, 821, 436, 1213, 3057, 390], "8763": [2069, 2864, 949, 2457, 2928, 473, 757, 920, 224, 810, 2204, 139, 569, 1525, 1912, 2912], "8668": [1726, 2446, 466, 688, 861, 2484, 2323, 920, 1144, 1761, 760, 2549, 2524, 83, 2501, 2645, 2424, 2737, 751], "1444": [1199, 1535, 964, 912, 653, 2668, 48, 920, 224, 3097, 2333, 3019, 3088, 2491, 2960], "996": [1951, 2770, 1720, 846, 1372, 1649, 920, 224, 3097, 400, 929, 2384, 2362, 3051, 802, 2424, 2737, 69, 1525, 2734], "1886": [1948, 421, 2223, 1445, 2323, 2070, 757, 920, 224, 810, 2109, 1968, 1108, 1764, 2912, 1895, 3061, 3054, 569, 2178, 803, 2656, 2902, 276, 802, 1245, 2424, 2737, 436, 502, 1525, 751], "7805": [438, 2446, 1636, 861, 2484, 2063, 920, 224, 3097, 400, 2549, 2524, 2661, 1391, 635, 83, 3054, 2902, 2501, 436, 2409, 1147, 440], "1703": [515, 1222, 2346, 653, 2243, 2928, 920, 224, 3097, 706, 1108, 3054, 569, 803, 436, 502, 763], "1389": [1521, 1079, 2281, 653, 2243, 48, 920, 224, 810, 2204, 2384, 2645, 751], "7018": [454, 2770, 964, 653, 2243, 48, 920, 224, 810, 2204, 1764, 635, 1245, 2424, 2737, 751], "3171": [1521, 1222, 629, 2323, 2047, 1649, 920, 224, 3097, 706, 2502, 635, 928, 569, 276, 2424, 2737, 1627, 486], "4556": [1550, 421, 2223, 653, 2243, 3023, 920, 224, 3097, 706, 1195, 2936, 635, 569, 2384, 608, 2362, 276], "8213": [1051, 1565, 1540, 653, 54, 1085, 920, 224, 3097, 706, 3057, 928, 569, 2362, 276, 2645, 1431, 1028, 1505], "2654": [1199, 1535, 1053, 846, 759, 1085, 920, 224, 3097, 400, 635], "105": [1640, 509, 2801, 1047, 2076, 861, 920, 224, 810, 3142, 2728, 966, 1147, 853, 2936], "8983": [3040, 1943, 2903, 653, 2243, 1085, 920, 224, 810, 464, 569, 3044, 1562], "4612": [1726, 1535, 1540, 2928, 473, 1649, 920, 224, 810, 394, 635, 1147, 2645, 3044, 440], "8716": [2858, 2770, 2346, 653, 1499, 1777, 920, 224, 3097, 2642, 1391, 1147, 3051, 2153, 2737, 2677, 1028, 1505, 1876, 2661, 257, 2960, 2912, 569, 2319, 2362, 1245, 802, 3044, 2424, 2409, 69, 1525, 751, 1945, 2130, 1195, 1387, 139, 2168, 1796, 276, 440, 588, 1764, 2936, 635, 2384, 2724, 768, 1213, 3019], "3847": [2846, 1713, 2583, 2132, 653, 784, 2323, 920, 1907, 1612, 2327, 2409, 569, 2661], "3591": [1951, 165, 1798, 861, 2484, 846, 920, 224, 3097, 1408, 1147, 2362], "3760": [1948, 3152, 3077, 861, 152, 2928, 920, 224, 3097, 1025, 588, 1075, 257, 2168, 2061, 1796, 276, 2153, 1213, 2677, 751], "2217": [194, 1222, 2066, 391, 2928, 2351, 846, 920, 1907, 1612, 2327, 569, 2384, 1525, 2936], "8967": [3048, 1535, 692, 653, 126, 846, 920, 224, 3097, 2510, 2549, 2524, 1968, 3061, 83, 569, 2501, 2645, 2424, 2737, 2677], "6151": [1051, 2060, 1636, 2928, 2485, 846, 920, 224, 3097, 706, 1656, 2534, 2015, 2384, 1839, 1113, 3143, 2265, 2285], "9416": [2846, 619, 964, 2928, 1659, 2928, 920, 224, 3097, 706, 929, 569, 2168, 584, 1228, 1147, 1113, 3143, 2265, 69, 2285, 440], "5074": [2248, 2465, 498, 846, 45, 653, 920, 224, 3097, 2510, 1656, 2479, 395, 139, 3161, 1762, 704, 2645], "1919": [2605, 433, 122, 861, 152, 2063, 920, 224, 810, 3142, 1656, 569, 2362, 2645, 2424, 821, 2737, 1028, 2734, 440], "5400": [1234, 3152, 591, 2401, 403, 861, 800, 2397, 653, 1996, 920, 1907, 1612, 2327, 2549, 2524, 2612, 2502, 2936, 83, 2384, 2501, 3108, 486], "8271": [1554, 2446, 1540, 2258, 846, 609, 861, 920, 224, 3097, 1889, 1656, 3054, 569, 2902, 859, 608, 1570, 3004, 436, 69, 1260, 1876], "7354": [454, 2446, 1636, 653, 2243, 1047, 920, 224, 3097, 2510, 1108, 1764, 139, 3054, 569, 608, 803, 436, 2645, 802, 2737, 1245, 502, 2424, 3057], "8301": [308, 2161, 2928, 1785, 1281, 2814, 119, 1644, 2208, 588, 257, 1342, 1796, 2638, 276, 2424, 2737, 1213, 2677, 2734], "7523": [2665, 1535, 504, 861, 2611, 846, 920, 224, 810, 553, 929, 139, 859, 704, 1570, 276, 2645, 69, 1481], "6127": [308, 3152, 2256, 403, 356, 3084, 920, 1144, 1761, 760, 2502, 569, 608, 2677, 486, 751], "8547": [2347, 1417, 964, 861, 2484, 1085, 920, 224, 3097, 706, 966, 2384, 257, 2130, 2936], "9407": [1199, 509, 964, 653, 2243, 1085, 920, 224, 810, 2201, 1195, 86, 1342, 2362, 2638, 768, 751], "1276": [2347, 911, 3013, 846, 1582, 266, 2814, 119, 1644, 1850, 1013, 2645, 2153, 2737, 1028, 257, 569, 2764, 2362, 318, 1245, 2424, 802, 2184, 1195, 1387, 139, 2168, 83, 1796, 276, 588, 2549, 2524, 1764, 2936, 635, 2384, 2724, 2501, 1213, 1147, 3057], "2109": [308, 2080, 2768, 861, 152, 2323, 920, 224, 3097, 706, 1968, 3061, 928, 2362, 768, 2424, 2737], "4302": [2665, 166, 964, 362, 861, 213, 1085, 920, 224, 3097, 1997, 1656, 2936, 2168, 276, 2645, 2153, 1147, 2661], "7281": [2069, 378, 861, 213, 48, 920, 224, 3097, 706, 2737, 1764, 569, 2168, 859, 2362, 1570, 2645, 1245, 2424, 2153, 1147, 751], "8919": [438, 684, 964, 2018, 861, 468, 1649, 920, 224, 3097, 400, 1656, 2962, 2168, 1608, 2645, 2153, 3108], "7937": [308, 3152, 498, 2175, 861, 2861, 2282, 920, 1907, 1612, 2327, 1656, 569, 2478, 1113, 1147, 2661], "3644": [1521, 2005, 955, 2928, 1659, 846, 920, 224, 3097, 706, 2549, 2524, 2936, 635, 83, 2384, 2501, 2645, 2424, 2737], "2637": [1948, 1565, 1636, 861, 2484, 1047, 920, 224, 3097, 706, 588, 1213, 1796, 257, 751], "5028": [670, 2465, 593, 653, 2668, 48, 920, 224, 3097, 706, 2534, 2912, 635, 569, 2384, 608], "7848": [1948, 3152, 1332, 653, 210, 2928, 920, 224, 3097, 400, 11, 1895, 859, 1570, 2645, 2153, 1481, 1876, 1656, 929, 3054, 569, 2362, 802, 2409, 69, 1525, 946, 2732, 2534, 139, 1856, 2168, 704, 1854, 2384, 608, 436, 1147], "4114": [2605, 1222, 1081, 887, 2323, 676, 2063, 920, 224, 3097, 1889, 1656, 572, 1606, 2479, 1762, 768, 2424, 2737, 1481], "6831": [308, 3152, 1735, 861, 2505, 861, 920, 224, 810, 2204, 1656, 440, 1391, 1147], "3697": [1199, 2918, 2928, 892, 48, 920, 224, 3097, 400, 588, 257, 1387, 635, 139, 2168, 859, 1570, 1796, 802, 2645, 3044, 2153, 1213], "6570": [1948, 3152, 2801, 653, 2668, 1085, 920, 224, 810, 2201, 1195, 1895, 635, 3054, 569, 2902, 2656, 2362, 276, 436, 3044, 2178], "5926": [2858, 2465, 964, 2868, 861, 152, 48, 920, 224, 3097, 706, 2350, 1391, 2936, 2384, 2362, 440, 3092, 768, 2409, 1147, 1745, 2661], "4215": [670, 166, 955, 2928, 1126, 48, 920, 224, 810, 1369, 2732, 1245, 569, 1764, 276], "6483": [1550, 3152, 2963, 861, 155, 1649, 920, 1907, 2185, 1043, 751, 996, 276, 2645, 768, 2424, 2737, 3057], "3344": [1726, 294, 2644, 1060, 846, 673, 1649, 920, 1144, 1761, 760, 929, 139, 569, 1912, 69, 1525], "4501": [194, 509, 2223, 861, 2611, 757, 920, 224, 3097, 2642, 588, 1075, 1108, 257, 2359, 635, 1213, 3054, 2061, 803, 1796, 436, 768, 2475, 502], "7729": [1951, 421, 1540, 861, 621, 3023, 920, 224, 3097, 706, 635, 2612, 569, 2645, 2661], "8818": [454, 1535, 29, 1232, 861, 2484, 2063, 920, 224, 3097, 706, 1607, 2350, 2734, 751, 928, 569, 3092, 1530, 1525, 1745], "1215": [1726, 2770, 1106, 2759, 2928, 2485, 48, 920, 224, 3097, 2510, 1548, 326, 2676, 1876], "8459": [839, 294, 1081, 2928, 2198, 48, 920, 224, 3097, 2333, 588, 257, 2912, 1387, 1796, 276, 2645, 1213, 1525, 3057], "4947": [194, 433, 79, 1412, 861, 213, 1085, 920, 224, 3097, 2767, 2734, 257, 2130, 569, 3044, 751], "2758": [3068, 2918, 2927, 1047, 3127, 2282, 920, 224, 3097, 2767, 2549, 2524, 2936, 635, 83, 2384, 2501, 2645, 2424, 2737], "7630": [1449, 2060, 2868, 653, 2243, 1649, 920, 224, 810, 2204, 2990, 1895, 1231, 859, 1570, 2645, 1481, 1656, 929, 1606, 3054, 569, 2362, 2656, 318, 802, 1431, 1113, 69, 2184, 1195, 139, 855, 704, 2178, 588, 436, 3088], "4449": [89, 911, 2801, 2928, 131, 48, 920, 224, 810, 2964, 2549, 2524, 83, 2501, 2645, 276, 2424, 2737], "5176": [515, 3152, 2223, 2928, 497, 757, 920, 224, 810, 1102, 1895, 2737, 1548, 1481, 2661, 257, 929, 569, 3054, 2656, 2424, 69, 2709, 1387, 704, 1796, 276, 2178, 440, 588, 635, 2724, 436, 1213, 1147, 3057], "451": [308, 2984, 846, 2987, 1085, 920, 224, 3097, 706], "3354": [1550, 165, 2702, 653, 1569, 2063, 920, 224, 3097, 400, 1195, 569, 821, 2424, 2645, 2737], "8866": [1948, 421, 899, 2108, 653, 784, 2928, 920, 224, 3097, 329, 1108, 3054, 569, 803, 608, 436, 2424, 2737, 502], "4381": [1554, 1222, 1540, 861, 621, 2063, 920, 224, 810, 2204, 2549, 2524, 966, 83, 2362, 276, 2501, 1028, 1147], "7751": [1121, 2770, 2984, 846, 2987, 2003, 920, 224, 810, 464, 569], "8530": [2347, 2918, 217, 653, 210, 2928, 920, 224, 810, 2204, 1074, 2384, 430, 2760, 2068, 821], "6088": [3068, 378, 964, 554, 653, 1403, 757, 920, 224, 3097, 706, 2549, 2524, 83, 569, 608, 2501, 2645, 751], "6621": [515, 2142, 109, 656, 861, 231, 48, 920, 224, 3097, 329, 276, 802, 2424, 2737, 2362], "6650": [1550, 509, 899, 1503, 846, 2639, 1649, 920, 224, 3097, 329, 2549, 2524, 2936, 83, 2384, 2501, 2734], "3258": [1951, 2770, 640, 715, 653, 2243, 1649, 920, 224, 3097, 1291, 440, 1525, 2362], "6160": [1948, 421, 2801, 2294, 846, 1881, 757, 920, 224, 3097, 706, 1656, 1764, 2709, 2153, 569, 1599, 1245, 1113, 3143, 2265, 2228, 2285, 440], "4933": [1550, 509, 580, 845, 861, 621, 2282, 920, 224, 3097, 1889, 859, 1570, 2265, 2153, 2285, 2661, 1656, 257, 569, 3108, 2362, 1113, 1525, 2130, 1195, 2534, 139, 2168, 440, 675, 2384, 3143, 2194, 1147], "160": [454, 1417, 1540, 653, 2668, 3164, 920, 224, 3097, 706, 326, 2960, 635, 928, 3054, 2168, 2902, 276, 436, 2153, 2676, 3019, 1525], "8755": [2554, 1417, 1592, 653, 210, 48, 920, 224, 3097, 400, 2549, 2524, 928, 2501, 83], "1582": [89, 2864, 3058, 861, 2484, 2323, 920, 224, 3097, 2510, 2502, 2406, 1013, 2384, 2764, 2478, 276, 486], "8186": [1199, 166, 964, 2768, 653, 2668, 2063, 920, 224, 3097, 706, 588, 257, 1213, 751, 3054, 2902, 2823, 1796, 436, 3044, 1295, 3057], "9098": [1449, 1079, 3047, 660, 507, 861, 800, 503, 2928, 552, 920, 1907, 2302, 896, 2549, 1968, 2524, 1391, 2936, 3061, 83, 2384, 2501, 2424, 2737, 1147, 440], "1257": [1521, 1222, 3047, 3027, 3109, 653, 1862, 1210, 861, 218, 920, 1907, 1612, 2327, 929, 139, 1810, 2362, 1147, 704, 2886, 69, 440], "9301": [2665, 509, 262, 1878, 653, 784, 861, 920, 224, 3097, 1291, 2549, 2524, 83, 569, 2501], "1902": [2069, 2918, 1350, 2253, 861, 231, 3164, 920, 224, 3097, 329, 1764, 894, 635, 569, 1599, 1245, 3044, 1431, 2153, 2228, 2677, 1505], "7600": [3040, 2864, 2346, 861, 2611, 2003, 920, 224, 3097, 1889, 1993, 2960, 751, 928, 569, 2362, 276, 768, 1028, 3019, 1505], "8420": [2554, 166, 2801, 2157, 2323, 2070, 48, 920, 224, 3097, 706, 1656, 2936, 635, 139, 569, 2384, 1912, 318, 3044, 2424, 2737, 768, 1525, 2184, 3057], "802": [2352, 433, 2346, 2928, 473, 757, 920, 224, 3097, 2642, 588, 257, 2912, 635, 569, 1796, 276, 802, 3044, 768, 1213, 1525], "2259": [515, 294, 964, 861, 152, 1777, 920, 224, 3097, 1001, 2734, 1764, 2479, 569, 2362, 1762, 821, 1245, 2645, 1028, 3057], "8608": [1951, 3152, 2758, 1361, 861, 800, 3164, 920, 1907, 1612, 2777, 1147], "9373": [308, 3152, 2256, 13, 403, 2323, 595, 665, 653, 863, 920, 1144, 1761, 760, 1607, 1075, 928, 569, 2061, 1530, 440], "144": [2605, 2465, 854, 653, 1499, 1174, 2814, 119, 451, 124, 780, 929, 2936, 635, 139, 2384, 704, 2409, 3051, 318, 276, 768, 1548, 69, 2184, 2661], "5461": [2858, 1417, 2121, 3084, 971, 846, 920, 1907, 1612, 2327, 257, 929, 139, 569, 1228, 69, 440], "6699": [1051, 911, 964, 2928, 1659, 3164, 920, 224, 3097, 706, 588, 257, 929, 1147, 704, 1796, 802, 768, 1213, 1028, 69, 2734, 1876], "8388": [1051, 421, 964, 2714, 861, 2484, 3164, 920, 224, 3097, 706, 569, 2545, 2168, 2153], "5304": [2347, 166, 2801, 653, 2243, 1777, 2814, 119, 451, 124, 588, 257, 2936, 1362, 2384, 2362, 1796, 276, 2424, 2737, 1548, 1213, 1028, 1147, 390], "5262": [1449, 2446, 2354, 653, 210, 349, 920, 224, 3097, 329, 139, 1147, 2645], "6085": [2554, 378, 2481, 2323, 1697, 48, 920, 1907, 2185, 1043, 588, 257, 1387, 569, 859, 608, 1570, 1796, 2645, 3044, 1213, 440], "3714": [515, 221, 2256, 2504, 507, 861, 1114, 2316, 653, 505, 920, 1144, 1761, 760, 588, 257, 1895, 3054, 569, 608, 2656, 1796, 436, 1213, 2178], "6131": [1449, 1713, 2903, 2323, 1963, 3164, 920, 224, 810, 394, 1656, 1195, 257, 929, 2709, 139, 569, 859, 2362, 704, 1570, 440, 69, 1481, 2130, 1876], "4932": [1133, 2060, 60, 2597, 846, 673, 3164, 920, 224, 3097, 400, 2165, 257, 139, 569, 1147, 2130], "975": [2858, 1535, 3077, 2323, 1963, 861, 920, 224, 3097, 1025, 588, 1968, 257, 3061, 2168, 569, 1796, 2645, 2153, 1213], "7427": [2665, 911, 2978, 2058, 861, 152, 2323, 920, 224, 3097, 1025, 588, 257, 139, 1796, 1431, 1213], "4362": [454, 421, 949, 2928, 497, 2063, 920, 224, 810, 2204, 929, 704, 2813, 276, 2983, 69], "5554": [1726, 911, 1540, 1212, 861, 468, 48, 920, 224, 810, 3142, 588, 257, 139, 3054, 2902, 1796, 436, 768, 2424, 2737, 802, 1213, 751], "1132": [1121, 1618, 2801, 2186, 653, 2243, 757, 920, 224, 810, 1428, 2549, 2524, 2912, 1013, 83, 2764, 2501, 276, 2424, 2737, 1525], "2511": [3040, 1222, 322, 2928, 2600, 2063, 920, 224, 3097, 1997, 1607, 588, 2737, 257, 2912, 928, 569, 2319, 2362, 1796, 276, 802, 2424, 1530, 1213, 1525], "8421": [3040, 1535, 1129, 861, 420, 2282, 920, 224, 3097, 706, 1764, 2660, 569, 821, 1245, 3044, 1028, 1147, 1505], "7801": [2554, 1222, 964, 846, 3103, 861, 920, 224, 3097, 706, 1607, 2524, 2549, 635, 928, 569, 83, 1530, 2501, 2645, 2424, 2737, 3057], "1342": [2846, 2464, 79, 653, 1304, 1777, 2814, 119, 1644, 1370, 1108, 2737, 2153, 1656, 2960, 3054, 318, 2424, 3019, 2184, 841, 2168, 803, 3161, 276, 502, 440, 395, 1447, 635, 719, 436, 1147], "4668": [1199, 1191, 787, 846, 1881, 3023, 2814, 119, 451, 957, 2549, 2524, 1895, 2479, 635, 83, 3019, 853, 2362, 1562, 440, 276, 1762, 2424, 2501, 2737, 2677, 1147, 1028], "124": [2605, 2770, 2801, 653, 1304, 3023, 920, 224, 810, 2204, 2549, 2524, 2936, 635, 83, 2384, 2501, 2645], "4489": [2347, 2446, 1081, 861, 2845, 48, 920, 224, 810, 3142, 588, 257, 1213, 2384, 2362, 1796, 3044, 2424, 2737, 2442, 2341], "8764": [2554, 216, 2006, 861, 213, 1649, 920, 224, 3097, 1001, 588, 2732, 257, 139, 2384, 1796, 276, 1213, 1854], "9130": [1133, 684, 1540, 1412, 861, 1594, 1085, 920, 224, 810, 464, 1075, 929, 2912, 635, 139, 569, 2168, 2061, 704, 276, 2645, 2153, 69, 1525, 1876], "5342": [2248, 166, 712, 846, 758, 2814, 119, 1644, 1198, 2502, 139, 2319, 276, 2645, 3044, 802, 486], "6738": [515, 3152, 1636, 653, 2668, 846, 920, 224, 3097, 706, 588, 1607, 966, 257, 928, 569, 2384, 1796, 2645, 1530, 1213], "2749": [1234, 3152, 964, 653, 2668, 846, 920, 224, 3097, 706, 2549, 2524, 1764, 2737, 83, 569, 2168, 2501, 1245, 2645, 2424, 2153, 440], "8517": [2598, 509, 861, 2124, 846, 920, 224, 810, 3142, 2912, 2936, 139, 569, 2384, 318, 1525, 2184, 3057], "5339": [1234, 3152, 3077, 861, 1320, 3164, 920, 224, 3097, 1398, 2549, 2524, 1108, 2936, 2962, 83, 3054, 2384, 803, 1608, 802, 2914, 436, 2501, 2409, 502, 2661], "4028": [670, 619, 1381, 2024, 861, 1974, 3084, 920, 1144, 1761, 760, 1113], "1851": [2347, 509, 2801, 653, 1093, 2282, 920, 224, 810, 1102, 1108, 1387, 3054, 1362, 2724, 803, 436, 2645, 2424, 2737, 502, 390], "2867": [454, 2770, 2281, 846, 759, 1174, 2814, 119, 451, 1119, 2502, 1645, 569, 2384, 859, 1570, 1278, 1028, 1147, 486, 2661], "4832": [2605, 2770, 1937, 887, 861, 152, 2323, 920, 224, 3097, 706, 1895, 2936, 3054, 569, 2384, 608, 828, 2656, 318, 2645, 3044, 2424, 436, 1147, 2184, 2178, 2661], "7397": [2665, 3152, 2223, 2678, 846, 1122, 3045, 2814, 119, 1644, 2753, 1147, 2645, 2424, 802, 2737], "1640": [438, 221, 51, 861, 231, 653, 920, 1907, 1612, 2327, 3057], "3916": [2846, 1696, 2121, 1047, 1649, 920, 224, 3097, 400, 1895, 859, 1570, 2153, 2737, 1876, 1656, 3054, 569, 2362, 2656, 802, 2424, 69, 1195, 139, 1856, 83, 2168, 1796, 763, 2178, 588, 2524, 2549, 2501, 436, 1213, 1147, 2734], "1445": [670, 433, 640, 2150, 861, 2484, 861, 920, 224, 3097, 329, 635, 569, 1525, 276], "5570": [1133, 2060, 1047, 2452, 653, 920, 224, 810, 3142, 1548, 276, 2384], "5113": [1449, 509, 964, 861, 489, 861, 920, 224, 3097, 1889, 2534, 1108, 3054, 2384, 803, 436, 2645, 502], "8701": [3040, 1535, 2801, 98, 653, 1304, 1649, 920, 224, 3097, 1889, 588, 1968, 257, 1895, 3061, 569, 2384, 1796, 2645, 2424, 2737, 1213, 763], "168": [2598, 911, 2223, 3167, 653, 1304, 1085, 920, 224, 810, 2109, 2549, 2524, 2709, 83, 2501, 2424, 2737, 1548], "1554": [438, 2446, 1902, 2294, 2323, 2070, 1649, 920, 224, 3097, 706, 1968, 2479, 3061, 1362, 1762, 318, 2645, 2424, 276, 2737, 2184, 390], "2416": [1726, 433, 1902, 767, 861, 213, 2919, 920, 224, 810, 269, 1656, 2549, 2524, 1108, 2936, 83, 3054, 569, 2384, 803, 2501, 2645, 3044, 436, 502, 1147, 2734], "9087": [2554, 216, 1636, 653, 210, 3164, 920, 224, 3097, 400, 1607, 751, 928, 569, 139, 802, 1530, 1295, 3057], "6403": [1199, 619, 1460, 848, 861, 1974, 48, 920, 224, 3097, 2510, 1195, 717, 569, 2384, 2362, 2735], "7497": [670, 2464, 2223, 861, 1955, 2282, 920, 224, 3097, 1889, 1195, 2912, 2362, 1028, 1147, 1525, 440], "8821": [1521, 1535, 2975, 767, 861, 152, 2282, 920, 224, 810, 1369, 1656, 2936, 2384, 608, 2424, 2737], "7479": [2846, 2446, 794, 653, 1569, 2282, 920, 224, 3097, 400, 2549, 2524, 83, 2501, 2645, 2424, 2737, 3057], "4352": [1951, 3152, 3102, 2928, 2485, 861, 920, 224, 3097, 329, 1108, 2479, 3054, 803, 1762, 436, 2424, 768, 2737, 502, 2734], "7450": [1199, 1191, 640, 2323, 2070, 846, 920, 224, 3097, 706, 588, 2549, 2524, 1108, 257, 635, 1213, 928, 3054, 83, 2384, 803, 1796, 2501, 436, 2424, 2737, 502, 1509], "6798": [308, 2223, 653, 2243, 3164, 920, 224, 810, 2204, 2549, 2524, 83, 3054, 2902, 2362, 276, 2501, 2424, 436, 2737, 1028, 1147], "917": [438, 1535, 3022, 2928, 1616, 3084, 920, 1907, 1612, 2327], "5394": [1121, 2770, 861, 152, 48, 920, 224, 810, 3142, 635, 440, 2384, 1525, 2936], "9095": [1449, 1535, 1567, 2928, 2485, 1649, 920, 224, 3097, 329, 588, 1607, 928, 569, 1796, 2645, 1530, 1213], "5500": [308, 1540, 861, 152, 2063, 920, 224, 3097, 706, 2677, 465], "7415": [1449, 433, 964, 2500, 653, 2668, 653, 920, 224, 3097, 706, 588, 2534, 2936, 139, 2168, 2384, 853, 1796, 440, 802, 2153, 1213, 1147, 751, 2661], "1940": [2347, 2864, 357, 653, 2668, 2063, 920, 1907, 2185, 1043, 569, 169], "455": [2554, 2005, 1540, 861, 1621, 2928, 920, 224, 3097, 706, 2549, 2524, 928, 83, 1362, 2501, 2645, 276, 1627, 390], "8597": [2554, 476, 2975, 653, 1304, 2919, 2814, 119, 1644, 2208, 588, 2524, 2549, 257, 83, 1796, 318, 2501, 2645, 2424, 2737, 276, 1213, 2184], "8541": [670, 1535, 1045, 1047, 555, 653, 920, 224, 3097, 2510, 2990, 139, 2384, 1231, 276, 1113], "7788": [2605, 433, 1901, 846, 1881, 1281, 2814, 119, 2996, 1391, 929, 1606, 139, 2362, 1147, 802, 2424, 2737, 69, 440], "7490": [308, 3152, 3102, 2477, 653, 210, 653, 920, 224, 3097, 1291, 2549, 2524, 1108, 635, 83, 3054, 2902, 803, 2409, 2501, 2645, 2424, 436, 2737, 1548, 502, 1147, 2661], "6931": [3040, 1222, 472, 2928, 473, 1777, 2814, 119, 451, 957, 2015, 928, 3051, 1530, 1481, 1876, 2023, 929, 569, 2362, 2480, 69, 1607, 2732, 2534, 139, 2643, 704, 1839, 276, 1211, 1178, 2384], "9081": [1051, 433, 2354, 2928, 1616, 2323, 920, 224, 3097, 400, 440, 1147, 2362], "744": [2665, 476, 964, 73, 653, 2668, 1649, 920, 224, 3097, 706, 635, 139, 2645, 2424, 2737], "8590": [2554, 166, 1086, 861, 152, 2063, 920, 224, 3097, 329, 1607, 928, 569, 1530, 1548, 1028, 1147], "1807": [1199, 509, 1636, 2928, 2145, 846, 920, 224, 3097, 264, 1108, 2479, 635, 928, 3054, 569, 803, 1762, 2645, 436, 502], "8001": [3040, 2060, 1309, 653, 1727, 653, 920, 224, 3097, 705, 1656], "7299": [1554, 619, 640, 1298, 2928, 1659, 653, 920, 224, 3097, 400, 1108, 3054, 569, 803, 436, 2424, 2645, 2737, 802, 502], "6001": [438, 378, 441, 653, 2668, 846, 920, 224, 3097, 400, 2534, 1391, 257, 569, 2168, 2384, 859, 1570, 1147, 1525, 440], "3933": [1550, 2060, 2984, 861, 44, 3164, 920, 224, 3097, 706, 1764, 2936, 2962, 2299, 569, 2384, 1608, 821, 1245, 2645, 3057], "4023": [2846, 2446, 1107, 861, 2484, 861, 920, 224, 3097, 2510, 1074, 257, 569, 430, 2760, 276, 2130], "190": [2347, 2465, 2300, 3084, 2422, 846, 920, 224, 3097, 1025, 2362, 2645, 821, 3044, 1028, 1505], "6102": [2858, 221, 3155, 1127, 2928, 2351, 3084, 920, 1144, 1761, 760, 588, 1108, 257, 635, 502, 3054, 803, 1796, 276, 436, 2645, 1213], "4334": [1726, 2770, 861, 2484, 3164, 920, 224, 3097, 1025, 2549, 2524, 1391, 83, 569, 440, 2501, 2409, 1147, 2970, 2661], "3747": [515, 1222, 498, 2024, 2928, 2836, 48, 2671, 920, 1907, 1612, 795, 257, 1505, 395, 3161, 1548, 2130], "8880": [2069, 1713, 653, 2668, 861, 920, 224, 3097, 1291, 1993, 2153, 928, 2168, 2424, 2737, 751], "1248": [2554, 2464, 2256, 13, 403, 653, 1862, 653, 863, 920, 1144, 1761, 760, 2962, 569, 2384], "5774": [1234, 3152, 1540, 2769, 653, 1506, 1085, 920, 224, 810, 2201, 1656, 1607, 2534, 2936, 928, 569, 2384, 139, 1530, 3057], "3077": [454, 911, 2256, 632, 989, 2928, 1605, 1962, 2063, 920, 1144, 1761, 760, 929, 1387, 1691, 2960, 3019, 2724, 704, 2424, 2737, 69, 751], "3253": [1951, 2770, 964, 861, 2611, 3164, 920, 224, 3097, 706, 588, 257, 2502, 2456, 1796, 276, 821, 2645, 1213, 486, 751], "8876": [2665, 1618, 1053, 861, 152, 2282, 920, 224, 3097, 2542, 2549, 2524, 83, 569, 2384, 276, 2501, 1548], "3531": [839, 1222, 2355, 2323, 676, 48, 920, 224, 810, 464, 2962, 704, 3051, 1608, 3044], "8602": [1121, 509, 2334, 861, 152, 510, 920, 224, 3097, 400, 3044], "2696": [2069, 509, 428, 830, 2928, 1659, 1649, 920, 224, 3097, 400, 2549, 2524, 635, 83, 569, 608, 2501, 2645, 821], "8328": [2665, 221, 955, 735, 861, 2611, 1174, 2814, 119, 1644, 1370, 2912, 2479, 3054, 2902, 1762, 276, 436, 1525, 2734], "6518": [2069, 378, 357, 3084, 1085, 920, 1907, 1612, 2327, 1656, 2960, 2015, 2962, 3019, 569, 584, 1228, 1608, 2645, 3044, 2424, 2737, 276, 1839, 1147, 440], "2320": [1449, 307, 29, 2809, 653, 2243, 1085, 920, 224, 3097, 706, 486, 2912, 1387, 2502, 635, 2168, 1362, 276, 2645, 2153, 1525, 751, 390], "8803": [1554, 294, 1363, 861, 107, 266, 2814, 119, 1644, 1198, 588, 257, 1796, 318, 276, 3044, 1213, 2184, 1505], "4608": [1550, 911, 2052, 653, 524, 846, 920, 224, 3097, 1025, 2549, 2524, 1391, 2936, 83, 2384, 2501, 2645, 276, 1147, 751, 440], "7607": [2554, 166, 322, 861, 1320, 48, 920, 224, 810, 2101, 1391, 2936, 2168, 2362, 440, 2153, 1147, 2661], "4903": [1554, 509, 1901, 3052, 861, 468, 3023, 920, 224, 810, 1965, 1147, 440, 1391, 2734, 2362], "6146": [670, 378, 861, 2484, 48, 920, 224, 810, 545, 929, 3032, 635, 569, 2424, 2737, 3108, 69, 2238], "2564": [2352, 509, 3122, 653, 2243, 2063, 920, 224, 810, 2109, 1195, 635, 1699, 139, 569, 2362, 276], "2509": [2598, 166, 838, 1741, 846, 3103, 2282, 920, 224, 810, 2204, 2549, 2524, 2936, 83, 569, 2384, 2362, 276, 2501, 2424, 2737, 1548, 1028, 1147], "1343": [670, 433, 642, 2097, 403, 653, 181, 48, 3110, 920, 1907, 2302, 896, 2612, 1195, 1764, 2912, 2962, 2582, 569, 2384, 2362, 1608, 1245, 2424, 2737, 1525], "5425": [2598, 1079, 51, 403, 2323, 595, 2784, 3164, 920, 1144, 1761, 760, 1656, 2549, 2524, 2936, 83, 2384, 3051, 2501, 2645, 2424, 3044, 2737], "3287": [1640, 3152, 1540, 861, 152, 2282, 920, 224, 810, 3142, 3051, 3044], "5175": [1550, 1618, 640, 2928, 473, 48, 920, 224, 810, 2204, 2660, 1013, 2764, 318, 276, 3057, 2184, 751], "8067": [1948, 3152, 964, 362, 2928, 1659, 1085, 920, 224, 810, 1614, 2502, 569, 2061, 2362, 768, 486, 440], "5466": [2069, 619, 653, 861, 920, 224, 3097, 1328, 588, 257, 2130, 635, 139, 569, 608, 1796, 821, 2424, 2914, 2737, 1213, 751], "1230": [2248, 433, 1936, 846, 3103, 2003, 920, 224, 810, 2234, 2534, 2034, 569, 2384, 2362, 133], "1162": [1948, 421, 1081, 846, 3103, 3164, 920, 224, 3097, 706, 2912, 2574, 569, 2384, 162, 276, 3044, 1147, 440], "900": [2858, 216, 480, 947, 861, 2484, 653, 920, 224, 3097, 329, 751, 326, 1525, 2676, 440], "6489": [2665, 509, 1902, 653, 2243, 1085, 920, 224, 3097, 706, 1764, 2912, 2585, 569, 276, 1245, 2424, 2737, 1525, 1505], "1222": [2598, 2060, 49, 2024, 2323, 2704, 1047, 920, 224, 3097, 329, 1195, 2645, 2424, 2737], "6196": [2605, 1079, 1902, 861, 213, 757, 920, 224, 810, 2204, 588, 2524, 2549, 257, 83, 855, 704, 1796, 2501, 2424, 1431, 2737, 1213], "3768": [2248, 2142, 1735, 861, 2484, 861, 920, 224, 810, 3142, 1113], "452": [2665, 509, 2482, 2045, 507, 361, 2928, 1605, 653, 1080, 920, 1907, 2302, 896, 2549, 2524, 717, 83, 2735, 2501], "7138": [2605, 684, 496, 2928, 1661, 1649, 920, 224, 3097, 400, 1147, 2645, 2424, 53, 2737], "2869": [670, 1417, 580, 2323, 1963, 1085, 920, 224, 3097, 706, 2936, 24, 569, 2384, 601, 276, 2424, 2737], "8822": [438, 2465, 426, 861, 2484, 48, 920, 224, 810, 1161, 2534, 929, 2153, 928, 569, 2168, 139, 2384, 276, 2424, 768, 2737, 69, 1509, 751], "769": [89, 216, 861, 152, 2928, 920, 224, 810, 3142, 2341, 2075, 569], "2008": [308, 3152, 2851, 2928, 793, 1085, 920, 224, 810, 3142, 276], "718": [515, 221, 2140, 861, 425, 2063, 920, 224, 810, 1369, 2819, 1764, 257, 2912, 1447, 139, 569, 2362, 704, 719, 1245, 3044, 763, 2130, 841], "5811": [2858, 294, 955, 861, 213, 2330, 2814, 119, 451, 957, 2936, 1013, 2764, 1028, 1147, 2734, 2661], "8352": [1133, 1618, 2903, 861, 213, 1649, 920, 224, 810, 2204, 2936, 855, 569, 2384, 1113, 2661], "2104": [2554, 1417, 333, 2698, 861, 213, 2919, 920, 224, 810, 1369, 2549, 2524, 2737, 83, 2168, 2501, 2645, 2424, 2153, 350, 1028, 1147, 2734], "3139": [1550, 1079, 452, 653, 1093, 2919, 2814, 119, 1644, 2208, 2912, 569, 276, 1147, 1525, 440], "3509": [2352, 1222, 923, 2928, 1495, 653, 920, 224, 3097, 706, 2549, 2524, 1607, 83, 569, 928, 2501, 1530], "4817": [2347, 476, 2281, 653, 2243, 2063, 920, 224, 3097, 1889, 635, 928, 276, 2645, 2424, 2737, 751], "4378": [1199, 1222, 2928, 331, 48, 920, 224, 810, 3142, 2645, 751, 440], "6357": [194, 2864, 1081, 2928, 1884, 846, 920, 224, 3097, 400, 2549, 2524, 1764, 635, 83, 569, 2501, 1245, 2645, 821], "622": [1948, 3152, 3047, 1469, 861, 800, 1137, 48, 521, 920, 1907, 1612, 2327, 1391, 2709, 1645, 2362, 1147, 318, 69, 2184, 3057, 440], "2901": [670, 2864, 949, 2928, 1659, 861, 920, 224, 810, 2964, 1864], "5112": [839, 1191, 2323, 1382, 861, 920, 224, 3097, 400, 276], "4471": [2248, 2464, 1081, 861, 213, 2282, 920, 224, 810, 553, 1764, 929, 635, 139, 569, 2168, 704, 1245, 802, 3044, 2153, 69], "6765": [2352, 1222, 1332, 1187, 861, 2172, 861, 920, 224, 3097, 706, 821, 2384, 2424, 3057, 2737], "2783": [1449, 509, 949, 861, 152, 48, 920, 224, 810, 2204, 635, 569, 608], "1819": [1726, 2770, 964, 424, 861, 1746, 2063, 920, 224, 393, 2810, 929, 2936, 635, 569, 2384, 704, 276, 2424, 2737, 69, 2734], "7": [670, 1535, 591, 1469, 861, 800, 2093, 48, 418, 920, 1907, 1612, 2327, 350, 257, 2130], "3146": [1133, 433, 1056, 653, 359, 3164, 920, 224, 3097, 400, 1794, 635, 1691, 928, 2424, 2737, 1627], "4557": [1133, 1535, 593, 861, 2484, 1085, 920, 224, 3097, 706, 3051, 318, 2645, 3044, 2184], "7457": [2858, 1713, 1926, 861, 1564, 1047, 920, 224, 2798, 606, 2216], "476": [1521, 1943, 2360, 846, 1881, 48, 920, 224, 2867, 1607, 928, 569, 2168, 2362, 1530, 2153], "6734": [2598, 1191, 1636, 1235, 653, 2668, 3164, 920, 224, 3097, 706, 588, 486, 1195, 257, 2502, 2912, 569, 2362, 1796, 768, 1213, 1525, 751], "1591": [1051, 2446, 60, 2928, 1661, 861, 920, 224, 3097, 400, 1108, 929, 2936, 635, 3054, 2384, 803, 436, 2645, 2424, 2737, 502, 69], "7272": [2605, 2465, 29, 2994, 861, 1974, 48, 920, 224, 3097, 400, 588, 257, 2479, 1013, 139, 569, 2764, 608, 1762, 1796, 1213, 3057], "1747": [1234, 3152, 964, 653, 210, 48, 920, 224, 3097, 706, 588, 257, 2384, 1796, 1548, 1213, 1028, 1147], "5015": [1726, 1417, 2440, 792, 653, 2119, 861, 920, 224, 3097, 329, 569, 3044, 608], "8696": [1449, 2770, 2984, 653, 1225, 861, 920, 224, 810, 1531, 569, 2362], "4917": [1521, 1191, 5, 847, 507, 653, 181, 1138, 653, 974, 920, 1144, 1761, 760, 1656, 635, 2645, 1525, 1387], "5874": [2554, 684, 2006, 633, 653, 1740, 48, 920, 224, 3097, 706, 1607, 588, 1108, 257, 929, 1213, 928, 3054, 569, 803, 704, 1796, 436, 1530, 502, 69], "881": [194, 2446, 2354, 1047, 1189, 48, 920, 224, 3097, 400, 318, 802, 2645, 2184], "372": [1948, 3152, 1301, 861, 44, 757, 920, 224, 3097, 706, 1839, 2645, 3057], "2763": [2846, 1696, 1937, 653, 2243, 1085, 920, 224, 3097, 1889, 2962, 1013, 2764, 276, 2645, 2424, 1608, 2737, 1548], "317": [2069, 619, 2281, 1047, 3072, 757, 920, 224, 3097, 706, 2549, 2524, 83, 2501, 2645, 276, 2914, 1147], "5032": [2352, 2465, 2903, 861, 489, 1085, 920, 224, 3097, 2642, 1387, 2936, 635, 855, 2384, 2724, 2362, 704, 2645, 2424, 1431, 2737, 802, 821, 1028], "9309": [515, 165, 628, 100, 653, 2243, 2063, 920, 224, 810, 2201, 1656, 2732, 2534, 257, 2912, 929, 569, 2384, 1598, 859, 704, 1570, 276, 3108, 1854, 69, 1525, 2130, 1876], "4257": [1199, 1191, 964, 3084, 2835, 1649, 920, 224, 3097, 1889, 86, 2479, 2406, 1013, 2645, 2153, 2265, 2737, 2285, 1505, 569, 2764, 1245, 2424, 1113, 2599, 751, 2534, 1195, 2168, 276, 588, 1764, 2936, 2384, 1762, 821, 3143, 2734], "1258": [2598, 2446, 146, 846, 673, 2282, 2814, 119, 451, 1718, 1147, 802, 2424, 2737], "6473": [1948, 1565, 1937, 861, 152, 846, 920, 224, 3097, 706, 2549, 2524, 326, 1013, 83, 569, 2764, 608, 2501, 2676, 751], "5776": [1449, 1191, 1937, 1985, 861, 152, 1085, 920, 224, 3097, 706, 1656, 2534, 1391, 2936, 2384, 608, 3044, 1548, 1147, 440], "4656": [2846, 3152, 2687, 2394, 2928, 813, 1949, 349, 920, 1144, 1761, 760, 1108, 3054, 803, 2362, 436, 1548, 502, 1481], "8187": [438, 2770, 3102, 771, 861, 2484, 2396, 920, 1144, 1761, 760, 139, 569, 1912, 1147, 1525, 2734], "5094": [1121, 221, 1636, 653, 2668, 861, 920, 224, 3097, 400, 1764, 257, 569, 2384, 2362, 1245, 2130], "8864": [89, 2770, 1798, 653, 2044, 653, 920, 224, 3097, 2767, 1656, 2549, 2524, 588, 257, 83, 569, 2362, 1796, 2501, 1213, 1028, 1147], "5756": [1521, 2005, 640, 1067, 653, 1225, 653, 920, 224, 3097, 329, 1876, 326, 2676, 1387], "7711": [2605, 2142, 1540, 2674, 861, 1594, 1649, 920, 224, 393, 2810, 1028, 1147, 2734, 2362], "1371": [2665, 1222, 1883, 3016, 861, 960, 3164, 920, 224, 3097, 2510, 2549, 2524, 2936, 83, 2384, 2501, 1147], "1858": [1948, 3152, 1081, 207, 846, 759, 846, 920, 224, 810, 464, 2737, 2936, 2153, 111, 928, 569, 2168, 635, 2384, 2424, 1530, 751], "4692": [2248, 1943, 2494, 2065, 888, 507, 976, 1034, 653, 2322, 1179, 770, 2928, 1497, 920, 1144, 1761, 760, 2549, 2524, 588, 1607, 257, 83, 569, 928, 1796, 2501, 1530, 1213, 1627, 2661], "8966": [1948, 1565, 794, 2928, 473, 3164, 920, 224, 810, 464, 588, 1607, 2737, 257, 928, 569, 1362, 1295, 390, 1796, 318, 2424, 1530, 2409, 1213, 2184, 2661], "1243": [1948, 1565, 885, 1979, 861, 1974, 846, 920, 224, 3097, 329, 635, 2661, 2384, 2936], "3395": [515, 3152, 1540, 861, 152, 48, 920, 224, 3097, 706, 1764, 1645, 318, 1245, 1295, 1525, 2184, 440], "8878": [1951, 2770, 1513, 2323, 2658, 2063, 920, 224, 3097, 706, 2549, 2524, 588, 1764, 257, 751, 83, 569, 1796, 2501, 1245, 2424, 2737, 1213, 1505], "4371": [2605, 2464, 591, 2317, 1354, 2323, 1427, 159, 2928, 808, 920, 1144, 1761, 760, 2115, 2534, 1391, 139, 569, 2168, 2384, 859, 2362, 1570, 1113, 1431, 2153, 1147, 440], "8101": [1133, 1222, 3077, 2768, 653, 2668, 2063, 920, 224, 3097, 1408, 2384, 2645, 2424, 802, 2737, 3044, 2734], "2236": [2846, 2918, 2121, 861, 44, 2063, 920, 1907, 1612, 2327, 635, 1548, 139, 821, 2645], "7435": [3068, 2465, 2223, 653, 1539, 2003, 2814, 119, 451, 957, 2990, 1847, 1691, 928, 1231, 797, 859, 1228, 584, 1548, 2728, 1505, 1656, 1606, 2362, 318, 598, 69, 568, 1945, 751, 1856, 381, 1062, 1211, 1276, 588, 3050, 635, 1447, 768, 3108, 980, 3019, 3057, 201, 2350, 3130, 2813, 2153, 2136, 486, 1876, 2960, 1912, 996, 99, 2480, 2475, 176, 2088, 946, 2184, 1745, 1195, 2061, 2241, 916, 704, 2228, 1420, 440, 1860, 675, 719, 2638, 2545, 1147, 1013, 1599, 853, 1570, 2645, 2676, 2506, 1075, 257, 1431, 1113, 2409, 1525, 139, 2983, 2001, 1764, 2039, 2574, 608, 3092, 3143, 2194, 1213, 326, 1628, 1895, 2265, 2285, 2912, 325, 929, 569, 162, 2764, 105, 1562, 841, 2660, 1342, 2962, 2168, 2643, 1796, 276, 2339, 1987, 966, 2502, 2359, 3112, 1762, 2631], "4839": [2846, 3152, 964, 912, 861, 152, 2282, 920, 224, 3097, 1889, 2549, 2524, 1195, 3057, 83, 3054, 2902, 2362, 2501, 436, 2424, 2737, 350, 1147, 2734, 1028], "3794": [1640, 619, 2223, 861, 213, 2282, 920, 224, 3097, 1889, 2362, 2645, 2424, 2737, 1548, 1028, 1147], "2173": [454, 2060, 3077, 861, 152, 653, 920, 224, 3097, 2510, 2549, 2524, 1387, 83, 139, 276, 2645, 2424, 2501, 2737, 768, 2734], "6430": [1234, 3152, 2323, 676, 861, 920, 224, 810, 1161, 1656, 257, 2936, 139, 569, 2384, 1912, 859, 1570, 276, 1525, 2130], "8384": [1550, 2005, 1937, 2323, 725, 846, 920, 224, 3097, 706, 1607, 588, 928, 569, 2384, 2362, 1796, 802, 1530, 1213], "4201": [2598, 2446, 2171, 653, 2243, 861, 920, 224, 810, 2204, 2728, 1525, 2912], "2225": [1550, 1191, 29, 861, 2484, 846, 920, 224, 3097, 706, 139, 569, 802, 608, 1387], "2743": [1948, 3152, 2975, 653, 1539, 2330, 2814, 119, 1644, 2208, 1656, 1387, 139, 608, 2724, 276, 2424, 768, 2737, 2734], "2529": [515, 221, 51, 3109, 861, 800, 503, 846, 1754, 920, 1907, 1612, 2327, 2549, 2524, 1387, 2962, 83, 2168, 139, 859, 1570, 1608, 2501, 2153, 2409, 1147, 2661], "7408": [2347, 3152, 1036, 846, 1881, 757, 920, 224, 3097, 1025, 2549, 2524, 2936, 83, 569, 2384, 859, 1570, 2501, 802, 768, 3044], "6010": [1948, 3152, 2121, 653, 1569, 846, 920, 1907, 1612, 2327, 1606, 1895, 3032, 3054, 2656, 436, 2238, 2178], "4485": [2605, 307, 1053, 2928, 131, 1649, 920, 224, 3097, 706, 2534, 257, 1387, 2384, 1147, 2631, 440], "5000": [89, 1079, 640, 2615, 653, 2668, 846, 920, 224, 3097, 706, 2990, 1108, 1387, 3054, 1231, 803, 436, 2645, 1113, 502, 3057], "8969": [308, 3152, 2307, 2994, 861, 231, 1649, 920, 224, 3097, 1989, 588, 257, 569, 608, 1796, 2645, 1213, 440], "8820": [2347, 221, 3084, 95, 2928, 920, 224, 3097, 1328, 704, 855, 2645, 1431, 1387], "783": [2248, 684, 964, 1286, 2928, 2012, 1085, 920, 224, 810, 464, 1656, 2696, 1108, 1606, 1581, 3054, 2168, 803, 2643, 276, 436, 2153, 502, 440], "5957": [438, 2770, 995, 2597, 653, 2668, 3164, 920, 224, 3097, 706, 1656, 2384, 2645, 768, 3044, 2677], "2353": [1521, 1222, 42, 861, 2611, 757, 920, 224, 3097, 2642, 440, 569, 946, 1147], "9313": [2347, 2464, 1053, 653, 1569, 3164, 920, 224, 3097, 27, 588, 257, 139, 859, 1796, 1570, 1213, 1147], "4263": [1550, 1079, 1242, 2712, 653, 145, 48, 920, 224, 810, 3142, 2549, 2524, 1108, 635, 83, 2168, 2061, 3054, 803, 2501, 2645, 436, 2153, 502], "1829": [1121, 911, 2346, 861, 2611, 1174, 2814, 119, 451, 957, 2709, 2912, 2015, 928, 569, 855, 1599, 608, 704, 1584, 1839, 1431, 2153, 2228, 176, 3088, 1525, 1505], "6741": [1554, 433, 2346, 25, 861, 2611, 3164, 920, 224, 810, 2204, 1195, 1764, 2912, 569, 608, 276, 1245, 2424, 318, 2737, 1525, 2184], "942": [1133, 1417, 1902, 1310, 861, 2611, 2928, 920, 224, 3097, 706, 1387, 139, 928, 569, 318, 276, 802, 1509, 2184], "4469": [1051, 226, 2223, 2323, 2070, 757, 920, 224, 3097, 1889, 1656, 2737, 2168, 2384, 276, 2424, 2153, 440], "46": [2248, 1417, 2334, 846, 1122, 2003, 2814, 119, 451, 2568, 1656, 1801, 894, 1109, 806, 2411, 2599, 2677, 1525, 1505], "6662": [2248, 1079, 29, 861, 152, 3164, 920, 224, 3097, 706, 2578, 569, 2645, 2424, 2737, 1147], "6869": [2665, 509, 1828, 846, 1029, 1174, 2814, 119, 451, 124, 1607, 588, 1764, 257, 928, 569, 1796, 318, 1245, 3044, 1530, 1213, 2184], "4402": [1550, 2060, 2786, 48, 562, 1649, 920, 224, 810, 1102, 1656, 1764, 2479, 569, 1762, 1245, 3044, 821, 1147, 440], "2895": [2248, 1417, 2256, 13, 3133, 2928, 2518, 653, 920, 1144, 1761, 760, 2424, 2168, 2645, 2737, 2153], "7681": [2069, 1713, 964, 861, 152, 3164, 920, 224, 3097, 706], "6409": [454, 1222, 1254, 2114, 653, 1093, 2003, 920, 224, 810, 1108, 2479, 139, 3054, 803, 1762, 276, 436, 802, 2424, 2737, 768, 502], "8199": [2248, 509, 122, 653, 2243, 3164, 920, 224, 810, 3142, 2549, 2524, 1108, 2479, 635, 83, 3054, 569, 803, 1762, 2501, 436, 802, 502, 763], "5982": [1449, 2464, 964, 861, 152, 48, 920, 224, 3097, 1889, 588, 257, 635, 1559, 1796, 2424, 2737, 1213, 751], "1209": [308, 3152, 1081, 861, 468, 1649, 920, 224, 3097, 1997, 928, 1362, 2411, 1548, 1876, 2661, 1075, 569, 1912, 2356, 2480, 1431, 1070, 1278, 1525, 139, 83, 2061, 1470, 3136, 574, 2549, 2524, 2936, 2384, 2501, 2545, 2180], "3332": [1449, 911, 995, 2928, 131, 48, 920, 224, 3097, 706, 1387, 2724, 2362, 768, 2424, 2737, 1028], "7931": [515, 221, 964, 861, 152, 861, 920, 224, 3097, 706, 908, 2936, 569, 2384, 276, 763], "8689": [1640, 3152, 1622, 2521, 3084, 2444, 846, 920, 224, 3097, 329, 2990, 1656, 1387, 928, 569, 1231, 139, 859, 2362, 2168, 2384, 1570, 318, 802, 1113, 608, 2153, 2184], "8330": [2554, 2465, 897, 653, 856, 861, 920, 224, 3097, 1025, 2709, 395, 635, 859, 3161, 1570, 2424, 2737], "1245": [2598, 166, 1798, 2928, 1659, 2063, 920, 224, 3097, 400, 635], "2035": [1133, 2060, 2307, 861, 231, 846, 920, 224, 3097, 2445, 1968, 2734, 1829, 3061, 2962, 569, 1608, 2424, 768, 2737, 2409, 1505], "6173": [2846, 2060, 2192, 861, 2484, 861, 920, 1907, 2185, 1043, 2728, 1525, 822], "2366": [89, 2465, 1739, 653, 2243, 757, 920, 224, 810, 1369, 588, 257, 2936, 569, 2384, 608, 1796, 276, 2424, 2737, 3108, 1213], "8220": [515, 168, 1131, 2928, 2351, 2928, 920, 224, 3097, 2510, 1108, 1606, 3054, 569, 2168, 803, 436, 2153, 502, 763], "6972": [1550, 509, 1050, 861, 1564, 48, 920, 1907, 2185, 384, 569, 2384], "5951": [1948, 3152, 2354, 56, 2323, 1504, 861, 920, 224, 3097, 400, 569], "8026": [2605, 1222, 2453, 861, 1974, 846, 920, 224, 3097, 329, 2549, 2524, 2936, 635, 83, 2384, 2501, 2677, 751], "4924": [1951, 1463, 349, 2928, 920, 224, 3097, 2510, 2549, 2524, 2737, 83, 569, 2168, 2501, 2645, 2424, 2153, 763, 751], "2301": [1234, 3152, 2801, 653, 1093, 3045, 2814, 119, 451, 1718, 588, 257, 635, 1796, 276, 2424, 2737, 1213, 751], "7066": [515, 221, 9, 846, 759, 2928, 920, 224, 810, 3142, 139, 69, 1113, 929], "5157": [3048, 1943, 60, 653, 2044, 1085, 920, 224, 810, 464, 2549, 2524, 635, 83, 2501, 2424, 768, 2737], "8841": [1550, 421, 1830, 861, 213, 1047, 920, 224, 3097, 1001, 326, 569, 1525, 2676], "5674": [1951, 1143, 586, 1060, 653, 287, 846, 2832, 920, 1907, 1612, 2327, 2645], "4470": [1133, 166, 2778, 1463, 653, 2103, 861, 920, 224, 3097, 329, 2062, 1147], "588": [454, 166, 364, 861, 213, 3164, 920, 224, 3097, 400, 635, 2384, 2936], "3207": [308, 3152, 1540, 861, 621, 2063, 920, 224, 810, 3142, 2549, 2524, 1108, 83, 3054, 803, 2362, 276, 436, 2501, 2645, 2737, 2424, 502, 2677, 1028], "2536": [1951, 3152, 1540, 861, 152, 48, 920, 224, 3097, 706, 2534, 257, 2936, 569, 2384, 608, 577, 1147, 2130, 440], "8805": [2554, 619, 964, 2048, 861, 621, 2282, 920, 224, 3097, 706, 257, 2912, 139, 2168, 859, 2362, 1570, 276, 2153, 1525, 2130], "2361": [1640, 1535, 1540, 1894, 861, 2611, 2282, 920, 224, 3097, 400, 2549, 2524, 2936, 2479, 83, 2384, 1762, 2501, 1028, 1147], "310": [515, 1943, 1830, 846, 759, 2063, 920, 224, 810, 464, 2534, 440, 608, 2362], "6501": [1726, 509, 305, 861, 2484, 2323, 920, 224, 3097, 2510, 2549, 2524, 1387, 83, 2724, 276, 2501, 1113, 3143, 2265, 2285], "6075": [1726, 476, 3077, 1999, 2928, 2485, 1047, 920, 224, 3097, 706, 2645, 1525, 2912], "3605": [1951, 165, 3047, 1725, 2928, 1605, 1488, 653, 279, 920, 1907, 1612, 2327, 588, 1607, 928, 569, 1796, 768, 1530, 1213, 763], "7541": [515, 3152, 60, 861, 2484, 3164, 920, 224, 810, 464, 1548, 1113], "8033": [1550, 911, 1381, 2024, 846, 2639, 846, 920, 1144, 1761, 760, 1108, 1431, 569, 2384, 2936], "6247": [3048, 476, 2481, 861, 2433, 2282, 920, 1907, 1612, 2327, 2962, 139, 1608, 2384, 2936], "2911": [1951, 3152, 3102, 423, 861, 152, 846, 920, 224, 3097, 1025, 588, 257, 2936, 1013, 635, 2384, 2764, 1796, 2424, 2737, 1213, 751], "206": [2665, 1191, 2831, 3016, 861, 2484, 861, 920, 224, 3097, 1291, 1108, 3054, 803, 828, 859, 3014, 1570, 436, 2645, 502], "1809": [308, 3152, 2801, 861, 2611, 1777, 920, 224, 810, 394, 569, 1362, 390, 318, 2645, 3044, 2424, 2737, 2409, 821, 2184, 2661], "7327": [89, 2464, 964, 1412, 653, 1304, 48, 920, 224, 810, 2201, 588, 257, 2960, 2912, 1147, 1796, 2645, 1213, 3019, 1525, 751], "3574": [2069, 378, 964, 861, 152, 1649, 920, 224, 3097, 1889, 588, 257, 1606, 929, 2912, 928, 855, 2039, 883, 704, 2409, 1796, 1945, 1431, 276, 768, 1548, 1213, 69, 1525, 2233], "5520": [1234, 3152, 1540, 2048, 1047, 3072, 757, 920, 224, 3097, 706, 588, 1195, 1764, 257, 2912, 2015, 1013, 928, 569, 2764, 1796, 1839, 1245, 2424, 276, 2737, 1213, 1525, 751], "7680": [2858, 2060, 1367, 861, 1621, 48, 920, 224, 3097, 1025, 1607, 2549, 2524, 2737, 840, 928, 569, 83, 276, 2501, 2424, 3044, 1530, 1147], "4450": [1951, 2770, 1636, 2018, 2323, 1963, 3084, 920, 224, 810, 2204, 1656, 2534, 1108, 1387, 139, 3054, 569, 2384, 803, 608, 2645, 2914, 436, 2409, 502], "4465": [670, 166, 2984, 653, 54, 2282, 920, 224, 810, 2964, 1656, 139], "8984": [2598, 911, 1053, 861, 213, 3164, 920, 224, 810, 1102, 588, 257, 929, 1796, 276, 1213, 69], "5613": [1640, 619, 1540, 1855, 653, 54, 757, 920, 224, 3097, 1889, 326, 928, 2737, 1530, 2153, 2676, 1028, 486, 1876, 569, 2362, 3044, 2424, 2409, 69, 1607, 83, 2168, 276, 2549, 2524, 2502, 2501, 2734], "7520": [2598, 294, 2927, 1445, 2323, 2282, 920, 224, 3097, 1889, 276, 2645, 2724, 1387], "5883": [1051, 911, 640, 653, 2243, 2063, 920, 224, 3097, 706, 2549, 2524, 83, 2420, 2362, 2501, 1548, 1028, 1147, 2734], "2926": [438, 684, 1238, 2928, 2485, 3164, 920, 1144, 1761, 760, 2549, 2206, 2534, 2524, 2912, 635, 83, 569, 2384, 2362, 2501, 821, 2914, 2409, 2728, 1525, 751, 2661], "6576": [2605, 2770, 2223, 653, 2668, 2063, 920, 224, 2867, 2549, 2524, 139, 83, 2501, 802, 2645, 276, 1548], "3497": [1726, 911, 846, 673, 861, 920, 224, 3097, 2510, 588, 257, 139, 569, 1796, 802, 1213, 2130], "2300": [1234, 3152, 58, 2928, 131, 1777, 920, 224, 3097, 706, 2912, 853, 859, 1570, 276, 2424, 2737, 1525], "2147": [1449, 2465, 593, 861, 2611, 48, 920, 224, 810, 3142, 2549, 1968, 2524, 1764, 2936, 3061, 83, 569, 2384, 2501, 1245, 2424, 2737, 1505], "2919": [515, 294, 3018, 861, 2611, 2003, 920, 224, 3097, 1889, 588, 2549, 1195, 2524, 1156, 257, 83, 569, 2362, 1796, 276, 2501, 768, 1213, 1689], "1461": [2352, 684, 2666, 861, 2484, 2323, 920, 224, 2798, 2064, 1108, 3054, 803, 436, 2645, 502, 751, 440], "7361": [1951, 3152, 2354, 2654, 861, 231, 846, 920, 224, 3097, 2009, 1656, 2638, 3130, 1342], "5199": [1234, 3152, 630, 653, 2668, 653, 920, 224, 3097, 706, 3057, 1147, 1945], "5371": [2858, 2446, 1937, 772, 2928, 131, 1085, 920, 224, 810, 553, 588, 1764, 929, 2912, 635, 569, 704, 1796, 1245, 2424, 768, 2737, 1213, 69, 1525, 1876], "3749": [2665, 509, 2334, 48, 562, 2919, 920, 224, 810, 1102, 1548, 2711, 1195, 853], "4503": [670, 2770, 1775, 653, 210, 2928, 920, 224, 2798, 606, 1656, 2534, 2168, 2384, 2153], "3703": [1951, 3152, 2801, 559, 861, 2484, 2282, 920, 224, 3097, 2767, 2734, 1570, 2384, 859, 2936], "285": [3040, 619, 1602, 861, 152, 846, 920, 224, 810, 2204, 2549, 2524, 2936, 83, 2384, 2501], "1045": [1550, 2060, 2801, 846, 1203, 3023, 920, 224, 2867, 1656, 588, 966, 1013, 569, 2362, 1796, 1213, 1147, 440], "2418": [1951, 2770, 2548, 450, 2323, 725, 2928, 920, 224, 3097, 1291, 588, 257, 1387, 569, 2168, 1796, 2645, 2153, 1213, 440], "1922": [839, 2918, 1902, 2887, 861, 213, 757, 920, 224, 3097, 2333, 1108, 928, 1147, 2737, 1530, 1028, 1075, 2912, 2960, 3054, 569, 3044, 2424, 1525, 1607, 1387, 83, 2061, 803, 704, 276, 502, 1987, 2549, 2524, 2936, 635, 2384, 2501, 436, 768, 1295, 3019, 3057], "4830": [194, 2465, 1460, 3084, 144, 2928, 920, 224, 810, 553, 1108, 1387, 751, 1895, 3054, 803, 2656, 436, 2645, 502, 2178], "6999": [1951, 165, 1551, 861, 2433, 2928, 920, 224, 3097, 329, 2677, 821, 2362], "5237": [1521, 1222, 2346, 653, 2668, 1047, 920, 224, 810, 2201, 588, 1108, 257, 1387, 1895, 502, 3054, 569, 803, 2656, 1796, 436, 1213, 763, 2178], "4589": [308, 3152, 2300, 2928, 2738, 3023, 920, 224, 3097, 329, 2299, 821, 2424, 2645, 2737, 2336], "3681": [515, 1696, 653, 846, 920, 224, 3097, 400, 2502, 2912, 1013, 1525, 2764, 2424, 2737, 3057, 486, 1505], "2782": [89, 1535, 1540, 861, 213, 2919, 920, 224, 810, 1369, 2534, 1391, 3054, 2384, 569, 608, 2902, 436, 2914, 2677, 1147, 440], "8470": [438, 378, 472, 861, 1955, 2063, 920, 224, 810, 1102, 139, 569, 2362], "2640": [515, 1696, 29, 846, 1881, 1649, 920, 224, 3097, 706, 2549, 2524, 2912, 83, 2501, 2645, 2424, 2737, 1525], "3125": [1199, 2060, 2223, 861, 213, 2003, 920, 224, 810, 18, 1108, 2737, 139, 3054, 569, 1912, 2168, 1856, 803, 276, 436, 2424, 2153, 502, 1525, 763], "2542": [1951, 165, 1301, 2323, 1848, 2063, 920, 224, 810, 464, 635, 569, 2645, 608, 1387], "3809": [2554, 1670, 628, 1445, 861, 1594, 2919, 920, 224, 3097, 2642, 1607, 1993, 928, 569, 2384, 1530, 946, 2335], "1110": [2665, 1417, 2346, 2928, 497, 1085, 920, 224, 3097, 706, 588, 1075, 257, 2936, 2061, 2384, 2362, 1796, 768, 1213, 1028, 946, 3057], "3985": [438, 1713, 628, 653, 2243, 757, 920, 224, 3097, 706, 1656, 139, 1147, 440], "8396": [1121, 1535, 1053, 846, 2987, 48, 920, 224, 3097, 400, 635, 139, 569, 2384, 584, 1228, 3044, 2335, 440], "2314": [1521, 421, 1047, 555, 1649, 920, 224, 3097, 706, 2990, 928, 1231, 2790, 1530, 257, 569, 460, 2599, 1113, 1525, 2385, 1607, 2709, 2660, 1342, 139, 1796, 276, 465, 588, 2638, 1213, 1147], "5746": [3040, 2446, 2281, 861, 213, 757, 920, 224, 810, 2964, 1607, 2960, 928, 569, 1228, 584, 3051, 276, 2914, 3044, 1530, 3019, 1525], "5360": [2248, 221, 2292, 1060, 2323, 2610, 2928, 920, 224, 3097, 329, 2677, 569, 2034, 763], "4044": [3040, 2864, 3042, 861, 2484, 2063, 920, 224, 3097, 2510, 276, 2645, 751], "7853": [1521, 3152, 1828, 3167, 2928, 131, 757, 920, 224, 3097, 1997, 853, 2645, 2737, 1548, 1028, 257, 2362, 318, 1431, 2424, 2184, 83, 855, 704, 1796, 276, 588, 2549, 966, 2524, 2936, 2384, 2501, 768, 1213, 1147, 3057], "664": [2605, 1079, 334, 2597, 653, 1225, 1649, 920, 224, 3097, 1997, 1764, 855, 3054, 2902, 569, 704, 1245, 436, 2442, 3044, 1431], "3006": [1521, 1222, 2927, 991, 1047, 1527, 1649, 920, 224, 3097, 2767, 2549, 2524, 83, 569, 2501, 2645, 276, 1548, 763, 751], "5314": [2248, 2060, 2307, 861, 187, 1649, 920, 224, 3097, 2510, 1656, 1764, 717, 569, 2735, 318, 821, 1245, 2424, 2737, 2184], "9285": [438, 1222, 542, 861, 152, 1085, 920, 224, 810, 464, 696, 1228, 3014, 2664, 2136, 1552, 869, 1656, 1606, 2960, 929, 1425, 2274, 569, 1912, 2362, 1431, 1070, 1113, 1562, 69, 1525, 751, 2732, 2061, 704, 1420, 440, 345, 635, 2384, 3117, 608, 3088, 3019, 3057], "1364": [2598, 1417, 640, 846, 673, 2063, 920, 224, 3097, 2510, 1801, 1195, 86, 1156, 2660, 806, 635, 569, 2168, 2362, 1295, 276, 821, 2153, 598, 1689, 2631, 1505], "8867": [2605, 2918, 2256, 13, 403, 653, 181, 2707, 48, 2488, 920, 1144, 1761, 760, 2960, 928, 569, 3019, 1525, 3057], "398": [2846, 2060, 2223, 653, 1499, 757, 920, 224, 810, 394, 139, 276, 2645, 440], "4426": [670, 307, 2896, 861, 152, 48, 920, 224, 810, 2964, 1147], "5095": [438, 3152, 2223, 2722, 861, 425, 3023, 920, 224, 3097, 1889, 1391, 2936, 635, 2384, 350, 1147, 3057, 440], "4670": [1951, 3152, 2223, 557, 2928, 2012, 3164, 920, 224, 810, 394, 1195, 2737, 635, 2168, 318, 2424, 2153, 2184, 3057], "5727": [839, 1417, 2820, 2257, 653, 1225, 3084, 920, 224, 393, 2810, 588, 1213, 1796, 276, 257], "8795": [2069, 509, 2334, 653, 1304, 757, 920, 224, 810, 2204, 2479, 1124, 928, 1699, 2362, 1762, 2424, 2737], "2497": [454, 221, 580, 653, 1304, 653, 920, 224, 3097, 706, 1656, 588, 257, 569, 2362, 1796, 2424, 2737, 1213], "8273": [2665, 433, 1538, 861, 1237, 757, 920, 224, 3097, 2333, 1656, 2524, 2549, 2936, 83, 2384, 2501, 2645, 2661], "7930": [670, 294, 29, 1047, 3127, 3164, 920, 224, 3097, 706, 1968, 3061, 569, 1362, 2424, 2737, 390], "6805": [2069, 2918, 2801, 846, 3103, 1085, 920, 224, 3097, 706, 2549, 2524, 2023, 83, 3054, 2902, 2409, 276, 2501, 436, 1548, 2661], "2718": [1133, 2770, 516, 1979, 653, 1275, 48, 920, 1907, 1612, 2327, 139, 821, 768, 3044, 2409, 2661], "3111": [438, 1535, 2024, 1047, 2690, 653, 920, 224, 2798, 2064, 1156, 635, 3161, 276, 2645, 1689], "734": [1051, 1079, 143, 653, 2668, 2063, 920, 224, 3097, 400, 1013, 751, 2764, 276, 2645, 2424, 2737, 1505], "126": [1234, 3152, 1540, 3052, 653, 2243, 1649, 920, 224, 810, 918, 1108, 569, 3054, 859, 803, 1570, 436, 1113, 502], "3902": [2846, 2918, 51, 263, 3109, 861, 960, 1339, 1085, 920, 1907, 1612, 2327, 2534, 2960, 569, 3019, 1525, 440], "6185": [2248, 1191, 591, 2317, 1725, 861, 960, 3028, 3164, 2143, 920, 1144, 1761, 760, 2549, 2524, 83, 2501, 2424, 2737, 2734], "8960": [1521, 3152, 1081, 861, 2484, 1777, 920, 224, 3097, 400, 2549, 2524, 588, 257, 2479, 83, 569, 608, 2362, 1762, 1796, 2501, 1213, 1028, 2734], "3522": [2846, 2464, 1254, 653, 1499, 846, 920, 224, 810, 2234, 1691, 859, 1570, 2645, 2153, 2737, 1481, 1656, 569, 2456, 2362, 318, 2424, 1525, 1710, 2184, 2130, 2534, 1387, 527, 2168, 704, 276, 763, 440, 395, 2384, 608, 1147], "6851": [3048, 2464, 334, 2323, 2658, 846, 920, 224, 3097, 400, 2350, 1108, 1013, 859, 1570, 2737, 569, 3054, 1912, 2764, 802, 2424, 1525, 1745, 139, 83, 803, 502, 440, 2549, 2524, 3092, 2501, 436], "4167": [1199, 1191, 217, 653, 600, 2282, 920, 224, 2867, 2920, 2015, 569, 2362, 1839, 1211, 69, 2854], "7135": [2598, 2464, 5, 847, 2190, 507, 958, 820, 653, 181, 1138, 375, 2928, 158, 1871, 65, 920, 1144, 1761, 760, 1656, 3143, 1113, 2285, 2265], "5587": [2554, 378, 1937, 2928, 473, 356, 920, 224, 3097, 706, 1607, 635, 928, 569, 608, 1530], "3628": [1948, 421, 2984, 2105, 2928, 1616, 2063, 920, 224, 810, 3142, 1656, 1764, 2709, 569, 1245, 1295], "1604": [1550, 1191, 2909, 349, 48, 920, 224, 3097, 329, 2502, 2168, 569, 318, 2153, 2335, 486, 2184, 2734], "6090": [1726, 2446, 999, 861, 2611, 1085, 920, 224, 3097, 706, 588, 1662, 257, 1342, 928, 2362, 1295, 1796, 276, 2638, 2424, 2737, 1213, 2677], "3711": [1234, 3152, 3101, 861, 213, 2282, 920, 224, 3097, 2642, 928, 1530, 3057, 486, 1876, 257, 2960, 569, 2362, 3044, 69, 1607, 139, 1796, 588, 2502, 2936, 2384, 768, 1213, 3019, 2734], "778": [1051, 1079, 2323, 1426, 48, 920, 224, 3097, 329, 1895, 1013, 2936, 635, 569, 3054, 2764, 2384, 436, 2424, 2737, 3057, 1481, 2178], "7720": [1951, 421, 2652, 861, 1955, 3062, 2814, 119, 1644, 1850, 2549, 2524, 83, 1362, 2501, 2645, 763, 390], "2731": [308, 3152, 653, 1225, 757, 920, 224, 3097, 2767, 2661, 2936], "9380": [1726, 619, 979, 2928, 1659, 2063, 920, 224, 810, 464, 704, 2914, 569, 257], "198": [1951, 2770, 349, 861, 920, 224, 810, 3142, 1342, 1895, 3054, 1856, 2656, 2362, 2638, 276, 436, 768, 1147, 1525, 2178, 440], "5690": [2858, 1417, 2801, 861, 213, 861, 920, 224, 810, 2204, 1656, 1968, 2549, 2524, 2479, 635, 3061, 83, 1762, 2501, 2645, 2424, 2737], "2808": [2846, 2446, 2583, 403, 653, 1312, 1649, 1888, 920, 1907, 2302, 896, 2732, 1260, 2912, 1895, 1387, 2962, 635, 3054, 2384, 2656, 1608, 2645, 276, 3004, 821, 436, 1525, 2178], "3682": [839, 1222, 51, 263, 1354, 861, 800, 1347, 2928, 2043, 920, 1907, 1612, 2327, 395, 2168, 3161, 318, 2645, 1113, 2424, 2153, 2184], "8034": [839, 2060, 1937, 861, 2484, 757, 920, 224, 3097, 400, 2409, 3051, 608, 2661], "3654": [1521, 1079, 2481, 861, 1649, 920, 1907, 1612, 2327, 1387, 2478, 2424, 768, 2737, 1295, 2677, 946, 3057], "3540": [839, 2060, 1538, 1047, 2236, 846, 920, 224, 810, 553, 588, 257, 3054, 569, 2902, 2362, 1796, 2645, 802, 2424, 2737, 436, 1213, 763, 751], "772": [1051, 1417, 1540, 861, 213, 2928, 920, 224, 810, 2204, 2677, 3054, 436], "610": [1640, 3152, 2786, 653, 2668, 861, 920, 224, 810, 464, 588, 257, 2936, 928, 139, 2384, 1796, 318, 1732, 1213, 2184], "5654": [2347, 166, 964, 2928, 1659, 1649, 920, 224, 3097, 1997, 1195, 257, 1342, 2936, 139, 2384, 2362, 2638, 2335, 2130, 440], "999": [2069, 2864, 498, 3133, 1047, 2915, 48, 920, 1907, 1612, 2327, 1993, 635, 527, 928, 569, 2384, 1732, 1530], "2293": [3040, 2770, 2346, 2928, 1126, 2282, 920, 224, 810, 1102, 1764, 1013, 569, 2764, 2362, 276, 1245, 768, 318, 1028, 2184], "5145": [1726, 221, 955, 861, 425, 266, 2814, 119, 1644, 2208, 1656, 2677, 276, 2384, 2936], "4565": [2858, 1417, 2334, 653, 1304, 1649, 920, 224, 3097, 706, 588, 1213, 1796, 276, 1147], "7255": [515, 2142, 591, 2401, 1725, 861, 800, 2323, 2705, 920, 1907, 1612, 2327, 326, 1195, 139, 859, 2362, 828, 1570, 2676], "2582": [2069, 2770, 593, 861, 152, 861, 920, 224, 3097, 706, 569, 2384, 608, 821, 2645, 2677, 1147, 440], "3492": [2352, 1079, 2928, 2485, 1085, 920, 224, 3097, 1291, 1391, 2936, 2962, 2384, 1608, 2645, 2424, 2914, 2737, 768, 1147, 440], "1897": [1449, 2464, 964, 100, 653, 1403, 653, 920, 224, 3097, 706, 588, 257, 928, 569, 608, 704, 1796, 276, 1213], "7405": [454, 2465, 1081, 2928, 80, 2063, 920, 224, 3097, 400, 2549, 2524, 588, 257, 83, 1796, 2501, 2645, 2424, 2737, 1213, 751], "7638": [1199, 619, 1540, 2323, 2766, 1649, 920, 224, 3097, 706,
[truncated: 767,905 more chars]
