# Supplementary material
Source: ML conference proceedings conference paper supplement (https://proceedings.neurips.cc/paper_files/paper/2022/hash/040c816286b3844fd78f2124eec75f2e-Abstract.html)
Supplement: Supplementary file 1 [file 040c816286b3844fd78f2124eec75f2e-Supplemental-Conference.zip › DSSL/DSSL/data/twitch/DE/musae_DE_target.csv]

id	days	mature	views	partner	new_id
37905227	2149	True	162078	False	5079
63102384	1574	True	1370	False	4281
109414094	1034	True	6043	False	992
84163849	1319	True	94298	True	9021
38240837	2137	True	2323	False	330
75568017	1411	True	807	False	2833
38019892	2145	False	43650	False	5069
101004172	1137	False	27815	False	7798
212738936	187	True	2356	False	5109
36580131	2196	True	8723	False	410
110456538	1020	False	1907	False	6812
36206624	2213	False	1635	False	8219
79794063	1367	True	16344	False	2265
78873021	1377	True	24703	False	1520
141856928	659	True	1985	False	2422
110317582	1024	False	17344	False	4672
82594934	1337	True	47164	False	1821
41411015	2012	False	7186	False	7664
81214021	1352	True	4654	False	8566
32311281	2271	True	4156	False	1152
67976647	1532	False	3283	False	9140
113836316	971	True	1039	False	156
38922970	2111	False	3044020	True	6193
56018264	1676	False	1410	False	786
46371860	1909	False	20661	False	2905
30628039	2334	True	2685	False	9406
105175998	1053	False	247	False	3997
11544057	3113	False	4909	False	7661
77197496	1398	True	603987	True	7091
126366875	855	True	1679	False	6350
45269637	1933	False	2557429	True	364
47329829	1870	False	21837	False	7295
65541964	1562	True	11770	False	3364
87334627	1286	False	3311	False	4456
61893349	1626	True	182875	True	6200
22760096	2684	True	5489	False	1543
48040541	1875	False	79676	False	1512
80486801	1360	True	9102	False	4846
120056949	926	True	10539	False	7776
94456184	1205	False	387	False	1388
47828062	1843	False	17034	False	1803
40214830	2070	True	50997	True	4788
21063961	2771	False	814883	False	5923
36550698	2200	True	9008	False	143
152585009	550	True	324	False	2775
68459472	1524	False	2444	False	5656
42567425	1988	False	2782	False	1019
42075445	2012	False	3447	False	764
28892026	2406	True	9707	False	3960
110651185	1016	False	5529	False	5644
174266671	364	True	2188	False	3635
79141806	1374	True	10000	False	3986
43995312	1960	True	2495	False	2430
95563292	1192	True	24659	False	2991
31649983	2294	False	14085	False	7095
121766409	908	False	626	False	299
182477479	294	False	2898	False	4999
172747892	395	False	10836	False	6448
110604320	1019	True	7253	False	4736
108282326	1044	True	6889	False	3631
153047400	543	True	4206	False	5830
62769300	1608	False	179574	True	6926
25001194	2576	False	31474	False	9002
83592002	1327	True	20343	False	466
123459985	891	True	3093	False	4295
111145234	1014	False	3172	False	9451
80546445	1359	True	26661	False	1533
72929915	1444	True	3110	False	2686
80181911	1359	True	1021	False	8616
109577723	1031	False	12562	False	876
63388314	1596	True	284253	True	3450
98400192	1161	True	20519	False	8166
25205727	2559	True	18084	False	4014
116190111	966	False	2718	False	833
126335595	848	False	805	False	8591
148308708	599	False	11199	False	2526
86979504	1292	False	1729	False	7550
57105416	1693	True	4044	False	4040
64224380	1580	True	3765	False	8931
171559279	412	True	6562	False	8293
93335185	1158	True	722	False	3380
102666832	1118	False	146	False	6673
30503729	2336	True	8560	False	7462
119028537	937	True	4646	False	8719
139959265	691	True	9984	False	5658
65681931	1558	True	2139	False	8534
141743566	670	True	3732	False	3155
128419384	829	True	330	False	8808
49725668	1835	True	1369	False	129
84603957	1315	False	3051546	True	8397
86135695	1296	True	8526	False	7808
74668105	1332	False	1748	False	2571
79587480	1312	True	198	False	5845
59304571	1658	True	2431	False	6134
66719758	1546	True	187959	False	2340
43317490	1983	False	8247	False	8350
129788369	807	False	4356	False	7434
44033728	1953	True	1788	False	5578
79998083	1365	True	9405	False	142
108474563	1046	True	8970	False	7098
96011211	1187	True	105010	False	546
158082443	503	False	4229	False	5397
86768469	1294	True	83231	False	2868
26633304	2501	False	153590	True	5231
126988211	796	True	204	False	6938
45866211	1893	False	1101	False	8000
30810149	2323	True	3365	False	7810
125568444	856	True	1006	False	834
85460035	1305	False	1514	False	624
57344436	1694	True	60927	False	248
30396809	2345	False	27544	False	2551
38696419	2119	False	10376	False	7890
83603076	1327	True	1632	False	6769
41606913	2028	False	1656	False	4474
132246031	788	True	11346	False	6072
93587658	1215	False	58132	True	1283
53936875	1741	True	5247	False	2548
80759665	1354	True	1930	False	1660
206288115	209	True	4879	False	7752
98907295	1158	False	27561	False	7696
40151573	2071	False	25644	False	6076
151813300	555	False	436	False	1190
78058263	1385	True	15057	False	7358
79970021	1365	False	193335	False	9320
71852631	1479	True	3643410	True	4957
99161442	1156	True	49652	False	3097
48078259	1875	False	18742	False	7304
184205493	311	True	1952	False	105
70314858	1503	True	18222	False	6276
166933807	434	False	3289	False	7786
99754753	1148	True	219120	False	5043
137026647	727	True	10901	False	4084
124878836	839	False	621	False	9492
42286487	2012	True	5380	False	4854
95830875	1189	True	11586	False	2912
159974091	487	True	23183	False	404
74553003	1430	False	19016	False	3279
97485848	1172	True	17605	False	8053
45382843	1931	False	5547	False	8971
38954336	2055	True	1624	False	5374
39132273	2104	False	22628	False	4098
123777847	880	False	2343	False	7478
49381844	1845	True	1610055	True	269
93491517	1212	True	12765	False	2507
55464534	1719	True	7203	False	2661
26764594	2494	False	6032	False	5347
125487719	865	True	2772	False	1518
146414440	613	False	956	False	3954
79971571	1365	True	29730	False	727
108531343	1035	True	867	False	2126
137305494	724	True	2182	False	4264
86770143	1293	True	114010	False	3496
37528496	2164	False	8989101	True	5145
118338806	933	True	916	False	7754
80640952	1326	True	2817	False	8802
116803798	962	False	20297	False	1288
158250757	484	True	1616	False	8058
141787445	669	False	2554	False	170
27881906	2446	True	29640	False	7228
41298068	2037	False	1111	False	7508
141841350	669	True	2876	False	2862
94467414	1205	True	12043	False	7804
32416102	2269	True	14807	False	4820
94822512	1200	True	2016	False	9260
97600154	1170	True	9319	False	378
124560999	877	False	1631	False	5525
79576667	1368	True	9388	False	7388
25717656	2543	True	55217	False	6309
6397357	3433	True	21254	False	4279
98995130	1157	False	926	False	1703
77257968	1396	False	2672	False	4169
102424419	1115	True	11954	False	8905
42197126	2014	False	18708	False	4703
125245545	868	True	1460	False	3054
31997521	2284	True	15542	False	5855
96566850	1181	False	3463	False	9215
44759993	1946	True	8753527	True	8803
43874202	1962	False	302	False	8142
45215243	1934	True	6662	False	6698
51068376	1804	True	35519	False	9154
117478206	955	True	2432	False	2787
40705566	2047	False	9323	False	7061
122438735	899	False	6263	False	3743
27638012	2456	False	15140	False	8359
103700930	1104	True	38729	False	3846
79203575	1373	True	175433	True	1894
73493530	1452	True	12452	False	6392
96848269	1152	False	1014	False	1395
90736435	1251	True	68975	False	1050
28760989	2408	True	2854	False	5413
186707473	295	True	5219	False	6702
39950375	2078	False	34816	False	3487
38130423	2139	True	706	False	7249
49294698	1846	True	2000	False	6600
119660668	932	False	13510	False	4696
61790466	1626	False	1954	False	3610
20407432	2798	False	9642	False	5252
35861963	2119	True	3783	False	7876
87005226	1279	False	6283	False	3490
118359916	946	True	29509	False	1079
78786786	1378	True	18405	False	7116
95078376	1189	True	2107	False	1145
79173115	1374	True	2144	False	562
111904487	1010	True	3985	False	1007
170131237	421	False	4540	False	8669
115494256	974	True	2243	False	1969
86170707	1290	True	7432	False	6057
215426073	176	True	1173	False	5193
36601423	2200	True	2594	False	9225
81744666	1347	True	6561	False	2769
41535791	2030	True	127556	False	4880
48824001	1858	False	74796	False	9296
32618771	2256	False	277792	False	8371
91387787	1243	True	2385	False	1574
84124982	1315	True	3991	False	5351
39249165	2098	True	13205	False	5325
88903093	1273	True	40972	False	2006
59113962	1664	False	6671	False	280
87484364	1280	False	229	False	5727
61333007	1635	True	28509	False	687
65663206	1560	True	4547	False	7118
22892906	2680	False	4600630	True	5834
148070416	601	True	4175	False	4632
189386901	277	True	2505	False	2414
39675935	2082	False	3835	False	7093
144546996	638	False	107032	True	4136
172942080	398	True	8274	False	5953
117376654	956	False	6578	False	955
53059174	1766	True	8393	False	4383
49420207	1835	True	9879	False	3426
58881432	1670	True	40895	False	228
75531814	1423	True	376378	True	898
56180816	1683	False	6343	False	49
63626312	1592	True	38651	False	4076
96662505	1173	False	2932	False	7582
98334838	1164	True	18145	False	8268
161447168	453	True	3665	False	9016
119813821	929	False	2532	False	8018
51340116	1796	False	46211	False	5086
167464748	439	True	12448	False	2207
28734990	2412	True	24448	False	7917
146229409	622	False	2024	False	4564
29249070	2393	False	26881	False	2070
69320552	1516	True	265070	False	9402
72861756	1462	True	15795	False	1198
125409960	736	True	56	False	3858
114152235	988	False	61487	False	2777
174463137	388	True	1006	False	3558
54285200	1744	True	9320	False	2832
61645651	1630	False	36805	False	2886
83989330	1322	True	109629	False	2797
85978370	1282	False	260	False	6534
25112050	2572	False	40183	False	2848
40528880	2060	False	1399768	True	6366
35893764	2232	True	1236343	True	7275
47871711	1869	False	9779	False	8038
142112738	665	True	4654	False	8182
31813274	2293	False	8098	False	3414
91915956	1234	False	1924	False	978
39850472	2081	False	62524	False	2602
172778151	402	False	3852	False	2317
109400997	1034	True	28127	False	2844
111348157	1012	True	7694	False	1420
147549339	605	True	28101	False	6470
50553631	1815	True	3388	False	5060
120501876	915	True	2412	False	7978
41933531	2019	False	1752	False	3881
87237133	1289	True	1310	False	4917
136379940	720	True	777	False	9198
37105711	2181	True	1044023	True	7011
37048371	2182	False	57558	False	2363
149087567	591	True	5117	False	5363
42507986	2006	False	114072	False	4446
55898523	1715	False	10154651	True	7216
87376086	1288	True	12098	False	122
21345521	2757	False	100814	False	7751
136967542	729	True	1361	False	6391
60318806	1645	True	1496	False	3764
75262821	1427	False	9293	False	9038
83512222	1328	True	51118	False	6821
63285985	1598	True	3016	False	7558
61654657	1625	False	2683	False	946
41294461	2036	False	10592	False	3836
20700404	2786	False	45109	False	4171
69876365	1494	False	5943	False	8608
37418483	2149	False	77888	False	533
121831496	909	True	4375	False	45
60697823	1644	True	6743	False	6513
31151190	2305	True	3131	False	8972
65243442	1567	False	97389	False	8081
150613637	575	True	34660	False	747
69691150	1501	False	7846	False	5622
3015091	3590	True	2686	False	1488
148780478	594	True	8549	False	7869
37061636	2177	False	2073	False	3477
35682068	2240	True	3117	False	8068
86161832	1287	False	8859	False	8464
137369494	723	True	2168	False	3408
22850923	2653	False	430	False	6601
99589449	1151	False	1360	False	4222
124066416	883	False	14248	False	3827
141977650	667	True	5837	False	5790
101272840	1135	True	3211	False	2528
39369393	2084	False	3558	False	4647
69130013	1515	True	9308	False	3339
79488581	1358	False	1024	False	5508
134776444	756	True	12162	False	943
108256369	1048	True	800922	True	6162
63756207	1590	True	1055181	True	2059
60399497	1649	True	1180020	True	4547
126088079	857	True	11065	False	6120
195765996	244	False	7230	False	5602
141429728	674	False	2497	False	1732
64660284	1574	False	1522	False	5073
166357719	446	False	6516	False	471
119067219	938	True	29564	False	2659
67905418	1530	True	10237	False	5696
80684271	1358	True	10725	False	5306
84412496	1317	True	45468	False	1210
124869526	873	True	76799	False	3975
151548491	504	False	287	False	7320
43294270	1979	True	5286	False	4358
56128199	1710	True	5096	False	7086
132520095	784	True	20501	False	3557
142102783	650	False	536	False	2475
132534544	784	False	14609	False	4100
30611941	2339	True	7816	False	3750
30285154	2350	True	6477	False	4234
65185272	1568	True	25646	False	5460
29579879	2379	True	81630	False	3822
87674686	1285	True	40141	False	2218
171716968	410	True	8838	False	7190
147544655	604	True	21372	False	3805
113446171	995	True	7332	False	2134
148075169	599	False	1153	False	6950
188369379	284	True	664	False	1448
93020664	1222	True	16513	False	1721
39383053	2094	False	2776	False	6993
108879310	1029	True	7484	False	4294
134117963	760	True	1708	False	8569
64667143	1573	True	5465	False	7623
39809272	2082	False	8817	False	7128
173810833	396	True	2895	False	5257
32030299	2283	True	26932	False	2987
48245475	1871	True	814207	True	188
79478285	1356	False	27892	False	6288
107757378	1055	True	933	False	9375
182055861	323	True	762	False	7553
35087722	2245	True	7154	False	5380
38192763	2139	True	762	False	942
61789357	1625	False	1932	False	2995
103315059	1106	False	1282	False	4753
101573127	1130	True	5522	False	4913
81903176	1343	True	26503	False	9219
36426030	2207	False	2552	False	2499
37095546	2143	False	1187	False	1234
32423019	2258	True	1508	False	8918
120414196	925	False	948	False	9463
40258312	2068	True	34866	False	1593
94545939	1183	True	46524	False	7055
135193874	750	True	1945	False	5329
49387641	1845	True	218635	False	3535
63553992	1594	True	243526	False	262
79013911	1352	True	16837	False	5774
35647950	2241	True	5410	False	7692
31568336	2302	True	888	False	4730
72216869	1473	True	3488	False	7262
30880912	2328	False	4772	False	7689
97178884	1175	False	3323	False	3046
43327354	1983	True	11076	False	8993
40533087	2027	False	1721	False	6094
88710029	1273	True	50231	False	3971
47433601	1886	True	20204	False	1090
94439208	1205	False	6183	False	6203
109131615	1037	True	14362	False	1004
186943102	292	False	3755	False	945
175104094	383	False	1908	False	4678
124322456	880	True	15586	False	376
83953262	1321	True	15688	False	937
78532193	1379	False	2445	False	3225
84934915	1311	True	206753	True	144
36735468	2192	False	21116	False	1453
115018084	979	False	11280	False	1375
160553421	482	True	28692	False	3735
51870314	1770	False	10615	False	8590
82674131	1334	False	367	False	268
200111831	225	True	12979	False	8032
167659560	419	False	170	False	1186
85826896	1298	False	5965	False	4225
40863570	2051	True	143271	False	1064
36891444	2185	True	31305	False	6247
112551289	1004	True	235645	True	5389
62000480	1623	True	10243	False	4861
159653153	489	True	3868	False	4195
123791051	887	True	6958	False	5582
86411887	1296	True	3006248	True	9272
135123158	751	True	37555	False	2454
142591290	598	False	678	False	766
187924133	286	False	783	False	9278
95165752	1197	True	93460	False	6886
46644580	1883	False	8329	False	7039
146825092	616	True	2876	False	4545
77846347	1388	True	61733	False	1710
63979857	1547	False	848	False	187
70953347	1493	True	25878	False	1753
81243230	1352	True	140614	True	6435
102403029	1092	True	3767	False	1017
43018193	1991	True	5522	False	5730
160427319	483	True	29745	False	6572
135231751	744	True	3035	False	8365
55202259	1728	True	4720	False	6204
89308283	1261	False	1106	False	7323
59167024	1621	True	595	False	2500
32426110	2261	False	338	False	1238
51080933	1802	False	49113	False	6820
6394791	3432	True	27195	False	3792
126025499	859	True	7882	False	8625
28389129	2420	True	60270	False	6843
86876025	1292	True	4148	False	4540
198590268	228	True	11721	False	3899
133916322	766	False	1384	False	5559
120609069	924	True	3248330	True	3633
54868281	1734	True	12083	False	3370
76842640	1394	True	1782	False	956
131902632	791	True	2191	False	6478
62258096	1618	True	4729	False	6768
51353369	1791	False	684	False	3337
120394730	926	True	325351	False	2879
166947335	442	False	723	False	6068
47588274	1885	True	9159	False	5147
122192638	906	True	3470	False	434
27162795	2476	False	2119	False	8305
83759198	1325	True	594	False	2386
82938650	1326	False	216	False	380
130875790	804	True	12092	False	225
52339574	1777	True	2700	False	5107
37166455	2178	True	6136	False	4249
52024348	1783	False	992	False	2909
161784381	471	True	11540	False	4944
101941468	1127	True	61497	False	124
52519440	1764	False	8731	False	4919
63020380	1601	False	9623	False	4231
112332906	1006	True	8206	False	2394
117036606	956	True	3105	False	3219
152945046	550	False	16598	False	231
63084458	1602	True	3646	False	3422
179570737	349	True	196	False	1191
71708891	1481	False	28110	False	7112
76750934	1401	True	2144	False	4673
64065353	1573	False	2814	False	2226
42033450	2015	False	71121	False	4787
61339182	1635	False	2976342	True	7936
62006475	1615	True	59295	False	5286
61274186	1635	False	379	False	8244
62648244	1610	False	1203	False	6939
31635161	2295	True	2543	False	8033
124938410	868	False	6842	False	5857
57204519	1696	True	17923	False	4497
49697371	1836	True	15007	False	6714
216917948	138	False	838	False	5722
56994344	1697	True	1082	False	6086
53733185	1753	True	7820	False	6299
98741932	1160	False	7646	False	6790
82712888	1335	True	1797	False	3642
88642603	1272	True	1979	False	8361
88919514	1272	False	1172	False	879
55909903	1537	False	399	False	6796
70866900	1492	True	2501	False	3438
33396292	2251	True	1289315	True	3223
133183055	777	True	8552	False	7954
133369826	775	True	21702	False	2311
116224897	946	False	303	False	7719
31994237	2286	False	86815	True	7201
124586251	876	True	57294	False	1320
47120556	1894	True	25101	False	587
135564812	738	True	2751	False	2052
84101273	1318	True	3378	False	1250
121010079	909	False	588	False	8146
44760515	1945	True	70084	False	9137
93942652	1211	True	18543	False	7511
144101291	643	True	27179	False	2283
49829903	1833	False	3087	False	3470
81350079	1351	True	28201	False	2011
40699890	2056	True	6396	False	1153
21331888	2758	True	236962	True	9456
197659185	230	False	686	False	1918
105860422	1076	True	3202	False	1256
134136556	744	True	665	False	429
97591688	1171	True	2667	False	4842
139693345	694	True	47097	True	1920
18964255	2848	False	1726	False	8640
83221567	1279	True	2536	False	4070
60530933	1645	True	8624	False	6661
67023654	1542	False	2033	False	7454
145852822	624	True	9654	False	1399
83505919	1325	False	9742	False	7429
79217194	1371	False	1506	False	313
88995631	1272	False	2318	False	8083
60878041	1641	False	710	False	6508
106755753	1066	True	48669	False	1156
23238729	2658	True	2259	False	3507
45853037	1921	True	623631	True	5974
108794754	1041	True	11577	False	2820
79720584	1366	True	6264	False	7071
119387560	935	True	52897	False	7853
61152443	1638	True	949	False	4140
45062984	1938	False	6354	False	3933
46853156	1900	True	94712	False	6399
139904169	692	False	1436	False	679
144129974	640	True	4561	False	7182
84576703	1315	True	5195	False	1422
47681327	1883	True	2050455	True	2209
42845215	1996	True	14822	False	600
63444226	1595	True	9161	False	3044
180822921	339	False	2941	False	5066
75907334	1417	True	13487	False	146
81644416	1348	True	12841	False	1671
44172469	1960	False	288945	True	685
68742551	1523	True	8824	False	6624
55227703	1723	True	2419	False	5940
30686077	2318	False	5582	False	1162
46670729	1487	False	1529	False	3076
36602703	2186	True	658	False	474
73733793	1391	False	1552	False	3273
209129328	199	True	10025	False	2246
198136070	196	False	841	False	2478
38362650	2133	False	55377	False	4337
51766994	1789	True	748	False	5584
161010190	477	True	4101	False	6431
27591383	2457	True	310078	True	413
51393086	1795	False	74600	False	7312
47459511	1881	True	7294	False	6487
39611992	2083	True	204	False	6750
130435654	809	True	5471	False	1500
23497580	2614	False	1247	False	1655
42992853	1993	True	12893	False	2493
134993208	752	True	7792	False	3077
71443831	1485	True	2550221	True	5388
63478942	1581	True	3962	False	4124
138322753	712	True	36755	False	2825
43334060	1983	True	7670216	True	8468
40323122	2066	False	22812	False	1192
139372293	697	True	2813	False	5618
98334095	1164	True	29207	False	7838
111580290	1013	False	3231	False	2972
67520146	1536	False	101577	True	958
51731139	1779	True	3391	False	3870
157872109	499	False	1337	False	6973
124234075	868	True	779	False	8220
190369175	264	True	1941	False	1989
40007671	2045	True	3507	False	8196
108610961	1038	True	1942	False	7158
71768306	1481	True	50817	False	3603
53740478	1754	True	44411	False	538
114204206	987	True	70447	False	4350
97682598	1160	True	3840	False	677
121067925	917	False	4214	False	3684
82786149	1323	True	1453	False	8140
104074803	1098	False	1894	False	2075
148172279	600	True	12785	False	4627
38009892	2146	True	306905	True	5881
123866161	884	False	1371	False	1778
73946497	1445	True	91026	False	3116
65748992	1449	False	629	False	0
123523174	890	False	82927	True	4965
94907330	1200	True	57176	False	6337
122058234	908	True	8573	False	7904
68860701	1515	False	252	False	5002
67091059	1537	False	2988	False	7687
108813959	1033	True	1418	False	4404
27105087	2479	True	30734	False	3357
87889332	1283	True	20371	False	322
32944622	2253	False	2329	False	7267
56361669	1707	False	2105	False	401
136923376	684	True	1020	False	7847
81951208	1344	True	3842	False	8508
135785882	741	True	43483	False	6627
80787805	1355	True	3359	False	8413
152278619	557	False	708	False	8747
114854157	979	True	20453	False	1321
86114842	1285	False	2598	False	305
33808673	2245	True	1025	False	4784
143064695	653	True	9209	False	9250
180313355	296	False	682	False	4941
109699402	1030	True	48048	False	4804
97954232	1159	False	30060	False	6024
62379500	1617	True	19835	False	3174
92922555	1219	True	4035	False	5009
107497469	1058	False	218181	True	7264
87348912	1269	True	353	False	3282
181412158	333	False	546	False	4799
44211090	1939	False	27961	False	3974
180271954	342	True	4363	False	8737
194630640	248	True	774	False	2884
91343075	1243	True	7457	False	1297
124625559	876	True	5235	False	2262
82902684	1334	True	54524	False	9273
128860693	827	True	6011	False	1827
101390891	1134	False	5864	False	4178
55048545	1731	True	2712	False	8416
106276073	1071	True	130458	True	5304
54468233	1741	True	3777	False	4405
118315091	941	True	3646	False	2609
163575630	461	True	5609	False	8100
27868920	2436	True	11331	False	9331
120868862	922	True	5063	False	2332
87396674	1287	False	540	False	2510
59686978	1659	True	654	False	40
87709633	1281	True	49244	False	3432
44375813	1950	False	24775	False	4478
40346536	2065	True	80632	False	5141
186258657	299	True	1932	False	441
118432086	941	False	1947	False	4812
69578713	1513	True	117726	False	6960
185324980	306	True	2258	False	3144
98150047	1164	False	11120	False	5556
114852378	977	False	1028	False	452
124508708	878	True	17680	False	6848
65748612	1553	True	5636	False	6607
63966261	1586	True	5400	False	1781
87578614	1286	True	10545	False	3457
40182259	2071	True	778330	True	4899
78119805	1385	False	20378	False	501
117443135	955	True	6604	False	1497
79097410	1365	True	7005	False	6734
22851217	2653	False	490	False	6775
118212704	948	True	18761	False	1221
133821846	760	True	5572	False	7841
74817528	1433	True	181721	True	8493
146895747	615	True	20030	False	7516
42099806	2016	True	41103	False	5233
64180634	1584	True	63865	False	2560
99145517	1155	True	9078	False	3347
83046354	1320	True	9171	False	6956
72253609	1472	True	12910	False	98
31041008	2319	False	2389	False	5456
100089265	1148	True	2151	False	9124
79532581	1370	True	1606518	True	2636
138878213	688	True	782	False	4180
145996638	624	False	5186	False	7637
58203586	1683	True	11395	False	4289
62991918	1601	False	1392	False	3053
58951858	1666	True	408	False	1267
58249309	1672	False	1323	False	2385
63672396	1591	True	63574	False	2377
125177248	869	False	12535	False	1345
49709650	1815	True	4808	False	338
96567562	1181	True	10496	False	148
79955892	1350	False	6922	False	6731
41868255	1986	False	1156	False	8691
141486775	673	True	8502	False	8326
164490054	456	True	10599	False	6254
88975712	1266	False	2083	False	5964
152726981	520	False	45	False	6656
102397974	1121	True	20132	False	8213
56102381	1705	True	2498	False	2035
67442025	1538	True	10314	False	3100
101823025	1127	True	15461	False	6889
89472632	1266	False	43951	False	2631
73650027	1449	False	558939	True	6541
58826884	1670	False	4899	False	4701
71686212	1482	False	8967	False	3504
74042676	1442	True	19078	False	1933
119243928	936	True	5096	False	667
60406735	1648	False	6274	False	8812
116742704	949	False	1276	False	3788
104586384	1091	True	24273	False	4115
126179602	857	True	5603	False	3618
115935252	960	True	500	False	1174
84553379	1314	True	5163	False	3437
64786585	1572	True	4900	False	3252
52126810	1783	True	1877	False	5232
79911509	1366	True	5150	False	3810
73312957	1449	True	6980	False	6176
70200162	1505	True	9253	False	6271
53214766	1750	False	3441	False	7873
130433036	806	False	826	False	7387
139989998	690	True	7914	False	8138
155047947	512	False	196	False	2370
153918067	539	True	2121	False	3829
58349462	1651	False	371	False	1111
74340638	1440	True	15094	False	3624
85835646	1300	True	15503	False	4803
53405249	1760	True	5010	False	5506
42390962	2004	True	8674	False	3142
97113088	1163	False	1176	False	5563
144589964	638	True	8050	False	659
59805163	1658	False	24265	False	2033
100499604	1144	False	37055	False	85
66355107	1551	True	9199	False	9446
66501747	1549	True	146245	False	8924
47356230	1890	False	2149	False	3653
17071598	2909	True	18712	False	9168
126179956	857	True	8820	False	3830
105889970	829	False	685	False	2741
45685519	1915	True	8735	False	3903
140175788	688	False	3996	False	7927
61835419	1626	True	2163	False	1251
71692536	1482	True	9345	False	5435
149907998	580	False	1478	False	8968
126591405	848	False	752	False	4859
93917952	1211	True	33076	False	2755
41531124	2032	False	26020	False	1418
48384655	1868	True	2300	False	3815
39233521	2100	True	8240	False	5753
72988541	1460	False	14478	False	8125
23452464	2647	True	96837	False	3921
50874656	1808	False	12272	False	1333
54398856	1742	True	4585	False	4205
39041972	2106	True	9695	False	8799
44876358	1942	True	21603	False	1998
126251985	856	True	12233	False	7569
76891590	1403	True	11341	False	842
144757293	635	False	5465	False	6910
45803309	1921	False	41663	False	8538
135725497	691	True	785	False	253
34664121	2213	True	8743	False	6797
27124663	2457	True	21254	False	5150
50638140	1813	False	20322	False	6575
78525232	1381	True	9523	False	7168
102811108	1114	False	8408	False	864
95943018	1188	True	53564	False	8562
38248614	2136	True	47592	False	4723
44135930	1961	True	33531	False	557
75856105	1418	False	64782	False	3110
59911875	1656	True	31438	False	6802
171074684	415	True	36989	True	5244
37450119	2168	False	4378	False	7203
61390858	1600	True	3419	False	7
79947205	1365	False	68359	True	5427
139145004	701	False	560	False	6864
116432666	961	False	2218	False	4493
94741973	1202	True	9428	False	5437
47246607	1887	True	5926	False	6542
86219013	1297	True	813	False	3612
16155709	2934	True	456418	False	619
59125158	1670	True	3072	False	6633
71494665	1483	True	2728	False	1196
123476519	891	True	5798	False	3782
73992178	1443	True	13576	False	2228
124020919	883	True	6243	False	5862
42154731	2008	True	15049	False	8674
41633165	2029	True	13607	False	811
30093061	2359	True	10640	False	9363
74012665	1444	True	14832	False	3459
74670336	1435	True	7831	False	4769
166342693	446	True	1127	False	7886
26722956	2494	True	7198	False	369
100484521	1145	True	35862	False	825
109733308	1030	True	3896	False	5422
38605388	2122	True	8121	False	2655
124397750	878	True	1977	False	5861
110782130	1019	True	3065	False	5569
58303750	1681	False	447	False	5319
111357907	1014	True	10504	False	6957
152437167	553	False	1102	False	244
215977334	156	False	573	False	1974
29309615	2386	False	1386	False	8633
52159537	1782	False	119133	True	3385
44350713	1956	False	55960	False	9013
44998375	1932	False	6975	False	4458
89593031	1265	True	7260	False	3009
64019760	1585	False	3688	False	4204
75410417	1413	False	2960	False	6367
142893494	647	False	893	False	4865
107451253	1058	True	4464	False	2811
163762510	460	False	1849	False	4283
56845558	1700	True	4420	False	5309
77430500	1390	True	4559	False	9319
42318037	1997	True	1336	False	8329
114702099	982	True	22238	False	8067
71390811	1484	True	75359	False	5966
100632044	1143	True	61961	False	869
65964801	1556	True	19456	False	297
189554431	277	True	2957	False	4472
27430767	2463	False	3596924	True	4121
86520461	1295	True	28336	False	6884
120151060	927	True	4193	False	5833
115317076	976	True	5379	False	3662
93752055	1213	True	16762	False	1587
90463409	1252	True	5198	False	9469
62554745	1613	True	182110	False	357
127255345	844	True	29662	False	6180
48712659	1861	True	12248	False	1722
43542589	1924	True	3180	False	1396
68731185	1515	True	12119	False	167
107484156	1057	True	7987	False	2891
98655280	1161	False	4973	False	4062
74469496	1437	True	6921	False	2403
158902370	495	True	23914	False	5817
84339535	1213	False	589	False	6259
90490970	1254	True	14840	False	7290
67324252	1538	True	1194	False	1370
79156444	1372	False	1472	False	3021
22880550	2651	False	6430	False	4785
81791956	1345	False	20138	False	1723
42562842	1993	True	3529	False	7772
171119365	415	False	25301	False	2758
35852048	2221	True	2450	False	4087
121540107	914	True	46319	False	2935
28446548	2423	False	7061417	True	2234
135398122	742	False	1856	False	427
62483956	1615	False	89878	False	6684
70110726	1506	False	2678695	True	2914
104253957	1090	True	3764	False	8867
65057837	1563	True	4250	False	7625
106412664	1070	True	26809	False	8598
134930648	753	False	5550	False	4748
63570963	1592	True	10374	False	591
123884931	886	True	11286	False	3117
39405278	2093	True	7670	False	1000
38820151	2086	False	4337	False	8092
79316424	1372	True	17048	False	844
140928835	678	True	40609	False	5655
120060820	928	False	10202	False	8775
30860227	2329	False	3761	False	5156
69159384	1518	True	2745	False	1440
21648735	2742	True	648357	False	3096
83354198	1328	True	7620	False	4956
60787568	1641	False	4119	False	1659
95101009	1195	True	15977	False	4671
160170048	484	True	535	False	38
80470294	1355	False	63265	False	4778
49952730	1829	True	1022	False	8179
159670027	488	True	9417	False	916
139263325	700	True	1002	False	9068
50010143	1827	False	10056	False	3481
110084705	1012	False	4743	False	2086
84050133	1322	True	135514	False	121
58641888	1671	False	1398	False	2029
126953107	848	True	4578	False	5682
21047729	2770	False	21279	False	8548
194764163	249	True	11505	False	4257
55602183	1720	True	5769	False	6383
51110449	1803	False	2404	False	4937
93797665	1212	True	232819	False	9032
211485547	189	False	1100	False	490
151627201	564	True	6563	False	5425
59257912	1667	True	7102	False	7632
89747542	1263	True	117843	True	7844
85021233	1310	True	8544	False	2642
158886441	495	True	5170	False	9012
86693146	1281	True	1659	False	3057
31070415	2316	True	6144	False	3581
46152121	1913	False	4512	False	3811
131995691	791	False	36462	False	3491
110817928	1005	True	9349	False	7356
153430246	544	False	71	False	5890
129091022	825	True	83428	False	5027
113043988	973	True	361	False	6075
42668807	2001	True	3235	False	7297
66957938	1543	True	7811	False	6791
87732858	1273	True	7488	False	6814
191028479	269	True	2743	False	6688
41779166	2025	True	15587	False	9480
123079411	895	False	117043	True	5264
162916353	461	True	2604	False	5764
119203081	935	True	11873	False	5322
49337790	1846	False	1203267	True	3148
94603855	1203	True	7988	False	1504
25999696	2530	False	4321704	True	8406
131987967	786	True	6466	False	8526
81576953	1349	True	10661	False	576
26648030	2498	False	977	False	4304
67212380	1516	False	310	False	2949
75958342	1416	True	122845	False	7221
193290224	236	True	341	False	4614
85311558	1307	True	23496	False	43
152840162	551	True	61691	False	5743
88687107	1275	True	1697	False	296
54844912	1734	True	2614095	True	4313
40561505	2059	True	1529297	True	6270
69557232	1512	False	1479	False	4023
139181164	701	True	132860	False	2300
203236	3953	False	377586	False	3749
36237509	2216	False	18640	False	3186
119310548	931	True	737	False	1287
43782501	1971	True	10200	False	2531
42212417	2011	True	9773	False	4072
104573571	1090	True	1655	False	9343
157822185	499	True	2008	False	6520
36836361	2191	True	81635	False	2899
79224347	1373	True	89441	False	2063
62527683	1614	False	2416	False	3573
46574454	1904	True	18970	False	6284
176379910	374	True	1694	False	6287
142898932	655	True	288032	True	8052
79330836	1372	True	26341	False	9190
79272866	1369	False	7114	False	3979
126777707	850	True	9458	False	8423
40695370	2051	True	977	False	640
98608737	1159	False	5809	False	5509
27086058	2480	False	27999	False	1884
127735930	839	True	749409	True	2736
94797450	1201	True	2221	False	9263
40876660	2049	False	11596	False	8595
77051044	1400	False	28308	False	7700
20956324	2771	False	2243	False	676
53290823	1762	True	28330	False	6321
36669795	2198	True	7424	False	1374
88907176	1271	True	9471	False	4419
94284683	1207	True	161173	True	2284
44797766	1945	True	2441	False	2223
82238228	1341	False	106013	False	3907
49449356	1843	False	11440	False	1394
135836432	741	True	42136	False	7442
53805535	1752	True	2529	False	276
38041527	2144	False	8486	False	8159
54942725	1732	True	36226	False	5778
75624700	1415	True	10817	False	7131
136023164	738	False	993	False	1824
67570209	1500	False	2222	False	8979
104799815	1088	False	1828	False	7855
91910031	1236	True	17519	False	6914
165459493	451	True	6729	False	4539
154606326	534	False	586	False	3890
110360086	1022	True	4083	False	2801
144434500	636	False	859	False	5360
31051769	2285	True	1340	False	2328
114824534	980	True	7171	False	3090
47332139	1882	False	1044	False	8375
87251588	1282	False	1187	False	7957
38021907	2140	True	5889	False	6225
44741982	1916	False	2937	False	7811
176111743	369	True	2008	False	73
23683059	2634	False	3000	False	9457
160849070	479	True	4649	False	6389
113058969	999	False	131	False	5262
45867824	1921	True	8839	False	5860
83323037	1329	True	4191	False	9123
97585575	1171	False	119	False	1409
64756920	1575	True	3646452	True	4139
18841177	2854	False	20883	False	9233
58455750	1675	True	651	False	8024
105191422	1042	False	169	False	3461
48550751	1864	True	23467	False	7634
36873809	2186	True	1143	False	5513
39883761	2080	False	28500	False	2885
97954861	1159	False	10050	False	6404
39444815	2091	False	2818	False	4809
117611182	953	True	10860	False	3861
32481759	2268	True	69996	False	4889
143720515	646	True	15316	False	41
78428507	1382	True	17078	False	8411
52300084	1769	False	296	False	1346
106036840	1074	True	23027	False	9240
179235233	351	True	43046	False	6009
59733471	1660	True	161949	False	7888
68568817	1525	True	125872	True	1010
72231041	1470	False	1514	False	5837
58916031	1672	True	889	False	8974
137877378	717	True	6679	False	2034
45161723	1912	True	398	False	4175
28316446	2428	False	5198	False	2771
103950180	1096	True	3308	False	8112
95966119	1188	False	1690	False	9353
67644424	1536	True	24403	False	6384
132858977	781	True	161041	True	638
44362816	1955	True	6908	False	6414
69952549	1505	False	3172	False	3591
31812643	2292	True	20380	False	6398
125306694	867	True	14529	False	1058
43917294	1967	True	35881	False	4613
73462720	1451	True	349	False	7982
86941435	1286	True	1538	False	4470
127953551	836	False	564	False	6150
119847315	930	False	64528	False	8449
180605699	337	False	5620	False	2757
142897902	647	False	23891	False	7418
119240217	935	True	1920	False	7372
106441627	1047	False	3973	False	6311
166578941	444	True	40925	False	1588
57170989	1696	True	10178	False	4060
80134440	1364	True	117226	False	161
28162548	2434	False	3537	False	3994
111537400	992	False	1162	False	6529
81822078	1309	False	1828	False	216
53787699	1718	False	1866	False	3661
31654721	1655	True	2096	False	465
107413672	905	False	311	False	97
119836787	930	True	9527	False	2398
40115734	2070	False	5721	False	4334
37230792	2142	False	4542	False	3576
84980552	1311	False	9858	False	7476
75021520	1430	True	17692	False	6514
63204121	1595	False	1894	False	6231
43877777	1968	False	7577	False	813
38131272	2122	False	745	False	3226
104311592	1095	True	1902	False	6241
48241003	1862	True	17677	False	3677
48538222	1858	True	4752	False	4970
130747611	805	True	346416	True	1874
38628964	2121	False	6551	False	6753
102476911	1116	True	360	False	6446
22733254	2685	False	6680	False	4874
180038790	336	True	1328	False	6458
143331859	651	False	886	False	2626
30092222	2359	True	56019	False	939
39100125	2105	False	134650	True	4452
88809757	1270	False	1318	False	4781
92437456	1225	True	23753	False	5596
61819609	1627	True	3354	False	1573
66431238	1547	False	6742	False	5911
136720710	732	False	2230	False	8169
46530312	1900	True	3615	False	8555
74727900	1415	False	3256	False	274
66134719	1549	True	3767	False	2404
47215734	1892	True	3558	False	8648
111337384	1014	True	54079	False	4569
31446243	2307	False	9536357	True	3023
175991251	376	False	321	False	7777
67988982	1502	False	1606	False	6686
84452546	1317	True	30149	False	5282
150210515	551	True	565	False	1589
144747509	631	False	2667	False	6371
54407780	1740	True	2574	False	6751
128384267	832	True	5129	False	9022
79330185	1369	True	9167	False	8768
143058600	645	False	6096	False	5564
19186828	2825	False	5473	False	3934
87282449	1289	True	19773	False	2763
73975754	1413	False	818	False	1136
88123473	1281	False	3416	False	5808
147908160	603	True	20749	False	5505
50686409	1812	True	79008	False	6031
102389033	1121	True	6675	False	3067
92108000	1232	False	2930	False	7740
133543133	773	True	6914	False	7737
97000654	1165	False	3219	False	6504
135478540	744	False	2734	False	1670
186509307	297	False	1611	False	6967
36962208	2187	True	26680	False	1818
72980556	1460	False	42294	False	2580
39743888	2084	True	4337	False	8192
108607927	1044	True	7162	False	8477
124540180	876	True	5973	False	9252
48404115	1868	False	7433	False	3266
61838323	1627	False	38614	False	8157
44216649	1959	False	1528	False	7174
58855028	1669	True	115404	False	2108
89670102	1264	True	22598	False	271
63765125	1589	True	60235	True	8605
35916958	2230	True	6040	False	2699
122111167	907	True	30553	False	9079
26096800	2526	True	9676	False	7697
115875909	971	False	16418	False	4665
59037918	1666	False	2887	False	2448
175404425	380	True	5335	False	7834
65468985	1562	True	7665	False	1528
149685582	584	True	4049	False	778
106184551	1060	True	3441	False	9401
112525628	997	False	10218	False	175
112253054	1003	False	3943	False	3539
191465614	251	False	613	False	1244
78087835	1385	True	17177	False	963
123436559	887	False	769	False	9416
71447107	1484	True	4315	False	6621
121633541	913	True	12698	False	8690
132685010	780	False	463	False	4152
166325645	446	True	3102	False	6620
124575856	877	False	1229	False	4690
68506959	1526	True	4667	False	3086
48929119	1855	False	25739	False	3500
109578578	1031	True	9495	False	3708
120375526	926	True	58159	False	1300
170314738	421	True	3428	False	1740
118422145	941	True	967	False	8604
52263233	1775	False	1210	False	8399
27880889	2446	True	11759	False	2662
67344794	1538	False	14674	False	3706
40008812	2077	False	13101	False	8919
53889147	1749	False	136	False	7410
119080005	933	False	3454	False	625
56558571	1705	True	37722	False	8876
94192769	1182	False	914	False	651
49665831	1837	True	4647	False	4343
35483545	2234	False	2751	False	6920
40314037	2066	True	1701	False	5276
113967060	921	False	9927	False	9477
52991310	1767	True	2608	False	3085
63554850	1582	True	1071	False	4443
57184072	1696	False	35588	False	5290
127522998	833	True	4856	False	3568
29157943	2396	True	8293504	True	9057
55153756	1728	True	2611	False	6900
128092429	835	True	26476	False	5160
67795877	1526	True	3746	False	8788
202360064	222	True	1105	False	736
48872131	1850	False	2146	False	4710
47510525	1887	False	5258	False	8191
65696333	1557	True	763	False	7321
47627824	1884	False	70620803	True	9206
141508605	672	True	4025	False	9495
57093890	1697	False	14650	False	8804
118873072	940	True	6447	False	5707
55518295	1722	False	2148	False	3768
169099322	429	True	2219	False	34
94702125	1202	False	6003	False	5957
80644411	1357	True	6514	False	1348
36797837	2187	False	791	False	9098
110722226	1015	True	10748	False	8965
137273362	725	False	5406	False	4634
90902518	1222	False	1875	False	4584
79377108	1372	True	59785	False	7404
70650800	1487	False	7869	False	1699
88600572	1276	True	21128	False	6982
76314136	1410	True	4076	False	7923
36465912	2207	False	18789	False	6997
37302342	2165	False	1886	False	1014
47334551	1890	True	548	False	3970
132974061	780	True	1234	False	3758
97318463	1174	True	7857	False	804
90186564	1253	False	9455	False	5076
80734152	1357	True	58794	False	6793
27657451	2455	True	3441835	True	721
72847861	1462	True	5292	False	2610
117217883	957	False	11097	False	3812
60160906	1652	True	13988066	True	8769
55643424	1719	True	8288	False	1919
128063548	834	True	1525	False	3501
37469167	2167	False	27816	False	2431
70115318	1506	False	6375	False	6666
86785349	1236	True	3980	False	6924
144711349	636	True	6255	False	4427
65438007	1561	False	14350	False	172
185716529	300	False	16516	False	3916
106179917	1024	True	697	False	6585
58618422	1614	False	267	False	7307
68667617	1524	True	1740910	True	7797
92353597	1229	False	6408	False	7636
41503604	2033	True	212712	True	1663
48109643	1866	False	4049	False	3508
80220669	1363	False	1537	False	2615
92255357	1230	False	1637	False	7678
51399944	1790	True	992	False	2073
59249508	1667	False	2803	False	2805
161166697	465	True	1210	False	7816
95805460	1189	True	3052	False	4636
61429132	1631	False	17249	False	3124
133691129	763	False	3086	False	1439
84957236	1304	False	3008	False	3495
45985660	1918	True	9422	False	5550
135192010	744	False	3646	False	7391
140962941	678	True	9217	False	1585
59038592	1663	True	3188	False	3963
56782029	1700	True	6717	False	6503
62570288	1613	True	241960	True	8328
106033212	941	False	50	False	7017
214780698	176	False	4658	False	1604
40675304	2056	True	52615	False	5746
54884001	1734	False	2893	False	2698
134651913	755	False	2165	False	4628
46417578	1908	True	4941	False	972
110897941	1012	True	4230	False	6227
37439457	2168	True	50021	False	6878
52616787	1765	True	4055	False	4370
84812847	1295	False	16588	False	5205
110590551	1021	True	19256	False	8577
139718293	692	True	1016	False	6778
100869677	1141	False	503	False	4212
143399456	650	True	74097	False	3779
45370372	1929	True	415988	False	1752
210650101	183	True	450	False	575
76842076	1404	True	17248	False	5604
40112491	2073	True	3126	False	2537
143389600	648	True	5413	False	7871
103127634	1109	False	4078	False	3807
116734373	961	False	41425	False	3746
106288934	1070	True	11734	False	3343
88115504	1281	True	188597	True	1342
75757288	1417	True	36000	False	8044
98505893	1162	True	298828	True	2989
85992503	1299	True	301467	True	5212
138244922	713	True	18653	False	6442
50812353	1810	True	7785	False	366
138065779	714	True	8254	False	3079
135304431	746	True	6650	False	3033
44643910	1949	True	18390	False	5748
78679968	1379	False	9077	False	2275
102729126	1116	False	1635	False	823
116654425	963	True	21883	False	193
107120099	1063	False	1537	False	863
42351465	2007	True	662	False	5243
15781884	2945	False	24000	False	2331
73109355	1458	False	195870	True	2243
55828784	1710	False	2309	False	4789
140321356	684	True	1193	False	4952
39721571	1935	False	1618	False	3818
36805554	2113	False	14676	False	3989
119172929	929	True	1165	False	6875
83034345	1331	True	16449	False	131
132955714	761	False	1759	False	7552
138314497	638	True	176	False	437
132721434	775	True	14981	False	6232
63388498	1589	False	9076	False	5171
48519638	1865	True	4004	False	3741
61121110	1638	True	24649	False	2048
103824861	1101	False	2716	False	7460
29553834	2380	False	17349	False	5921
118451849	945	False	8372	False	6771
49360258	1846	True	5926	False	2483
62102123	1622	False	8309	False	3824
39608821	2088	False	22713	False	4900
84732902	1314	False	1404	False	1801
121962698	909	True	2614	False	115
32848062	2256	True	12877	False	2966
135997486	738	True	1347	False	5786
43547461	1965	False	34927	False	8728
79907835	1366	True	47635	False	1746
53347208	1757	False	21710	False	505
56610727	1704	True	8234	False	2280
80454110	1359	True	4379	False	4888
22989544	2674	True	12779	False	6395
36330978	2209	True	2837	False	4307
51737953	1788	True	1915	False	7812
144316498	641	False	12681	False	3512
97429775	1173	False	9141	False	5917
150545005	574	True	2153	False	4969
40140471	2071	False	925	False	9289
29450065	2378	True	6883	False	8830
89598922	1264	True	2054	False	6341
79743113	1368	True	25737	False	1242
107419563	1059	True	5334	False	3423
22453437	2704	True	13697	False	4141
81886735	1335	True	2250	False	7654
110929142	1016	True	874	False	4291
57699994	1689	True	7387	False	7202
50301024	1812	True	2014	False	8398
93328824	1217	False	5076	False	3146
183045469	319	True	929	False	1954
60228375	1647	False	1436	False	448
47754110	1853	False	3619	False	729
87531440	1287	True	2042	False	4573
64825220	1574	False	14489	False	5692
62652666	1607	False	4617	False	139
41700976	1945	False	5825	False	2105
124485783	878	True	12622	False	88
50626286	1813	True	2359	False	9326
75162577	1428	True	2267	False	5159
76671017	1406	True	36538	False	5783
96066657	1187	True	8609	False	4089
31847029	2291	True	11010	False	7343
30394978	2347	False	304438	False	1515
42379097	2009	True	2940	False	5668
40181046	2071	True	44978	False	516
111657231	1012	True	3178	False	926
69921825	1410	True	1313	False	6396
101900074	1128	False	164311	True	4500
36155078	2215	False	2229	False	8309
113443516	995	False	3025	False	400
68165649	1490	False	1568	False	4633
51584869	1792	True	3649	False	8912
73639993	1449	False	175	False	5796
189420993	203	False	173	False	3150
45040864	1939	True	9217	False	4217
32235853	2277	False	1477	False	4807
36092121	2223	True	13426	False	8332
53084480	1765	False	10893	False	176
78636235	1379	True	7720	False	2183
106534545	1069	True	880	False	3265
77909260	1387	False	5128	False	2087
140262884	687	True	9858	False	9160
46603775	1903	True	4475	False	4322
103417276	1107	True	4670	False	4968
103083337	1112	False	11921	False	6582
85917614	1299	False	15751	False	6754
43256767	1967	False	2536	False	1707
46544012	1906	True	2655757	True	7685
52396903	1777	False	12462	False	488
42655691	2001	False	1665	False	2447
49779157	1814	False	5180	False	2588
29074940	2386	True	2929	False	5169
94910011	1200	False	2994	False	7946
142999181	654	False	68464	True	9264
127890866	837	True	37718	False	7861
62643972	1611	False	1342	False	4477
174575754	390	True	2252	False	2409
28817185	2409	False	82227	True	6984
138652721	703	True	6959	False	6406
13497012	3023	False	9163	False	7385
53683599	1755	True	62472	False	5398
46422548	1751	True	1571	False	3772
117848129	951	True	8384	False	8240
110663269	1019	True	1229	False	3244
51425577	1759	False	4503	False	5611
43169884	1987	True	3068	False	8255
160435472	475	False	4031	False	1911
73299511	1437	False	907	False	4386
21096366	2770	True	127404	False	5716
56994377	1698	True	131972	True	426
42071692	2017	True	253233	False	7991
134681972	757	True	15883	False	3109
113950158	990	True	4690	False	3345
64342798	1581	False	24923	False	1597
58713881	1675	True	5912	False	6156
141976407	667	True	27401	False	5088
74598430	1403	False	788	False	1181
117131506	956	True	5340	False	1307
117897501	951	True	46642	False	8376
142252978	661	False	1332	False	5490
215551814	175	True	5708	False	3981
38445688	2120	True	1491	False	4976
26211618	2481	False	30787	False	633
135225819	749	True	853	False	7392
31538945	2302	True	4498320	True	6393
50937298	1806	False	1504	False	9148
42267310	1916	False	8743	False	7381
67789922	1534	True	12523	False	3804
51990779	1785	True	13411	False	2472
40290246	2067	False	373939	False	1133
141241629	675	True	21513	False	5026
32589527	2231	True	11429	False	996
100616035	1143	True	205889	False	6429
27944733	2442	False	3970	False	7878
76574716	1406	False	2387	False	4608
112241753	1006	True	15000	False	8175
21959243	2713	False	17373	False	2654
140119459	689	True	11074	False	1997
109086547	1038	True	3297	False	1065
36691454	2176	False	6524	False	4321
116649568	963	True	7284	False	7627
43777359	1971	False	21226	False	5672
26404480	2446	False	232	False	5617
49551995	1840	False	117292	True	3834
137714789	718	False	2095	False	4092
78428351	1382	True	96139	False	2967
126018243	855	True	1691	False	5014
41835381	2023	False	1677	False	3957
55970469	1712	False	4967	False	1546
49968852	1829	True	9677	False	8030
98724137	1159	True	6281	False	5931
79664232	1368	True	4398	False	2957
94635232	1203	False	17051	False	715
57642084	1689	True	2931	False	1808
31057027	2315	True	22293	False	5249
123997733	881	False	1446	False	2066
48107542	1874	True	367022	True	2347
131745465	791	True	1172	False	982
8800636	3275	True	115962	False	4051
51917557	1786	True	2098	False	7421
80524348	1359	True	549	False	7635
124038106	883	True	27932	False	858
66491108	1549	True	14211	False	2738
68259123	1529	True	111415	False	3528
113699124	992	True	5298	False	5939
140916285	679	False	1668	False	7947
173114969	401	True	28777	False	924
38473602	2109	False	2378	False	2257
36467201	2204	False	7757	False	9458
79906799	1338	False	1732	False	6921
39829350	2079	True	25847	False	8915
132508930	785	True	1582	False	7854
78503924	1381	False	3106	False	4617
36772497	2195	True	25175	False	3848
84591749	1315	False	1301990	True	654
102910072	1114	True	210042	True	1233
43234624	1986	True	67066	False	7792
29985249	2362	True	18177	False	1446
74081875	1430	False	1478	False	5514
31623891	2300	True	22273	False	1572
82685436	1330	False	3580	False	6689
39797135	2082	True	60768	False	226
72578790	1467	True	13025	False	8043
156498822	520	True	23423	False	8731
103079627	1111	False	1374	False	4442
71111611	1490	True	14888	False	2854
15391888	2956	True	7099	False	6951
152462810	555	False	813	False	5441
102054366	1125	True	1037	False	3924
32698021	2255	True	1323	False	6786
61955092	1580	False	8144	False	4048
28628095	2416	True	2958	False	2970
99613459	1149	True	25368	False	8699
108144989	1035	False	2359	False	5962
68859465	1521	True	234018	True	7950
156851770	516	True	1684	False	3151
106561186	1069	False	1823	False	9275
51093649	1797	False	21581	False	4708
204220969	210	False	1042	False	6087
40122466	2069	False	5107	False	9052
128135861	834	False	15716	False	1570
79243182	1373	False	7652	False	6705
140267501	687	True	114166	True	2319
25476811	2548	True	54047	False	9303
88377039	1276	True	80384	False	993
127024992	806	True	1250	False	9396
76421730	1409	True	395	False	3817
50489338	1817	True	6400	False	5758
90804263	1237	True	4548	False	2359
87683749	1285	True	560854	True	7373
40442742	2036	True	10682	False	3958
95303409	1183	False	932	False	8049
84338607	1313	False	7169	False	6708
100332431	1146	True	6261	False	7526
58892832	1673	True	46159	False	1860
99518767	1152	True	11142	False	1341
42205284	2013	False	51971	False	60
42121080	2016	True	343733	False	8121
51317103	1798	True	2226	False	1383
103944698	1100	True	125921	False	2612
134075655	766	True	7059	False	8681
123608768	889	True	3243	False	8276
95209254	1195	True	3202	False	1041
53548322	1757	False	32242	False	3063
62106340	1621	True	35905	False	6199
84634915	1315	False	1164	False	6559
25834490	2539	True	334544	True	5898
31449799	2305	True	30768	False	5017
103510290	1105	True	757	False	7141
71799658	1475	True	13793	False	2808
112062792	1008	True	20310	False	7173
135381773	747	True	49976	False	443
91439029	1241	True	2410	False	9459
74685745	1405	True	512	False	6862
121915061	769	False	167	False	979
65286012	1566	True	39181	False	6905
110939270	1017	False	10603	False	9143
90361177	1256	True	23151	False	5593
60418807	1629	False	6603	False	6206
36707447	2197	False	33745	False	4103
73401247	1452	True	7466	False	519
28237374	2431	False	288972	True	7822
47510326	1887	True	8002	False	7465
164978598	452	True	3314	False	4695
38340508	2132	False	19646	False	1106
58575718	1651	True	6882	False	1653
107947598	1052	True	15903	False	7964
159736134	488	True	10825	False	4801
91916540	1236	False	3847	False	1312
82356292	1339	False	4380	False	5804
63186325	1519	True	1383	False	5400
36980836	2186	False	152128	False	1224
11679003	3103	True	3733	False	7773
31669651	2298	False	31622	False	9100
68353122	1527	True	9168	False	8914
100762295	1140	True	9391	False	2376
40086935	2041	True	940	False	2553
39229462	1970	False	510	False	3475
78588417	1379	True	11050	False	6066
150035793	581	True	10654	False	4226
9484992	3223	True	107026	False	8644
172803772	404	False	1288	False	5823
133706508	771	True	1133	False	7439
26363926	2468	True	6972	False	7069
69245717	1515	False	5336	False	4981
31808522	2293	False	2681760	True	5798
138951479	688	True	24307	False	7324
60914917	1639	True	700	False	8999
54646282	1738	False	567	False	3191
116469610	963	False	6656	False	6898
92862407	1224	True	58306	False	8171
85167945	1309	True	4707	False	3992
124625987	876	True	40388	False	8925
36901134	2189	True	1962	False	2484
65237561	1566	False	117	False	7309
45526986	1927	False	15386	False	4433
23090559	2662	True	951	False	9174
39589267	2083	True	14428	False	3128
64722609	1575	True	13869	False	803
85533986	1304	True	6076	False	7926
86319331	1292	False	6396	False	781
31217413	2314	True	982779	True	3328
161467794	475	True	5399	False	1988
80953040	1347	True	386	False	9305
81458263	1339	True	2639	False	3463
65865532	1556	False	57643	False	1054
115862828	971	False	1172	False	6565
131945189	792	True	20877	False	7184
156629034	518	True	2215	False	2473
83784811	1324	False	21347	False	7666
114077129	959	True	812	False	6657
54876294	1733	True	758	False	3544
89813557	1261	False	9063	False	6577
82881816	1327	True	1563	False	6550
76785007	1405	True	6559	False	5384
110861684	1018	True	21177	False	4247
64430567	1580	False	7236	False	4895
125084089	870	False	17330	False	1509
32420755	2269	False	7985	False	7529
157693142	507	True	584780	True	7733
51878524	1787	False	12635	False	3835
27702539	2453	False	12215	False	9216
59306184	1666	False	35617	False	7102
78044327	1386	True	5814	False	4129
68476418	1355	False	148	False	7604
39028037	2107	True	102033	False	8239
101480990	1129	False	4185	False	7489
132730296	782	False	825	False	2009
52661294	1771	True	3490	False	1325
131711249	790	True	1946	False	153
86564624	1291	True	10186	False	6195
88360382	1251	True	961	False	4974
165582443	450	False	1762	False	3245
101398849	1123	False	5123	False	2244
135830355	741	True	3496	False	5175
81894995	1345	True	7368	False	7898
84782033	1313	True	18950	False	2732
11954205	3094	True	1416	False	7088
26349935	2509	True	4669	False	2539
93070833	1218	False	1893	False	5457
59970011	1656	True	120753	False	2591
40793840	2039	False	3448	False	8048
60515559	1647	True	64571	False	5303
132887527	776	True	1771	False	7580
74347581	1436	False	9788	False	8427
160561749	482	False	499	False	5433
53830541	1752	True	20052	False	5121
43995593	1965	False	70690	False	2355
49972924	1828	False	19088	False	983
89011086	1272	False	1765493	True	7525
31841727	2289	True	67233	False	4287
124017108	884	False	1268	False	3740
143771332	646	False	3268	False	988
156431824	515	True	7292	False	7879
123925283	885	True	1145655	True	7453
66511118	1544	True	10855	False	4775
101523352	1133	True	80043	False	4556
78981112	1370	True	1424	False	5756
118879620	939	False	3700	False	7830
129559622	819	False	1503	False	6420
119353723	923	False	15918	False	5888
81776974	1346	True	136410	False	830
160632761	481	True	2203	False	2292
29031846	2393	True	9049	False	9114
38599788	2098	False	4066	False	6146
141182253	675	True	12487	False	4485
41051038	2020	True	5253	False	5133
15937139	2940	True	35064	False	6761
87514772	1287	False	7949	False	4412
158469355	498	False	2766	False	1885
81151128	1353	True	25566	False	3973
39992732	2062	False	3952	False	9108
42300977	2010	True	54477	False	8959
39158767	2101	False	2233	False	572
64976071	1571	True	305415	True	7724
33610798	2249	True	18565	False	4061
148271496	599	False	2507	False	7204
125566685	863	True	3431	False	9314
38094658	2142	True	2919	False	1056
73855515	1446	False	3519	False	7288
38315762	2095	False	1330	False	5606
148391150	598	True	20281	False	723
43742023	1972	True	15168	False	7475
25451355	2553	True	2777	False	3945
179167194	352	True	2181	False	4600
131570004	796	True	956	False	7703
56788077	1701	True	17116	False	644
182059829	320	True	3566	False	461
168419856	433	False	7614	False	1805
131822785	778	True	2984	False	6107
136405188	731	True	1451	False	4738
24657677	2591	False	5322050	True	9340
79960850	1357	True	1074	False	1897
144442103	640	True	13609	False	432
44826307	1943	False	3728	False	8289
79377626	1372	False	19669	False	9031
104242170	1096	True	3673	False	4029
133647419	772	True	18755	False	5955
47200768	1893	True	119528	False	8527
44110799	1962	True	158247	False	2865
64754736	1568	True	554	False	2921
40166453	2063	False	1015	False	5210
37765806	2145	False	570	False	2346
141015744	678	True	7438	False	4699
39615085	2087	False	1463	False	8592
143318125	651	False	19476	False	4096
88582907	1277	False	69576	False	6210
57457813	1693	True	5730	False	8948
95321055	1195	True	23370	False	8825
42859934	1996	False	1774400	True	9109
205594577	211	True	2510	False	4594
111725891	1011	False	11089	False	1940
99534154	1152	True	4022	False	776
51634329	1791	True	21280	True	4713
136465592	735	True	13669	False	1856
56816074	1697	False	386	False	7248
36511269	2203	False	4838	False	4344
125912721	860	True	9351	False	957
40105334	2072	True	13924	False	5185
66865331	1542	False	4608	False	1268
40981398	2043	True	643	False	2838
54302691	1744	False	2157	False	3448
140924727	679	False	164676	False	1634
79554378	1370	True	3590	False	5660
50694517	1794	False	7646	False	1386
75353976	1424	False	8265	False	348
115116769	978	True	20355	False	6175
56994206	1679	True	352	False	6007
128264306	833	False	11095	False	6141
61069376	1627	True	6607	False	3502
97080916	1175	True	14221	False	3232
103742465	1103	True	14165	False	8847
60265285	1649	False	529	False	2792
96037773	1187	False	2584	False	6302
71170359	1489	True	16074	False	8391
209162507	198	False	3774	False	2482
153907202	541	True	2770	False	6985
95180799	1197	True	7128	False	5814
141159627	676	False	7221	False	1861
63881567	1588	True	39306	False	199
39993657	2075	True	4869	False	174
154115049	537	True	2574	False	5684
43880310	1968	False	1346786	True	2250
141841277	669	False	2256	False	2817
72485878	1468	False	5470	False	1741
171383210	413	True	6632	False	3716
44074668	1962	True	1905	False	973
133624600	772	False	20743	False	7668
41316720	2038	False	8770	False	7193
191148580	269	True	885	False	7294
122029445	906	True	4379	False	807
48043109	1813	False	1584	False	2955
195369502	222	False	473	False	3777
29506971	2382	False	8179	False	9107
98905288	1158	True	25946	False	1851
64010440	1581	True	375	False	8323
32618814	2260	False	4443	False	8396
94180997	1207	True	14301	False	3258
60235690	1632	False	966	False	4570
37526022	2159	False	52069	False	7205
59196455	1668	True	71558	False	607
110932275	1016	True	6538	False	7161
40171532	2067	False	38283	False	8208
27637081	2456	True	53657	False	7807
39205697	2093	False	9208	False	1021
114032283	989	False	9331	False	7929
92181544	1231	False	100935	True	2916
78442470	1381	True	46764	False	6969
115168131	978	False	11767	False	2821
60406710	1649	True	369896	True	8801
77596198	1392	True	1578	False	5301
172504545	399	False	386	False	7384
38235897	2125	True	128235	False	6834
29133396	2398	False	134851	True	1507
36426343	2200	True	1695	False	2671
71139212	1490	True	25939	False	9055
38780815	2116	False	227127	False	9432
12961441	3045	True	763	False	968
45183976	1933	True	26382	False	7581
161780148	466	False	224	False	2569
69637629	1512	True	2394	False	3185
64778799	1574	True	583376	True	7301
28375731	2422	True	8738	False	8636
62465967	1605	True	3125	False	5717
116268482	963	True	2489	False	4620
42566635	2003	False	4898	False	568
98100252	1166	True	11069	False	5194
39199388	2101	True	33478	False	4994
85003046	1310	True	12591	False	1613
125940946	834	True	7049	False	9005
46936733	1888	True	2305	False	7368
24097715	2615	True	7144	False	7551
51365822	1795	False	7343	False	1127
131639763	795	False	17709	False	6035
91188772	1240	True	6713	False	6715
93580366	1215	False	18455	False	6426
746366	3750	True	30238	False	6762
147707068	606	True	6830	False	3004
111247424	1015	False	3599	False	2826
81339957	1351	True	54251	False	5495
59114212	1670	False	3519790	True	422
68729544	1523	True	404137	True	8651
135530209	745	True	127051	True	1003
62482745	1615	False	51824	False	4624
75936182	1417	False	287086	False	7232
28197882	2433	True	7165	False	3443
152651493	553	False	21075	False	5963
79337478	1358	False	700	False	5390
46349879	1909	False	34064	False	9209
88158195	1280	False	1206	False	3506
191940350	244	True	503	False	1016
38307977	2129	True	578	False	7466
32673032	2261	True	22183	False	3947
146283489	622	False	873	False	8703
89808296	1262	True	6279	False	1844
154966528	532	True	7462	False	4034
89122134	1260	False	822	False	5368
40250967	2067	False	8451	False	6749
174270578	391	True	27840	False	5831
20385156	2795	True	19410	False	2489
78653203	1379	True	1971	False	6128
35763536	2237	True	7737728	True	7802
38894371	2112	True	9402	False	8707
12323890	3085	False	2171	False	1779
41995652	2019	True	3664	False	1982
68091736	1531	True	12439	False	9390
116808824	961	False	66863	False	4104
46010026	1917	True	12431	False	2139
32019744	2285	False	110956	False	3061
157264176	512	True	11193	False	5936
71094066	1490	True	68064	False	2212
73207633	1440	False	3053	False	2232
209295531	193	True	1323	False	3562
108519632	1045	True	9665	False	4743
122849717	898	True	8523	False	1414
42180019	2010	False	2164	False	4282
27807912	2448	True	4629	False	2427
23064497	2665	False	7383	False	3221
135551300	715	True	476	False	3651
45236465	1934	False	11846	False	136
205339308	192	False	2098	False	198
89465316	1266	True	8037	False	4892
130558019	800	True	975	False	7211
64560715	1576	True	1759	False	4366
90162770	1258	False	8027	False	921
60929418	1641	True	23803	False	7835
40512607	2060	False	672	False	6436
97960483	1168	True	21369	False	309
81776241	1345	True	3585	False	6941
68259739	1529	False	1251	False	2270
112017889	1006	True	3474	False	4973
39328203	2094	True	22886	False	966
42985881	1993	True	50217	False	6003
44532984	1951	True	8555	False	731
125594599	864	True	1964	False	1382
32203810	2278	False	14985	False	5198
140703248	682	True	15733	False	8962
1984424	3663	True	329967	False	1114
108215528	1047	False	978	False	9001
78593093	1375	True	14271	False	6008
96461591	1179	False	4375	False	5057
144286946	640	True	8729	False	5299
118821467	907	False	9451	False	2664
49236458	1846	False	4371	False	8760
86321153	1296	False	1492	False	1199
42142534	1991	False	13932	False	1630
103603584	1103	True	4000	False	4256
102935756	1114	False	5945	False	1865
37491758	2165	True	85304	False	2919
54391562	1742	False	577	False	7437
72556588	1466	True	830	False	4649
92213409	1232	True	123715	True	2423
73440555	1453	True	1765	False	4201
155832585	525	True	1209	False	5497
70041154	1507	False	14937	False	534
108598024	1041	True	6647	False	2761
52977699	1762	False	686	False	6651
45472281	1928	True	5194	False	3775
58762905	1651	True	3607	False	5554
216677194	165	False	3775	False	5983
30966327	2324	True	9229	False	321
19554860	2808	True	5568	False	4932
87397665	1288	False	3302	False	3062
125445835	866	False	6830	False	5870
150716240	574	True	7150	False	9386
45359696	1929	False	1861	False	4953
62038274	1622	True	39992	False	4771
133967278	759	True	7126	False	6638
11524494	3116	False	1340014	True	3663
130874625	804	True	7227	False	8435
28103111	2437	True	1695	False	2579
135347131	742	True	3178	False	1430
29752763	2370	True	870	False	9131
27861508	2370	True	12876	False	4911
101412758	1133	True	3622	False	6917
72924130	1461	True	12707	False	8828
1009303	3688	False	3185	False	5553
186755434	295	True	4913	False	8274
41605146	2022	False	985	False	3478
94343314	1205	True	1718	False	2413
116143804	962	False	1274	False	8017
67332429	1539	True	616963	True	7326
74798638	1416	True	7806	False	750
89895334	1261	True	535690	True	6045
75264088	1426	True	109511	True	7038
124571775	876	True	22981	False	2406
36109562	2222	True	208306	False	9014
74173135	1442	True	10886	False	1569
173005758	402	False	7663	False	5534
82510640	1338	True	2849	False	458
98029223	1167	True	2473	False	2137
73320771	1455	True	18385	False	1354
63468398	1523	True	351	False	7501
52826427	1766	True	15019	False	2506
126066653	858	True	14415	False	9362
119057469	938	True	21306	False	7686
42404198	1997	False	2837	False	1377
79419282	1362	True	7247	False	3405
42541710	2004	True	18565	False	4987
87241282	1289	False	91972	False	7314
65316624	1566	True	2857	False	5624
81965393	1338	True	19456	False	7179
53168735	1762	True	2687	False	1513
59227494	1666	False	7807	False	4340
36804054	2192	False	9764	False	3161
104419083	953	True	176	False	3800
153175174	528	False	428	False	655
140546090	676	False	810	False	4767
54646233	1738	True	1385765	True	3163
63144534	1600	True	4749	False	339
27146406	2409	False	1270	False	8302
108221486	1047	False	1230	False	3209
109507695	1033	True	48485	False	8619
72223646	1473	True	71977	False	1687
59171751	1669	False	5095	False	5140
46897472	1899	True	2836	False	3649
82028287	1335	True	208	False	6062
76835814	1393	True	18346	False	6360
56007715	1711	False	5787	False	4054
72429717	1468	False	1540	False	7076
80667848	1357	True	10018	False	5284
38497143	2123	True	357	False	6285
117285409	957	True	13127	False	6527
58727863	1638	True	1275	False	4285
32559827	2202	False	423	False	8741
119769750	917	True	4485	False	1537
108354627	1023	False	2080	False	6000
55509854	1722	True	39250	False	4198
81700745	1334	False	448	False	5695
89745821	1262	False	4562	False	8469
55264629	1727	False	46246	False	800
25545494	2471	False	206295	True	1602
29016912	2403	False	6208	False	475
35040115	2247	False	2721481	True	6281
57851308	1682	True	2372	False	2351
147092648	613	True	14427	False	8836
97092696	1176	True	4518	False	634
73951393	1445	True	56955	False	5850
42948075	1994	True	2626579	True	3173
107817066	1054	False	2443	False	7348
84828060	1313	True	17622	False	9117
85593160	1302	False	15427	False	1794
42372134	2009	False	313979	True	1770
65051529	1570	True	41656	False	3968
124879679	873	True	2084	False	464
38737023	2118	False	6082	False	8684
65638222	1557	True	2862	False	2230
117453868	955	False	135495	True	7624
60354202	1650	True	24955	False	6780
111911557	983	True	1386	False	2198
66567514	1548	True	108545	True	9066
38419714	2130	False	3270	False	2842
50247650	1820	False	1462	False	8973
101340552	1135	False	2067	False	3121
92465107	1228	True	5451	False	5732
162515916	462	True	1276	False	1968
61405455	1600	False	575	False	9418
111697620	1012	False	1402	False	4448
84492445	1316	False	1215	False	91
144399831	640	True	18458	False	7438
23398243	2650	True	4837	False	1074
133545316	773	False	2847	False	9073
98206325	1165	True	158444	False	355
55263759	1727	True	10679	False	1802
61921330	1621	True	66680	False	3494
207849910	203	False	7151	False	1415
11819137	3094	False	4758	False	3541
54479954	1739	True	36056	False	1797
135890884	731	True	2628	False	1131
137280518	725	False	3573	False	8850
178929267	354	True	4665	False	9247
165590951	450	True	25407	False	8740
43528672	1975	True	16488	False	6252
32986432	2252	True	412138	True	3080
111543075	1013	True	28448	False	453
77330078	1373	False	44	False	8002
48085716	1874	True	21740	False	8662
27390063	2465	True	264514	False	7052
33948044	2250	True	2966	False	223
77613944	1391	True	5832	False	1665
31885041	2289	True	945	False	2337
126650213	852	True	28200	False	1075
56602779	1704	True	106310	True	5137
172855566	399	False	2103	False	5515
39577049	2086	True	2130	False	8725
135492623	743	True	2016	False	7605
84715321	1312	True	5090	False	5647
113979617	990	True	5209	False	7115
127321512	844	True	141184	True	824
64936978	1572	True	4804	False	4046
109339798	1035	True	5447	False	3966
43579369	1969	False	412	False	3051
47729971	1868	True	1821	False	9196
80587560	1359	True	13975	False	8857
25298045	2559	False	9983	False	650
92949943	1223	True	71800	False	7486
139238145	700	True	623	False	3895
108683466	1014	False	2280	False	4740
46863381	1900	False	10314	False	2906
101385563	1134	False	2434	False	787
95162881	1186	True	2340	False	8967
109126575	1038	True	17684	False	5144
72273838	1472	True	127140	True	2285
78702562	1369	False	919	False	6882
57791021	1683	False	1518	False	1713
44241902	1959	True	5056	False	2882
173847380	370	True	1373	False	7484
157236267	512	True	3056	False	5705
42674844	2001	True	6113	False	9450
74840474	1433	True	22823	False	8452
71351127	1487	True	171489	True	8742
103489985	1011	False	1561	False	4871
48806665	1833	True	9897	False	4940
21840723	2732	False	4336	False	476
131662807	795	True	6036	False	552
36170703	2219	True	32218	False	6346
43545563	1976	False	20152	False	7574
69299623	1516	True	45921	False	6634
150665843	574	True	2051	False	8594
78916291	1369	False	2370	False	6181
11697560	3109	False	4445	False	9104
38802888	2108	False	31438	True	3154
126449298	854	False	132	False	7994
98341372	1129	False	652	False	2614
49494579	1841	True	2641	False	3449
113227001	997	False	184055	True	7755
147707682	606	True	3960	False	3341
46409712	1907	False	10971	False	5752
72317569	1471	True	9365	False	981
86962798	1292	True	8202	False	7339
76355296	1409	False	1571	False	3323
29000222	2402	False	7280	False	307
30376401	2346	False	8430	False	267
122336824	898	False	2302	False	7945
114629255	959	True	666	False	3842
39481063	2092	True	1021471	True	7496
79971286	1364	False	1139	False	3918
181335319	330	True	5094	False	7769
178030339	361	True	28169	False	1020
85433943	1306	False	1244	False	4373
77130237	1391	False	220	False	418
42564084	2004	True	2770	False	8517
38543308	2126	True	464799	False	4590
66133668	1552	True	1582	False	4420
126021568	856	True	1889	False	6986
139889276	692	True	15865	False	1525
106527475	1069	True	80694	False	8680
48164544	1866	True	950	False	6801
99917690	1149	True	8049	False	4541
181226121	334	False	430	False	1530
127726824	833	False	630	False	9081
44339249	1956	True	185013	False	2362
109602588	1031	True	6410	False	5633
42033341	2012	True	7193	False	4733
40191481	2060	False	5527	False	875
54628842	1738	True	4791	False	2603
28695872	2411	True	2011	False	4216
70683871	1497	True	19840	False	1878
27140296	2469	True	3192	False	4739
55680382	1719	True	20324	False	4254
63400174	1573	True	5230	False	5896
108191646	1049	False	23167	False	4562
143778553	646	True	3501	False	5039
116182242	966	True	6667	False	1881
55501256	1704	True	15474	False	1552
153709303	540	True	18861	False	263
174852869	386	True	10767	False	1592
76096208	1412	True	19093	False	4252
180605861	341	False	2838	False	3135
105043854	1037	True	11191	False	3673
79167762	1374	True	335946	True	154
46897359	1895	True	42209	False	3020
129278069	823	True	152248	False	4693
47597744	1885	False	108817	False	1266
84514202	1316	False	824	False	3130
95781132	1189	False	6171	False	150
37402880	2169	False	168480	True	8360
32556201	2233	True	3185	False	4027
168907884	429	True	21999	False	2959
60865547	1642	True	2384	False	8853
118899724	932	True	10769	False	6303
89511539	1266	True	5508	False	3249
135544153	744	True	7865	False	9065
52604902	1766	True	6523	False	743
52409910	1771	False	2273	False	7943
15949386	2939	False	29512	False	4365
18503039	2858	False	1184	False	140
72304806	1471	False	4933	False	7494
92768626	1204	True	6978	False	1384
62684854	1610	True	20036	False	9288
59403395	1665	True	5064	False	6457
87567801	1285	False	1540	False	4574
133830993	769	True	18527	False	5770
139734849	694	True	2653	False	3967
119169737	936	True	21194	False	5019
163901561	456	True	1208	False	7060
40336852	2062	True	28871	False	9150
73440886	1451	False	7617	False	4395
171088946	415	True	2306	False	8315
20590662	2784	True	11919	False	6776
80594599	1359	True	16818	False	5749
93579533	1215	True	5815	False	5916
143695057	646	True	3276	False	4151
157937968	504	True	6262	False	5637
71489078	1484	True	405	False	3216
52988723	1767	True	7979	False	1621
113116450	980	False	166	False	754
98513756	1152	True	1105	False	7490
52551413	1752	False	208	False	8482
37644475	2159	False	2556	False	8390
39001682	2108	True	121549	False	4369
79169751	1368	False	595	False	1289
41771926	2013	False	31118	False	3287
95867507	1188	True	4889	False	2680
62068836	1623	True	1995	False	3525
45920398	1909	False	663	False	7073
119965990	929	False	120846	False	1336
41055782	2046	False	2015	False	7931
108378875	1047	False	9453	False	5469
[truncated: 7,499 more rows]
