# Supplementary material
Source: ML conference proceedings conference paper supplement (https://proceedings.neurips.cc/paper_files/paper/2022/hash/040c816286b3844fd78f2124eec75f2e-Abstract.html)
Supplement: Supplementary file 1 [file 040c816286b3844fd78f2124eec75f2e-Supplemental-Conference.zip › DSSL/DSSL/src/data_utils.py]

import os
import torch
import torch.nn.functional as F
import numpy as np
from collections import defaultdict
from scipy import sparse as sp
from sklearn.metrics import roc_auc_score, f1_score
from torch_sparse import SparseTensor
from google_drive_downloader import GoogleDriveDownloader as gdd
from torch_geometric.utils import to_undirected
import torch_geometric.transforms as T
from torch_geometric.utils import to_dense_adj
import math

# def dataset_check(data, args, device, transform=None):
#     # check the label dim
#     if len(data.y.shape) == 1:
#         data.y = data.y.unsqueeze(1)
#     data.y.label = data.y.to(device)
#     # node num, class num, feature dim
#     n = data.num_nodes
#     c = max(data.y.max().item() + 1, data.y.shape[1])
#     d = data.x.shape[1]
#     # split
#     if args.split == 'rand':
#         split_idx_lst = []
#         for i in range(args.runs):
#             train_idx, valid_idx, test_idx = rand_train_test_idx(
#                 data.y, train_prop=args.train_prop, valid_prop=args.valid_prop, ignore_negative=False)
#             split_idx = {'train': train_idx,
#                             'valid': valid_idx,
#                             'test': test_idx}
#             split_idx_lst.append(split_idx)
#     elif args.split == 'balanced':
#         split_idx_lst = []
#         for i in range(args.runs):
#             train_idx, valid_idx, test_idx = rand_balance_idx(
#                 data.y, c, train_prop=args.train_prop, valid_prop=args.valid_prop, ignore_negative=False)
#             split_idx = {'train': train_idx,
#                             'valid': valid_idx,
#                             'test': test_idx}
#             split_idx_lst.append(split_idx)
#     else:
#         split_idx_lst = load_fixed_splits(args.dataset, args.sub_dataset, data, args.runs)
#     # symmetrize check
#     if not args.directed and args.dataset != 'ogbn-proteins':
#         data.edge_index = to_undirected(data.edge_index)
#     # transform features
#     if args.normalize_features:
#         data.transform = T.NormalizeFeatures()
#     # cuda load
#     try:
#         data = data.to(device)
#     except:
#         print('Error:data not on Cuda')
#     print(f"num nodes {n} | num classes {c} | num node feats {d}")
#     return data, n, c, d, split_idx_lst

def sample_neg_neighborhood(dataset, device, args):
    neighbor_max = args.neighbor_max
    adjacent_list = {}
    for i in range(0, dataset.graph['num_nodes']):
        adjacent_list[i] = dataset.graph['edge_index'][1, dataset.graph['edge_index'][0] == i]


    for i in range(0, dataset.graph['num_nodes']):
        # num_neighbor = adjacent_list[i].shape[0]
        # if num_neighbor < neighbor_max:
        #     more = math.ceil(neighbor_max / num_neighbor)
        #     adjacent_list[i] = adjacent_list[i].repeat(1, more)[0, :neighbor_max]
        perm = torch.randperm(dataset.graph['num_nodes'])#.to(device)
        adjacent_list[i] = perm[:neighbor_max]
    #print(adjacent_list)
    adjacent_list = list(adjacent_list.values())
    adjacent_list = torch.vstack(adjacent_list)
    return adjacent_list.to(device)


def sample_neighborhood(dataset, device, args):
    neighbor_max = args.neighbor_max
    adjacent_list = {}
    for i in range(0, dataset.graph['num_nodes']):
        adjacent_list[i] = dataset.graph['edge_index'][1, dataset.graph['edge_index'][0] == i]

    for i in range(0, dataset.graph['num_nodes']):
        num_neighbor = adjacent_list[i].shape[0]
        if num_neighbor < neighbor_max:
            more = math.ceil(neighbor_max / num_neighbor)
            adjacent_list[i] = adjacent_list[i].repeat(1, more)[0, :neighbor_max]
        if num_neighbor > neighbor_max:
            perm = torch.randperm(num_neighbor)
            idx = perm[:neighbor_max]
            adjacent_list[i] = adjacent_list[i][idx]
    adjacent_list = list(adjacent_list.values())
    adjacent_list = torch.vstack(adjacent_list)
    return adjacent_list.to(device)


def rand_train_test_idx(label, train_prop=.5, valid_prop=.25, ignore_negative=True):
    """ randomly splits label into train/valid/test splits """
    if ignore_negative:
        labeled_nodes = torch.where(label != -1)[0]
    else:
        labeled_nodes = label

    n = labeled_nodes.shape[0]
    train_num = int(n * train_prop)
    valid_num = int(n * valid_prop)

    perm = torch.as_tensor(np.random.permutation(n))

    train_indices = perm[:train_num]
    val_indices = perm[train_num:train_num + valid_num]
    test_indices = perm[train_num + valid_num:]

    if not ignore_negative:
        return train_indices, val_indices, test_indices
    # print (labeled_nodes)
    # print (train_indices)

    train_idx = labeled_nodes[train_indices.type(torch.LongTensor)]
    valid_idx = labeled_nodes[val_indices.type(torch.LongTensor)]
    test_idx = labeled_nodes[test_indices.type(torch.LongTensor)]

    return train_idx, valid_idx, test_idx

def rand_balance_idx(label, c, train_prop=.01, valid_prop=.05, ignore_negative=True):
    if ignore_negative:
        labeled_nodes = torch.where(label != -1)[0]
    else:
        labeled_nodes = label

    n = labeled_nodes.shape[0]
    train_num = int(n * train_prop)
    valid_num = int(n * valid_prop)

    # get num for each class
    train_class_num = math.ceil(train_num / c)
    valid_class_num = math.ceil(valid_num / c)
    # get idx for each class
    train_indices = []
    valid_indices = []
    test_indices = []
    for ci in range(c):
        class_idx = torch.where(labeled_nodes == ci)[0]
        perm = torch.as_tensor(np.random.permutation(class_idx.shape[0]))
        train_class_idx = class_idx[perm[:train_class_num]]
        valid_class_idx = class_idx[perm[train_class_num:train_class_num + valid_class_num]]
        test_class_idx = class_idx[perm[train_class_num + valid_class_num:]]
        train_indices.append(train_class_idx)
        valid_indices.append(valid_class_idx)
        test_indices.append(test_class_idx)

    train_indices = torch.hstack(train_indices)
    val_indices = torch.hstack(valid_indices)
    test_indices = torch.hstack(test_indices)

    if not ignore_negative:
        return train_indices, val_indices, test_indices

    train_idx = labeled_nodes[train_indices]
    valid_idx = labeled_nodes[val_indices]
    test_idx = labeled_nodes[test_indices]

    return train_idx, valid_idx, test_idx

def even_quantile_labels(vals, nclasses, verbose=True):
    """ partitions vals into nclasses by a quantile based split,
    where the first class is less than the 1/nclasses quantile,
    second class is less than the 2/nclasses quantile, and so on
    
    vals is np array
    returns an np array of int class labels
    """
    label = -1 * np.ones(vals.shape[0], dtype=np.int)
    interval_lst = []
    lower = -np.inf
    for k in range(nclasses - 1):
        upper = np.nanquantile(vals, (k + 1) / nclasses)
        interval_lst.append((lower, upper))
        inds = (vals >= lower) * (vals < upper)
        label[inds] = k
        lower = upper
    label[vals >= lower] = nclasses - 1
    interval_lst.append((lower, np.inf))
    if verbose:
        print('Class Label Intervals:')
        for class_idx, interval in enumerate(interval_lst):
            print(f'Class {class_idx}: [{interval[0]}, {interval[1]})]')
    return label


def to_planetoid(dataset):
    """
        Takes in a NCDataset and returns the dataset in H2GCN Planetoid form, as follows:

        x => the feature vectors of the training instances as scipy.sparse.csr.csr_matrix object;
        tx => the feature vectors of the test instances as scipy.sparse.csr.csr_matrix object;
        allx => the feature vectors of both labeled and unlabeled training instances
            (a superset of ind.dataset_str.x) as scipy.sparse.csr.csr_matrix object;
        y => the one-hot labels of the labeled training instances as numpy.ndarray object;
        ty => the one-hot labels of the test instances as numpy.ndarray object;
        ally => the labels for instances in ind.dataset_str.allx as numpy.ndarray object;
        graph => a dict in the format {index: [index_of_neighbor_nodes]} as collections.defaultdict
            object;
        split_idx => The ogb dictionary that contains the train, valid, test splits
    """
    split_idx = dataset.get_idx_split('random', 0.25)
    train_idx, valid_idx, test_idx = split_idx["train"], split_idx["valid"], split_idx["test"]

    graph, label = dataset[0]

    label = torch.squeeze(label)

    print("generate x")
    x = graph['node_feat'][train_idx].numpy()
    x = sp.csr_matrix(x)

    tx = graph['node_feat'][test_idx].numpy()
    tx = sp.csr_matrix(tx)

    allx = graph['node_feat'].numpy()
    allx = sp.csr_matrix(allx)

    y = F.one_hot(label[train_idx]).numpy()
    ty = F.one_hot(label[test_idx]).numpy()
    ally = F.one_hot(label).numpy()

    edge_index = graph['edge_index'].T

    graph = defaultdict(list)

    for i in range(0, label.shape[0]):
        graph[i].append(i)

    for start_edge, end_edge in edge_index:
        graph[start_edge.item()].append(end_edge.item())

    return x, tx, allx, y, ty, ally, graph, split_idx


def to_sparse_tensor(edge_index, edge_feat, num_nodes):
    """ converts the edge_index into SparseTensor
    """
    num_edges = edge_index.size(1)

    (row, col), N, E = edge_index, num_nodes, num_edges
    perm = (col * N + row).argsort()
    row, col = row[perm], col[perm]

    value = edge_feat[perm]
    adj_t = SparseTensor(row=col, col=row, value=value,
                         sparse_sizes=(N, N), is_sorted=True)

    # Pre-process some important attributes.
    adj_t.storage.rowptr()
    adj_t.storage.csr2csc()

    return adj_t


def normalize(edge_index):
    """ normalizes the edge_index
    """
    adj_t = edge_index.set_diag()
    deg = adj_t.sum(dim=1).to(torch.float)
    deg_inv_sqrt = deg.pow(-0.5)
    deg_inv_sqrt[deg_inv_sqrt == float('inf')] = 0
    adj_t = deg_inv_sqrt.view(-1, 1) * adj_t * deg_inv_sqrt.view(1, -1)
    return adj_t


def gen_normalized_adjs(dataset):
    """ returns the normalized adjacency matrix
    """
    row, col = dataset.graph['edge_index']
    N = dataset.graph['num_nodes']
    adj = SparseTensor(row=row, col=col, sparse_sizes=(N, N))
    deg = adj.sum(dim=1).to(torch.float)
    D_isqrt = deg.pow(-0.5)
    D_isqrt[D_isqrt == float('inf')] = 0

    DAD = D_isqrt.view(-1,1) * adj * D_isqrt.view(1,-1)
    DA = D_isqrt.view(-1,1) * D_isqrt.view(-1,1) * adj
    AD = adj * D_isqrt.view(1,-1) * D_isqrt.view(1,-1)
    return DAD, DA, AD


def eval_acc(y_true, y_pred):
    acc_list = []
    y_true = y_true.detach().cpu().numpy()
    y_pred = y_pred.argmax(dim=-1, keepdim=True).detach().cpu().numpy()

    for i in range(y_true.shape[1]):
        is_labeled = y_true[:, i] == y_true[:, i]
        correct = y_true[is_labeled, i] == y_pred[is_labeled, i]
        acc_list.append(float(np.sum(correct))/len(correct))

    return sum(acc_list)/len(acc_list)


def eval_rocauc(y_true, y_pred):
    """ adapted from ogb
    https://github.com/snap-stanford/ogb/blob/master/ogb/nodeproppred/evaluate.py"""
    rocauc_list = []
    y_true = y_true.detach().cpu().numpy()
    if y_true.shape[1] == 1:
        # use the predicted class for single-class classification
        y_pred = F.softmax(y_pred, dim=-1)[:,1].unsqueeze(1).cpu().numpy()
    else:
        y_pred = y_pred.detach().cpu().numpy()

    for i in range(y_true.shape[1]):
        # AUC is only defined when there is at least one positive data.
        if np.sum(y_true[:, i] == 1) > 0 and np.sum(y_true[:, i] == 0) > 0:
            is_labeled = y_true[:, i] == y_true[:, i]
            score = roc_auc_score(y_true[is_labeled, i], y_pred[is_labeled, i])
                                
            rocauc_list.append(score)

    if len(rocauc_list) == 0:
        raise RuntimeError(
            'No positively labeled data available. Cannot compute ROC-AUC.')

    return sum(rocauc_list)/len(rocauc_list)


@torch.no_grad()
def evaluate(out, data, split_idx, eval_func):
    train_acc = eval_func(
        data.y[split_idx['train']], out[split_idx['train']])
    valid_acc = eval_func(
        data.y[split_idx['valid']], out[split_idx['valid']])
    test_acc = eval_func(
        data.y[split_idx['test']], out[split_idx['test']])
    return train_acc, valid_acc, test_acc, out


# def load_fixed_splits(dataset, sub_dataset, data, runs):
#     """ loads saved fixed splits for dataset
#     """
#     name = dataset
#     if sub_dataset and sub_dataset != 'None':
#         name += f'-{sub_dataset}'
#
#     # split: torch_geometric > file > None
#     if data.train_mask is None:
#         if not os.path.exists(f'./data/splits/{name}-splits.npy'):
#             assert dataset in splits_drive_url.keys()
#             gdd.download_file_from_google_drive(
#                 file_id=splits_drive_url[dataset], \
#                 dest_path=f'./data/splits/{name}-splits.npy', showsize=True)
#
#         splits_lst = np.load(f'./data/splits/{name}-splits.npy', allow_pickle=True)
#     else:
#         splits_lst = []
#         if dataset in ['Cora', 'Citeseer', 'Pubmed']:
#             for i in range(runs):
#                 train_idx, valid_idx, test_idx = data.train_mask, data.val_mask, data.test_mask
#                 split_idx = {'train': train_idx,
#                                 'valid': valid_idx,
#                                 'test': test_idx}
#                 splits_lst.append(split_idx)
#         elif dataset in ['chameleon', 'cornell', 'film', 'squirrel', 'texas', 'wisconsin']:
#             for i in range(runs):
#                 train_idx, valid_idx, test_idx = data.train_mask[:,i], data.val_mask[:,i], data.test_mask[:,i]
#                 split_idx = {'train': train_idx,
#                                 'valid': valid_idx,
#                                 'test': test_idx}
#                 splits_lst.append(split_idx)
#
#     # turn into torch tensor
#     for i in range(len(splits_lst)):
#         for key in splits_lst[i]:
#             if not torch.is_tensor(splits_lst[i][key]):
#                 splits_lst[i][key] = torch.as_tensor(splits_lst[i][key])
#     return splits_lst

def load_fixed_splits(dataset, sub_dataset):
    """ loads saved fixed splits for dataset
    """
    name = dataset
    if sub_dataset and sub_dataset != 'None':
        name += f'-{sub_dataset}'
    print (f'./data/splits/{name}-splits.npy')
    if not os.path.exists(f'./data/splits/{name}-splits.npy'):
        assert dataset in splits_drive_url.keys()
        gdd.download_file_from_google_drive(
            file_id=splits_drive_url[dataset], \
            dest_path=f'./data/splits/{name}-splits.npy', showsize=True)

    splits_lst = np.load(f'./data/splits/{name}-splits.npy', allow_pickle=True)
    for i in range(len(splits_lst)):
        for key in splits_lst[i]:
            if not torch.is_tensor(splits_lst[i][key]):
                splits_lst[i][key] = torch.as_tensor(splits_lst[i][key])
    return splits_lst

dataset_drive_url = {
    'twitch-gamer_feat' : '1fA9VIIEI8N0L27MSQfcBzJgRQLvSbrvR',
    'twitch-gamer_edges' : '1XLETC6dG3lVl7kDmytEJ52hvDMVdxnZ0',
    'snap-patents' : '1ldh23TSY1PwXia6dU0MYcpyEgX-w3Hia', 
    'pokec' : '1dNs5E7BrWJbgcHeQ_zuy5Ozp2tRCWG0y', 
    'yelp-chi': '1fAXtTVQS4CfEk4asqrFw9EPmlUPGbGtJ', 
    'wiki_views': '1p5DlVHrnFgYm3VsNIzahSsvCD424AyvP', # Wiki 1.9M 
    'wiki_edges': '14X7FlkjrlUgmnsYtPwdh-gGuFla4yb5u', # Wiki 1.9M 
    'wiki_features': '1ySNspxbK-snNoAZM7oxiWGvOnTRdSyEK' # Wiki 1.9M
}

splits_drive_url = {
    'snap-patents' : '12xbBRqd8mtG_XkNLH8dRRNZJvVM4Pw-N', 
    'pokec' : '1ZhpAiyTNc0cE_hhgyiqxnkKREHK7MK-_', 
}
