# Supplementary material
Source: ML conference proceedings conference paper supplement (https://proceedings.neurips.cc/paper_files/paper/2022/hash/040c816286b3844fd78f2124eec75f2e-Abstract.html)
Supplement: Supplementary file 1 [file 040c816286b3844fd78f2124eec75f2e-Supplemental-Conference.zip › DSSL/DSSL/src/datasets.py]

import os.path as osp

from torch_geometric.datasets import Planetoid, Coauthor, Amazon
import torch_geometric.transforms as T


def get_planetoid_dataset(name, normalize_features=False, transform=None):

    path = osp.join(osp.dirname(osp.realpath(__file__)), '..', 'data', name)
    dataset = Planetoid(path, name)
    if transform is not None and normalize_features:
        dataset.transform = T.Compose([T.NormalizeFeatures(), transform])
    elif normalize_features:
        dataset.transform = T.NormalizeFeatures()
    elif transform is not None:
        dataset.transform = transform

    return dataset


def get_coauthor_dataset(name, normalize_features=False, transform=None):
    path = osp.join(osp.dirname(osp.realpath(__file__)), '..', 'data', name)
    dataset = Coauthor(path, name)
    
    if transform is not None and normalize_features:
        dataset.transform = T.Compose([T.NormalizeFeatures(), transform])
    elif normalize_features:
        dataset.transform = T.NormalizeFeatures()
    elif transform is not None:
        dataset.transform = transform

    return dataset


def get_amazon_dataset(name, normalize_features=False, transform=None):
    path = osp.join(osp.dirname(osp.realpath(__file__)), '..', 'data', name)
    dataset = Amazon(path, name)
    
    if transform is not None and normalize_features:
        dataset.transform = T.Compose([T.NormalizeFeatures(), transform])
    elif normalize_features:
        dataset.transform = T.NormalizeFeatures()
    elif transform is not None:
        dataset.transform = transform

    return dataset
