# Supplementary material
Source: ML conference proceedings conference paper supplement (https://proceedings.neurips.cc/paper_files/paper/2022/hash/040c816286b3844fd78f2124eec75f2e-Abstract.html)
Supplement: Supplementary file 1 [file 040c816286b3844fd78f2124eec75f2e-Supplemental-Conference.zip › DSSL/DSSL/src/models.py]

import torch
import torch.nn as nn
import torch.nn.functional as F
from torch_sparse import SparseTensor, matmul
from torch_geometric.nn import GCNConv, SGConv, GATConv, JumpingKnowledge, APPNP, GCN2Conv, MessagePassing
from torch_geometric.nn.conv.gcn_conv import gcn_norm
import numpy as np
import scipy.sparse
from tqdm import tqdm
import os
from sklearn.metrics.pairwise import cosine_similarity
import scipy.sparse as sp
from torch_geometric.utils import get_laplacian
import copy

class MLP(nn.Module):
    def __init__(self, in_channels, hidden_channels, out_channels, num_layers,
                 dropout=.0):
        super(MLP, self).__init__()
        self.linear1 = nn.Linear(in_channels, hidden_channels)
        self.linear2 = nn.Linear(hidden_channels, out_channels)
        self.dropout = dropout

    def reset_parameters(self):
        self.linear1.reset_parameters()
        self.linear2.reset_parameters()

    def forward(self, data):
        x = data
        x = F.relu(self.linear1(x))
        x = F.dropout(x, p=self.dropout, training=self.training)
        x = self.linear2(x)
        return x

class LogisticRegression(nn.Module):
    def __init__(self, num_dim, num_class):
        super().__init__()
        self.linear = nn.Linear(num_dim, num_class)
        torch.nn.init.xavier_uniform_(self.linear.weight.data)
        self.linear.bias.data.fill_(0.0)
        self.cross_entropy = nn.CrossEntropyLoss()

    def forward(self, x, y):
        logits = self.linear(x)
        loss = self.cross_entropy(logits, y)
        return logits, loss

class EMA():
    def __init__(self, beta):
        super().__init__()
        self.beta = beta

    def update_average(self, old, new):
        if old is None:
            return new
        return old * self.beta + (1 - self.beta) * new


def update_moving_average(target_ema_updater, ma_model, current_model):
    for current_params, ma_params in zip(current_model.parameters(), ma_model.parameters()):
        old_weight, up_weight = ma_params.data, current_params.data
        ma_params.data = target_ema_updater.update_average(old_weight, up_weight)


def set_requires_grad(model, val):
    for p in model.parameters():
        p.requires_grad = val

def init_weights(m):
    if type(m) == nn.Linear:
        torch.nn.init.xavier_uniform_(m.weight)
        m.bias.data.fill_(0.01)

def loss_fn(x, y):
    x = F.normalize(x, dim=-1, p=2)
    y = F.normalize(y, dim=-1, p=2)
    return 2 - 2 * (x * y).sum(dim=-1)


class DSSL(torch.nn.Module):
    def __init__(self, encoder, hidden_channels,dataset, device, cluster_num, alpha,gamma,tao,beta,moving_average_decay=0.0):
        super(DSSL, self).__init__()
        self.dataset = dataset
        self.device = device
        self.cluster_num = cluster_num
        self.alpha = alpha
        self.gamma = gamma
        self.tao = tao
        self.beta=beta
        self.inner_dropout = True
        self.inner_activation = True
        self.online_encoder=encoder
        self.target_encoder = copy.deepcopy(self.online_encoder)
        set_requires_grad(self.target_encoder, False)
        self.target_ema_updater = EMA(moving_average_decay)

        self.mlp_inference = MLP(hidden_channels, hidden_channels, cluster_num, 2)
        self.mlp_predictor = MLP(hidden_channels, hidden_channels, hidden_channels, 2)
        self.clusters = nn.Parameter(torch.nn.init.normal_(torch.Tensor(hidden_channels, cluster_num)))
        self.mlp_predictor2 = MLP(cluster_num, hidden_channels, hidden_channels, 1)

        self.Embedding_mlp = True
        self.inference_mlp = True


    def reset_parameters(self):
        self.mlp_inference.reset_parameters()
        self.mlp_predictor.reset_parameters()
        self.mlp_predictor2.reset_parameters()
        self.online_encoder.reset_parameters()
        self.target_encoder = copy.deepcopy(self.online_encoder)


    def update_moving_average(self):
        #assert self.use_momentum, 'you do not need to update the moving average, since you have turned off momentum for the target encoder'
        assert self.target_encoder is not None, 'target encoder has not been created yet'
        update_moving_average(self.target_ema_updater,self.target_encoder, self.online_encoder)


    def forward(self, embedding,neighbor_embedding):
        # expand node embedding
        embedding_more = embedding[:, None, :]
        embedding_expand = embedding_more.expand(-1, neighbor_embedding.shape[1], -1)
        # loss
        if self.inference_mlp == True:
            k, k_node, entropy_loss = self.inference_network(embedding_expand, neighbor_embedding)
        else:
            k, k_node, entropy_loss = self.inference_network2(embedding_expand, neighbor_embedding)

        if self.Embedding_mlp == True:
            main_loss = self.generative_network(embedding_expand, k, neighbor_embedding)
        else:
            main_loss = self.generative_network2(embedding_expand, k, neighbor_embedding)
        context_loss = self.context_network(embedding,k_node)

        return main_loss, context_loss, entropy_loss,k_node
        

    # N × K, N × 10 * K, k is N*32
    def inference_network(self, embedding_expand, neighbor_embedding):
        # get k
        cat_embedding = embedding_expand*neighbor_embedding
        # cat_embedding=torch.cat((embedding_expand,neighbor_embedding))
        k = F.softmax(self.mlp_inference(cat_embedding), dim=2)
        k_node = k.mean(dim=1) #to get P(k|x)
        negative_entropy = k_node * torch.log(k_node+1e-10)
        #minimize negative entropy
        entropy_loss = negative_entropy.sum(-1).mean()
        return k, k_node, entropy_loss

    def inference_network2(self, embedding_expand, neighbor_embedding):
        # get k
        # cat_embedding = embedding_expand*neighbor_embedding
        k  = torch.matmul(cat_embedding, self.clusters)
        #print(k)
        k_node = k.mean(dim=1) #to get P(k|x)
        negative_entropy = k_node * torch.log(F.softmax(k_node, dim=1)+1e-10)
        #minimize negative entropy
        #print(negative_entropy)
        entropy_loss = negative_entropy.sum(-1).mean()

        return k, k_node, entropy_loss


    def generative_network(self, embedding_expand, k, neighbor_embedding):
        # 
        # re-parameterization trick
        gumbel_k = F.gumbel_softmax(k, hard=False)
        central=self.mlp_predictor(embedding_expand)+ self.beta*self.mlp_predictor2(gumbel_k)
        neighbor=neighbor_embedding
        loss= loss_fn(central, neighbor.detach()).mean()

        return loss

    def generative_network2(self, embedding_expand, k, neighbor_embedding):
        # em algorithm (to do)
        # re-parameterization trick
        gumbel_k = F.gumbel_softmax(k, hard=True)
        central=(embedding_expand)+ self.beta*self.mlp_predictor2(gumbel_k)
        neighbor=neighbor_embedding
        loss= loss_fn(central, neighbor).mean()
        return loss

    def context_network(self, embedding, k_node):
        # self.clusters.data = F.normalize(self.clusters.data, dim=-1, p=2)
        kprior = torch.matmul(embedding, self.clusters)
        kprior = F.softmax(kprior/self.tao, dim=1)

        context_loss = k_node *torch.log(kprior+1e-10)
        context_loss = - 1.0 * context_loss.sum(-1).mean()
        return context_loss


    def update_cluster(self, new_center,batch_sum):
        with torch.no_grad():
            out_ids = torch.arange(self.cluster_num).to(self.device)
            out_ids = out_ids.long()
            self.clusters.index_copy_(1, out_ids, new_center)
            self.clusters.data=torch.mul(self.clusters.data.T ,1/ (batch_sum+1)).T
