# Supplementary material
Source: ML conference proceedings conference paper supplement (https://proceedings.neurips.cc/paper_files/paper/2022/hash/040c816286b3844fd78f2124eec75f2e-Abstract.html)
Supplement: Supplementary file 1 [file 040c816286b3844fd78f2124eec75f2e-Supplemental-Conference.zip › DSSL/DSSL/src/utils.py]

import pickle as pkl
import sys
import os
import networkx as nx
import numpy as np
import scipy.sparse as sp
import torch

from normalization import fetch_normalization, row_normalize

datadir = "data"

def index_to_mask(index, size):
    mask = torch.zeros(size, dtype=torch.bool, device=index.device)
    mask[index] = 1
    return mask
def random_planetoid_splits(data, num_classes, lcc_mask):
    # Set new random planetoid splits:
    # * 20 * num_classes labels for training
    # * 500 labels for validation
    # * 1000 labels for testing

    indices = []
    if lcc_mask is not None:
        for i in range(num_classes):
            index = (data.y[lcc_mask] == i).nonzero().view(-1)
            index = index[torch.randperm(index.size(0))]
            indices.append(index)
    else:
        for i in range(num_classes):
            index = (data.y == i).nonzero().view(-1)
            index = index[torch.randperm(index.size(0))]
            indices.append(index)

    train_index = torch.cat([i[:20] for i in indices], dim=0)

    rest_index = torch.cat([i[20:] for i in indices], dim=0)
    rest_index = rest_index[torch.randperm(rest_index.size(0))]

    data.train_mask = index_to_mask(train_index, size=data.num_nodes)
    data.val_mask = index_to_mask(rest_index[:500], size=data.num_nodes)
    data.test_mask = index_to_mask(rest_index[500:1500], size=data.num_nodes)

    return data


def sys_normalized_adjacency(adj):
   adj = sp.coo_matrix(adj)
   adj = adj + sp.eye(adj.shape[0])
   row_sum = np.array(adj.sum(1))
   row_sum=(row_sum==0)*1+row_sum
   d_inv_sqrt = np.power(row_sum, -0.5).flatten()
   d_inv_sqrt[np.isinf(d_inv_sqrt)] = 0.
   d_mat_inv_sqrt = sp.diags(d_inv_sqrt)
   return d_mat_inv_sqrt.dot(adj).dot(d_mat_inv_sqrt).tocoo()

def sparse_mx_to_torch_sparse_tensor(sparse_mx):
    """Convert a scipy sparse matrix to a torch sparse tensor."""
    sparse_mx = sparse_mx.tocoo().astype(np.float32)
    indices = torch.from_numpy(
        np.vstack((sparse_mx.row, sparse_mx.col)).astype(np.int64))
    values = torch.from_numpy(sparse_mx.data)
    shape = torch.Size(sparse_mx.shape)
    return torch.sparse.FloatTensor(indices, values, shape)

def random_coauthor_amazon_splits(data, num_classes, lcc_mask):
    # Set random coauthor/co-purchase splits:
    # * 20 * num_classes labels for training
    # * 30 * num_classes labels for validation
    # rest labels for testing
    indices = []
    if lcc_mask is not None:
        for i in range(num_classes):
            index = (data.y[lcc_mask] == i).nonzero().view(-1)
            index = index[torch.randperm(index.size(0))]
            indices.append(index)
    else:
        for i in range(num_classes):
            index = (data.y == i).nonzero().view(-1)
            index = index[torch.randperm(index.size(0))]
            indices.append(index)

    train_index = torch.cat([i[:20] for i in indices], dim=0)
    val_index = torch.cat([i[20:50] for i in indices], dim=0)
    rest_index = torch.cat([i[50:] for i in indices], dim=0)
    rest_index = rest_index[torch.randperm(rest_index.size(0))]
    data.train_mask = index_to_mask(train_index, size=data.num_nodes)
    data.val_mask = index_to_mask(val_index, size=data.num_nodes)
    data.test_mask = index_to_mask(rest_index, size=data.num_nodes)
    return data


def parse_index_file(filename):
    """Parse index file."""
    index = []
    for line in open(filename):
        index.append(int(line.strip()))
    return index

def preprocess_citation(adj, features, normalization="FirstOrderGCN"):
    adj_normalizer = fetch_normalization(normalization)
    adj = adj_normalizer(adj)
    features = row_normalize(features)
    return adj, features

def sparse_mx_to_torch_sparse_tensor(sparse_mx):
    """Convert a scipy sparse matrix to a torch sparse tensor."""
    sparse_mx = sparse_mx.tocoo().astype(np.float32)
    indices = torch.from_numpy(
        np.vstack((sparse_mx.row, sparse_mx.col)).astype(np.int64))
    values = torch.from_numpy(sparse_mx.data)
    shape = torch.Size(sparse_mx.shape)
    return torch.sparse.FloatTensor(indices, values, shape)


def load_citation(dataset_str="cora", normalization="AugNormAdj", porting_to_torch=True,data_path=datadir, task_type="full"):
    """
    Load Citation Networks Datasets.
    """
    names = ['x', 'y', 'tx', 'ty', 'allx', 'ally', 'graph']
    objects = []
    for i in range(len(names)):
        with open(os.path.join(data_path, "ind.{}.{}".format(dataset_str.lower(), names[i])), 'rb') as f:
            if sys.version_info > (3, 0):
                objects.append(pkl.load(f, encoding='latin1'))
            else:
                objects.append(pkl.load(f))

    x, y, tx, ty, allx, ally, graph = tuple(objects)
    test_idx_reorder = parse_index_file(os.path.join(data_path, "ind.{}.test.index".format(dataset_str)))
    test_idx_range = np.sort(test_idx_reorder)

    if dataset_str == 'citeseer':
        # Fix citeseer dataset (there are some isolated nodes in the graph)
        # Find isolated nodes, add them as zero-vecs into the right position
        test_idx_range_full = range(min(test_idx_reorder), max(test_idx_reorder)+1)
        tx_extended = sp.lil_matrix((len(test_idx_range_full), x.shape[1]))
        tx_extended[test_idx_range-min(test_idx_range), :] = tx
        tx = tx_extended
        ty_extended = np.zeros((len(test_idx_range_full), y.shape[1]))
        ty_extended[test_idx_range-min(test_idx_range), :] = ty
        ty = ty_extended

    features = sp.vstack((allx, tx)).tolil()
    features[test_idx_reorder, :] = features[test_idx_range, :]
    G = nx.from_dict_of_lists(graph)
    adj = nx.adjacency_matrix(G)
    adj = adj + adj.T.multiply(adj.T > adj) - adj.multiply(adj.T > adj)
    # degree = np.asarray(G.degree)
    degree = np.sum(adj, axis=1)

    labels = np.vstack((ally, ty))
    labels[test_idx_reorder, :] = labels[test_idx_range, :]
    
    if task_type == "full":
        print("Load full supervised task.")
        #supervised setting
        idx_test = test_idx_range.tolist()
        idx_train = range(len(ally)- 500)
        idx_val = range(len(ally) - 500, len(ally))
    elif task_type == "semi":
        print("Load semi-supervised task.")
        #semi-supervised setting
        idx_test = test_idx_range.tolist()
        idx_train = range(len(y))
        idx_val = range(len(y), len(y)+500)
    else:
        raise ValueError("Task type: %s is not supported. Available option: full and semi.")

    adj, features = preprocess_citation(adj, features, normalization)
    features = np.array(features.todense())
    labels = np.argmax(labels, axis=1)
    # porting to pytorch
    if porting_to_torch:
        features = torch.FloatTensor(features).float()
        labels = torch.LongTensor(labels)
        # labels = torch.max(labels, dim=1)[1]
        adj = sparse_mx_to_torch_sparse_tensor(adj).float()
        idx_train = torch.LongTensor(idx_train)
        idx_val = torch.LongTensor(idx_val)
        idx_test = torch.LongTensor(idx_test)
        degree = torch.LongTensor(degree)
    learning_type = "transductive"
    return adj, features, labels, idx_train, idx_val, idx_test, degree, learning_type

def sgc_precompute(features, adj, degree):
    #t = perf_counter()
    for i in range(degree):
        features = torch.spmm(adj, features)
    precompute_time = 0 #perf_counter()-t
    return features, precompute_time

def set_seed(seed, cuda):
    np.random.seed(seed)
    torch.manual_seed(seed)
    if cuda: torch.cuda.manual_seed(seed)


def loadRedditFromNPZ(dataset_dir=datadir):
    adj = sp.load_npz(dataset_dir+"reddit_adj.npz")
    data = np.load(dataset_dir +"reddit.npz")

    return adj, data['feats'], data['y_train'], data['y_val'], data['y_test'], data['train_index'], data['val_index'], data['test_index']


def load_reddit_data(normalization="AugNormAdj", porting_to_torch=True, data_path=datadir):
    adj, features, y_train, y_val, y_test, train_index, val_index, test_index = loadRedditFromNPZ(data_path)
    labels = np.zeros(adj.shape[0])
    labels[train_index]  = y_train
    labels[val_index]  = y_val
    labels[test_index]  = y_test
    adj = adj + adj.T + sp.eye(adj.shape[0])
    train_adj = adj[train_index, :][:, train_index]
    degree = np.sum(train_adj, axis=1)

    features = torch.FloatTensor(np.array(features))
    features = (features-features.mean(dim=0))/features.std(dim=0)
    train_features = torch.index_select(features, 0, torch.LongTensor(train_index))
    if not porting_to_torch:
        features = features.numpy()
        train_features = train_features.numpy()

    adj_normalizer = fetch_normalization(normalization)
    adj = adj_normalizer(adj)
    train_adj = adj_normalizer(train_adj)

    if porting_to_torch:
        train_adj = sparse_mx_to_torch_sparse_tensor(train_adj).float()
        labels = torch.LongTensor(labels)
        adj = sparse_mx_to_torch_sparse_tensor(adj).float()
        degree = torch.LongTensor(degree)
        train_index = torch.LongTensor(train_index)
        val_index = torch.LongTensor(val_index)
        test_index = torch.LongTensor(test_index)
    learning_type = "inductive"
    return adj, train_adj, features, train_features, labels, train_index, val_index, test_index, degree, learning_type


    
def data_loader(dataset, data_path=datadir, normalization="AugNormAdj", porting_to_torch=True, task_type = "full"):
    if dataset == "reddit":
        return load_reddit_data(normalization, porting_to_torch, data_path)
    else:
        (adj,
         features,
         labels,
         idx_train,
         idx_val,
         idx_test,
         degree,
         learning_type) = load_citation(dataset, normalization, porting_to_torch, data_path, task_type)
        train_adj = adj
        train_features = features
        return adj, train_adj, features, train_features, labels, idx_train, idx_val, idx_test, degree, learning_type
